# Supplementary material for: High-Dose Radiotherapy for Cervical and Upper Thoracic Esophageal Cancer: A Multicenter Real-World Study with Dose-Benefit Exploration
Source: Research Square preprint supplement (doi:10.21203/rs.3.rs-8195163/v1), 2025-12-16
Supplement: Supplementary file 1 [file 5fd16f580cf4186a5ec96b64.xlsx]

## Sheet: raw data for upper thoracic ESC
ID1	序号中心名称	放疗方式，13DCRT2IMRT	照射范围，2IFI1ENI	GTVp	GTVn	VAR00002	原发瘤淋巴结总体积	肿瘤总体积cutoff35.6	病变长度	lengthcutoff4.3	gender	年龄	agegroup	KPSgroup1below900well	smoking1yes	drinking1yes	location（cervical1upperthoracic2）	病理类型1鳞癌，2其他	cTstage	groupedTstage	cNstage	groupedNstage	TNMstage	TNMstage_A	chemotherapy	TRUEnoChemo	联合方式（同步1、续贯2）	化疗周期数	chemotherapycycle14andbelow4	single1ordouble2agent	处方剂量	@5分类剂量5050.41；50.4542；5459.923；59.96624；63以上	@3categoryGTVdose	lowvshigh59.96	MediumVSHigh	OS	OSstatus	放射性食管炎级别（RTOG分级标准）	放射气管炎级别	骨髓抑制级别	胃肠道反应	复发（1原发，2区域淋巴结，3远处转移，4，腹腔	远处转移部位（1肺及胸膜，2肝，3骨，4脑，5其	合并疗效评价，1ORR，2SD或PD	远处转移状态	filter_$
1	3	2	1	18.6382	0	#NULL!	18.6382	1	2	1	1	46	1	0	1	1	2	1	1	1	0	1	1	1	1	1	#NULL!	4	1	2	60	4	2	1	1	115	0	2	0	#NULL!	0	3	1	2	#NULL!	0
2	4	2	1	#NULL!	#NULL!	#NULL!	#NULL!	#NULL!	#NULL!	#NULL!	2	60	1	0	0	0	2	1	1	1	0	1	1	1	1	1	1	2	1	1	48	1	1	0	#NULL!	65.02	0	0	0	0	0	#NULL!	#NULL!	2	#NULL!	#NULL!
3	3	2	2	56	5.06	#NULL!	61.06	2	6.106	2	1	81	2	1	1	1	2	1	3	2	2	2	3	2	0	0	#NULL!	#NULL!	#NULL!	#NULL!	50	1	1	0	#NULL!	17	1	0	0	#NULL!	0	1	#NULL!	2	0	1
4	5	2	1	62.7694	#NULL!	#NULL!	62.7694	2	6.27694	2	1	71	2	1	1	1	2	1	4	2	1	2	4	2	1	1	1	#NULL!	#NULL!	2	60	4	2	1	1	15	1	#NULL!	#NULL!	#NULL!	#NULL!	#NULL!	#NULL!		#NULL!	1
5	4	2	1	21.436	#NULL!	#NULL!	21.436	1	2.1436	1	1	57	1	1	1	1	2	1	4	2	2	2	4	2	0	0	#NULL!	#NULL!	#NULL!	#NULL!	60	4	2	1	1	14.23	1	1	0	0	1	#NULL!	#NULL!		#NULL!	0
6	4	2	1	#NULL!	#NULL!	#NULL!	#NULL!	#NULL!	#NULL!	#NULL!	1	53	1	1	1	0	2	1	3	2	1	2	3	2	0	0	#NULL!	#NULL!	#NULL!	#NULL!	60	4	2	1	1	13.14	1	2	0	2	1	1	#NULL!		#NULL!	#NULL!
7	3	2	1	86.2202	0	#NULL!	86.2202	2	8.62202	2	1	61	1	0	1	1	2	1	4	2	0	1	4	2	1	1	#NULL!	2	1	2	60	4	2	1	1	8	1	2	2	#NULL!	1	2	#NULL!	1	0	1
8	4	2	1	#NULL!	#NULL!	#NULL!	#NULL!	#NULL!	#NULL!	#NULL!	1	52	1	0	0	0	2	1	3	2	2	2	3	2	0	0	#NULL!	#NULL!	#NULL!	#NULL!	60	4	2	1	1	18.69	0	3	0	0	0	#NULL!	#NULL!		#NULL!	#NULL!
9	5	2	1	68.668	#NULL!	#NULL!	68.668	2	6.8668	2	1	66	2	0	1	1	2	1	4	2	2	2	4	2	1	1	1	#NULL!	#NULL!	2	60	4	2	1	1	16	1	#NULL!	#NULL!	#NULL!	#NULL!	#NULL!	#NULL!		#NULL!	1
10	5	2	1	#NULL!	#NULL!	#NULL!	#NULL!	#NULL!	#NULL!	#NULL!	2	53	1	0	1	1	2	1	2	1	0	1	2	1	1	1	1	#NULL!	#NULL!	2	60	4	2	1	1	84	0	#NULL!	#NULL!	#NULL!	#NULL!	#NULL!	#NULL!		0	#NULL!
11	3	2	1	28.4	0	#NULL!	28.4	1	2.84	1	1	58	1	0	1	1	2	1	3	2	0	1	2	1	1	1	#NULL!	2	1	2	60	4	2	1	1	101	0	0	0	#NULL!	1	2	#NULL!	2	#NULL!	0
12	4	2	1	#NULL!	#NULL!	#NULL!	#NULL!	#NULL!	#NULL!	#NULL!	1	73	2	1	1	1	2	1	3	2	2	1	3	2	1	1	1	3	1	1	60	4	2	1	1	1	0	2	0	1	0	#NULL!	#NULL!	1	#NULL!	#NULL!
13	2	2	1	18.8424	6.62875	#NULL!	25.4712	1	4.3	2	1	56	1	1	1	1	2	1	4	2	2	2	3	2	1	1	1	6	2	2	60	4	2	1	1	32	0	1	0	0	1	#NULL!	#NULL!	1	0	1
14	3	2	2	74.8137	0	#NULL!	74.8137	2	7.48137	2	1	67	2	1	1	1	2	1	4	2	0	1	4	2	1	1	#NULL!	#NULL!	#NULL!	#NULL!	60	4	2	1	1	22	1	0	0	2	0	#NULL!	#NULL!	1	0	1
15	3	2	2	67.4032	0	#NULL!	67.4032	2	6.74032	2	1	59	1	0	1	1	2	1	3	2	0	1	2	1	1	1	#NULL!	#NULL!	#NULL!	2	60	4	2	1	1	24	1	1	0	1	0	2	#NULL!	1	#NULL!	1
16	4	1	2	12	#NULL!	#NULL!	22	1	2	#NULL!	2	59	1	1	0	0	2	1	3	2	0	1	2	1	1	1	1	5	2	1	53	2	1	0	#NULL!	2	1	2	0	0	1	#NULL!	#NULL!	1	#NULL!	#NULL!
17	4	2	2	37.8	#NULL!	#NULL!	37.8	2	3.78	1	1	59	1	0	1	1	2	1	2	1	2	2	3	2	1	1	1	4	1	2	50	1	1	0	#NULL!	4.67	0	1	0	1	0	2	#NULL!		#NULL!	0
18	4	2	2	36.4	3.96	#NULL!	40.36	2	4.036	1	1	67	2	1	1	0	2	1	4	2	1	2	4	2	1	1	1	5	2	2	61	4	2	1	1	12.45	0	2	0	2	0	#NULL!	3	1	#NULL!	0
19	1	2	2	21.436	0	#NULL!	21.436	1	5	2	2	68	2	0	1	1	2	1	4	2	0	1	4	2	1	1	#NULL!	4	1	#NULL!	60	4	2	1	1	8	1	1	0	2	0	2	#NULL!	1	#NULL!	1
20	4	2	2	#NULL!	#NULL!	#NULL!	#NULL!	#NULL!	#NULL!	#NULL!	1	51	1	0	1	1	2	1	3	2	3	2	4	2	1	1	1	1	1	1	53	2	1	0	#NULL!	22.9	1	2	0	0	0	1	#NULL!	1	#NULL!	#NULL!
21	5	2	2	#NULL!	#NULL!	#NULL!	#NULL!	#NULL!	#NULL!	#NULL!	2	73	2	0	1	1	2	1	1	1	0	1	3	2	1	1	1	#NULL!	#NULL!	2	60	4	2	1	1	26	0	#NULL!	#NULL!	#NULL!	#NULL!	#NULL!	#NULL!		0	#NULL!
22	1	2	2	105.943	3.96	#NULL!	109.903	2	8	2	1	62	1	0	1	1	2	2	2	1	1	2	2	1	1	1	#NULL!	4	1	2	62	4	2	1	1	54	1	0	0	2	0	#NULL!	#NULL!	1	#NULL!	1
23	5	2	2	68.668	#NULL!	#NULL!	68.668	2	6.8668	2	1	63	1	#NULL!	1	1	2	2	4	2	3	2	4	2	1	1	1	#NULL!	#NULL!	2	66	5	3	1	2	10	1	#NULL!	#NULL!	#NULL!	#NULL!	1	#NULL!		0	1
24	5	2	2	#NULL!	#NULL!	#NULL!	6.4401	1	4	#NULL!	1	68	2	0	1	1	2	1	2	1	1	2	2	1	1	1	1	#NULL!	#NULL!	2	60	4	2	1	1	22	1	#NULL!	#NULL!	#NULL!	#NULL!	#NULL!	#NULL!		#NULL!	#NULL!
25	2	2	2	46.368	6.52	#NULL!	52.888	2	3	1	2	55	1	0	0	1	2	1	3	2	2	2	3	2	1	1	1	2	1	2	59	4	2	1	1	33	0	0	0	0	1	#NULL!	#NULL!	1	#NULL!	0
26	4	2	2	#NULL!	#NULL!	#NULL!	#NULL!	#NULL!	#NULL!	#NULL!	2	65	1	1	0	0	2	1	3	2	1	2	3	2	0	0	#NULL!	#NULL!	#NULL!	#NULL!	60	4	2	1	1	5.45	1	1	0	1	0	1	#NULL!	2	#NULL!	#NULL!
27	4	2	2	61.5	#NULL!	#NULL!	61.5	2	6.15	2	1	59	1	1	1	1	2	1	4	2	3	2	4	2	1	1	1	1	1	1	60	4	2	1	1	1.64	1	1	0	0	0	2	#NULL!	1	#NULL!	1
28	4	2	2	#NULL!	#NULL!	#NULL!	#NULL!	#NULL!	#NULL!	#NULL!	1	58	1	1	1	1	2	1	3	2	2	2	3	2	1	1	1	2	1	2	50	1	1	0	#NULL!	14.82	0	0	0	0	1	#NULL!	#NULL!		#NULL!	#NULL!
29	3	2	2	12.6544	0	#NULL!	12.6544	1	2	1	1	64	1	1	1	1	2	1	4	2	0	1	2	1	1	1	#NULL!	#NULL!	#NULL!	2	60	4	2	1	1	44	0	1	0	4	1	#NULL!	#NULL!	2	0	0
30	3	2	2	25.2	79	#NULL!	104.2	2	10.42	2	1	70	2	1	1	1	2	1	2	1	1	2	3	2	1	1	#NULL!	#NULL!	#NULL!	2	59	4	2	1	1	69	0	0	0	#NULL!	1	#NULL!	#NULL!	1	0	1
31	3	2	2	14.5208	1.9	#NULL!	16.4208	1	3	1	1	59	1	1	1	1	2	1	2	1	1	2	2	1	1	1	#NULL!	2	1	2	60	4	2	1	1	96	0	2	0	#NULL!	0	2	#NULL!	1	#NULL!	0
32	1	2	2	67.4032	3.15	#NULL!	70.5532	2	7	2	1	53	1	0	1	1	2	2	3	2	1	2	4	2	1	1	#NULL!	2	1	2	62	4	2	1	1	8	1	0	0	2	1	2	#NULL!	1	#NULL!	1
33	4	2	2	#NULL!	#NULL!	#NULL!	#NULL!	#NULL!	#NULL!	#NULL!	1	75	2	0	0	0	2	1	3	2	0	1	2	1	0	0	#NULL!	#NULL!	#NULL!	#NULL!	56	3	1	0	#NULL!	13.34	0	2	0	0	1	#NULL!	#NULL!	2	#NULL!	#NULL!
34	3	2	1	18.3	5.71298	#NULL!	24.013	1	2.4013	1	1	79	2	1	1	1	2	1	2	1	1	2	2	1	0	0	#NULL!	#NULL!	#NULL!	#NULL!	59	4	2	1	1	38	1	0	0	#NULL!	1	#NULL!	#NULL!	1	#NULL!	0
35	3	2	2	5.4	2.61	#NULL!	8.01	2	2	1	1	56	1	0	1	1	2	1	2	1	1	2	3	2	1	1	#NULL!	#NULL!	#NULL!	1	50	1	1	0	#NULL!	2	1	#NULL!	0	#NULL!	#NULL!	#NULL!	#NULL!	2	0	0
36	5	2	2	59.7	0	#NULL!	59.7	2	5.97	2	1	59	1	#NULL!	1	1	2	2	3	2	0	1	2	1	1	1	1	#NULL!	#NULL!	2	66	5	3	1	2	68	0	#NULL!	#NULL!	#NULL!	#NULL!	2	#NULL!		0	1
37	4	2	2	41.9	#NULL!	#NULL!	41.9	2	4.19	1	1	71	2	1	1	1	2	1	4	2	2	2	4	2	1	1	1	1	1	2	50	1	1	0	#NULL!	4.99	1	0	0	2	0	1	#NULL!		#NULL!	0
38	1	2	2	30.8247	2.63567	#NULL!	33.4604	1	3	1	2	61	1	0	1	1	2	1	2	1	1	2	3	2	1	1	#NULL!	2	1	2	63	4	3	1	2	83	0	1	0	3	0	#NULL!	#NULL!	1	0	0
39	3	2	2	25.5756	1.7	#NULL!	27.2756	1	2.72756	1	1	72	2	1	1	1	2	1	2	1	2	2	3	2	1	1	#NULL!	#NULL!	#NULL!	2	60	4	2	1	1	127	0	0	0	1	0	#NULL!	#NULL!	1	#NULL!	0
40	4	2	2	25.114	#NULL!	#NULL!	25.114	1	2.5114	1	1	54	1	1	1	1	2	1	4	2	3	2	4	2	1	1	1	4	1	2	50	1	1	0	#NULL!	14.52	1	0	0	0	0	1	#NULL!		#NULL!	0
41	5	2	2	#NULL!	#NULL!	#NULL!	17.9357	1	6	#NULL!	1	67	2	#NULL!	1	1	2	1	2	1	1	2	2	1	1	1	1	#NULL!	#NULL!	2	66	5	3	1	2	68	0	#NULL!	#NULL!	#NULL!	#NULL!	2	#NULL!		0	#NULL!
42	1	2	2	53.2	6.17	#NULL!	59.37	2	6	2	1	54	1	0	1	1	2	1	3	2	1	2	3	2	1	1	#NULL!	4	1	1	62	4	2	1	1	11	1	1	0	4	0	4	#NULL!	1	#NULL!	1
43	5	2	2	16.2495	#NULL!	#NULL!	16.2495	1	3	1	1	62	1	1	1	1	2	1	4	2	1	2	4	2	1	1	1	#NULL!	#NULL!	2	60	4	2	1	1	8	1	#NULL!	#NULL!	#NULL!	#NULL!	#NULL!	#NULL!		#NULL!	0
44	5	2	2	#NULL!	#NULL!	#NULL!	#NULL!	#NULL!	#NULL!	#NULL!	1	57	1	0	1	1	2	1	2	1	0	1	2	1	1	1	1	#NULL!	#NULL!	#NULL!	56	3	1	0	#NULL!	17	0	#NULL!	#NULL!	#NULL!	#NULL!	#NULL!	#NULL!		0	#NULL!
45	4	2	1	39.7	0	#NULL!	39.7	2	3.97	1	2	79	2	1	0	0	2	1	4	2	0	1	4	2	0	0	#NULL!	#NULL!	#NULL!	#NULL!	63	4	3	1	2	2.07	1	0	0	0	0	1	#NULL!		#NULL!	0
46	5	2	2	75.7027	0	#NULL!	75.7027	2	7.57027	2	1	62	1	#NULL!	1	1	2	2	4	2	0	1	4	2	1	1	1	#NULL!	#NULL!	2	64	5	3	1	2	76	0	#NULL!	#NULL!	#NULL!	#NULL!	#NULL!	#NULL!		0	1
47	3	2	2	25.1498	33.9533	#NULL!	59.1031	2	5.91031	2	1	51	1	0	1	1	2	1	1	1	2	2	2	1	1	1	#NULL!	#NULL!	#NULL!	#NULL!	62	4	2	1	1	92	0	#NULL!	#NULL!	#NULL!	#NULL!	#NULL!	#NULL!	1	0	1
48	1	2	2	25.114	#NULL!	#NULL!	25.114	1	3.4	1	1	56	1	0	1	1	2	2	4	2	1	2	4	2	1	1	#NULL!	7	2	2	63	4	3	1	2	8	1	0	0	0	0	4	#NULL!	2	#NULL!	0
49	1	2	2	43.6432	0	#NULL!	43.6432	2	8	2	2	62	1	0	1	1	2	2	4	2	0	1	4	2	1	1	#NULL!	2	1	2	63	4	3	1	2	30	0	3	0	2	1	#NULL!	#NULL!	1	#NULL!	1
50	3	2	2	48.8252	28.03	#NULL!	76.8552	2	7.68552	2	1	62	1	0	1	1	2	1	4	2	1	2	4	2	1	1	#NULL!	#NULL!	#NULL!	2	66	5	3	1	2	43	1	1	0	#NULL!	0	1	#NULL!		#NULL!	1
51	1	2	2	26.3766	5.06	#NULL!	31.4366	1	6	2	1	85	2	0	1	0	2	2	4	2	2	2	4	2	1	1	#NULL!	0	#NULL!	2	63	4	3	1	2	13	1	1	0	1	1	1	#NULL!	1	#NULL!	1
52	4	2	#NULL!	#NULL!	#NULL!	#NULL!	#NULL!	#NULL!	#NULL!	#NULL!	1	57	1	0	1	1	2	1	3	2	2	2	3	2	1	1	1	5	2	1	60	4	2	1	1	17.45	0	3	0	2	1	2	#NULL!	1	#NULL!	#NULL!
53	3	2	#NULL!	57.5	0	#NULL!	57.5	2	5.75	2	1	68	2	1	1	1	2	1	3	2	0	1	2	1	1	1	#NULL!	#NULL!	#NULL!	2	59	4	2	1	1	7	1	4	1	#NULL!	0	1	#NULL!	2	0	1
54	3	2	#NULL!	39.1099	32.24	#NULL!	71.3499	2	7.13499	2	1	55	1	0	1	1	2	1	4	2	3	2	4	2	1	1	#NULL!	#NULL!	#NULL!	1	51	2	1	0	#NULL!	22	1	0	0	#NULL!	0	#NULL!	#NULL!	2	0	1
55	4	2	#NULL!	#NULL!	#NULL!	#NULL!	#NULL!	#NULL!	#NULL!	#NULL!	1	62	1	1	1	1	2	1	3	2	1	2	3	2	1	1	1	4	1	1	50	1	1	0	#NULL!	20.83	0	2	0	0	0	1	#NULL!	2	#NULL!	#NULL!
56	1	2	#NULL!	55.6057	#NULL!	#NULL!	55.6057	2	5	2	1	55	1	0	1	1	2	1	2	1	1	2	2	1	1	1	#NULL!	7	2	2	50	1	1	0	#NULL!	24	0	1	0	1	0	#NULL!	#NULL!	2	#NULL!	1
57	1	2	#NULL!	31.6032	0	#NULL!	31.6032	1	5	2	1	84	2	0	1	1	2	1	3	2	0	1	2	1	1	1	#NULL!	0	#NULL!	2	60	4	2	1	1	68	1	0	0	0	0	1	#NULL!	1	#NULL!	1
58	1	2	#NULL!	26.9982	#NULL!	#NULL!	26.9982	1	4	1	1	68	2	0	1	1	2	2	2	1	1	2	2	1	1	1	#NULL!	2	1	2	62	4	2	1	1	49	1	0	0	1	0	#NULL!	#NULL!	2	#NULL!	0
59	5	2	#NULL!	25.415	0	#NULL!	25.415	1	2.5415	1	1	54	1	1	1	1	2	1	4	2	0	1	4	2	1	1	1	#NULL!	#NULL!	2	60	4	2	1	1	6	1	#NULL!	#NULL!	#NULL!	#NULL!	#NULL!	#NULL!		#NULL!	0
60	2	2	#NULL!	#NULL!	#NULL!	#NULL!	#NULL!	#NULL!	5	2	1	52	1	0	0	1	2	1	2	1	0	1	1	1	1	1	1	2	1	2	59	4	2	1	1	39	0	2	0	2	0	#NULL!	#NULL!	1	#NULL!	1
61	2	2	#NULL!	#NULL!	#NULL!	#NULL!	#NULL!	#NULL!	2	1	1	52	1	0	0	1	2	1	2	1	0	1	1	1	1	1	1	4	1	2	60	4	2	1	1	39	0	2	0	2	1	#NULL!	#NULL!	1	#NULL!	0
62	1	1	#NULL!	30.8292	#NULL!	#NULL!	30.8292	1	4.9	2	1	59	1	0	1	1	2	2	4	2	2	2	4	2	1	1	#NULL!	2	1	1	63	4	3	1	2	7	1	2	0	0	0	#NULL!	#NULL!	2	#NULL!	1
63	5	2	#NULL!	19.3881	0	#NULL!	19.3881	1	5	2	1	71	2	0	1	1	2	1	3	2	0	1	3	2	1	1	1	#NULL!	#NULL!	1	59	4	2	1	1	10	0	2	#NULL!	#NULL!	0	#NULL!	#NULL!		0	1
64	1	2	#NULL!	108.816	#NULL!	#NULL!	108.816	2	10	2	1	53	1	0	1	1	2	1	4	2	2	2	4	2	1	1	#NULL!	2	1	2	60	4	2	1	1	10	1	2	0	1	0	#NULL!	#NULL!	1	#NULL!	1
65	5	2	#NULL!	17.9385	#NULL!	#NULL!	17.9385	1	6	2	2	72	2	1	1	1	2	1	4	2	1	2	4	2	1	1	1	#NULL!	#NULL!	1	60	4	2	1	1	58	0	#NULL!	#NULL!	#NULL!	#NULL!	#NULL!	#NULL!		0	1
66	1	2	#NULL!	23.5535	#NULL!	#NULL!	23.5535	1	6	2	1	68	2	0	1	1	2	1	4	2	1	2	4	2	1	1	#NULL!	2	1	2	60	4	2	1	1	21	1	0	0	2	1	#NULL!	5	1	#NULL!	1
67	1	2	#NULL!	35.1386	#NULL!	#NULL!	35.1386	2	6.3	2	1	53	1	0	1	1	2	2	4	2	2	2	4	2	1	1	#NULL!	5	2	2	62	4	2	1	1	22	0	1	0	3	1	#NULL!	#NULL!	1	#NULL!	1
68	5	2	#NULL!	10.3077	#NULL!	#NULL!	10.3077	1	4	1	2	70	2	1	1	1	2	1	4	2	2	2	4	2	1	1	1	#NULL!	#NULL!	1	60	4	2	1	1	62	0	#NULL!	#NULL!	#NULL!	#NULL!	#NULL!	#NULL!		0	0
69	5	2	#NULL!	#NULL!	#NULL!	#NULL!	#NULL!	#NULL!	#NULL!	#NULL!	1	72	2	0	1	1	2	1	2	1	0	1	2	1	1	1	1	#NULL!	#NULL!	1	60	4	2	1	1	28	1	#NULL!	#NULL!	#NULL!	#NULL!	#NULL!	#NULL!		0	#NULL!
70	4	2	#NULL!	#NULL!	#NULL!	#NULL!	#NULL!	#NULL!	#NULL!	#NULL!	1	61	1	1	1	1	2	1	3	2	3	2	4	2	1	1	1	1	1	1	49	1	1	0	#NULL!	12.85	1	2	0	0	1	#NULL!	#NULL!	1	#NULL!	#NULL!
71	1	2	#NULL!	24.4858	5.13	#NULL!	29.6158	1	4	1	1	60	1	0	1	1	2	1	3	2	1	2	3	2	1	1	#NULL!	4	1	2	60	4	2	1	1	9	1	1	0	2	1	3	3	1	#NULL!	0
72	1	2	#NULL!	#NULL!	#NULL!	#NULL!	11	1	1	#NULL!	2	63	1	0	1	1	2	2	2	1	2	2	3	2	1	1	#NULL!	1	1	1	62	4	2	1	1	34	0	2	0	0	1	#NULL!	#NULL!	1	#NULL!	#NULL!
73	1	2	#NULL!	10.7474	#NULL!	#NULL!	10.7474	1	2	1	2	76	2	0	1	1	2	2	2	1	1	2	2	1	0	0	#NULL!	0	#NULL!	#NULL!	66	5	3	1	2	48	0	0	0	1	0	#NULL!	#NULL!	2	#NULL!	0
74	1	2	#NULL!	18.2688	0	#NULL!	18.2688	1	4.8	2	1	52	1	0	1	1	2	2	4	2	0	1	4	2	1	1	#NULL!	2	1	2	66	5	3	1	2	33	1	0	0	2	0	3	1	2	#NULL!	1
75	1	2	1	31.5169	0	#NULL!	31.5169	1	3	1	2	79	2	0	1	1	2	1	4	2	0	1	2	1	1	1	#NULL!	2	1	2	60	4	2	1	1	57	0	1	0	0	0	#NULL!	#NULL!	1	#NULL!	0
76	1	1	#NULL!	36	2.65	#NULL!	38.65	2	2.3	1	2	70	2	0	1	1	2	1	3	2	2	2	3	2	1	1	#NULL!	4	1	2	60	4	2	1	1	29	1	1	1	4	0	1	1	1	#NULL!	0
77	1	2	#NULL!	5.9223	0	#NULL!	5.9223	1	2	1	1	56	1	0	1	1	2	2	2	1	0	1	2	1	1	1	#NULL!	1	#NULL!	2	63	4	3	1	2	36	0	2	0	0	1	#NULL!	#NULL!	1	#NULL!	0
78	4	2	#NULL!	43.6432	#NULL!	#NULL!	43.6432	2	4.36432	2	1	57	1	1	1	1	2	1	4	2	3	2	4	2	1	1	1	5	2	2	60	4	2	1	1	7.66	1	2	0	2	1	3	1	1	#NULL!	1
79	1	2	#NULL!	32.992	#NULL!	#NULL!	32.992	1	9	2	2	53	1	0	1	1	2	2	4	2	1	2	4	2	1	1	#NULL!	2	1	2	62	4	2	1	1	39	1	0	0	2	1	#NULL!	#NULL!	1	#NULL!	1
80	4	2	#NULL!	13.3	5.26	#NULL!	18.56	1	2	1	2	72	2	1	0	0	2	1	4	2	1	2	4	2	1	1	1	1	1	1	60	4	2	1	1	30.32	0	1	0	0	1	#NULL!	#NULL!		#NULL!	0
81	1	2	1	26.3353	#NULL!	#NULL!	26.3353	1	5	2	1	72	2	0	1	1	2	2	4	2	2	2	4	2	0	0	#NULL!	0	#NULL!	#NULL!	62	4	2	1	1	34	0	1	1	1	1	#NULL!	#NULL!	2	#NULL!	1
82	4	2	1	32.5	#NULL!	#NULL!	32.5	1	3.25	1	1	70	2	0	1	1	2	1	4	2	1	2	4	2	1	1	1	5	2	2	60	4	2	1	1	4.99	0	2	0	2	0	#NULL!	#NULL!		#NULL!	0
83	1	2	1	9.0091	#NULL!	#NULL!	9.0091	1	6	2	1	64	1	0	1	1	2	1	4	2	2	2	4	2	1	1	#NULL!	2	1	#NULL!	60	4	2	1	1	30	1	0	0	0	1	#NULL!	#NULL!	2	#NULL!	1
84	4	2	1	26.7	5.88	#NULL!	32.58	1	3.258	1	1	52	1	0	1	1	2	1	4	2	1	2	4	2	1	1	1	4	1	#NULL!	60	4	2	1	1	51.88	0	0	0	0	0	#NULL!	#NULL!		#NULL!	0
85	3	2	1	32	#NULL!	#NULL!	32	1	3.2	1	1	66	2	0	1	1	2	1	3	2	2	2	3	2	1	1	#NULL!	3	1	2	60	4	2	1	1	34	0	1	0	#NULL!	0	#NULL!	#NULL!	1	#NULL!	0
86	1	2	#NULL!	39.4232	1.42	#NULL!	40.8432	2	4	1	2	82	2	0	1	1	2	1	1	1	1	2	2	1	1	1	#NULL!	1	1	2	50	1	1	0	#NULL!	65	0	0	0	0	1	#NULL!	#NULL!	1	#NULL!	0
87	1	2	1	18.3037	#NULL!	#NULL!	18.3037	1	7	2	2	58	1	0	1	1	2	1	4	2	1	2	4	2	1	1	#NULL!	4	1	2	60	4	2	1	1	37	0	1	0	2	0	#NULL!	#NULL!	2	#NULL!	1
88	4	2	1	#NULL!	#NULL!	#NULL!	#NULL!	#NULL!	#NULL!	#NULL!	1	62	1	0	0	1	2	1	3	2	2	2	3	2	0	0	#NULL!	#NULL!	#NULL!	#NULL!	54	2	1	0	#NULL!	9.26	0	0	0	1	0	#NULL!	#NULL!	2	#NULL!	#NULL!
89	3	2	1	40.3	12.5653	#NULL!	52.8653	2	5.28653	2	1	64	1	1	1	1	2	1	3	2	1	2	3	2	0	0	#NULL!	#NULL!	#NULL!	#NULL!	59	4	2	1	1	25	1	2	3	#NULL!	0	#NULL!	#NULL!	1	0	1
90	1	2	1	14.7751	6.22	#NULL!	20.9951	1	5	2	2	62	1	0	1	1	2	1	2	1	1	2	2	1	1	1	#NULL!	3	1	#NULL!	60	4	2	1	1	36	1	0	0	3	0	#NULL!	#NULL!	1	#NULL!	1
91	5	2	1	44.1528	0	#NULL!	44.1528	2	4.41528	2	1	62	1	1	1	1	2	2	3	2	0	1	3	2	1	1	1	#NULL!	#NULL!	2	60	4	2	1	1	5	0	2	#NULL!	#NULL!	0	#NULL!	#NULL!		0	1
92	5	2	1	19.6182	0	#NULL!	19.6182	1	2	1	1	63	1	1	1	1	2	1	3	2	0	1	3	2	1	1	1	#NULL!	#NULL!	2	60	4	2	1	1	78	0	#NULL!	#NULL!	#NULL!	#NULL!	#NULL!	#NULL!		0	0
93	1	1	1	85.6749	8.54299	#NULL!	94.2179	2	8	2	1	61	1	0	1	1	2	2	4	2	2	2	4	2	1	1	#NULL!	3	1	2	60	4	2	1	1	49	1	0	0	2	0	3	2	1	#NULL!	1
94	1	2	1	39.1648	0	#NULL!	39.1648	2	6	2	1	45	1	0	1	1	2	1	4	2	0	1	4	2	1	1	#NULL!	4	1	#NULL!	60	4	2	1	1	74	0	1	0	2	0	#NULL!	#NULL!	1	#NULL!	1
95	1	2	1	27.1626	0	#NULL!	27.1626	1	5	2	1	79	2	0	1	1	2	1	3	2	0	1	2	1	1	1	#NULL!	0	#NULL!	2	60	4	2	1	1	75	1	1	0	0	1	#NULL!	#NULL!	1	#NULL!	1
96	3	2	1	10.0327	#NULL!	#NULL!	10.0327	1	3	1	1	56	1	0	1	1	2	1	4	2	2	2	4	2	1	1	#NULL!	4	1	2	60	4	2	1	1	4	1	#NULL!	#NULL!	#NULL!	#NULL!	1	#NULL!	1	0	0
97	1	2	1	12.948	3.96	#NULL!	16.908	1	6	2	1	56	1	0	1	1	2	2	4	2	1	2	4	2	1	1	#NULL!	4	1	2	62	4	2	1	1	19	1	1	0	2	0	1	#NULL!	1	#NULL!	1
98	1	2	1	12.8654	0	#NULL!	12.8654	1	2.5	1	1	61	1	0	1	1	2	1	3	2	0	1	2	1	1	1	#NULL!	7	2	2	50	1	1	0	#NULL!	24	0	2	0	2	0	#NULL!	#NULL!	2	#NULL!	0
99	1	2	1	36.1	15.51	#NULL!	51.61	2	6	2	1	70	2	0	1	1	2	2	4	2	2	2	4	2	1	1	#NULL!	3	1	#NULL!	65	5	3	1	2	11	1	1	0	3	0	4	2	1	#NULL!	1
100	1	2	#NULL!	20.9956	1.4	#NULL!	22.3956	1	5	2	2	82	2	0	1	1	2	2	4	2	2	2	3	2	0	0	#NULL!	0	#NULL!	#NULL!	62	4	2	1	1	30	1	1	0	0	1	1	#NULL!	1	#NULL!	1
101	5	2	1	87.1334	0	#NULL!	87.1334	2	8.71334	2	2	71	2	#NULL!	1	1	2	2	4	2	0	1	4	2	1	1	1	#NULL!	#NULL!	2	64	5	3	1	2	61	0	#NULL!	#NULL!	#NULL!	#NULL!	#NULL!	#NULL!		0	1
102	1	2	1	93.585	5.79	#NULL!	99.375	2	5	2	1	51	1	0	1	1	2	2	3	2	1	2	3	2	1	1	#NULL!	3	1	2	62	4	2	1	1	55	0	0	0	1	1	#NULL!	2	1	#NULL!	1
103	1	2	1	17.517	#NULL!	#NULL!	17.517	1	4	1	2	64	1	0	1	1	2	2	4	2	1	2	4	2	1	1	#NULL!	2	1	#NULL!	63	4	3	1	2	24	0	2	0	2	1	#NULL!	#NULL!	1	#NULL!	0
104	3	2	1	23.4289	#NULL!	#NULL!	23.4289	1	2.34289	1	1	62	1	1	1	1	2	1	2	1	2	2	2	1	1	1	#NULL!	#NULL!	#NULL!	2	60	4	2	1	1	111	1	0	0	#NULL!	1	#NULL!	#NULL!	1	#NULL!	0
105	1	1	1	39.5674	#NULL!	#NULL!	39.5674	2	6.9	2	1	77	2	0	1	1	2	2	3	2	1	2	4	2	1	1	#NULL!	0	#NULL!	2	62	4	2	1	1	23	0	1	0	0	1	#NULL!	#NULL!	2	#NULL!	1
106	1	2	1	54.4011	#NULL!	#NULL!	54.4011	2	7	2	1	48	1	0	1	1	2	2	4	2	2	2	4	2	1	1	#NULL!	3	1	2	62	4	2	1	1	36	0	1	0	3	0	4	#NULL!	2	#NULL!	1
107	1	2	1	31.7688	#NULL!	#NULL!	31.7688	1	8	2	1	49	1	0	1	1	2	2	4	2	2	2	4	2	1	1	#NULL!	2	1	2	62	4	2	1	1	15	1	1	0	2	0	#NULL!	#NULL!	1	#NULL!	1
108	1	2	1	12.5184	#NULL!	#NULL!	12.5184	1	5	2	2	53	1	0	1	1	2	1	4	2	1	2	4	2	1	1	#NULL!	0	#NULL!	2	50	1	1	0	#NULL!	22	0	1	0	2	0	1	#NULL!	2	#NULL!	1
109	3	2	1	80.9144	15	#NULL!	95.9144	2	9.59144	2	1	50	1	0	1	1	2	1	2	1	1	2	2	1	1	1	#NULL!	#NULL!	#NULL!	2	60	4	2	1	1	25	1	#NULL!	#NULL!	#NULL!	#NULL!	1	#NULL!	1	#NULL!	1
110	1	2	1	44.6375	#NULL!	#NULL!	44.6375	2	7	2	1	65	1	1	1	1	2	1	4	2	1	2	4	2	1	1	#NULL!	2	1	1	59	4	2	1	1	7	1	1	0	1	0	#NULL!	#NULL!	2	#NULL!	1
111	4	2	1	#NULL!	#NULL!	#NULL!	#NULL!	#NULL!	#NULL!	#NULL!	1	78	2	1	1	1	2	1	3	2	2	2	3	2	0	0	#NULL!	#NULL!	#NULL!	#NULL!	66	5	3	1	2	47.97	0	1	0	0	1	#NULL!	#NULL!		#NULL!	#NULL!
112	1	2	1	44.8636	#NULL!	#NULL!	44.8636	2	4	1	1	62	1	0	1	1	2	2	3	2	1	2	3	2	1	1	#NULL!	4	1	2	62	4	2	1	1	33	0	0	0	2	1	#NULL!	#NULL!	2	#NULL!	0
113	4	2	1	#NULL!	#NULL!	#NULL!	#NULL!	#NULL!	#NULL!	#NULL!	1	63	1	1	1	1	2	1	3	2	1	2	3	2	1	1	1	4	1	2	60	4	2	1	1	20.73	1	2	0	0	1	#NULL!	3	2	#NULL!	#NULL!
114	3	2	1	55.9127	20.66	#NULL!	76.5727	2	7.65727	2	1	67	2	1	1	1	2	1	4	1	3	1	4	2	1	1	#NULL!	#NULL!	#NULL!	2	60	4	2	1	1	107	1	0	0	#NULL!	1	#NULL!	#NULL!	1	#NULL!	1
115	1	2	1	91.5275	20.1111	#NULL!	111.639	2	4	1	1	70	2	0	1	1	2	2	4	2	3	2	4	2	1	1	#NULL!	3	1	1	63	4	3	1	2	10	1	1	0	4	1	3	3	1	#NULL!	0
116	4	2	1	49.4939	#NULL!	#NULL!	49.4939	2	4.94939	2	1	68	2	1	1	1	2	1	4	2	2	2	4	2	1	1	1	4	1	2	60	4	2	1	1	22.41	0	3	0	1	0	#NULL!	#NULL!	2	#NULL!	1
117	4	2	1	85.8	#NULL!	#NULL!	85.8	2	8.58	2	1	74	2	0	0	0	2	1	4	2	2	2	4	2	1	1	1	1	1	1	60	4	2	1	1	21.26	0	1	0	0	0	#NULL!	#NULL!	1	#NULL!	1
118	1	2	1	118.339	5.37	#NULL!	123.709	2	6	2	1	61	1	0	1	1	2	2	4	2	3	2	4	2	1	1	#NULL!	4	1	2	62	4	2	1	1	12	1	1	0	1	0	3	1	1	#NULL!	1
119	4	2	1	#NULL!	#NULL!	#NULL!	#NULL!	#NULL!	#NULL!	#NULL!	1	54	1	0	1	0	2	1	3	2	2	2	3	2	1	1	1	5	2	#NULL!	60	4	2	1	1	14.88	0	1	0	1	1	1	#NULL!	2	#NULL!	#NULL!
120	4	2	1	#NULL!	#NULL!	#NULL!	#NULL!	#NULL!	#NULL!	#NULL!	1	55	1	0	1	0	2	1	3	2	2	2	4	2	1	1	1	#NULL!	#NULL!	#NULL!	60	4	2	1	1	5.75	1	1	0	3	0	1	#NULL!	1	#NULL!	#NULL!
121	1	2	1	81.2577	4.5621	#NULL!	85.8198	2	10	2	1	54	1	0	1	1	2	2	4	2	2	2	3	2	1	1	#NULL!	3	1	#NULL!	63	4	3	1	2	18	1	1	0	3	0	2	#NULL!	1	#NULL!	1
122	3	2	1	9.9	#NULL!	#NULL!	9.9	1	2	1	1	54	1	1	1	1	2	1	2	1	2	2	3	2	1	1	#NULL!	#NULL!	#NULL!	#NULL!	60	4	2	1	1	23	1	2	0	#NULL!	1	#NULL!	#NULL!	1	#NULL!	0
123	4	2	1	#NULL!	#NULL!	#NULL!	#NULL!	#NULL!	#NULL!	#NULL!	1	61	1	1	1	0	2	1	3	2	1	2	3	2	1	1	1	5	2	2	66	5	3	1	2	6.87	1	0	0	1	0	#NULL!	#NULL!		#NULL!	#NULL!
124	3	2	1	34.3	1.64	#NULL!	35.94	2	3.594	1	1	48	1	0	1	1	2	1	3	2	1	2	3	2	0	0	#NULL!	#NULL!	#NULL!	#NULL!	61	4	2	1	1	37	0	1	0	#NULL!	0	#NULL!	#NULL!	1	#NULL!	0
125	3	1	1	28.4987	3.27795	#NULL!	31.7767	1	3.17767	1	1	57	1	1	1	1	2	1	2	1	1	2	2	1	1	1	#NULL!	#NULL!	#NULL!	2	62	4	2	1	1	37	0	0	0	1	0	#NULL!	#NULL!		#NULL!	0
126	4	2	1	57.9	#NULL!	#NULL!	57.9	2	5.79	2	2	60	1	1	0	0	2	1	4	2	2	2	4	2	1	1	1	4	1	2	49	1	1	0	#NULL!	72.18	0	2	0	3	0	#NULL!	#NULL!	1	#NULL!	1
127	4	2	1	26.9982	#NULL!	#NULL!	26.9982	1	2.69982	1	1	59	1	0	1	1	2	1	4	2	2	2	4	2	1	1	1	2	1	2	60	4	2	1	1	17.81	0	3	0	2	0	2	#NULL!		#NULL!	0
128	4	2	1	#NULL!	#NULL!	#NULL!	#NULL!	#NULL!	#NULL!	#NULL!	1	63	1	0	0	1	2	1	3	2	3	2	4	2	1	1	1	4	1	2	60	4	2	1	1	26.35	0	0	0	2	0	#NULL!	5		#NULL!	#NULL!
129	4	2	1	30.8292	#NULL!	#NULL!	30.8292	1	3.08292	1	1	65	1	0	1	0	2	1	4	2	3	2	4	2	1	1	1	3	1	1	60	4	2	1	1	3.81	0	2	0	2	1	#NULL!	#NULL!		#NULL!	0
130	5	2	1	24.662	#NULL!	#NULL!	24.662	1	2.4662	1	1	59	1	1	1	1	2	1	3	2	3	2	2	1	1	1	1	#NULL!	#NULL!	2	60	4	2	1	1	25	0	#NULL!	#NULL!	#NULL!	#NULL!	#NULL!	#NULL!		0	0
131	5	2	1	38.0607	0	#NULL!	38.0607	2	3.80607	1	1	72	2	1	1	1	2	2	4	2	0	1	4	2	1	1	1	#NULL!	#NULL!	2	60	4	2	1	1	21	0	#NULL!	#NULL!	#NULL!	#NULL!	#NULL!	#NULL!		0	0
132	1	2	1	11.1208	0	#NULL!	11.1208	1	3	1	1	63	1	0	1	1	2	1	4	2	0	1	4	2	1	1	#NULL!	7	2	2	50	1	1	0	#NULL!	26	1	1	0	2	0	#NULL!	4	1	#NULL!	0
133	5	2	1	16.2792	0	#NULL!	16.2792	1	5	2	2	60	1	#NULL!	1	1	2	2	4	2	0	1	4	2	1	1	1	#NULL!	#NULL!	#NULL!	66	5	3	1	2	78	0	#NULL!	#NULL!	#NULL!	#NULL!	#NULL!	#NULL!		0	1
134	5	2	1	35.8583	#NULL!	#NULL!	35.8583	2	3.58583	1	2	70	2	1	1	1	2	1	4	2	2	2	4	2	1	1	1	#NULL!	#NULL!	#NULL!	60	4	2	1	1	3	1	4	#NULL!	#NULL!	0	#NULL!	#NULL!		0	0
135	5	2	1	28.2658	#NULL!	#NULL!	28.2658	1	2.82658	1	2	77	2	1	1	1	2	1	4	2	1	2	4	2	1	1	1	#NULL!	#NULL!	2	60	4	2	1	1	13	1	#NULL!	#NULL!	#NULL!	#NULL!	#NULL!	#NULL!		0	0
136	5	2	1	#NULL!	#NULL!	#NULL!	#NULL!	#NULL!	#NULL!	#NULL!	2	70	2	#NULL!	1	1	2	2	2	1	1	2	2	1	1	1	1	#NULL!	#NULL!	1	66	5	3	1	2	68	0	#NULL!	#NULL!	#NULL!	#NULL!	#NULL!	#NULL!		0	#NULL!
137	5	1	1	46.8781	0	#NULL!	46.8781	2	4.68781	2	1	71	2	#NULL!	1	1	2	2	4	2	0	1	4	2	1	1	1	#NULL!	#NULL!	2	64	5	3	1	2	9	1	#NULL!	#NULL!	#NULL!	#NULL!	#NULL!	#NULL!		#NULL!	1
138	3	1	1	80.9606	7.27255	#NULL!	88.2331	2	8.82331	2	1	69	2	1	1	1	2	1	2	1	1	2	2	1	1	1	#NULL!	#NULL!	#NULL!	2	64	5	3	1	2	12	1	0	0	1	1	2	#NULL!	1	#NULL!	1
139	4	1	1	#NULL!	#NULL!	#NULL!	#NULL!	#NULL!	#NULL!	#NULL!	1	65	1	1	1	1	2	1	3	2	1	2	3	2	0	0	#NULL!	#NULL!	#NULL!	#NULL!	60	4	2	1	1	15.01	1	0	0	0	0	1	#NULL!	2	#NULL!	#NULL!
140	3	1	1	80.0209	0	#NULL!	80.0209	2	8.00209	2	1	62	1	0	1	1	2	1	4	2	0	1	4	2	1	1	#NULL!	2	1	2	65	5	3	1	2	19	1	0	0	2	0	3	1	1	#NULL!	1
141	4	2	1	23.3356	#NULL!	#NULL!	23.3356	1	2.33356	1	1	68	2	0	1	1	2	1	4	2	2	2	4	2	1	1	1	3	1	#NULL!	60	4	2	1	1	19.05	0	1	0	1	0	3	2		#NULL!	0
142	5	2	1	121.775	0	#NULL!	121.775	2	12.1775	2	1	68	2	1	1	1	2	1	4	2	0	1	4	2	1	1	1	#NULL!	#NULL!	2	60	4	2	1	1	64	0	#NULL!	#NULL!	#NULL!	#NULL!	#NULL!	#NULL!		0	1
143	2	1	1	125.1	#NULL!	#NULL!	125.1	2	4	1	1	66	2	0	0	1	2	2	3	2	1	2	3	2	1	1	1	4	1	2	60	4	2	1	1	53	0	0	0	0	1	#NULL!	#NULL!	1	#NULL!	0
144	4	2	1	35.1386	#NULL!	#NULL!	35.1386	2	3.51386	1	1	59	1	1	1	1	2	1	4	2	2	2	4	2	0	0	#NULL!	#NULL!	#NULL!	#NULL!	60	4	2	1	1	3.19	1	1	1	#NULL!	1	#NULL!	#NULL!		#NULL!	0
145	3	2	1	24.8704	0	#NULL!	24.8704	1	2.48704	1	1	64	1	1	1	1	2	2	4	2	0	1	4	2	1	1	#NULL!	2	1	2	66	5	3	1	2	94	0	0	1	1	1	#NULL!	#NULL!	1	#NULL!	0
146	4	1	1	128.3	#NULL!	#NULL!	128.3	2	12.83	2	1	60	1	1	1	1	2	1	4	2	3	2	4	2	0	0	#NULL!	#NULL!	#NULL!	#NULL!	60	4	2	1	1	8.57	1	0	0	0	1	#NULL!	#NULL!		#NULL!	1
147	3	1	1	28.0633	12.88	#NULL!	40.9433	2	4.09433	1	1	51	1	0	1	1	2	1	2	1	2	2	3	2	1	1	#NULL!	2	1	1	67	5	3	1	2	17	1	2	0	#NULL!	0	2	#NULL!	1	#NULL!	0
148	1	1	1	48.6179	12.05	#NULL!	60.6679	2	5	2	1	59	1	0	1	1	2	2	3	2	2	2	3	2	1	1	#NULL!	2	1	#NULL!	62	4	2	1	1	74	1	1	1	1	0	#NULL!	#NULL!	1	#NULL!	1
149	3	2	1	42.4837	5.19494	#NULL!	47.6786	2	4.76786	2	1	69	2	1	1	1	2	1	4	2	2	2	4	2	1	1	#NULL!	#NULL!	#NULL!	2	68	5	3	1	2	4	1	0	0	#NULL!	0	#NULL!	#NULL!	1	0	1
150	5	1	1	28.4865	0	#NULL!	28.4865	1	2.84865	1	1	68	2	#NULL!	1	1	2	2	3	2	0	1	3	2	1	1	1	#NULL!	#NULL!	#NULL!	64	5	3	1	2	8	1	#NULL!	#NULL!	#NULL!	#NULL!	#NULL!	#NULL!		#NULL!	0
151	3	1	1	18.4	0	#NULL!	18.4	1	6	2	1	55	1	0	1	1	2	1	3	2	0	1	2	1	1	1	#NULL!	#NULL!	#NULL!	2	69	5	3	1	2	10	1	2	0	2	1	2	#NULL!	1	#NULL!	1
152	2	1	1	48.4881	0	#NULL!	48.4881	2	2	1	1	70	2	1	0	1	2	1	3	2	0	1	1	1	1	1	1	2	1	2	59	4	2	1	1	23	0	2	0	4	0	#NULL!	#NULL!	1	0	0
153	4	1	1	18.2688	#NULL!	#NULL!	18.2688	1	4	1	2	74	2	0	0	0	2	1	4	2	2	2	4	2	1	1	1	1	1	1	60	4	2	1	1	14.49	0	2	0	0	1	#NULL!	#NULL!		#NULL!	0
154	4	1	1	#NULL!	#NULL!	#NULL!	#NULL!	#NULL!	#NULL!	#NULL!	1	63	1	0	1	1	2	1	3	2	2	2	3	2	1	1	#NULL!	#NULL!	#NULL!	#NULL!	60	4	2	1	1	7.59	1	1	0	0	0	4	#NULL!	1	#NULL!	#NULL!
155	3	1	1	37.7315	0	#NULL!	37.7315	2	3.77315	1	1	59	1	1	1	1	2	1	4	2	0	1	3	2	1	1	#NULL!	2	1	1	70	5	3	1	2	40	1	2	0	1	0	2	#NULL!	1	#NULL!	0
156	3	2	1	12.0155	#NULL!	#NULL!	12.0155	1	2	1	1	55	1	0	1	1	2	1	4	2	1	2	4	2	1	1	#NULL!	#NULL!	#NULL!	2	50	1	1	0	#NULL!	24	1	0	0	#NULL!	0	3	1	2	#NULL!	0
157	2	1	1	#NULL!	#NULL!	#NULL!	12.6544	1	2.3	1	1	68	2	0	0	1	2	1	2	1	1	2	2	1	1	1	2	4	1	2	50	1	1	0	#NULL!	18	1	1	0	1	0	#NULL!	#NULL!	1	#NULL!	0
158	1	1	1	30.0696	1.66	#NULL!	31.7296	1	5	2	2	53	1	0	1	1	2	2	3	2	1	2	3	2	1	1	#NULL!	4	1	2	62	4	2	1	1	41	1	0	0	4	0	3	5	2	#NULL!	1
159	1	1	1	63.2244	#NULL!	#NULL!	63.2244	2	6	2	2	63	1	0	1	1	2	2	4	2	1	2	4	2	1	1	#NULL!	2	1	#NULL!	62	4	2	1	1	22	1	2	1	3	0	3	1	2	#NULL!	1
160	3	1	#NULL!	23.4525	2.65	#NULL!	26.1025	1	2.61025	1	1	55	1	0	1	1	2	1	4	2	2	2	4	2	1	1	#NULL!	4	1	#NULL!	50	1	1	0	#NULL!	11	1	0	0	2	1	2	2	1	0	0
161	1	1	#NULL!	8.7019	#NULL!	#NULL!	8.7019	1	8.1	2	1	52	1	0	1	1	2	2	4	2	1	2	4	2	1	1	#NULL!	6	2	#NULL!	60	4	2	1	1	39	0	1	0	2	0	#NULL!	#NULL!	1	#NULL!	1
162	3	1	#NULL!	67.438	14.23	#NULL!	81.668	2	8.1668	2	1	65	1	0	1	1	2	1	2	1	2	2	3	2	1	1	#NULL!	#NULL!	#NULL!	1	60	4	2	1	1	39	0	1	0	1	0	#NULL!	#NULL!	1	#NULL!	1
163	5	1	#NULL!	#NULL!	#NULL!	#NULL!	#NULL!	#NULL!	#NULL!	#NULL!	2	82	2	1	1	1	2	2	2	1	1	2	2	1	1	1	1	#NULL!	#NULL!	1	60	4	2	1	1	23	1	#NULL!	#NULL!	#NULL!	#NULL!	#NULL!	#NULL!		0	#NULL!
164	1	1	#NULL!	12.9488	0	#NULL!	12.9488	1	3	1	1	65	1	0	1	1	2	2	4	2	0	1	2	1	1	1	#NULL!	3	1	2	63	4	3	1	2	46	0	2	0	3	0	#NULL!	#NULL!	1	#NULL!	0
165	1	1	#NULL!	133.773	8.06294	#NULL!	141.836	2	8	2	1	58	1	0	1	1	2	2	4	2	1	2	4	2	1	1	#NULL!	2	1	2	62	4	2	1	1	45	1	1	0	3	1	3	2	1	#NULL!	1
166	1	1	2	7.8959	69.97	#NULL!	77.8659	2	5	2	2	73	2	0	1	1	2	2	4	2	1	2	4	2	1	1	#NULL!	2	1	1	60	4	2	1	1	9	1	0	0	1	1	#NULL!	#NULL!	1	#NULL!	1
167	4	1	2	#NULL!	#NULL!	#NULL!	#NULL!	#NULL!	#NULL!	#NULL!	2	70	2	0	0	0	2	1	3	2	2	2	3	2	1	1	#NULL!	#NULL!	#NULL!	2	60	4	2	1	1	19.25	0	2	0	2	1	3	1		#NULL!	#NULL!
168	1	1	1	22.2	0	#NULL!	22.2	1	6	2	2	78	2	0	1	1	2	2	3	2	0	1	2	1	1	1	#NULL!	0	#NULL!	2	63	4	3	1	2	11	1	0	0	0	1	3	4	1	#NULL!	1
169	3	2	2	131.1	11.35	#NULL!	142.45	2	14.245	2	1	60	1	0	1	1	2	1	3	2	2	2	3	2	1	1	#NULL!	#NULL!	#NULL!	2	60	4	2	1	1	33	0	0	0	2	1	#NULL!	#NULL!	1	#NULL!	1
170	4	1	2	#NULL!	#NULL!	#NULL!	#NULL!	#NULL!	#NULL!	#NULL!	1	59	1	0	1	1	2	1	3	2	1	2	3	2	1	1	1	2	1	#NULL!	60	4	2	1	1	26.25	1	1	0	4	1	#NULL!	#NULL!		#NULL!	#NULL!
171	5	1	2	22.6712	#NULL!	#NULL!	22.6712	1	2.26712	1	1	71	2	#NULL!	1	1	2	2	4	2	1	2	4	2	1	1	1	#NULL!	#NULL!	#NULL!	66	5	3	1	2	28	1	#NULL!	#NULL!	#NULL!	#NULL!	#NULL!	#NULL!		0	0
172	3	2	2	23.4	0	#NULL!	23.4	1	2.34	1	1	68	2	0	1	1	2	1	3	2	0	1	3	2	1	1	#NULL!	#NULL!	#NULL!	#NULL!	56	3	1	0	#NULL!	4	1	0	0	3	1	#NULL!	#NULL!	1	0	0
173	4	1	2	105.943	#NULL!	#NULL!	105.943	2	10.5943	2	1	65	1	1	1	1	2	1	2	1	2	2	3	2	1	1	1	2	1	2	54	2	1	0	#NULL!	33	0	2	0	0	1	#NULL!	#NULL!	1	#NULL!	1
174	2	1	2	17	0	#NULL!	17	1	3	1	2	70	2	1	0	1	2	1	3	2	0	1	1	1	1	1	1	4	1	#NULL!	60	4	2	1	1	15	1	0	0	2	0	#NULL!	#NULL!	2	#NULL!	0
175	2	1	2	60.3603	#NULL!	#NULL!	60.3603	2	5	2	2	69	2	1	0	1	2	2	3	2	2	2	3	2	1	1	1	4	1	2	62	4	2	1	1	14	1	1	0	0	1	#NULL!	#NULL!		#NULL!	1
176	3	2	2	29.8732	#NULL!	#NULL!	29.8732	1	2.98732	1	1	65	1	1	1	1	2	1	2	1	1	2	2	1	1	1	#NULL!	#NULL!	#NULL!	2	60	4	2	1	1	41	1	0	0	2	1	#NULL!	#NULL!	2	#NULL!	0
177	3	1	2	18.9	86.9	#NULL!	105.8	2	10.58	2	1	55	1	0	1	1	2	1	2	1	2	2	3	2	1	1	#NULL!	#NULL!	#NULL!	#NULL!	60	4	2	1	1	37	0	1	0	#NULL!	0	#NULL!	#NULL!	2	#NULL!	1
178	1	1	1	22.6531	0	#NULL!	22.6531	1	5	2	2	79	2	0	1	1	2	2	3	2	0	1	2	1	0	0	#NULL!	0	#NULL!	#NULL!	63	4	3	1	2	71	0	1	0	2	0	#NULL!	#NULL!	1	#NULL!	1
179	2	1	2	20.5172	#NULL!	#NULL!	20.5172	1	4.5	2	1	45	1	0	0	1	2	2	3	2	2	2	3	2	1	1	1	2	1	2	66	5	3	1	2	10	1	1	0	0	0	#NULL!	#NULL!	2	#NULL!	1
180	4	1	2	31.5169	#NULL!	#NULL!	31.5169	1	3.15169	1	1	59	1	0	1	1	2	1	4	2	2	2	4	2	1	1	1	1	1	#NULL!	65	5	3	1	2	10.81	1	2	2	2	1	#NULL!	#NULL!	1	#NULL!	0
181	3	1	2	4.8	0	#NULL!	4.8	1	2	1	1	62	1	1	1	1	2	1	2	1	0	1	1	1	1	1	#NULL!	#NULL!	#NULL!	2	54	2	1	0	#NULL!	68	0	0	0	2	0	#NULL!	#NULL!	1	#NULL!	0
182	4	2	2	86	#NULL!	#NULL!	86	2	8.6	2	1	52	1	0	0	0	2	1	4	2	2	2	4	2	1	1	1	1	1	#NULL!	54	2	1	0	#NULL!	6.01	0	2	0	1	1	#NULL!	#NULL!		#NULL!	1
183	4	1	2	#NULL!	#NULL!	#NULL!	#NULL!	#NULL!	#NULL!	#NULL!	1	63	1	1	0	0	2	1	3	2	2	2	3	2	1	1	#NULL!	#NULL!	#NULL!	2	60	4	2	1	1	20.76	1	1	0	1	1	#NULL!	#NULL!		#NULL!	#NULL!
184	4	1	2	#NULL!	#NULL!	#NULL!	#NULL!	#NULL!	#NULL!	#NULL!	2	52	1	1	0	0	2	1	3	2	1	2	3	2	1	1	1	5	2	2	66	5	3	1	2	21.36	1	2	0	2	1	3	1	1	#NULL!	#NULL!
185	2	1	2	43.9647	#NULL!	#NULL!	43.9647	2	5	2	1	51	1	0	0	1	2	1	4	2	1	2	3	2	1	1	2	2	1	#NULL!	60	4	2	1	1	16	1	0	0	0	0	#NULL!	#NULL!	2	#NULL!	1
186	3	1	2	31.6032	0	#NULL!	31.6032	1	3.16032	1	1	61	1	0	1	1	2	1	3	2	0	1	2	1	1	1	#NULL!	#NULL!	#NULL!	1	60	4	2	1	1	23	1	1	0	#NULL!	0	#NULL!	2	1	#NULL!	0
187	3	1	2	52.2345	0	#NULL!	52.2345	2	5.22345	2	1	59	1	0	1	1	2	1	2	1	0	1	2	1	1	1	#NULL!	2	1	#NULL!	60	4	2	1	1	89	1	1	0	1	1	#NULL!	#NULL!	1	#NULL!	1
188	4	2	2	53.9	0	#NULL!	53.9	2	5.39	2	2	74	2	1	0	0	2	1	2	1	0	1	2	1	1	1	1	1	1	1	50	1	1	0	#NULL!	22	0	2	0	0	0	#NULL!	#NULL!		#NULL!	1
189	1	2	2	47.4	5.31	#NULL!	52.71	2	8	2	1	51	1	0	1	1	2	2	2	1	1	1	2	1	1	1	#NULL!	2	1	2	62	4	2	1	1	98	0	0	0	4	0	3	1	1	#NULL!	1
190	1	2	2	5.5733	0	#NULL!	5.5733	1	2	1	1	61	1	0	1	1	2	2	3	2	0	1	2	1	1	1	#NULL!	3	1	2	62	4	2	1	1	64	0	1	0	3	0	#NULL!	#NULL!	1	#NULL!	0
191	3	1	2	37.9023	0	#NULL!	37.9023	2	3.79023	1	1	62	1	0	1	1	2	1	4	2	0	1	4	2	1	1	#NULL!	#NULL!	#NULL!	2	60	4	2	1	1	41	1	1	0	1	1	#NULL!	#NULL!	1	#NULL!	0
192	3	1	2	27.8326	3.56	#NULL!	31.3926	1	3.13926	1	1	63	1	0	1	1	2	1	2	1	1	2	3	2	1	1	#NULL!	#NULL!	#NULL!	1	63	4	3	1	2	19	1	1	0	2	0	#NULL!	#NULL!	1	#NULL!	0
193	3	1	2	4.2393	0	#NULL!	4.2393	1	2	1	1	62	1	0	1	1	2	1	2	1	0	1	2	1	1	1	#NULL!	#NULL!	#NULL!	#NULL!	59	4	2	1	1	51	1	3	0	2	1	#NULL!	#NULL!	1	#NULL!	0
194	4	1	#NULL!	#NULL!	#NULL!	#NULL!	#NULL!	#NULL!	#NULL!	#NULL!	1	76	2	1	1	1	2	1	3	2	1	2	3	2	1	1	1	1	1	1	60	4	2	1	1	41.92	0	1	0	1	0	2	#NULL!	1	#NULL!	#NULL!
195	1	1	2	34.6679	#NULL!	#NULL!	34.6679	1	4	1	1	68	2	0	1	1	2	1	4	2	1	2	3	2	1	1	#NULL!	2	1	2	60	4	2	1	1	9	1	1	0	2	1	#NULL!	1	2	#NULL!	0
196	5	2	2	62.9979	0	#NULL!	62.9979	2	6.29979	2	2	64	1	0	1	1	2	1	3	2	0	1	3	2	1	1	1	#NULL!	#NULL!	2	50	1	1	0	#NULL!	55	0	#NULL!	#NULL!	#NULL!	#NULL!	#NULL!	#NULL!		0	1
197	4	1	2	45.3737	#NULL!	#NULL!	45.3737	2	4.53737	2	1	64	1	1	1	1	2	1	4	2	2	2	4	2	1	1	1	2	1	1	60	4	2	1	1	11.63	1	0	0	0	0	2	#NULL!	1	#NULL!	1
198	5	1	2	#NULL!	#NULL!	#NULL!	70.0188	2	4	1	1	59	1	1	1	1	2	1	2	1	1	2	2	1	1	1	1	#NULL!	#NULL!	1	60	4	2	1	1	28	0	#NULL!	#NULL!	#NULL!	#NULL!	#NULL!	#NULL!		0	0
199	3	1	2	24.5824	0	#NULL!	24.5824	1	2.45824	1	1	54	1	1	1	1	2	1	4	2	0	1	3	2	0	0	#NULL!	#NULL!	#NULL!	#NULL!	60	4	2	1	1	7	1	0	0	#NULL!	0	3	3		0	0
200	5	1	#NULL!	#NULL!	#NULL!	#NULL!	#NULL!	#NULL!	#NULL!	#NULL!	1	76	2	0	1	1	2	1	2	1	0	1	2	1	1	1	1	#NULL!	#NULL!	1	60	4	2	1	1	7	1	#NULL!	#NULL!	#NULL!	#NULL!	#NULL!	#NULL!		#NULL!	#NULL!
201	4	2	2	#NULL!	#NULL!	#NULL!	#NULL!	#NULL!	#NULL!	#NULL!	2	66	2	0	0	0	2	1	3	2	1	2	3	2	1	1	1	5	2	2	60	4	2	1	1	50.79	0	1	0	2	0	#NULL!	#NULL!	1	#NULL!	#NULL!
202	5	1	2	31.1	0	#NULL!	31.1	1	3.11	1	1	68	2	0	1	1	2	1	3	2	0	1	3	2	1	1	1	#NULL!	#NULL!	2	60	4	2	1	1	75	0	#NULL!	#NULL!	#NULL!	#NULL!	#NULL!	#NULL!		0	0
203	5	1	1	11.6325	0	#NULL!	11.6325	1	3	1	1	78	2	0	1	1	2	1	3	2	0	1	3	2	1	1	1	#NULL!	#NULL!	1	60	4	2	1	1	58	0	#NULL!	#NULL!	#NULL!	#NULL!	#NULL!	#NULL!		0	0
204	4	2	2	#NULL!	#NULL!	#NULL!	#NULL!	#NULL!	#NULL!	#NULL!	1	74	2	1	1	1	2	1	3	2	2	2	4	2	0	0	#NULL!	#NULL!	#NULL!	#NULL!	60	4	2	1	1	11.02	1	2	0	1	0	1	#NULL!	1	#NULL!	#NULL!
205	4	1	2	#NULL!	#NULL!	#NULL!	#NULL!	#NULL!	#NULL!	#NULL!	1	55	1	1	1	1	2	1	3	2	2	2	4	2	1	1	#NULL!	#NULL!	#NULL!	2	60	4	2	1	1	11.7	1	1	0	0	0	3	1	2	#NULL!	#NULL!
206	3	1	2	#NULL!	#NULL!	#NULL!	78	2	6	2	1	53	1	0	1	1	2	1	1	1	2	2	2	1	1	1	#NULL!	2	1	2	66	5	3	1	2	16	1	0	0	#NULL!	0	#NULL!	#NULL!	1	#NULL!	1
207	4	1	2	11.8	15.21	#NULL!	27.01	1	2.701	1	2	60	1	0	0	0	2	1	2	1	1	2	2	1	1	1	1	5	2	#NULL!	60	4	2	1	1	74.97	0	1	0	2	1	#NULL!	#NULL!	2	#NULL!	0
208	2	1	2	8.2683	#NULL!	#NULL!	8.2683	1	6	2	1	61	1	1	1	1	2	1	3	2	1	2	3	2	1	1	1	5	2	#NULL!	60	4	2	1	1	57	0	0	0	1	0	#NULL!	#NULL!	1	#NULL!	1
209	4	1	2	26.3353	9.66	#NULL!	35.9953	2	3.59953	1	2	65	1	1	0	0	2	1	4	2	1	2	4	2	1	1	1	2	1	#NULL!	60	4	2	1	1	37.09	0	0	0	1	0	#NULL!	#NULL!	2	#NULL!	0
210	3	1	2	39.3015	0	#NULL!	39.3015	2	3.93015	1	1	71	2	1	1	1	2	1	4	2	0	1	4	2	1	1	#NULL!	#NULL!	#NULL!	2	54	2	1	0	#NULL!	46	1	0	0	2	0	#NULL!	#NULL!	1	#NULL!	0
211	3	2	2	19.2247	2.76	#NULL!	21.9847	1	2.19847	1	1	57	1	0	1	1	2	1	4	2	2	2	4	2	1	1	#NULL!	1	1	#NULL!	60	4	2	1	1	50	1	0	0	#NULL!	1	1	#NULL!		#NULL!	0
212	2	1	2	#NULL!	#NULL!	#NULL!	#NULL!	#NULL!	6	2	2	68	2	1	0	1	2	2	2	1	1	2	2	1	1	1	1	6	2	#NULL!	66	5	3	1	2	57	0	0	0	3	1	#NULL!	#NULL!	1	0	1
213	1	1	2	17.847	0	#NULL!	17.847	1	4	1	1	53	1	0	1	1	2	2	2	1	0	1	2	1	1	1	#NULL!	5	2	#NULL!	62	4	2	1	1	86	0	0	0	3	1	4	#NULL!	1	#NULL!	0
214	4	2	2	9.0091	3.46	#NULL!	12.4691	1	2	1	1	53	1	1	1	1	2	1	4	2	1	2	4	2	0	0	#NULL!	#NULL!	#NULL!	#NULL!	60	4	2	1	1	4.11	0	1	0	1	1	#NULL!	#NULL!	1	#NULL!	0
215	1	2	2	44.2612	#NULL!	#NULL!	44.2612	2	6	2	1	59	1	0	1	1	2	1	4	2	2	2	4	2	1	1	#NULL!	0	#NULL!	1	60	4	2	1	1	5	1	1	1	0	0	#NULL!	#NULL!	2	#NULL!	1
216	5	1	2	9.5301	#NULL!	#NULL!	9.5301	1	5	2	1	72	2	#NULL!	1	1	2	2	3	2	1	2	3	2	1	1	1	#NULL!	#NULL!	2	64	5	3	1	2	81	0	#NULL!	#NULL!	#NULL!	#NULL!	#NULL!	#NULL!		0	1
217	5	1	2	23.992	4.16	#NULL!	28.152	1	2.8152	1	1	56	1	0	1	1	2	1	4	2	1	2	4	2	1	1	1	#NULL!	#NULL!	#NULL!	60	4	2	1	1	12	1	#NULL!	#NULL!	#NULL!	#NULL!	#NULL!	#NULL!		#NULL!	0
218	3	1	2	28.1828	0	#NULL!	28.1828	1	2.81828	1	1	66	2	0	1	1	2	1	1	1	0	1	1	1	1	1	#NULL!	#NULL!	#NULL!	#NULL!	60	4	2	1	1	40	0	0	0	4	0	#NULL!	#NULL!	2	#NULL!	0
219	4	2	2	#NULL!	#NULL!	#NULL!	#NULL!	#NULL!	#NULL!	#NULL!	1	55	1	1	1	1	2	1	3	2	1	2	3	2	0	0	#NULL!	#NULL!	#NULL!	#NULL!	66	5	3	1	2	3.75	1	2	0	0	1	#NULL!	#NULL!		#NULL!	#NULL!
220	4	1	2	87.5567	#NULL!	#NULL!	87.5567	2	8.75567	2	1	69	2	0	1	0	2	1	4	2	1	2	4	2	1	1	#NULL!	#NULL!	#NULL!	2	60	4	2	1	1	12.75	1	1	0	0	1	1	#NULL!	1	#NULL!	1
221	4	2	2	#NULL!	#NULL!	#NULL!	#NULL!	#NULL!	#NULL!	#NULL!	1	71	2	0	1	1	2	1	3	2	2	2	4	2	1	1	1	1	1	#NULL!	50	1	1	0	#NULL!	4.37	0	2	0	2	1	#NULL!	#NULL!		#NULL!	#NULL!
222	2	1	2	37.8209	#NULL!	#NULL!	37.8209	2	5	2	2	62	1	1	0	1	2	1	3	2	2	2	3	2	1	1	1	4	1	1	60	4	2	1	1	45	0	1	0	3	0	#NULL!	#NULL!	1	0	1
223	1	1	2	238.986	#NULL!	#NULL!	238.986	2	10	2	1	48	1	0	1	1	2	1	3	2	3	2	4	2	1	1	#NULL!	2	1	#NULL!	56	3	1	0	#NULL!	12	1	1	2	1	0	#NULL!	#NULL!	1	#NULL!	1
224	3	1	1	22.0747	8.14	#NULL!	30.2147	1	3.02147	1	1	78	2	0	1	1	2	1	2	1	2	2	3	2	1	1	#NULL!	#NULL!	#NULL!	1	60	4	2	1	1	17	1	#NULL!	#NULL!	2	#NULL!	2	#NULL!		#NULL!	0
225	3	1	2	11.1932	#NULL!	#NULL!	11.1932	1	6	2	1	51	1	1	1	1	2	1	2	1	1	2	2	1	1	1	#NULL!	4	1	#NULL!	54	2	1	0	#NULL!	24	1	0	0	#NULL!	0	4	#NULL!	1	#NULL!	1
226	3	2	2	38.2751	34.2	#NULL!	72.4751	2	7.24751	2	1	59	1	1	1	1	2	1	4	2	2	2	4	2	1	1	#NULL!	#NULL!	#NULL!	2	52	2	1	0	#NULL!	30	1	2	0	#NULL!	1	3	1		#NULL!	1
227	5	1	2	59.1519	#NULL!	#NULL!	59.1519	2	5.91519	2	2	69	2	0	1	1	2	1	3	2	1	2	3	2	1	1	1	#NULL!	#NULL!	#NULL!	50	1	1	0	#NULL!	8	0	1	#NULL!	#NULL!	0	#NULL!	#NULL!		0	1
228	4	1	2	#NULL!	#NULL!	#NULL!	#NULL!	#NULL!	#NULL!	#NULL!	1	74	2	0	1	1	2	1	3	2	1	2	3	2	1	1	#NULL!	#NULL!	#NULL!	2	50	1	1	0	#NULL!	33.54	0	1	0	0	0	2	1	2	#NULL!	#NULL!
229	4	1	2	#NULL!	#NULL!	#NULL!	#NULL!	#NULL!	#NULL!	#NULL!	1	56	1	0	1	1	2	1	3	2	0	1	2	1	1	1	1	1	1	2	50	1	1	0	#NULL!	11.07	0	3	0	0	0	#NULL!	#NULL!	2	#NULL!	#NULL!
230	2	1	2	47.088	#NULL!	#NULL!	47.088	2	4	1	1	62	1	0	0	1	2	1	3	2	2	2	3	2	1	1	1	6	2	#NULL!	60	4	2	1	1	17	0	0	0	3	0	#NULL!	#NULL!	1	0	0
231	3	2	2	44.7911	15.06	#NULL!	59.8511	2	5.98511	2	1	57	1	0	1	1	2	1	4	2	2	2	4	2	0	0	#NULL!	#NULL!	#NULL!	#NULL!	55	3	1	0	#NULL!	1	1	0	0	#NULL!	0	#NULL!	#NULL!		0	1
232	3	2	2	56.7374	0	#NULL!	56.7374	2	5.67374	2	1	71	2	0	1	1	2	1	4	2	0	1	4	2	1	1	#NULL!	#NULL!	#NULL!	2	60	4	2	1	1	17	1	2	0	#NULL!	0	#NULL!	2		#NULL!	1
233	3	2	2	51.9848	21.1491	#NULL!	73.1339	2	7.31339	2	1	39	1	0	1	1	2	1	4	2	1	2	4	2	1	1	#NULL!	5	2	2	60	4	2	1	1	83	1	2	0	#NULL!	1	#NULL!	#NULL!	1	#NULL!	1
234	1	2	2	8.2656	0	#NULL!	8.2656	1	4	1	2	57	1	0	1	1	2	2	2	1	0	1	2	1	1	1	#NULL!	0	#NULL!	1	62	4	2	1	1	67	1	0	0	0	1	3	2	1	#NULL!	0
235	4	2	2	39.4232	4.23	#NULL!	43.6532	2	4.36532	2	1	62	1	0	1	1	2	1	4	2	1	2	4	2	1	1	1	5	2	2	48	1	1	0	#NULL!	3.78	1	1	0	2	1	#NULL!	#NULL!	2	#NULL!	1
236	1	2	2	35.7243	#NULL!	#NULL!	35.7243	2	5	2	1	68	2	0	1	1	2	2	4	2	1	2	4	2	1	1	#NULL!	4	1	#NULL!	62	4	2	1	1	9	1	0	0	3	1	#NULL!	#NULL!	2	#NULL!	1
237	1	2	2	13.441	2.03	#NULL!	15.471	1	3	1	2	65	1	0	1	1	2	1	2	1	1	2	2	1	1	1	#NULL!	4	1	2	60	4	2	1	1	73	1	0	0	2	1	3	1	1	#NULL!	0
238	1	2	2	28.1	3.15	#NULL!	31.25	1	3	1	1	50	1	0	1	1	2	2	2	1	1	2	2	1	1	1	#NULL!	3	1	#NULL!	63	4	3	1	2	9	1	0	0	3	0	1	#NULL!	1	#NULL!	0
239	4	2	2	38.3186	#NULL!	#NULL!	38.3186	2	3.83186	1	2	63	1	1	0	0	2	1	4	2	2	2	4	2	1	1	1	1	1	1	50	1	1	0	#NULL!	6.44	0	1	0	0	0	#NULL!	#NULL!	2	#NULL!	0
240	4	2	2	18.3037	#NULL!	#NULL!	18.3037	1	4	1	1	65	1	1	1	1	2	1	4	2	2	2	4	2	1	1	1	1	1	1	60	4	2	1	1	10.22	0	1	0	0	0	#NULL!	#NULL!		#NULL!	0
241	1	2	2	29.1732	0	#NULL!	29.1732	1	3	1	1	69	2	0	1	1	2	2	4	2	0	1	4	2	1	1	#NULL!	4	1	1	62	4	2	1	1	68	0	2	0	3	1	#NULL!	#NULL!	1	#NULL!	0
242	3	2	2	24.4858	1.69	#NULL!	26.1758	1	2.61758	1	1	56	1	1	1	1	2	1	3	2	1	2	3	2	1	1	#NULL!	#NULL!	#NULL!	#NULL!	64	5	3	1	2	84	1	0	0	#NULL!	1	#NULL!	#NULL!	2	#NULL!	0
243	1	2	2	57.4939	0	#NULL!	57.4939	2	7	2	2	62	1	0	1	1	2	2	4	2	0	1	4	2	1	1	#NULL!	3	1	#NULL!	63	4	3	1	2	43	1	2	1	2	1	#NULL!	#NULL!	1	#NULL!	1
244	3	2	2	33.8489	0	#NULL!	33.8489	1	3.38489	1	1	62	1	0	1	1	2	1	1	1	0	1	1	1	1	1	#NULL!	4	1	1	56	3	1	0	#NULL!	32	1	0	#NULL!	#NULL!	1	2	#NULL!	1	#NULL!	0
245	4	2	2	#NULL!	#NULL!	#NULL!	#NULL!	#NULL!	#NULL!	#NULL!	1	57	1	0	1	1	2	1	3	2	2	2	3	2	0	0	#NULL!	#NULL!	#NULL!	#NULL!	60	4	2	1	1	49.37	1	1	0	0	1	1	1		#NULL!	#NULL!
246	3	2	2	41.9	0	#NULL!	41.9	2	4.19	1	1	53	1	0	1	1	2	1	2	1	0	1	3	2	1	1	#NULL!	#NULL!	#NULL!	2	60	4	2	1	1	28	1	1	0	2	0	#NULL!	#NULL!	1	#NULL!	0
247	2	2	2	99.2224	27.6644	#NULL!	126.887	2	3	1	1	65	1	0	1	1	2	2	3	2	1	2	3	2	1	1	1	2	1	1	66	5	3	1	2	47	0	0	0	0	0	#NULL!	#NULL!	1	0	0
248	1	2	2	11.9172	0	#NULL!	11.9172	1	2	1	1	61	1	0	1	1	2	2	2	1	0	1	2	1	1	1	#NULL!	4	1	2	62	4	2	1	1	53	0	0	1	2	0	#NULL!	#NULL!	1	#NULL!	0
249	3	2	2	62.65	3.14323	#NULL!	65.7932	2	6.57932	2	1	57	1	1	1	1	2	1	1	1	2	1	2	1	1	1	#NULL!	#NULL!	#NULL!	2	60	4	2	1	1	105	1	0	0	#NULL!	1	1	#NULL!		#NULL!	1
250	4	2	2	43.995	#NULL!	#NULL!	43.995	2	4.3995	2	1	70	2	0	0	0	2	1	4	2	2	2	4	2	1	1	#NULL!	#NULL!	#NULL!	2	60	4	2	1	1	48.1	0	2	0	1	0	#NULL!	#NULL!	1	#NULL!	1
251	4	2	#NULL!	#NULL!	#NULL!	#NULL!	#NULL!	#NULL!	#NULL!	#NULL!	2	83	2	1	0	0	2	1	3	2	2	2	3	2	1	1	#NULL!	#NULL!	#NULL!	2	54	2	1	0	#NULL!	37.55	0	2	0	0	1	#NULL!	#NULL!		#NULL!	#NULL!
252	3	2	2	33.2338	0	#NULL!	33.2338	1	3.32339	1	1	56	1	1	1	1	2	1	3	2	0	1	2	1	1	1	#NULL!	2	1	2	60	4	2	1	1	104	0	2	1	1	0	#NULL!	#NULL!	2	#NULL!	0
253	5	2	2	#NULL!	#NULL!	#NULL!	#NULL!	#NULL!	#NULL!	#NULL!	1	55	1	0	1	1	2	1	2	1	1	2	2	1	1	1	1	#NULL!	#NULL!	1	60	4	2	1	1	28	0	#NULL!	#NULL!	#NULL!	#NULL!	#NULL!	#NULL!		0	#NULL!
254	1	2	2	24.0396	#NULL!	#NULL!	24.0396	1	3	1	1	58	1	0	1	1	2	2	4	2	1	2	4	2	1	1	#NULL!	4	1	#NULL!	63	4	3	1	2	22	0	2	0	0	0	#NULL!	#NULL!	2	#NULL!	0
255	1	2	2	19.7875	0	#NULL!	19.7875	1	4	1	2	55	1	0	1	1	2	1	4	2	0	1	4	2	1	1	#NULL!	2	1	#NULL!	60	4	2	1	1	27	0	2	0	3	1	#NULL!	#NULL!	1	#NULL!	0
256	1	2	2	33.7386	6.40019	#NULL!	40.1388	2	7	2	1	53	1	0	1	1	2	2	3	2	2	1	3	2	1	1	#NULL!	4	1	2	64	5	3	1	2	76	1	0	0	1	0	#NULL!	#NULL!	1	#NULL!	1
257	1	2	2	59.4295	2.18	#NULL!	61.6095	2	6	2	2	56	1	0	1	1	2	2	4	2	1	2	3	2	1	1	#NULL!	4	1	2	62	4	2	1	1	10	1	1	0	3	0	#NULL!	#NULL!	1	#NULL!	1
258	5	2	2	136.69	0	#NULL!	136.69	2	13.669	2	2	59	1	#NULL!	1	1	2	2	4	2	0	1	2	1	1	1	1	#NULL!	#NULL!	1	64	5	3	1	2	80	0	#NULL!	#NULL!	#NULL!	#NULL!	#NULL!	#NULL!		0	1
259	1	2	2	13.8764	0	#NULL!	13.8764	1	3	1	2	68	2	0	1	1	2	2	3	2	0	1	2	1	1	1	#NULL!	2	1	#NULL!	62	4	2	1	1	21	1	1	0	3	0	3	5	1	#NULL!	0
260	1	2	2	43.4	13.9213	#NULL!	57.3213	2	11.5	2	1	70	2	0	1	1	2	2	4	2	2	2	4	2	1	1	#NULL!	2	1	2	63	4	3	1	2	18	1	2	0	2	0	3	1	1	#NULL!	1
261	4	2	2	46.5298	#NULL!	#NULL!	46.5298	2	4.65298	2	1	54	1	1	1	1	2	1	4	2	2	2	4	2	1	1	#NULL!	#NULL!	#NULL!	2	50	1	1	0	#NULL!	4.47	1	1	0	1	0	#NULL!	#NULL!	2	#NULL!	1
262	1	2	2	21.8	0	#NULL!	21.8	1	4	1	1	62	1	0	1	1	2	2	3	2	0	1	2	1	1	1	#NULL!	0	#NULL!	2	62	4	2	1	1	95	1	0	0	0	0	#NULL!	#NULL!	1	#NULL!	0
263	1	2	2	22.2282	0	#NULL!	22.2282	1	4	1	1	59	1	0	1	1	2	2	4	2	0	1	4	2	1	1	#NULL!	2	1	2	62	4	2	1	1	19	1	0	0	2	0	1	#NULL!	1	#NULL!	0
264	3	2	2	50.3262	3.57056	#NULL!	53.8968	2	5.38968	2	1	51	1	0	1	1	2	1	3	2	1	2	3	2	1	1	#NULL!	1	1	2	48	1	1	0	#NULL!	52	1	2	#NULL!	#NULL!	1	3	1		#NULL!	1
265	1	2	2	8.3119	#NULL!	#NULL!	8.3119	1	4	1	1	60	1	0	1	1	2	2	3	2	1	2	3	2	1	1	#NULL!	3	1	2	65	5	3	1	2	21	1	1	1	2	0	3	1	2	#NULL!	0
266	1	2	#NULL!	126.994	2.68	#NULL!	129.674	2	8	2	2	83	2	0	1	1	2	1	4	2	2	2	4	2	0	0	#NULL!	0	#NULL!	#NULL!	60	4	2	1	1	46	0	0	0	0	0	#NULL!	#NULL!	1	#NULL!	1
267	1	2	2	46.368	0	#NULL!	46.368	2	5	2	1	70	2	0	1	1	2	1	3	2	0	1	2	1	1	1	#NULL!	1	#NULL!	2	60	4	2	1	1	28	1	2	0	1	0	#NULL!	#NULL!	2	#NULL!	1
268	3	2	2	66.3722	20.1111	#NULL!	86.4833	2	8.64833	2	1	66	2	0	1	1	2	1	2	2	3	2	4	2	1	1	#NULL!	#NULL!	#NULL!	2	60	4	2	1	1	4	1	1	0	#NULL!	1	#NULL!	#NULL!	2	0	1
269	1	2	2	32.9697	#NULL!	#NULL!	32.9697	1	4	1	1	52	1	0	1	1	2	1	4	2	2	2	4	2	1	1	#NULL!	2	1	2	60	4	2	1	1	7	1	0	0	0	1	1	#NULL!	1	#NULL!	0
270	1	2	2	34.3704	1.9	#NULL!	36.2704	2	5	2	1	53	1	0	1	1	2	2	4	2	1	2	4	2	1	1	#NULL!	4	1	#NULL!	62	4	2	1	1	81	0	1	0	2	1	1	#NULL!	1	#NULL!	1
271	4	2	2	44.6	#NULL!	#NULL!	44.6	2	4.46	2	2	69	2	1	0	0	2	1	2	1	2	2	3	2	0	0	#NULL!	#NULL!	#NULL!	#NULL!	60	4	2	1	1	30.32	0	1	0	0	1	#NULL!	#NULL!	1	#NULL!	1
272	1	2	2	48.4881	0	#NULL!	48.4881	2	4	1	2	58	1	0	1	1	2	1	3	2	0	1	2	1	1	1	#NULL!	2	1	2	60	4	2	1	1	8	1	1	0	4	1	1	#NULL!	1	#NULL!	0
273	1	2	2	19.3484	#NULL!	#NULL!	19.3484	1	5	2	2	62	1	0	1	1	2	1	4	2	2	2	4	2	1	1	#NULL!	0	#NULL!	2	59	4	2	1	1	19	1	2	0	2	0	4	#NULL!	2	#NULL!	1
274	1	2	2	17.4676	0	#NULL!	17.4676	1	5.7	2	1	65	1	0	1	1	2	2	3	2	0	1	2	1	1	1	#NULL!	3	1	#NULL!	63	4	3	1	2	26	0	1	1	4	0	3	1	1	#NULL!	1
275	1	2	2	37.5128	6.72	#NULL!	44.2328	2	4	1	1	51	1	0	1	1	2	2	4	2	2	2	4	2	1	1	#NULL!	2	1	#NULL!	62	4	2	1	1	18	1	0	0	2	0	1	#NULL!	1	#NULL!	0
276	4	2	2	#NULL!	#NULL!	#NULL!	#NULL!	#NULL!	#NULL!	#NULL!	2	65	1	1	0	0	2	1	3	2	1	2	3	2	1	1	1	4	1	#NULL!	60	4	2	1	1	56.71	0	2	0	2	1	#NULL!	#NULL!	1	#NULL!	#NULL!
277	4	2	2	55.6057	#NULL!	#NULL!	55.6057	2	5.56057	2	2	66	2	0	0	0	2	1	2	1	2	2	3	2	0	0	#NULL!	#NULL!	#NULL!	#NULL!	60	4	2	1	1	41.03	0	0	0	0	0	#NULL!	#NULL!		#NULL!	1
278	3	2	1	18.8224	8.54299	#NULL!	27.3654	1	2.73654	1	1	77	2	0	1	1	2	1	2	1	2	2	3	2	1	1	#NULL!	#NULL!	#NULL!	2	60	4	2	1	1	8	1	0	0	2	0	#NULL!	#NULL!	2	0	0
279	5	2	2	108.318	0	#NULL!	108.318	2	10.8318	2	1	67	2	0	1	1	2	1	4	2	0	1	4	2	1	1	1	#NULL!	#NULL!	2	60	4	2	1	1	87	0	#NULL!	#NULL!	#NULL!	#NULL!	#NULL!	#NULL!		0	1
280	5	2	2	#NULL!	#NULL!	#NULL!	#NULL!	#NULL!	#NULL!	#NULL!	2	71	2	0	1	1	2	1	2	1	0	1	2	1	1	1	1	#NULL!	#NULL!	2	60	4	2	1	1	25	0	#NULL!	#NULL!	#NULL!	#NULL!	#NULL!	#NULL!		0	#NULL!
281	4	2	2	56.0425	#NULL!	#NULL!	56.0425	2	5.60425	2	1	63	1	1	0	1	2	1	4	2	2	2	4	2	0	0	#NULL!	#NULL!	#NULL!	#NULL!	60	4	2	1	1	31.12	1	1	0	0	0	#NULL!	#NULL!	1	#NULL!	1
282	3	2	2	58.8218	10.15	#NULL!	68.9718	2	6.89718	2	1	74	2	1	1	1	2	1	4	2	2	2	4	2	0	0	#NULL!	#NULL!	#NULL!	#NULL!	60	4	2	1	1	92	1	0	0	1	0	#NULL!	#NULL!	2	#NULL!	1
283	4	2	2	9.1504	#NULL!	#NULL!	9.1504	1	2	1	1	72	2	1	1	1	2	1	4	2	2	2	4	2	0	0	#NULL!	#NULL!	#NULL!	#NULL!	54	2	1	0	#NULL!	4.4	1	2	0	0	0	#NULL!	#NULL!	1	#NULL!	0
284	3	2	2	#NULL!	#NULL!	#NULL!	#NULL!	#NULL!	#NULL!	#NULL!	1	64	1	0	1	1	2	1	2	1	2	2	3	2	1	1	#NULL!	#NULL!	#NULL!	#NULL!	60	4	2	1	1	10	1	3	0	3	1	1	#NULL!		#NULL!	#NULL!
285	3	2	2	31.8383	5.37	#NULL!	37.2083	2	3.72083	1	1	62	1	0	1	1	2	1	4	2	3	2	4	2	1	1	#NULL!	4	1	2	50	1	1	0	#NULL!	20	1	0	0	2	0	#NULL!	#NULL!	2	#NULL!	0
286	3	2	2	39.6444	2.90023	#NULL!	42.5446	2	4.25446	1	1	56	1	#NULL!	1	1	2	1	2	2	2	2	3	2	1	1	#NULL!	#NULL!	#NULL!	2	63	4	3	1	2	4	1	#NULL!	#NULL!	#NULL!	#NULL!	#NULL!	#NULL!	2	0	0
287	3	2	2	33.4237	5.22853	#NULL!	38.6522	2	3.86522	1	1	62	1	1	1	1	2	1	2	2	2	2	3	2	1	1	#NULL!	#NULL!	#NULL!	#NULL!	66	5	3	1	2	4	1	0	0	#NULL!	0	#NULL!	#NULL!	1	0	0
288	2	2	2	46.5304	#NULL!	#NULL!	46.5304	2	3	1	1	64	1	1	1	1	2	1	3	2	1	2	3	2	1	1	1	2	1	2	59	4	2	1	1	6	1	3	4	2	1	#NULL!	#NULL!	1	0	0
289	1	2	#NULL!	63.7016	#NULL!	#NULL!	63.7016	2	6	2	1	88	2	0	1	1	2	1	4	2	1	2	4	2	1	1	#NULL!	0	#NULL!	2	50	1	1	0	#NULL!	16	1	0	0	3	0	#NULL!	#NULL!	2	#NULL!	1
290	5	2	2	#NULL!	#NULL!	#NULL!	#NULL!	#NULL!	#NULL!	#NULL!	1	73	2	0	1	1	2	1	2	1	0	1	2	1	1	1	1	#NULL!	#NULL!	1	60	4	2	1	1	9	1	#NULL!	#NULL!	#NULL!	#NULL!	#NULL!	#NULL!		#NULL!	#NULL!
291	5	2	2	40.9122	#NULL!	#NULL!	40.9122	2	4.09122	1	2	72	2	0	1	1	2	1	3	2	1	2	3	2	1	1	1	#NULL!	#NULL!	2	60	4	2	1	1	6	0	3	#NULL!	#NULL!	0	#NULL!	#NULL!		0	0
292	3	2	2	7.4	8.70452	#NULL!	16.1045	1	2	1	1	70	2	0	1	1	2	1	2	1	2	2	3	2	1	1	#NULL!	#NULL!	#NULL!	2	50	1	1	0	#NULL!	122	0	0	0	#NULL!	0	#NULL!	#NULL!	2	#NULL!	0
293	4	2	2	85.6749	#NULL!	#NULL!	85.6749	2	8.56749	2	2	58	1	0	0	0	2	1	4	2	2	2	4	2	1	1	1	2	1	2	49	1	1	0	#NULL!	59.17	0	1	0	2	1	#NULL!	#NULL!	2	#NULL!	1
294	3	2	#NULL!	40.8	20.9	#NULL!	61.7	2	6.17	2	1	84	2	1	1	1	2	1	3	2	1	2	3	2	1	1	#NULL!	#NULL!	#NULL!	2	60	4	2	1	1	39	1	0	0	#NULL!	1	1	#NULL!	1	#NULL!	1
295	4	2	2	#NULL!	#NULL!	#NULL!	#NULL!	#NULL!	#NULL!	#NULL!	1	60	1	1	1	1	2	1	3	2	0	1	2	1	1	1	1	5	2	2	60	4	2	1	1	19.65	1	2	0	1	1	3	2	2	#NULL!	#NULL!
296	3	2	2	31.5	#NULL!	#NULL!	31.5	1	3.15	1	1	61	1	1	1	1	2	1	3	2	1	2	3	2	1	1	#NULL!	#NULL!	#NULL!	1	60	4	2	1	1	11	1	0	0	#NULL!	1	#NULL!	#NULL!	2	0	0
297	1	2	1	7.1482	0	#NULL!	7.1482	1	3	1	1	79	2	0	1	1	2	1	3	2	0	1	2	1	1	1	#NULL!	0	#NULL!	2	60	4	2	1	1	77	0	1	0	1	1	#NULL!	#NULL!	1	#NULL!	0
298	4	2	2	#NULL!	#NULL!	#NULL!	#NULL!	#NULL!	#NULL!	#NULL!	2	66	2	0	0	0	2	1	3	2	1	2	3	2	1	1	#NULL!	#NULL!	#NULL!	2	60	4	2	1	1	36.67	0	1	0	1	0	#NULL!	#NULL!	1	#NULL!	#NULL!
299	4	2	2	127.4	#NULL!	#NULL!	127.4	2	12.74	2	2	55	1	1	0	0	2	1	4	2	1	2	4	2	1	1	1	4	1	1	60	4	2	1	1	49.58	0	1	0	1	1	#NULL!	#NULL!	1	#NULL!	1
300	1	2	2	27.2415	#NULL!	#NULL!	27.2415	1	7	2	1	75	2	0	1	1	2	2	4	2	2	2	4	2	1	1	#NULL!	2	1	2	63	4	3	1	2	7	1	1	0	1	0	3	2	1	#NULL!	1
301	2	2	2	45.0564	0	#NULL!	45.0564	2	2	1	2	62	1	0	0	1	2	1	3	2	0	1	1	1	1	1	1	2	1	2	50	1	1	0	#NULL!	40	0	3	0	2	1	#NULL!	#NULL!	1	#NULL!	0
302	2	2	2	46.3779	19.38	#NULL!	65.7579	2	2	1	1	58	1	0	0	1	2	1	3	2	2	2	3	2	1	1	2	1	1	2	52	2	1	0	#NULL!	50	0	3	2	1	0	#NULL!	#NULL!	1	#NULL!	0
303	2	2	1	7.1482	13.16	#NULL!	20.3082	1	5	2	1	58	1	0	1	1	2	2	3	2	1	2	3	2	1	1	1	#NULL!	2	1	66	5	3	1	2	14	1	0	0	0	1	#NULL!	#NULL!	1	#NULL!	1
304	1	1	1	196.766	0	#NULL!	196.766	2	8	2	1	60	1	1	1	1	2	2	4	2	0	1	4	2	0	0	#NULL!	0	#NULL!	#NULL!	62	4	2	1	1	8	1	0	0	0	0	4	#NULL!	1	#NULL!	1
305	1	2	1	74.1393	11.77	#NULL!	85.9093	2	5	2	1	58	1	0	1	1	2	2	3	2	2	2	3	2	1	1	#NULL!	1	1	1	62	4	2	1	1	5	1	0	0	4	0	3	3	1	#NULL!	1
306	1	1	1	16.5725	0	#NULL!	16.5725	1	4.5	2	2	71	2	0	1	1	2	1	4	2	0	1	4	2	1	1	#NULL!	4	1	2	54	2	1	0	#NULL!	13	1	1	1	2	1	1	#NULL!	2	#NULL!	1
307	1	1	1	31.5124	#NULL!	#NULL!	31.5124	1	8	2	1	63	1	0	1	1	2	2	4	2	2	2	4	2	1	1	#NULL!	2	1	#NULL!	62	4	2	1	1	9	1	0	0	0	0	#NULL!	#NULL!	1	#NULL!	1
308	4	2	1	#NULL!	#NULL!	#NULL!	#NULL!	#NULL!	#NULL!	#NULL!	1	65	1	0	1	0	2	1	3	2	2	2	3	2	1	1	1	1	1	1	50	1	1	0	#NULL!	9.13	0	0	0	0	0	#NULL!	#NULL!	2	#NULL!	#NULL!
309	1	1	1	25.5756	#NULL!	#NULL!	25.5756	1	7	2	1	63	1	0	1	1	2	2	2	1	1	2	2	1	1	1	#NULL!	4	1	2	63	4	3	1	2	28	0	2	0	2	0	#NULL!	#NULL!	2	#NULL!	1
310	2	2	1	74.1393	#NULL!	#NULL!	74.1393	2	3	1	2	53	1	1	0	1	2	1	3	2	2	2	3	2	1	1	1	3	1	2	59	4	2	1	1	50	0	0	0	1	0	#NULL!	#NULL!	1	0	0
311	3	2	1	17.284	0	#NULL!	17.284	1	3	1	1	56	1	0	1	1	2	1	3	2	0	2	2	1	1	1	#NULL!	#NULL!	#NULL!	2	60	4	2	1	1	4	0	#NULL!	#NULL!	#NULL!	#NULL!	#NULL!	#NULL!	1	0	0
312	3	1	1	52.6	#NULL!	#NULL!	52.6	2	5.26	2	1	69	2	1	1	1	2	1	3	2	1	2	2	1	1	1	#NULL!	#NULL!	#NULL!	1	60	4	2	1	1	43	1	#NULL!	#NULL!	1	#NULL!	#NULL!	#NULL!	1	#NULL!	1
313	2	2	1	#NULL!	#NULL!	#NULL!	11	1	3	1	2	67	2	1	0	1	2	1	1	1	1	2	2	1	1	1	1	2	1	2	60	4	2	1	1	51	0	0	0	0	0	#NULL!	#NULL!	1	#NULL!	0
314	5	1	1	5.2	#NULL!	#NULL!	5.2	1	2	1	1	62	1	0	1	1	2	1	3	2	1	2	3	2	1	1	1	#NULL!	#NULL!	#NULL!	60	4	2	1	1	28	0	#NULL!	#NULL!	#NULL!	#NULL!	#NULL!	#NULL!		0	0
315	5	1	1	71.3896	#NULL!	#NULL!	71.3896	2	7.13896	2	1	70	2	#NULL!	1	1	2	2	4	2	2	2	4	2	1	1	1	#NULL!	#NULL!	2	66	5	3	1	2	11	1	#NULL!	#NULL!	#NULL!	#NULL!	#NULL!	#NULL!		#NULL!	1
316	5	2	1	#NULL!	#NULL!	#NULL!	#NULL!	#NULL!	#NULL!	#NULL!	1	60	1	1	1	1	2	1	2	1	0	1	2	1	1	1	1	#NULL!	#NULL!	1	50	1	1	0	#NULL!	56	0	#NULL!	#NULL!	#NULL!	#NULL!	#NULL!	#NULL!		0	#NULL!
317	1	1	1	64.4522	#NULL!	#NULL!	64.4522	2	6	2	1	66	2	0	1	1	2	1	4	2	1	2	4	2	1	1	#NULL!	5	2	#NULL!	50	1	1	0	#NULL!	23	1	2	3	3	1	3	#NULL!	1	#NULL!	1
318	5	1	1	59.7524	3.49389	#NULL!	63.2463	2	6.32463	2	1	63	1	#NULL!	1	1	2	2	4	2	1	2	4	2	1	1	1	#NULL!	#NULL!	2	64	5	3	1	2	46	0	#NULL!	#NULL!	#NULL!	#NULL!	#NULL!	#NULL!		0	1
319	2	2	1	28.4916	0	#NULL!	28.4916	1	6	2	1	73	2	1	1	1	2	1	3	2	0	1	1	1	1	1	1	#NULL!	#NULL!	1	54	2	1	0	#NULL!	2	0	2	0	0	0	#NULL!	#NULL!	1	0	1
320	5	1	1	37.595	1.97414	#NULL!	39.5691	2	3.95691	1	1	73	2	0	1	1	2	1	4	2	1	2	4	2	1	1	1	#NULL!	#NULL!	1	60	4	2	1	1	19.65	0	4	#NULL!	#NULL!	0	#NULL!	#NULL!		#NULL!	0
321	3	1	1	12.7928	9.711	#NULL!	22.5038	1	2.25038	1	1	52	1	0	1	1	2	1	2	1	2	2	2	1	1	1	#NULL!	#NULL!	#NULL!	#NULL!	60	4	2	1	1	50	0	#NULL!	#NULL!	#NULL!	#NULL!	3	2		#NULL!	0
322	4	2	1	#NULL!	#NULL!	#NULL!	#NULL!	#NULL!	#NULL!	#NULL!	2	64	1	0	0	0	2	1	3	2	1	2	3	2	1	1	1	2	1	1	50	1	1	0	#NULL!	35.48	0	1	0	0	1	#NULL!	#NULL!	1	0	#NULL!
323	1	1	1	80.9144	4.3	#NULL!	85.2144	2	6	2	1	59	1	0	1	1	2	2	2	1	1	2	2	1	1	1	#NULL!	3	1	2	63	4	3	1	2	61	0	1	0	4	1	#NULL!	#NULL!	1	#NULL!	1
324	4	1	1	#NULL!	#NULL!	#NULL!	#NULL!	#NULL!	#NULL!	#NULL!	1	63	1	1	1	1	2	1	3	2	2	2	3	2	1	1	1	5	2	1	60	4	2	1	1	5.32	0	1	0	1	1	#NULL!	1		#NULL!	#NULL!
325	3	2	1	24.8054	0	#NULL!	24.8054	1	2.48054	1	1	53	1	#NULL!	1	1	2	1	4	1	0	1	4	2	1	1	#NULL!	#NULL!	#NULL!	#NULL!	63	4	3	1	2	123	1	#NULL!	#NULL!	#NULL!	#NULL!	#NULL!	#NULL!	1	#NULL!	0
326	4	2	1	#NULL!	#NULL!	#NULL!	#NULL!	#NULL!	#NULL!	#NULL!	1	60	1	0	1	1	2	1	3	2	2	2	3	2	1	1	1	#NULL!	#NULL!	#NULL!	50	1	1	0	#NULL!	31	1	2	0	1	1	3	#NULL!		#NULL!	#NULL!
327	4	1	#NULL!	#NULL!	#NULL!	#NULL!	#NULL!	#NULL!	#NULL!	#NULL!	1	82	2	0	1	0	2	1	3	2	3	2	4	2	1	1	1	1	1	1	56	3	1	0	#NULL!	17.71	0	2	0	3	0	2	#NULL!		#NULL!	#NULL!
328	3	1	1	68.6308	0	#NULL!	68.6308	2	6.86308	2	1	56	1	0	1	1	2	1	3	2	0	1	3	2	1	1	#NULL!	3	1	2	60	4	2	1	1	104	0	1	0	1	0	#NULL!	#NULL!	1	#NULL!	1
329	3	2	1	48.9	#NULL!	#NULL!	48.9	2	4.89	2	1	35	1	0	1	1	2	1	3	1	1	2	2	1	1	1	#NULL!	2	1	1	58	3	1	0	#NULL!	118	0	0	0	#NULL!	0	#NULL!	#NULL!	1	#NULL!	1
330	3	1	1	65	0	#NULL!	65	2	6.5	2	1	66	2	0	1	1	2	1	3	2	0	1	2	1	1	1	#NULL!	#NULL!	#NULL!	2	60	4	2	1	1	45	0	0	0	#NULL!	1	1	#NULL!		#NULL!	1
331	3	2	1	#NULL!	#NULL!	#NULL!	14	1	3	#NULL!	1	55	1	0	1	1	2	1	2	1	1	2	2	1	1	1	#NULL!	#NULL!	#NULL!	2	58	3	1	0	#NULL!	5	1	0	0	#NULL!	1	2	#NULL!	1	#NULL!	#NULL!
332	4	1	1	58.5	#NULL!	#NULL!	58.5	2	5.85	2	1	61	1	1	1	1	2	1	4	2	2	2	4	2	0	0	#NULL!	#NULL!	#NULL!	#NULL!	60	4	2	1	1	7.62	1	2	0	0	1	1	#NULL!	2	#NULL!	1
333	4	1	1	4.4	#NULL!	#NULL!	4.4	1	5	2	1	63	1	1	1	1	2	1	4	2	2	2	4	2	1	1	#NULL!	#NULL!	#NULL!	2	60	4	2	1	1	9.3	#NULL!	0	0	0	0	#NULL!	#NULL!		0	1
334	5	2	1	35.6622	12.1754	#NULL!	47.8376	2	4.78376	2	1	56	1	0	1	1	2	1	4	2	1	2	4	2	1	1	1	#NULL!	#NULL!	#NULL!	60	4	2	1	1	9	0	0	0	#NULL!	0	0	1	1	#NULL!	1
335	4	1	1	#NULL!	#NULL!	#NULL!	#NULL!	#NULL!	#NULL!	#NULL!	1	69	2	1	0	1	2	1	3	2	2	2	3	2	1	1	1	5	2	2	64	5	3	1	2	18.79	0	2	0	0	1	#NULL!	#NULL!	1	0	#NULL!
336	4	1	1	117.9	5.13	#NULL!	123.03	2	12.303	2	1	61	1	0	0	1	2	1	4	2	1	2	4	2	1	1	1	5	2	1	60	4	2	1	1	8.54	1	1	0	1	0	1	5	1	#NULL!	1
337	3	2	1	51.9161	0	#NULL!	51	2	2.59161	1	1	62	1	1	1	1	2	1	4	2	0	1	4	2	0	0	#NULL!	#NULL!	#NULL!	#NULL!	65	5	3	1	2	2	1	0	0	#NULL!	0	#NULL!	#NULL!	2	0	0
338	3	1	1	18.1293	6.94	#NULL!	25.0693	1	2.50693	1	1	53	1	0	1	1	2	1	3	2	1	2	2	1	1	1	#NULL!	4	1	2	60	4	2	1	1	81	0	0	#NULL!	#NULL!	1	#NULL!	#NULL!	1	#NULL!	0
339	4	1	1	#NULL!	#NULL!	#NULL!	#NULL!	#NULL!	#NULL!	#NULL!	1	67	2	1	0	0	2	1	3	2	1	2	3	2	1	1	1	1	1	2	64	5	3	1	2	16.16	1	2	0	0	0	1	#NULL!		#NULL!	#NULL!
340	3	1	1	39.8405	7.08947	#NULL!	46.93	2	4.693	2	1	65	1	1	1	1	2	1	4	2	1	2	4	2	1	1	#NULL!	#NULL!	#NULL!	2	50	1	1	0	#NULL!	8	1	0	1	#NULL!	0	1	#NULL!	2	#NULL!	1
341	1	1	1	78.0088	#NULL!	#NULL!	78.0088	2	3	1	1	45	1	0	1	1	2	1	4	2	2	2	4	2	1	1	#NULL!	4	1	2	60	4	2	1	1	42	0	2	0	3	0	3	2	1	#NULL!	0
342	4	2	1	14.3664	7.61806	#NULL!	21.9845	1	2.19845	1	1	62	1	1	1	1	2	1	4	2	1	2	4	2	1	1	#NULL!	#NULL!	#NULL!	1	60	4	2	1	1	2.23	1	2	0	0	0	1	#NULL!		#NULL!	0
343	4	2	1	70	#NULL!	#NULL!	70	2	7	2	2	70	2	1	0	0	2	1	4	2	2	2	4	2	1	1	#NULL!	#NULL!	#NULL!	2	60	4	2	1	1	3.81	1	2	0	0	1	3	1	2	#NULL!	1
344	4	1	1	45.7	#NULL!	#NULL!	45.7	2	4.57	2	1	56	1	0	1	0	2	1	4	2	2	2	4	2	1	1	1	4	1	2	61	4	2	1	1	11.63	0	2	0	3	0	1	#NULL!	1	#NULL!	1
345	2	1	1	97.8801	#NULL!	#NULL!	97.8801	2	6	2	2	59	1	1	0	1	2	1	4	2	2	2	3	2	1	1	2	2	1	#NULL!	58	3	1	0	#NULL!	62	0	0	0	0	0	#NULL!	#NULL!	2	#NULL!	1
346	4	2	1	42.462	#NULL!	#NULL!	42.462	2	4.2462	1	1	57	1	1	0	1	2	1	4	2	2	2	4	2	1	1	1	3	1	#NULL!	50	1	1	0	#NULL!	5	1	1	0	2	1	#NULL!	1	1	0	0
347	4	1	1	#NULL!	#NULL!	#NULL!	#NULL!	#NULL!	#NULL!	#NULL!	1	59	1	1	1	1	2	1	3	2	2	2	3	2	1	1	1	6	2	2	60	4	2	1	1	9.43	1	2	0	2	1	#NULL!	#NULL!		#NULL!	#NULL!
348	4	1	1	#NULL!	#NULL!	#NULL!	#NULL!	#NULL!	#NULL!	#NULL!	1	62	1	0	1	1	2	1	3	2	1	2	3	2	1	1	1	4	1	#NULL!	60	4	2	1	1	101	1	1	0	2	1	2	1		#NULL!	#NULL!
349	3	1	1	111.647	0	#NULL!	111.647	2	11.1647	2	1	61	1	1	1	1	2	1	3	2	0	1	2	1	1	1	#NULL!	#NULL!	#NULL!	2	66	5	3	1	2	17	1	0	0	#NULL!	1	1	#NULL!	1	#NULL!	1
350	2	1	1	37.0886	#NULL!	#NULL!	37.0886	2	4.6	2	1	57	1	1	0	1	2	1	4	2	1	2	3	2	1	1	1	4	1	#NULL!	60	4	2	1	1	15	1	0	0	1	0	#NULL!	#NULL!	2	#NULL!	1
351	4	1	1	56	1.71	#NULL!	57.71	2	5.771	2	1	64	1	1	1	1	2	1	4	2	1	2	4	2	1	1	#NULL!	#NULL!	#NULL!	2	50	1	1	0	#NULL!	16.92	0	2	0	2	0	2	3	2	#NULL!	1
352	3	2	1	#NULL!	#NULL!	#NULL!	#NULL!	#NULL!	#NULL!	#NULL!	1	56	1	1	1	1	2	1	1	1	2	2	3	2	1	1	#NULL!	#NULL!	#NULL!	2	60	4	2	1	1	4	1	0	0	#NULL!	0	#NULL!	#NULL!	2	0	#NULL!
353	2	2	1	31.9208	#NULL!	#NULL!	31.9208	1	3	1	1	46	1	1	1	1	2	1	4	2	3	2	3	2	1	1	1	3	1	2	57	3	1	0	#NULL!	15	1	0	0	1	0	#NULL!	#NULL!	1	0	0
354	5	2	1	59.911	0	#NULL!	59.911	2	5.9911	2	1	66	2	#NULL!	1	1	2	2	4	2	0	1	2	1	1	1	1	#NULL!	#NULL!	#NULL!	64	5	3	1	2	68	0	#NULL!	#NULL!	#NULL!	#NULL!	#NULL!	#NULL!		0	1
355	3	2	1	#NULL!	#NULL!	#NULL!	#NULL!	#NULL!	#NULL!	#NULL!	1	57	1	0	1	1	2	1	2	1	0	1	3	2	1	1	#NULL!	#NULL!	#NULL!	2	50	1	1	0	#NULL!	25	1	#NULL!	#NULL!	2	#NULL!	#NULL!	#NULL!	1	#NULL!	#NULL!
356	5	2	1	36.1443	4.5517	#NULL!	40.696	2	4.0696	1	2	55	1	#NULL!	1	1	2	2	4	2	2	2	4	2	1	1	1	#NULL!	#NULL!	2	64	5	3	1	2	61	0	#NULL!	#NULL!	#NULL!	#NULL!	#NULL!	#NULL!		0	0
357	3	2	1	#NULL!	#NULL!	#NULL!	#NULL!	#NULL!	#NULL!	#NULL!	1	66	2	0	1	1	2	1	2	1	2	2	3	2	1	1	#NULL!	#NULL!	#NULL!	#NULL!	60	4	2	1	1	1.87	0	2	0	#NULL!	1	#NULL!	#NULL!	2	0	#NULL!
358	4	2	1	7.6	#NULL!	#NULL!	7.6	1	4	1	1	55	1	1	1	1	2	1	4	2	3	2	4	2	1	1	1	1	1	1	56	3	1	0	#NULL!	2.43	1	2	0	1	1	1	#NULL!	2	#NULL!	0
359	1	2	1	74.2525	#NULL!	#NULL!	74.2525	2	4	1	1	58	1	0	1	1	2	1	4	2	1	2	4	2	1	1	#NULL!	4	1	2	60	4	2	1	1	21	1	0	1	1	1	4	#NULL!	1	#NULL!	0
360	3	2	1	32.1251	0.698793	#NULL!	32.8239	1	3.28239	1	1	61	1	0	1	1	2	1	4	2	1	2	4	2	1	1	#NULL!	4	1	#NULL!	60	4	2	1	1	51	0	0	0	#NULL!	1	1	#NULL!		#NULL!	0
361	1	2	#NULL!	12.4168	#NULL!	#NULL!	12.4168	1	4	1	2	76	2	0	1	1	2	1	4	2	1	2	4	2	1	1	#NULL!	0	#NULL!	2	60	4	2	1	1	3	1	2	0	2	0	#NULL!	#NULL!	1	#NULL!	0
362	1	2	1	54.3304	#NULL!	#NULL!	54.3304	2	11.9	2	1	53	1	0	1	1	2	2	4	2	1	2	4	2	1	1	#NULL!	3	1	1	62	4	2	1	1	29	0	1	0	2	0	#NULL!	#NULL!	2	#NULL!	1
363	4	2	1	#NULL!	#NULL!	#NULL!	#NULL!	#NULL!	#NULL!	#NULL!	1	66	2	0	1	0	2	1	3	2	1	2	3	2	1	1	1	6	2	2	60	4	2	1	1	12.88	1	2	0	2	1	1	#NULL!	1	#NULL!	#NULL!
364	1	2	1	45.9912	#NULL!	#NULL!	45.9912	2	2	1	1	60	1	0	1	1	2	2	4	2	1	2	4	2	1	1	#NULL!	0	#NULL!	1	62	4	2	1	1	27	1	1	0	2	1	#NULL!	#NULL!	2	#NULL!	0
365	5	2	1	13.2506	4.78897	#NULL!	18.0396	1	2	1	1	70	2	1	1	1	2	1	3	2	2	2	3	2	1	1	1	#NULL!	#NULL!	#NULL!	50	1	1	0	#NULL!	11	1	#NULL!	#NULL!	#NULL!	#NULL!	#NULL!	#NULL!		#NULL!	0
366	1	2	1	21.6101	0	#NULL!	21.6101	1	6	2	1	59	1	0	1	1	2	1	3	2	0	1	2	1	1	1	#NULL!	3	1	1	60	4	2	1	1	48	0	1	0	0	0	#NULL!	#NULL!	2	#NULL!	1
367	3	2	1	#NULL!	#NULL!	#NULL!	45	2	4	#NULL!	1	52	1	0	1	1	2	1	2	1	1	2	2	1	0	0	#NULL!	#NULL!	#NULL!	#NULL!	60	4	2	1	1	9	1	#NULL!	#NULL!	#NULL!	#NULL!	#NULL!	#NULL!	2	0	#NULL!
368	4	2	1	#NULL!	#NULL!	#NULL!	#NULL!	#NULL!	#NULL!	#NULL!	1	65	1	0	1	1	2	1	3	2	2	2	3	2	1	1	1	3	1	2	50	1	1	0	#NULL!	49.15	0	1	0	1	1	#NULL!	#NULL!	1	0	#NULL!
369	4	2	1	12.948	#NULL!	#NULL!	12.948	1	2	1	1	56	1	1	1	1	2	1	4	2	2	2	4	2	1	1	1	5	2	2	60	4	2	1	1	15.67	1	2	0	2	0	1	#NULL!	1	#NULL!	0
370	4	2	1	17.9	#NULL!	#NULL!	17.9	1	2	1	1	78	2	1	1	1	2	1	4	2	2	2	4	2	1	1	1	1	1	1	60	4	2	1	1	16.62	0	1	0	1	0	#NULL!	#NULL!		0	0
371	1	2	1	11.2732	#NULL!	#NULL!	11.2732	1	3	1	2	70	2	0	1	1	2	2	4	2	1	2	4	2	1	1	#NULL!	4	1	2	66	5	3	1	2	40	0	2	0	3	0	#NULL!	#NULL!	2	#NULL!	0
372	4	2	1	36.1	#NULL!	#NULL!	36.1	2	3.61	1	1	58	1	1	1	1	2	1	4	2	3	2	4	2	1	1	1	1	1	2	54	2	1	0	#NULL!	0.56	1	0	0	0	0	2	#NULL!	1	#NULL!	0
373	3	2	1	#NULL!	#NULL!	#NULL!	#NULL!	#NULL!	#NULL!	#NULL!	1	59	1	1	1	1	2	1	2	1	0	1	2	1	1	1	#NULL!	#NULL!	#NULL!	2	60	4	2	1	1	15	1	2	0	#NULL!	0	#NULL!	#NULL!	2	0	#NULL!
374	3	2	1	35.5935	#NULL!	#NULL!	35.5935	2	3.55935	1	1	52	1	0	1	1	2	1	3	2	1	2	4	2	1	1	#NULL!	#NULL!	#NULL!	2	50	1	1	0	#NULL!	34	0	1	0	#NULL!	0	#NULL!	#NULL!	2	#NULL!	0
375	1	2	1	66.757	7.67002	#NULL!	74.427	2	9.5	2	2	61	1	0	1	1	2	1	4	2	2	2	4	2	1	1	#NULL!	2	1	#NULL!	60	4	2	1	1	51	1	2	0	2	1	1	#NULL!	1	#NULL!	1
376	1	2	#NULL!	28.3624	#NULL!	#NULL!	28.3624	1	4	1	1	77	2	0	1	1	2	2	4	2	2	2	4	2	1	1	#NULL!	6	2	2	62	4	2	1	1	25	1	0	1	0	0	1	#NULL!	2	#NULL!	0
377	1	2	1	22.3531	4.57	#NULL!	26.9231	1	4	1	1	64	1	0	1	1	2	2	3	2	1	2	3	2	1	1	#NULL!	3	1	2	63	4	3	1	2	55	0	1	0	1	0	#NULL!	#NULL!	1	#NULL!	0
378	1	2	1	15.8966	#NULL!	#NULL!	15.8966	1	3	1	1	67	2	0	1	1	2	1	4	2	2	2	4	2	1	1	#NULL!	3	1	#NULL!	60	4	2	1	1	12	1	1	0	1	0	2	#NULL!	2	#NULL!	0
379	1	2	1	42.4596	0	#NULL!	42.4596	2	5	2	1	65	1	0	1	1	2	2	4	2	0	1	4	2	1	1	#NULL!	4	1	2	63	4	3	1	2	54	0	1	0	2	1	#NULL!	#NULL!	1	#NULL!	1
380	1	2	1	40.0158	13.77	#NULL!	53.7858	2	6	2	1	72	2	0	1	1	2	1	4	2	1	2	4	2	1	1	#NULL!	2	1	1	63	4	3	1	2	5	1	0	0	2	1	#NULL!	#NULL!	1	#NULL!	1
381	1	2	1	42.4837	#NULL!	#NULL!	42.4837	2	8	2	1	68	2	0	1	1	2	1	4	2	1	2	4	2	1	1	#NULL!	4	1	2	65	5	3	1	2	16	1	2	0	1	1	3	#NULL!	2	#NULL!	1
382	1	2	#NULL!	12.0155	0	#NULL!	12.0155	1	4.3	2	2	76	2	0	1	1	2	1	4	2	0	1	4	2	1	1	#NULL!	1	#NULL!	2	62	4	2	1	1	23	0	0	0	0	1	#NULL!	#NULL!	2	#NULL!	1
383	1	2	1	27.7005	#NULL!	#NULL!	27.7005	1	6	2	1	68	2	0	1	1	2	1	4	2	2	2	4	2	1	1	#NULL!	3	1	#NULL!	63	4	3	1	2	26	0	2	2	2	1	3	1	2	#NULL!	1
384	4	2	1	#NULL!	#NULL!	#NULL!	#NULL!	#NULL!	#NULL!	#NULL!	1	61	1	1	0	0	2	1	3	2	3	2	4	2	0	0	#NULL!	#NULL!	#NULL!	#NULL!	60	4	2	1	1	15	1	1	0	0	0	2	1	1	#NULL!	#NULL!
385	1	2	#NULL!	6.4	0	#NULL!	6.4	1	2	1	2	77	2	0	1	1	2	1	3	2	0	1	2	1	1	1	#NULL!	1	1	2	60	4	2	1	1	74	0	0	0	0	0	#NULL!	#NULL!	1	#NULL!	0
386	1	2	1	29.007	4.38308	#NULL!	33.3901	1	6	2	1	55	1	0	1	1	2	1	3	2	1	2	3	2	1	1	#NULL!	4	1	2	60	4	2	1	1	11	1	1	0	3	0	2	#NULL!	1	#NULL!	1
387	5	2	1	#NULL!	#NULL!	#NULL!	35.9936	2	7	2	1	75	2	1	1	1	2	1	2	1	1	2	2	1	1	1	1	#NULL!	#NULL!	1	60	4	2	1	1	23	1	#NULL!	#NULL!	#NULL!	#NULL!	#NULL!	#NULL!		#NULL!	1
388	1	2	1	16.799	#NULL!	#NULL!	16.799	1	3.8	1	2	64	1	0	1	1	2	1	4	2	1	2	3	2	1	1	#NULL!	6	2	2	62	4	2	1	1	33	0	2	0	3	0	#NULL!	#NULL!	2	#NULL!	0
389	1	2	1	11.2	4.05	#NULL!	15.25	1	4	1	2	66	2	0	1	1	2	1	3	2	1	2	3	2	1	1	#NULL!	1	1	2	60	4	2	1	1	11	1	1	0	0	1	2	#NULL!	1	#NULL!	0
390	1	2	1	51.9848	4.87	#NULL!	56.8548	2	6.5	2	2	75	2	0	1	1	2	1	4	2	1	2	4	2	1	1	#NULL!	1	#NULL!	2	62	4	2	1	1	93	1	1	1	0	1	1	#NULL!	2	#NULL!	1
391	1	2	#NULL!	32.1565	0	#NULL!	32.1565	1	5	2	2	76	2	0	1	1	2	1	3	2	0	1	2	1	1	1	#NULL!	1	1	2	63	4	3	1	2	36	1	0	0	1	1	#NULL!	#NULL!	2	#NULL!	1
392	1	2	1	31.8383	#NULL!	#NULL!	31.8383	1	6.5	2	1	50	1	0	1	1	2	1	4	2	2	2	4	2	1	1	#NULL!	4	1	2	60	4	2	1	1	21	0	1	0	0	1	1	#NULL!	2	#NULL!	1
393	1	2	1	29.8732	11.0732	#NULL!	40.9464	2	4	1	1	58	1	0	1	1	2	1	2	1	2	2	3	2	1	1	#NULL!	6	2	2	60	4	2	1	1	11	1	0	1	3	1	1	#NULL!	1	#NULL!	0
394	4	2	1	20.9956	#NULL!	#NULL!	20.9956	1	2.09956	1	1	56	1	1	1	1	2	1	4	2	2	2	4	2	1	1	#NULL!	#NULL!	#NULL!	2	60	4	2	1	1	25.86	1	2	0	2	0	2	#NULL!	2	#NULL!	0
395	1	2	1	7.3174	0	#NULL!	7.3174	1	2.5	1	2	51	1	0	1	1	2	1	3	2	0	1	2	1	1	1	#NULL!	6	2	#NULL!	57	3	1	0	#NULL!	25	1	1	0	2	0	#NULL!	#NULL!	1	#NULL!	0
396	1	2	1	39.8405	#NULL!	#NULL!	39.8405	2	5	2	1	46	1	0	1	1	2	1	4	2	2	2	4	2	1	1	#NULL!	3	1	2	67	5	3	1	2	18	1	1	1	3	0	#NULL!	#NULL!	2	#NULL!	1
397	1	2	1	55.4434	2.43	#NULL!	57.8734	2	4	1	1	65	1	0	1	1	2	1	3	2	1	2	3	2	1	1	#NULL!	4	1	2	62	4	2	1	1	51	0	0	0	3	1	#NULL!	#NULL!	1	#NULL!	0
398	1	2	1	153.7	16.8	#NULL!	170.5	2	6	2	1	51	1	0	1	1	2	1	3	2	3	2	4	2	1	1	#NULL!	4	1	2	54	2	1	0	#NULL!	31	0	0	0	2	0	#NULL!	1	1	#NULL!	1
399	1	2	1	8.9438	0	#NULL!	8.9438	1	2	1	2	61	1	0	1	1	2	1	3	2	0	1	2	1	1	1	#NULL!	2	1	#NULL!	63	4	3	1	2	35	1	1	0	1	1	1	#NULL!	1	#NULL!	0
400	1	2	1	38.6047	#NULL!	#NULL!	38.6047	2	5	2	2	60	1	0	1	1	2	1	4	2	1	2	4	2	1	1	#NULL!	1	#NULL!	2	62	4	2	1	1	12	1	1	0	0	0	#NULL!	1	2	#NULL!	1
401	1	2	1	46.4805	#NULL!	#NULL!	46.4805	2	5	2	1	57	1	0	1	1	2	1	4	2	1	2	4	2	1	1	#NULL!	4	1	#NULL!	60	4	2	1	1	7	1	2	0	2	0	#NULL!	#NULL!	1	#NULL!	1
402	1	2	1	107.857	#NULL!	#NULL!	107.857	2	8.8	2	1	46	1	0	1	1	2	1	4	2	1	2	4	2	1	1	#NULL!	3	1	#NULL!	54	2	1	0	#NULL!	7	1	2	2	1	1	3	3	2	#NULL!	1
403	1	2	1	26.8	0	#NULL!	26.8	1	5	2	1	75	2	0	1	1	2	1	3	2	0	1	2	1	1	1	#NULL!	1	#NULL!	2	63	4	3	1	2	86	0	0	0	0	0	#NULL!	#NULL!	1	#NULL!	1
404	1	2	1	44.8	0	#NULL!	44.8	2	6	2	1	74	2	0	1	1	2	1	4	2	0	1	4	2	1	1	#NULL!	1	1	#NULL!	60	4	2	1	1	10	1	1	0	1	0	1	#NULL!	1	#NULL!	1
405	1	2	1	79.9799	7.69282	#NULL!	87.6727	2	6	2	1	58	1	0	1	1	2	1	4	2	2	2	4	2	1	1	#NULL!	2	1	2	62	4	2	1	1	12	1	0	0	4	0	3	2	2	#NULL!	1
406	1	2	1	18.349	#NULL!	#NULL!	18.349	1	4.2	1	2	65	1	0	1	1	2	1	4	2	1	2	4	2	1	1	#NULL!	5	2	2	56	3	1	0	#NULL!	35	1	1	0	2	0	#NULL!	#NULL!	2	#NULL!	0
407	1	2	#NULL!	18.9	0	#NULL!	18.9	1	5	2	1	83	2	0	1	1	2	1	2	1	0	1	2	1	1	1	#NULL!	0	#NULL!	2	63	4	3	1	2	70	0	0	0	1	0	#NULL!	#NULL!	1	#NULL!	1
408	1	2	1	12.6045	1.54	#NULL!	14.1445	1	3	1	1	74	2	0	1	1	2	1	4	2	2	2	3	2	0	0	#NULL!	0	#NULL!	#NULL!	62	4	2	1	1	79	1	1	0	0	0	1	#NULL!	1	#NULL!	0
409	1	2	1	4.8	0	#NULL!	4.8	1	3	1	2	72	2	0	1	1	2	1	2	1	0	1	2	1	1	1	#NULL!	0	#NULL!	2	60	4	2	1	1	22	1	1	0	1	0	1	#NULL!	1	#NULL!	0
410	4	2	1	#NULL!	#NULL!	#NULL!	#NULL!	#NULL!	#NULL!	#NULL!	1	24	1	0	0	0	2	1	3	2	2	2	3	2	1	1	#NULL!	#NULL!	#NULL!	2	48	1	1	0	#NULL!	15.18	0	1	0	1	0	2	#NULL!		#NULL!	#NULL!
411	4	2	1	#NULL!	#NULL!	#NULL!	#NULL!	#NULL!	#NULL!	#NULL!	1	58	1	1	1	1	2	1	3	2	1	2	3	2	1	1	1	4	1	2	48	1	1	0	#NULL!	5.42	#NULL!	2	0	1	0	1	#NULL!		#NULL!	#NULL!
412	2	2	1	25.0864	#NULL!	#NULL!	25.0864	1	10	2	1	63	1	0	1	1	2	1	4	2	1	2	3	2	1	1	1	6	2	2	64	5	3	1	2	23	0	1	1	2	1	#NULL!	#NULL!	1	#NULL!	1
413	3	2	1	48.6138	5	#NULL!	53.6138	2	5.36138	2	1	64	1	0	1	1	2	1	3	2	1	2	3	2	1	1	#NULL!	#NULL!	#NULL!	1	60	4	2	1	1	15	0	#NULL!	#NULL!	1	#NULL!	#NULL!	#NULL!	1	0	1
414	3	2	1	50.6741	30.0678	#NULL!	80.7419	2	8.07419	2	1	62	1	0	1	1	2	1	4	2	3	2	4	2	1	1	#NULL!	#NULL!	#NULL!	2	60	4	2	1	1	73	0	0	0	1	1	#NULL!	#NULL!	1	#NULL!	1
415	4	2	1	#NULL!	#NULL!	#NULL!	#NULL!	#NULL!	#NULL!	#NULL!	1	59	1	0	0	1	2	1	3	2	2	2	4	2	1	1	1	2	1	2	60	4	2	1	1	64.43	0	2	0	0	1	1	#NULL!	1	#NULL!	#NULL!
416	2	2	1	35.4145	#NULL!	#NULL!	35.4145	2	5	2	1	72	2	1	0	1	2	1	3	2	2	2	3	2	1	1	1	3	1	2	58	3	1	0	#NULL!	50	0	0	0	1	1	#NULL!	#NULL!	2	0	1
417	2	2	1	8.8223	#NULL!	#NULL!	8.8223	1	6	2	2	71	2	1	0	1	2	1	4	2	2	2	3	2	1	1	2	1	1	2	64	5	3	1	2	13	1	1	0	0	0	#NULL!	#NULL!	1	#NULL!	1
418	3	2	1	37.84	12.51	#NULL!	50.35	2	5.035	2	1	58	1	1	1	1	2	1	4	2	3	2	4	2	1	1	#NULL!	3	1	2	60	4	2	1	1	11	1	0	3	#NULL!	0	1	#NULL!	1	#NULL!	1
419	4	2	1	#NULL!	#NULL!	#NULL!	#NULL!	#NULL!	#NULL!	#NULL!	1	68	2	0	0	0	2	1	3	2	1	1	3	2	1	1	1	4	1	#NULL!	60	4	2	1	1	48.26	0	1	0	0	0	#NULL!	#NULL!		0	#NULL!
420	3	2	1	17.5853	5.13	#NULL!	22.7153	1	2.27153	1	1	70	2	1	1	1	2	1	1	1	2	2	2	1	1	1	#NULL!	#NULL!	#NULL!	1	60	4	2	1	1	50	1	#NULL!	#NULL!	1	#NULL!	#NULL!	#NULL!	1	#NULL!	0
421	5	2	1	#NULL!	#NULL!	#NULL!	#NULL!	#NULL!	#NULL!	#NULL!	1	72	2	1	1	1	2	1	2	1	0	1	2	1	1	1	1	#NULL!	#NULL!	#NULL!	60	4	2	1	1	66	0	#NULL!	#NULL!	#NULL!	#NULL!	#NULL!	#NULL!		0	#NULL!
422	5	2	1	#NULL!	#NULL!	#NULL!	#NULL!	#NULL!	#NULL!	#NULL!	1	72	2	1	1	1	2	1	2	1	0	1	2	1	1	1	1	#NULL!	#NULL!	2	60	4	2	1	1	66	0	#NULL!	#NULL!	#NULL!	#NULL!	#NULL!	#NULL!		0	#NULL!
423	1	2	1	13.2195	0	#NULL!	13.2195	1	3	1	1	51	1	0	1	1	2	1	3	2	0	1	2	1	1	1	#NULL!	4	1	2	62	4	2	1	1	51	0	0	0	1	1	#NULL!	#NULL!	1	#NULL!	0
424	4	2	1	17.9	#NULL!	#NULL!	17.9	1	2	1	1	69	2	1	1	1	2	1	4	2	1	2	4	2	1	1	1	#NULL!	#NULL!	2	66	5	3	1	2	5.72	1	2	0	0	1	3	1		#NULL!	0
425	3	2	#NULL!	#NULL!	#NULL!	#NULL!	#NULL!	#NULL!	#NULL!	#NULL!	1	77	2	0	1	1	2	1	2	1	1	2	3	2	0	0	#NULL!	#NULL!	#NULL!	#NULL!	60	4	2	1	1	19	0	#NULL!	#NULL!	1	#NULL!	#NULL!	#NULL!	1	#NULL!	#NULL!
426	3	2	1	36.6	0.507098	#NULL!	37.1071	2	3.71071	1	1	72	2	1	1	1	2	1	3	2	2	2	4	2	1	1	#NULL!	#NULL!	#NULL!	1	60	4	2	1	1	33	0	2	0	#NULL!	0	#NULL!	#NULL!	1	#NULL!	0
427	4	2	1	#NULL!	#NULL!	#NULL!	#NULL!	#NULL!	#NULL!	#NULL!	1	50	1	0	1	1	2	1	3	2	2	2	3	2	1	1	#NULL!	#NULL!	#NULL!	2	60	4	2	1	1	17.22	1	3	0	1	0	3	1	1	#NULL!	#NULL!
428	3	2	1	18	7.78	#NULL!	25.78	1	2.578	1	1	57	1	0	1	1	2	1	3	2	1	2	3	2	1	1	#NULL!	2	1	#NULL!	60	4	2	1	1	65	1	0	0	2	1	1	#NULL!	1	#NULL!	0
429	2	2	1	11.9197	#NULL!	#NULL!	11.9197	1	8	2	1	64	1	1	1	1	2	1	3	2	2	2	3	2	1	1	1	1	1	1	63	4	3	1	2	5	1	0	0	1	0	#NULL!	#NULL!	1	#NULL!	1
430	1	2	1	45.8649	0	#NULL!	45.8649	2	4	1	1	61	1	0	1	1	2	1	4	2	0	1	4	2	1	1	#NULL!	4	1	2	63	4	3	1	2	33	1	2	1	3	1	#NULL!	#NULL!	1	#NULL!	0
431	5	2	1	#NULL!	#NULL!	#NULL!	10.8939	1	4	#NULL!	1	70	2	1	1	1	2	1	2	1	1	2	2	1	1	1	1	#NULL!	#NULL!	2	60	4	2	1	1	15	0	3	#NULL!	#NULL!	1	#NULL!	#NULL!		0	#NULL!
432	3	2	1	39.5101	5.44715	#NULL!	44.9573	2	4.49573	2	1	68	2	0	1	1	2	1	4	2	2	2	4	2	1	1	#NULL!	#NULL!	#NULL!	2	60	4	2	1	1	58	1	#NULL!	#NULL!	#NULL!	#NULL!	1	#NULL!		#NULL!	1
433	4	2	1	#NULL!	#NULL!	#NULL!	#NULL!	#NULL!	#NULL!	#NULL!	1	75	2	1	1	1	2	1	3	2	2	2	3	2	1	1	#NULL!	#NULL!	#NULL!	2	60	4	2	1	1	21.59	0	0	0	0	0	#NULL!	#NULL!	1	0	#NULL!
434	3	2	1	57.9	155.6	#NULL!	213.5	2	21.35	2	1	63	1	1	1	1	2	1	3	2	3	2	2	1	1	1	#NULL!	4	1	#NULL!	60	4	2	1	1	23	0	3	0	#NULL!	0	1	#NULL!		#NULL!	1
435	3	2	1	#NULL!	#NULL!	#NULL!	#NULL!	#NULL!	#NULL!	#NULL!	1	64	1	1	1	1	2	1	2	1	2	2	4	2	1	1	#NULL!	#NULL!	#NULL!	2	60	4	2	1	1	22	1	#NULL!	#NULL!	#NULL!	#NULL!	#NULL!	#NULL!	2	#NULL!	#NULL!
436	5	2	1	#NULL!	#NULL!	#NULL!	#NULL!	#NULL!	#NULL!	#NULL!	1	71	2	1	1	1	2	1	2	1	2	2	3	2	1	1	1	#NULL!	#NULL!	1	60	4	2	1	1	12	1	#NULL!	#NULL!	#NULL!	#NULL!	#NULL!	#NULL!		0	#NULL!
437	4	2	1	#NULL!	#NULL!	#NULL!	#NULL!	#NULL!	#NULL!	#NULL!	1	62	1	1	1	1	2	1	3	2	1	2	3	2	1	1	1	3	1	2	58	3	1	0	#NULL!	7.52	1	3	0	1	0	#NULL!	#NULL!	1	#NULL!	#NULL!
438	1	2	1	7.5685	64.98	#NULL!	72.5485	2	3	1	2	76	2	0	1	1	2	1	4	2	2	2	4	2	0	0	#NULL!	0	#NULL!	#NULL!	62	4	2	1	1	4	1	0	0	0	0	2	#NULL!	1	#NULL!	0
439	1	2	1	19.1	0	#NULL!	19.1	1	6	2	1	46	1	0	1	1	2	1	3	2	0	1	2	1	1	1	#NULL!	4	1	1	60	4	2	1	1	75	0	1	0	2	0	#NULL!	#NULL!	1	#NULL!	1
440	3	2	1	105.574	0	#NULL!	105.574	2	10.5574	2	1	63	1	1	1	1	2	1	4	2	0	1	4	2	1	1	#NULL!	#NULL!	#NULL!	1	60	4	2	1	1	76	0	2	0	2	0	1	#NULL!		#NULL!	1
441	3	2	1	51.4	2.32945	#NULL!	53.7295	2	5.37295	2	1	45	1	0	1	1	2	1	3	2	2	2	3	2	1	1	#NULL!	1	1	#NULL!	60	4	2	1	1	96	1	2	0	1	1	1	#NULL!	1	#NULL!	1
442	3	2	1	7.31808	4.59	#NULL!	11.9081	1	5	2	1	58	1	1	1	1	2	1	3	2	1	2	3	2	1	1	#NULL!	3	1	1	60	4	2	1	1	17	1	3	0	2	1	1	#NULL!		0	1
443	3	2	1	38.6047	6.47	#NULL!	45.0747	2	4.50747	2	1	65	1	1	1	1	2	1	4	2	1	2	4	2	1	1	#NULL!	#NULL!	#NULL!	1	60	4	2	1	1	13	1	0	0	#NULL!	1	1	#NULL!		0	1
444	2	2	1	24.6155	#NULL!	#NULL!	24.6155	1	4.8	2	2	62	1	1	0	1	2	1	4	2	3	2	3	2	1	1	1	3	1	#NULL!	63	4	3	1	2	27	0	0	0	1	0	#NULL!	#NULL!	1	0	1
445	3	2	1	#NULL!	#NULL!	#NULL!	#NULL!	#NULL!	#NULL!	#NULL!	1	52	1	0	1	1	2	1	1	1	1	2	3	2	1	1	#NULL!	#NULL!	#NULL!	2	60	4	2	1	1	11	1	1	0	#NULL!	0	1	#NULL!		#NULL!	#NULL!
446	4	2	1	14.4	#NULL!	#NULL!	14.4	1	6	2	1	66	2	0	1	1	2	1	4	2	3	2	4	2	1	1	1	1	1	1	50	1	1	0	#NULL!	48.03	1	2	0	0	0	#NULL!	#NULL!		#NULL!	1
447	3	2	1	46.4805	0	#NULL!	46.4805	2	4.64805	2	1	70	2	0	1	1	2	1	4	2	0	1	4	2	1	1	#NULL!	#NULL!	#NULL!	1	60	4	2	1	1	98	1	0	0	1	1	#NULL!	#NULL!	2	#NULL!	1
448	4	2	1	#NULL!	#NULL!	#NULL!	#NULL!	#NULL!	#NULL!	#NULL!	1	58	1	1	1	1	2	1	2	2	1	2	2	1	1	1	1	1	1	1	60	4	2	1	1	12.02	0	0	0	0	1	#NULL!	#NULL!		0	#NULL!
449	4	2	#NULL!	13.2	#NULL!	#NULL!	13.2	1	4	1	2	81	2	1	0	0	2	1	4	2	3	2	4	2	1	1	1	1	1	1	50	1	1	0	#NULL!	65	1	2	0	0	1	#NULL!	#NULL!		#NULL!	0
450	1	2	#NULL!	80.7529	0	#NULL!	80.7529	2	3	1	1	72	2	0	1	1	2	1	3	2	0	1	2	1	1	1	#NULL!	0	#NULL!	1	67	5	3	1	2	26	1	1	0	1	1	3	#NULL!	1	#NULL!	0
451	2	2	#NULL!	37.4699	#NULL!	#NULL!	37.4699	2	7	2	1	72	2	1	1	1	2	1	3	2	2	2	3	2	1	1	2	1	1	2	60	4	2	1	1	11	1	2	0	0	0	#NULL!	#NULL!	2	#NULL!	1
452	4	2	#NULL!	#NULL!	#NULL!	#NULL!	#NULL!	#NULL!	#NULL!	#NULL!	1	82	2	1	1	0	2	1	3	2	0	1	2	1	1	1	#NULL!	#NULL!	#NULL!	2	60	4	2	1	1	50.1	0	2	0	0	0	#NULL!	#NULL!		#NULL!	#NULL!
453	3	2	#NULL!	93.2265	80.97	#NULL!	174.196	2	17.4197	2	1	60	1	1	1	1	2	1	4	2	3	2	3	2	1	1	#NULL!	2	1	#NULL!	56	3	1	0	#NULL!	73	1	0	0	2	0	2	#NULL!	1	#NULL!	1
454	2	2	#NULL!	53.4556	#NULL!	#NULL!	53.4556	2	3	1	1	54	1	1	0	1	2	1	3	2	1	2	3	2	1	1	1	6	2	2	54	2	1	0	#NULL!	35	1	2	0	0	0	#NULL!	#NULL!	1	#NULL!	0
455	4	2	#NULL!	10.7474	6.22	#NULL!	16.9674	1	2	1	2	73	2	0	0	0	2	1	2	1	1	2	2	1	1	1	1	1	1	1	60	4	2	1	1	54.08	0	1	0	2	0	#NULL!	#NULL!	1	0	0
456	3	2	#NULL!	#NULL!	#NULL!	#NULL!	#NULL!	#NULL!	#NULL!	#NULL!	1	62	1	0	1	1	2	1	2	1	0	1	3	2	1	1	#NULL!	#NULL!	#NULL!	2	63	4	3	1	2	20	1	0	0	#NULL!	0	3	3		0	#NULL!
457	4	2	#NULL!	46.1417	1.42	#NULL!	47.5617	2	4.75617	2	1	65	1	1	1	0	2	1	4	2	1	2	4	2	1	1	1	2	1	1	50	1	1	0	#NULL!	9.2	0	2	0	1	0	#NULL!	#NULL!	1	#NULL!	1
458	5	2	#NULL!	25.0778	0	#NULL!	25.0778	1	2.50778	1	2	70	2	1	1	1	2	1	4	2	0	1	4	2	1	1	1	#NULL!	#NULL!	1	62	4	2	1	1	73	0	#NULL!	#NULL!	#NULL!	#NULL!	#NULL!	#NULL!		#NULL!	0
459	3	2	#NULL!	47.8351	#NULL!	#NULL!	47.8351	2	4.78351	2	1	69	2	1	1	1	2	1	4	2	2	2	4	2	1	1	#NULL!	#NULL!	#NULL!	1	66	5	3	1	2	35	1	0	0	2	0	#NULL!	#NULL!	1	#NULL!	1
460	4	2	#NULL!	18.2192	0	#NULL!	18.2192	1	2	1	1	55	1	0	1	1	2	1	4	2	0	1	4	2	1	1	1	#NULL!	#NULL!	1	60	4	2	1	1	5.45	0	1	0	1	1	#NULL!	#NULL!		#NULL!	0
461	5	2	#NULL!	#NULL!	#NULL!	#NULL!	18	#NULL!	3	#NULL!	2	71	2	#NULL!	1	1	2	1	2	1	0	1	2	1	1	1	1	#NULL!	#NULL!	#NULL!	64	5	3	1	2	89	0	#NULL!	#NULL!	#NULL!	#NULL!	#NULL!	#NULL!		0	#NULL!
462	4	2	1	#NULL!	#NULL!	#NULL!	#NULL!	#NULL!	#NULL!	#NULL!	1	79	2	0	0	0	2	1	3	2	0	1	2	1	1	1	#NULL!	#NULL!	#NULL!	2	54	2	1	0	#NULL!	32.49	0	2	0	1	0	#NULL!	#NULL!	1	#NULL!	#NULL!
463	5	2	#NULL!	#NULL!	#NULL!	#NULL!	#NULL!	#NULL!	#NULL!	#NULL!	1	83	2	1	1	1	2	1	2	1	0	1	2	1	1	1	1	#NULL!	#NULL!	1	50	1	1	0	#NULL!	27	0	#NULL!	#NULL!	#NULL!	#NULL!	#NULL!	#NULL!		0	#NULL!
464	4	2	#NULL!	#NULL!	#NULL!	#NULL!	#NULL!	#NULL!	#NULL!	#NULL!	2	56	1	0	0	0	2	1	3	2	2	2	4	2	1	1	1	2	1	2	60	4	2	1	1	1.08	0	1	0	1	0	#NULL!	#NULL!		#NULL!	#NULL!
465	5	2	#NULL!	14.5	#NULL!	#NULL!	14.5	1	2	1	2	68	2	1	1	1	2	1	3	2	2	2	2	1	1	1	1	#NULL!	#NULL!	1	60	4	2	1	1	39	1	#NULL!	#NULL!	#NULL!	#NULL!	#NULL!	#NULL!		0	0
466	3	2	#NULL!	43.9264	2.73	#NULL!	43	2	4.66564	2	1	53	1	0	1	1	2	1	4	2	2	2	4	2	1	1	#NULL!	#NULL!	#NULL!	1	52	2	1	0	#NULL!	2	1	#NULL!	#NULL!	#NULL!	#NULL!	#NULL!	#NULL!	2	0	1
467	3	2	#NULL!	#NULL!	#NULL!	#NULL!	#NULL!	#NULL!	#NULL!	#NULL!	1	57	1	0	1	1	2	1	2	1	0	1	2	1	1	1	#NULL!	#NULL!	#NULL!	1	66	5	3	1	2	6	1	0	0	#NULL!	0	#NULL!	#NULL!	2	0	#NULL!
468	1	2	#NULL!	106.463	19.38	#NULL!	125.843	2	6	2	1	48	1	0	1	1	2	1	4	2	2	2	4	2	1	1	#NULL!	4	1	2	60	4	2	1	1	22	1	1	1	2	1	#NULL!	#NULL!	1	#NULL!	1
469	3	2	#NULL!	#NULL!	#NULL!	#NULL!	#NULL!	#NULL!	#NULL!	#NULL!	1	56	1	0	1	1	2	1	2	1	2	2	2	1	0	0	#NULL!	#NULL!	#NULL!	#NULL!	60	4	2	1	1	14	1	0	0	#NULL!	1	#NULL!	#NULL!		#NULL!	#NULL!
470	4	2	#NULL!	17.517	#NULL!	#NULL!	17.517	1	3	1	1	51	1	1	1	1	2	1	4	2	3	2	4	2	1	1	1	2	1	2	60	4	2	1	1	6.97	0	3	0	4	1	#NULL!	#NULL!		#NULL!	0
471	2	2	#NULL!	77.7632	#NULL!	#NULL!	77.7632	2	6.9	2	2	45	1	0	0	1	2	1	4	2	1	2	3	2	1	1	1	2	1	2	60	4	2	1	1	8	1	2	0	0	0	#NULL!	#NULL!	2	0	1
472	4	2	#NULL!	#NULL!	#NULL!	#NULL!	#NULL!	#NULL!	#NULL!	#NULL!	1	71	2	1	0	1	2	1	3	2	2	2	3	2	1	1	1	1	1	1	49	1	1	0	#NULL!	49.18	0	1	0	0	0	#NULL!	#NULL!	2	0	#NULL!
473	4	2	1	54.4011	2.63	#NULL!	57.0311	2	5.70311	2	1	78	2	0	1	1	2	1	4	2	1	2	4	2	1	1	1	1	1	1	60	4	2	1	1	17.41	1	2	0	2	0	1	#NULL!	1	#NULL!	1
474	1	2	#NULL!	10.8928	5.84	#NULL!	16.7328	1	5	2	1	59	1	0	1	1	2	1	3	2	1	2	3	2	1	1	#NULL!	2	1	2	63	4	3	1	2	20	1	2	0	1	0	#NULL!	#NULL!	1	#NULL!	1
475	4	2	#NULL!	#NULL!	#NULL!	#NULL!	#NULL!	#NULL!	#NULL!	#NULL!	2	73	2	0	0	0	2	1	3	2	3	2	4	2	1	1	#NULL!	#NULL!	#NULL!	2	48	1	1	0	#NULL!	5.62	0	2	0	0	1	#NULL!	#NULL!	1	#NULL!	#NULL!
476	5	2	#NULL!	22.1968	#NULL!	#NULL!	22.1968	1	2.21968	1	1	55	1	#NULL!	1	1	2	1	4	2	3	1	4	2	1	1	1	#NULL!	#NULL!	1	64	5	3	1	2	27	1	#NULL!	#NULL!	#NULL!	#NULL!	#NULL!	#NULL!		#NULL!	0
477	4	2	#NULL!	31.7688	#NULL!	#NULL!	31.7688	1	3.17688	1	1	60	1	0	1	1	2	1	4	2	2	2	4	2	1	1	1	3	1	2	59	4	2	1	1	14.85	1	1	0	2	1	4	#NULL!	2	#NULL!	0
478	5	2	#NULL!	#NULL!	#NULL!	#NULL!	#NULL!	#NULL!	#NULL!	#NULL!	1	62	1	#NULL!	1	1	2	1	2	1	0	1	2	1	1	1	1	#NULL!	#NULL!	2	66	5	3	1	2	73	0	#NULL!	#NULL!	#NULL!	#NULL!	#NULL!	#NULL!		0	#NULL!
479	5	2	#NULL!	25.7228	#NULL!	#NULL!	25.7228	1	2.57228	1	2	50	1	#NULL!	1	1	2	1	4	2	1	2	4	2	1	1	1	#NULL!	#NULL!	2	66	5	3	1	2	65	0	#NULL!	#NULL!	#NULL!	#NULL!	#NULL!	#NULL!		#NULL!	0
480	4	2	#NULL!	#NULL!	#NULL!	#NULL!	#NULL!	#NULL!	#NULL!	#NULL!	1	54	1	0	0	0	2	1	1	1	1	2	1	1	1	1	#NULL!	#NULL!	#NULL!	2	60	4	2	1	1	24.41	0	2	0	2	0	1	#NULL!	2	#NULL!	#NULL!
481	2	2	#NULL!	48.7972	7.29	#NULL!	56.0872	2	4	1	1	68	2	1	1	1	2	1	3	2	1	1	3	2	1	1	1	4	1	2	66	5	3	1	2	46	0	0	0	2	0	#NULL!	#NULL!	1	0	0
482	4	2	#NULL!	22.3	#NULL!	#NULL!	22.3	1	2.23	1	1	61	1	0	1	1	2	1	4	2	3	2	4	2	1	1	1	7	2	2	60	4	2	1	1	19.81	0	0	0	2	0	2	#NULL!		#NULL!	0
483	1	2	#NULL!	4.2393	5.48	#NULL!	9.7193	1	2	1	1	44	1	0	1	1	2	1	2	1	2	2	3	2	1	1	#NULL!	4	1	#NULL!	62	4	2	1	1	6.01	0	0	0	0	1	#NULL!	#NULL!	1	0	0
484	3	2	#NULL!	79.9799	102.54	#NULL!	182.52	2	18.252	2	1	49	1	1	1	1	2	1	4	2	3	2	4	2	1	1	#NULL!	1	1	2	55	3	1	0	#NULL!	69	1	0	0	#NULL!	1	2	#NULL!		#NULL!	1
485	4	2	#NULL!	34.98	6.71	#NULL!	41.69	2	4.169	1	1	40	1	1	0	1	2	1	2	1	1	2	2	1	1	1	1	2	1	2	60	4	2	1	1	73.59	0	3	0	1	1	#NULL!	#NULL!	1	0	0
486	4	2	#NULL!	#NULL!	#NULL!	#NULL!	#NULL!	#NULL!	#NULL!	#NULL!	1	54	1	1	1	1	2	1	3	2	2	2	4	2	1	1	#NULL!	#NULL!	#NULL!	2	50	1	1	0	#NULL!	35.15	0	0	0	0	0	2	1	1	#NULL!	#NULL!
487	3	2	#NULL!	12.8654	0	#NULL!	12.8654	1	2	1	1	64	1	0	1	1	2	1	3	2	0	1	4	2	1	1	#NULL!	#NULL!	#NULL!	2	60	4	2	1	1	6	1	#NULL!	#NULL!	3	#NULL!	#NULL!	#NULL!	2	#NULL!	0
488	3	2	#NULL!	25.9	9.85	#NULL!	35.75	2	3.575	1	1	59	1	0	1	1	2	1	3	2	2	2	3	2	1	1	#NULL!	#NULL!	#NULL!	2	60	4	2	1	1	12	1	0	0	2	1	3	1		0	0
489	3	2	#NULL!	18.349	1.77	#NULL!	20.119	1	2.0119	1	1	56	1	0	1	1	2	1	4	2	2	2	4	2	1	1	#NULL!	#NULL!	#NULL!	2	65	5	3	1	2	19	1	0	0	#NULL!	0	1	#NULL!	1	#NULL!	0
490	4	2	1	#NULL!	#NULL!	#NULL!	#NULL!	#NULL!	#NULL!	#NULL!	2	75	2	1	0	0	2	1	3	2	1	2	3	2	1	1	#NULL!	#NULL!	#NULL!	2	60	4	2	1	1	8	1	2	0	1	0	#NULL!	#NULL!	1	0	#NULL!
491	3	2	1	#NULL!	#NULL!	#NULL!	#NULL!	#NULL!	#NULL!	#NULL!	1	60	1	0	1	1	2	1	2	1	1	2	3	2	1	1	#NULL!	#NULL!	#NULL!	#NULL!	60	4	2	1	1	47	1	0	0	#NULL!	0	#NULL!	#NULL!	1	#NULL!	#NULL!
492	5	2	1	86.8278	4.63	#NULL!	91.4578	2	9.14578	2	1	74	2	1	1	1	2	1	4	2	2	2	4	2	1	1	1	#NULL!	#NULL!	#NULL!	60	4	2	1	1	6	1	#NULL!	#NULL!	#NULL!	#NULL!	#NULL!	#NULL!		#NULL!	1
493	4	2	1	12.5184	18.3818	#NULL!	30.9002	1	3.09002	1	2	67	2	0	0	0	2	1	4	2	1	2	4	2	1	1	1	2	1	2	49	1	1	0	#NULL!	32.07	0	1	0	3	0	3	#NULL!	1	#NULL!	0
494	3	2	1	12.6045	#NULL!	#NULL!	12.6045	1	5	2	1	58	1	0	1	1	2	1	4	2	1	2	4	2	1	1	#NULL!	4	1	1	60	4	2	1	1	22	1	3	0	#NULL!	0	#NULL!	#NULL!	1	#NULL!	1
495	4	2	1	156.2	8.86	#NULL!	165.06	2	16.506	2	1	61	1	0	1	1	2	1	4	2	1	2	4	2	1	1	1	4	1	2	60	4	2	1	1	13.67	1	1	0	0	0	#NULL!	3		#NULL!	1
496	3	2	1	57.2144	12.6005	#NULL!	69.8149	2	6.98149	2	1	57	1	0	1	1	2	1	4	2	1	2	4	2	1	1	#NULL!	#NULL!	#NULL!	2	60	4	2	1	1	24	1	2	0	#NULL!	0	#NULL!	#NULL!	1	0	1
497	3	2	1	62.6087	3.64	#NULL!	66.2487	2	6.62487	2	1	61	1	1	1	1	2	1	4	2	2	2	4	2	1	1	#NULL!	2	1	2	66	5	3	1	2	93	1	0	0	#NULL!	1	#NULL!	#NULL!	1	#NULL!	1
498	3	2	1	22	4.38308	#NULL!	26.3831	1	2.63831	1	1	53	1	0	1	1	2	1	3	2	1	2	4	2	1	1	#NULL!	4	1	#NULL!	60	4	2	1	1	79	0	0	#NULL!	#NULL!	0	#NULL!	#NULL!	2	#NULL!	0
499	4	2	1	19.0936	12.99	#NULL!	32.0836	1	3.20836	1	2	60	1	1	0	0	2	1	4	2	1	2	4	2	0	0	#NULL!	#NULL!	#NULL!	#NULL!	70	5	3	1	2	6.44	1	0	0	0	0	1	#NULL!		#NULL!	0
500	2	2	1	80.9897	11.4553	#NULL!	92.445	2	5	2	2	69	2	1	0	1	2	1	3	2	2	2	3	2	1	1	1	3	1	2	66	5	3	1	2	35	0	0	0	0	0	#NULL!	#NULL!	1	0	1
501	4	2	1	#NULL!	#NULL!	#NULL!	#NULL!	#NULL!	#NULL!	#NULL!	1	72	2	0	0	1	2	1	3	2	2	2	4	2	1	1	1	1	1	1	49	1	1	0	#NULL!	53	1	2	2	3	1	#NULL!	#NULL!		#NULL!	#NULL!
502	3	2	1	20.3	4.5621	#NULL!	24.8621	1	2.48621	1	1	53	1	0	1	1	2	1	3	2	2	2	3	2	1	1	#NULL!	#NULL!	#NULL!	2	60	4	2	1	1	6.67	0	2	#NULL!	#NULL!	0	#NULL!	#NULL!	1	#NULL!	0
503	2	2	#NULL!	49.7962	#NULL!	#NULL!	49.7962	2	8	2	1	70	2	1	0	1	2	1	4	2	1	2	3	2	1	1	1	2	1	2	50	1	1	0	#NULL!	12	0	0	0	2	0	#NULL!	#NULL!	1	0	1
504	5	2	#NULL!	33.4657	0	#NULL!	33.4657	1	3.34657	1	2	74	2	1	1	1	2	1	4	2	0	1	4	2	1	1	1	#NULL!	#NULL!	#NULL!	60	4	2	1	1	15	0	#NULL!	#NULL!	#NULL!	#NULL!	#NULL!	#NULL!		0	0
505	3	2	#NULL!	40.8523	5.79	#NULL!	46.6423	2	4.66423	2	1	53	1	1	1	1	2	1	4	2	1	2	4	2	1	1	#NULL!	#NULL!	#NULL!	2	63	4	3	1	2	10	1	0	0	3	1	#NULL!	#NULL!	2	0	1
506	3	2	#NULL!	33.3666	9.26208	#NULL!	42.6287	2	4.26287	1	1	62	1	1	1	1	2	1	4	2	3	1	4	2	0	0	#NULL!	#NULL!	#NULL!	#NULL!	66	5	3	1	2	106	1	0	0	#NULL!	1	#NULL!	#NULL!	1	#NULL!	0
507	4	2	#NULL!	#NULL!	#NULL!	#NULL!	#NULL!	#NULL!	#NULL!	#NULL!	1	54	1	0	1	1	2	1	3	2	2	2	3	2	1	1	1	6	2	2	60	4	2	1	1	16.03	1	2	0	1	1	3	1	1	#NULL!	#NULL!
508	2	2	#NULL!	#NULL!	#NULL!	#NULL!	#NULL!	#NULL!	5	2	2	72	2	0	0	1	2	1	2	1	2	2	3	2	1	1	1	4	1	#NULL!	54	2	1	0	#NULL!	94	0	0	0	0	1	#NULL!	#NULL!	1	#NULL!	1
509	4	2	#NULL!	#NULL!	#NULL!	#NULL!	#NULL!	#NULL!	#NULL!	#NULL!	2	67	2	1	0	0	2	1	3	2	1	2	4	2	0	0	#NULL!	#NULL!	#NULL!	#NULL!	60	4	2	1	1	50.92	0	3	0	2	1	#NULL!	#NULL!	2	#NULL!	#NULL!
510	4	2	#NULL!	#NULL!	#NULL!	#NULL!	#NULL!	#NULL!	#NULL!	#NULL!	2	54	1	0	0	0	2	1	3	2	2	2	3	2	1	1	#NULL!	#NULL!	#NULL!	2	56	3	1	0	#NULL!	1.51	0	2	0	1	1	3	#NULL!	2	#NULL!	#NULL!
511	3	2	#NULL!	154.841	0	#NULL!	154.841	2	15.4841	2	1	81	2	1	1	1	2	1	4	2	0	1	4	2	1	1	#NULL!	#NULL!	#NULL!	2	60	4	2	1	1	4	1	0	0	1	1	3	1		0	1
512	4	2	#NULL!	#NULL!	#NULL!	#NULL!	#NULL!	#NULL!	#NULL!	#NULL!	1	71	2	1	1	0	2	1	3	2	3	2	4	2	1	1	1	4	1	2	50	1	1	0	#NULL!	2.89	0	2	0	3	1	#NULL!	#NULL!		0	#NULL!
513	4	2	#NULL!	68.5669	#NULL!	#NULL!	68.5669	2	6.85669	2	1	55	1	0	1	1	2	1	4	2	3	2	4	2	1	1	#NULL!	#NULL!	#NULL!	2	51	2	1	0	#NULL!	4.37	1	2	0	0	1	1	#NULL!		#NULL!	1
514	4	2	#NULL!	#NULL!	#NULL!	#NULL!	#NULL!	#NULL!	#NULL!	#NULL!	1	61	1	1	0	1	2	1	1	1	1	2	2	1	1	1	1	#NULL!	#NULL!	2	60	4	2	1	1	67.48	0	2	0	2	1	#NULL!	#NULL!	2	0	#NULL!
515	3	2	#NULL!	69.3448	0	#NULL!	69.3448	2	6.93448	2	1	58	1	1	1	1	2	1	3	2	0	1	3	2	1	1	#NULL!	4	1	1	58	3	1	0	#NULL!	11	1	1	0	#NULL!	1	3	#NULL!	2	0	1
516	3	2	#NULL!	48.9746	4.57965	#NULL!	53.5542	2	5.35542	2	1	55	1	1	1	1	2	1	4	2	1	1	4	2	0	0	#NULL!	#NULL!	#NULL!	#NULL!	60	4	2	1	1	102	1	0	0	#NULL!	1	#NULL!	#NULL!	1	#NULL!	1
517	1	2	1	55.8632	#NULL!	#NULL!	55.8632	2	9.8	2	1	80	2	0	1	1	2	1	4	2	1	2	4	2	1	1	#NULL!	1	#NULL!	2	62	4	2	1	1	25	1	1	0	0	1	#NULL!	#NULL!	1	#NULL!	1
518	1	2	#NULL!	15.9	3.56634	#NULL!	19.4663	1	5	2	1	53	1	1	1	1	2	1	4	1	1	2	4	2	1	1	#NULL!	5	2	2	63	4	3	1	2	110	1	1	0	3	1	#NULL!	#NULL!	1	#NULL!	1
519	5	2	#NULL!	24.4849	0	#NULL!	24.4849	1	2.44849	1	1	63	1	1	1	1	2	1	4	2	0	1	4	2	1	1	1	#NULL!	#NULL!	2	62	4	2	1	1	62	1	#NULL!	#NULL!	#NULL!	#NULL!	#NULL!	#NULL!		0	0
520	1	2	1	39.721	#NULL!	#NULL!	39.721	2	7.8	2	1	54	1	0	1	1	2	1	4	2	1	2	4	2	1	1	#NULL!	4	1	2	64	5	3	1	2	29	1	2	0	1	1	#NULL!	#NULL!	2	0	1
521	3	2	1	45.8649	13.54	#NULL!	59.4049	2	5.94049	2	1	54	1	1	1	1	2	1	4	1	2	2	4	2	1	1	#NULL!	#NULL!	#NULL!	2	60	4	2	1	1	124	1	#NULL!	#NULL!	#NULL!	#NULL!	#NULL!	#NULL!	1	#NULL!	1
522	1	2	1	111.1	2.52	#NULL!	113.62	2	6	2	1	48	1	0	1	1	2	1	3	2	1	2	3	2	1	1	#NULL!	2	1	2	62	4	2	1	1	19	1	0	0	0	1	2	#NULL!	1	#NULL!	1
523	3	2	1	71.9958	2.5	#NULL!	74.4958	2	7.44958	2	1	56	1	0	1	1	2	1	3	2	1	2	3	2	1	1	#NULL!	#NULL!	#NULL!	1	60	4	2	1	1	19	1	1	0	#NULL!	1	2	#NULL!	2	0	1
524	5	2	1	13.0367	#NULL!	#NULL!	13.0367	1	6	2	1	70	2	1	1	1	2	1	3	2	3	2	3	2	1	1	1	#NULL!	#NULL!	2	60	4	2	1	1	16	1	#NULL!	#NULL!	#NULL!	#NULL!	#NULL!	#NULL!		#NULL!	1
525	4	2	1	#NULL!	#NULL!	#NULL!	#NULL!	#NULL!	#NULL!	#NULL!	1	49	1	1	0	1	2	1	3	2	2	2	3	2	1	1	1	3	1	#NULL!	65	5	3	1	2	2.14	1	2	0	1	1	#NULL!	#NULL!	2	#NULL!	#NULL!
526	2	2	1	46.1921	9.99	#NULL!	56.1821	2	2	1	1	58	1	0	0	1	2	1	4	2	2	2	3	2	1	1	1	4	1	#NULL!	63	4	3	1	2	10	1	0	0	0	1	#NULL!	#NULL!	1	#NULL!	0
527	1	2	1	35.281	#NULL!	#NULL!	35.281	2	4	1	2	54	1	0	1	1	2	1	4	2	1	2	4	2	1	1	#NULL!	4	1	#NULL!	62	4	2	1	1	45	0	0	0	1	1	#NULL!	#NULL!	1	0	0
528	3	2	1	#NULL!	#NULL!	#NULL!	#NULL!	#NULL!	#NULL!	#NULL!	1	55	1	0	1	1	2	1	2	1	1	2	1	1	1	1	#NULL!	#NULL!	#NULL!	1	60	4	2	1	1	47	1	#NULL!	#NULL!	2	#NULL!	1	#NULL!	1	#NULL!	#NULL!
529	3	2	1	#NULL!	#NULL!	#NULL!	#NULL!	#NULL!	#NULL!	#NULL!	1	62	1	1	1	1	2	1	2	1	1	2	2	1	1	1	#NULL!	#NULL!	#NULL!	1	59	4	2	1	1	67	0	0	0	#NULL!	1	#NULL!	#NULL!	1	#NULL!	#NULL!
530	5	2	1	15.5748	#NULL!	#NULL!	15.5748	1	4	1	1	70	2	1	1	1	2	1	3	2	2	2	3	2	1	1	1	#NULL!	#NULL!	2	60	4	2	1	1	61	0	#NULL!	#NULL!	#NULL!	#NULL!	#NULL!	#NULL!		0	0
531	3	2	1	87.1	#NULL!	#NULL!	87.1	2	8.71	2	1	49	1	1	1	1	2	1	3	2	3	2	3	2	1	1	#NULL!	4	1	2	60	4	2	1	1	3	1	2	#NULL!	#NULL!	1	#NULL!	#NULL!	1	0	1
532	4	2	1	#NULL!	#NULL!	#NULL!	#NULL!	#NULL!	#NULL!	#NULL!	1	63	1	1	1	1	2	1	3	2	3	2	4	2	0	0	#NULL!	#NULL!	#NULL!	#NULL!	62	4	2	1	1	17.41	0	2	0	0	1	#NULL!	#NULL!		0	#NULL!
533	4	2	1	#NULL!	#NULL!	#NULL!	#NULL!	#NULL!	#NULL!	#NULL!	1	72	2	1	1	1	2	1	3	2	1	2	3	2	1	1	#NULL!	#NULL!	#NULL!	2	60	4	2	1	1	43.2	0	1	0	0	1	#NULL!	#NULL!		#NULL!	#NULL!
534	4	2	1	46.8872	#NULL!	#NULL!	46.8872	2	4.68872	2	1	61	1	0	1	1	2	1	4	2	2	2	4	2	0	0	#NULL!	#NULL!	#NULL!	#NULL!	60	4	2	1	1	7.69	1	3	0	0	1	1	#NULL!	2	#NULL!	1
535	3	2	1	7.5685	0	#NULL!	7.5685	1	2	1	1	74	2	1	1	1	2	1	4	2	0	1	4	2	0	0	#NULL!	#NULL!	#NULL!	#NULL!	60	4	2	1	1	27	1	0	0	1	1	1	#NULL!	2	#NULL!	0
536	4	2	1	91.5275	1.7	#NULL!	93.2275	2	9.32275	2	1	56	1	1	1	1	2	1	4	2	1	2	4	2	1	1	1	2	1	2	54	2	1	0	#NULL!	2.56	1	1	0	2	1	1	#NULL!		#NULL!	1
537	5	2	#NULL!	#NULL!	#NULL!	#NULL!	15.0537	1	3	#NULL!	1	85	2	1	1	1	2	1	2	1	1	2	2	1	1	1	1	#NULL!	#NULL!	1	60	4	2	1	1	15	0	#NULL!	#NULL!	#NULL!	#NULL!	#NULL!	#NULL!		0	#NULL!
538	1	2	1	16.1142	#NULL!	#NULL!	16.1142	1	4	1	2	59	1	0	1	1	2	1	4	2	2	2	4	2	1	1	#NULL!	3	1	2	62	4	2	1	1	18	1	0	0	2	1	3	4	1	#NULL!	0
539	1	2	1	45.7808	15.14	#NULL!	60.9208	2	6	2	1	63	1	0	1	1	2	1	3	2	1	2	4	2	1	1	#NULL!	4	1	1	60	4	2	1	1	40	1	0	0	4	1	1	#NULL!	1	#NULL!	1
540	4	2	1	#NULL!	#NULL!	#NULL!	#NULL!	#NULL!	#NULL!	#NULL!	1	63	1	0	1	1	2	1	3	2	1	2	3	2	1	1	1	5	2	2	50	1	1	0	#NULL!	79.67	0	0	0	2	1	#NULL!	#NULL!	1	#NULL!	#NULL!
541	1	2	2	#NULL!	#NULL!	#NULL!	#NULL!	#NULL!	6	2	2	75	2	0	1	1	2	1	4	2	2	2	4	2	1	1	#NULL!	0	#NULL!	2	62	4	2	1	1	44	0	#NULL!	#NULL!	#NULL!	#NULL!	3	3	1	#NULL!	1
542	4	2	2	#NULL!	#NULL!	#NULL!	#NULL!	#NULL!	#NULL!	#NULL!	1	64	1	0	1	0	2	1	3	2	2	2	4	2	1	1	#NULL!	#NULL!	#NULL!	1	60	4	2	1	1	7.66	1	1	0	2	1	1	1		#NULL!	#NULL!
543	1	2	2	54.171	#NULL!	#NULL!	54.171	2	6.8	2	2	73	2	0	1	1	2	1	4	2	1	2	4	2	1	1	#NULL!	1	1	2	60	4	2	1	1	26	0	1	0	2	1	#NULL!	#NULL!	2	0	1
544	4	2	1	118.339	#NULL!	#NULL!	118.339	2	11.8339	2	2	78	2	1	0	1	2	1	4	2	2	2	4	2	1	1	1	#NULL!	#NULL!	1	60	4	2	1	1	10.32	1	2	0	0	1	2	#NULL!	1	#NULL!	1
545	3	2	2	16.4	#NULL!	#NULL!	16.4	1	2	1	1	55	1	0	1	1	2	1	3	2	1	2	3	2	1	1	#NULL!	#NULL!	#NULL!	1	60	4	2	1	1	14	0	0	0	#NULL!	0	#NULL!	#NULL!	1	0	0
546	3	2	2	90.7358	74.66	#NULL!	165.396	2	16.5396	2	1	59	1	1	1	1	2	1	4	2	3	2	4	2	1	1	#NULL!	2	1	1	60	4	2	1	1	10	1	0	0	1	0	#NULL!	#NULL!	2	#NULL!	1
547	3	2	#NULL!	#NULL!	#NULL!	#NULL!	13	1	3	#NULL!	1	87	2	1	1	1	2	1	2	1	1	2	1	1	1	1	#NULL!	#NULL!	#NULL!	2	60	4	2	1	1	116	1	0	0	#NULL!	0	#NULL!	#NULL!	1	#NULL!	#NULL!
548	4	2	2	#NULL!	#NULL!	#NULL!	#NULL!	#NULL!	#NULL!	#NULL!	1	70	2	1	1	1	2	1	3	2	2	2	3	2	1	1	1	5	2	2	60	4	2	1	1	12.68	1	2	0	0	0	1	#NULL!	1	#NULL!	#NULL!
549	4	2	2	42.2	#NULL!	#NULL!	42.2	2	4.22	1	2	51	1	1	0	0	2	1	4	2	2	2	4	2	1	1	1	5	2	2	60	4	2	1	1	5.45	1	1	0	0	0	1	#NULL!	1	#NULL!	0
550	5	2	2	#NULL!	#NULL!	#NULL!	#NULL!	#NULL!	#NULL!	#NULL!	2	59	1	0	1	1	2	1	2	1	1	2	2	1	1	1	1	#NULL!	#NULL!	1	60	4	2	1	1	18	0	#NULL!	#NULL!	#NULL!	#NULL!	#NULL!	#NULL!		#NULL!	#NULL!
551	5	2	2	#NULL!	#NULL!	#NULL!	#NULL!	#NULL!	#NULL!	#NULL!	2	65	1	0	1	1	2	1	2	1	1	2	2	1	1	1	1	#NULL!	#NULL!	#NULL!	60	4	2	1	1	34	0	#NULL!	#NULL!	#NULL!	#NULL!	#NULL!	#NULL!		0	#NULL!
552	4	2	2	81.2577	#NULL!	#NULL!	81.2577	2	8.12577	2	1	70	2	1	1	1	2	1	4	2	2	2	4	2	1	1	1	1	1	1	50	1	1	0	#NULL!	19	1	1	0	0	0	#NULL!	#NULL!		#NULL!	1
553	5	2	2	#NULL!	#NULL!	#NULL!	26	1	3	#NULL!	1	56	1	#NULL!	1	1	2	1	2	1	0	1	2	1	1	1	1	#NULL!	#NULL!	1	66	5	3	1	2	112	0	#NULL!	#NULL!	#NULL!	#NULL!	#NULL!	#NULL!		0	#NULL!
554	3	2	2	93.585	5.91	#NULL!	99.495	2	9.9495	2	1	66	2	0	1	1	2	1	3	2	1	2	3	2	1	1	#NULL!	#NULL!	#NULL!	2	60	4	2	1	1	13	1	0	0	#NULL!	0	2	#NULL!	2	0	1
555	2	2	2	49.5492	0	#NULL!	49.5492	2	3	1	1	70	2	0	0	1	2	1	3	2	0	1	1	1	1	1	1	2	1	#NULL!	50	1	1	0	#NULL!	5	0	0	0	2	0	#NULL!	#NULL!	1	0	0
556	2	2	2	14.3161	#NULL!	#NULL!	14.3161	1	3	1	1	66	2	1	1	1	2	1	3	2	1	2	3	2	1	1	1	4	1	2	60	4	2	1	1	50	0	2	0	3	0	#NULL!	#NULL!	1	0	0
557	5	2	2	#NULL!	#NULL!	#NULL!	#NULL!	#NULL!	#NULL!	#NULL!	1	56	1	0	1	1	2	1	2	1	0	1	2	1	1	1	1	#NULL!	#NULL!	2	60	4	2	1	1	16	1	#NULL!	#NULL!	#NULL!	#NULL!	#NULL!	#NULL!		#NULL!	#NULL!
558	4	2	2	18	0	#NULL!	18	1	2	1	1	61	1	1	1	1	2	1	4	2	0	1	4	2	1	1	#NULL!	#NULL!	#NULL!	2	48	1	1	0	#NULL!	4.24	1	1	0	1	0	1	#NULL!	2	#NULL!	0
559	5	2	2	#NULL!	#NULL!	#NULL!	#NULL!	#NULL!	#NULL!	#NULL!	2	72	2	0	1	1	2	1	2	1	0	1	2	1	1	1	1	#NULL!	#NULL!	1	60	4	2	1	1	31	0	#NULL!	#NULL!	#NULL!	#NULL!	#NULL!	#NULL!		0	#NULL!
560	4	2	2	#NULL!	#NULL!	#NULL!	11	1	2	#NULL!	1	40	1	1	1	1	2	1	1	1	2	2	3	2	1	1	1	5	2	2	50	1	1	0	#NULL!	5.06	0	1	0	1	0	#NULL!	#NULL!		#NULL!	#NULL!
561	4	2	2	#NULL!	#NULL!	#NULL!	#NULL!	#NULL!	#NULL!	#NULL!	1	67	2	1	1	1	2	1	3	2	2	2	4	2	0	0	#NULL!	#NULL!	#NULL!	#NULL!	56	3	1	0	#NULL!	5.68	1	1	0	2	0	2	#NULL!		#NULL!	#NULL!
562	4	2	2	90.6395	1.51	#NULL!	92.1495	2	9.21495	2	1	64	1	1	1	1	2	1	4	2	1	2	4	2	1	1	1	6	2	2	60	4	2	1	1	52.73	0	2	0	1	0	#NULL!	#NULL!	2	#NULL!	1
563	5	2	1	38.4142	0	#NULL!	38.4142	2	3.84142	1	2	77	2	0	1	1	2	1	3	2	0	1	3	2	1	1	1	#NULL!	#NULL!	1	60	4	2	1	1	11	1	#NULL!	#NULL!	#NULL!	#NULL!	#NULL!	#NULL!		0	0
564	3	2	2	106.463	4.87	#NULL!	111.332	2	11.1333	2	1	61	1	0	1	1	2	1	4	2	1	2	4	2	1	1	#NULL!	2	1	2	60	4	2	1	1	16	1	0	0	#NULL!	0	1	#NULL!	1	0	1
565	4	2	2	14.8495	4.24	#NULL!	19.0895	1	2	1	1	46	1	1	0	0	2	1	4	2	1	2	4	2	1	1	1	#NULL!	#NULL!	2	66	5	3	1	2	86.05	0	0	0	0	0	#NULL!	#NULL!		0	0
566	4	2	2	#NULL!	#NULL!	#NULL!	#NULL!	#NULL!	#NULL!	#NULL!	1	49	1	0	0	1	2	1	3	2	1	2	3	2	1	1	1	#NULL!	#NULL!	2	49	1	1	0	#NULL!	58.32	1	1	0	0	0	3	1	2	#NULL!	#NULL!
567	3	2	2	#NULL!	#NULL!	#NULL!	#NULL!	#NULL!	#NULL!	#NULL!	1	71	2	0	1	1	2	1	2	1	0	1	3	2	0	0	#NULL!	#NULL!	#NULL!	#NULL!	60	4	2	1	1	20	1	2	0	#NULL!	0	3	1	1	#NULL!	#NULL!
568	3	2	#NULL!	55	0	#NULL!	55	2	5.5	2	1	81	2	1	1	1	2	1	3	2	0	1	3	2	0	0	#NULL!	#NULL!	#NULL!	#NULL!	60	4	2	1	1	25	1	#NULL!	#NULL!	#NULL!	#NULL!	#NULL!	#NULL!	2	#NULL!	1
569	4	2	2	24.1841	#NULL!	#NULL!	24.1841	1	2.41841	1	1	67	2	0	1	1	2	1	4	2	3	2	4	2	1	1	1	4	1	2	50	1	1	0	#NULL!	51	0	2	0	2	0	#NULL!	#NULL!		#NULL!	0
570	4	2	2	17.7	2.00153	#NULL!	19.7015	1	5	2	2	59	1	0	0	0	2	1	2	1	1	2	2	1	1	1	1	2	1	2	50	1	1	0	#NULL!	31.15	0	0	0	3	0	#NULL!	#NULL!	1	0	1
571	3	2	2	13.7368	1.63	#NULL!	15.3668	1	6	2	1	76	2	1	1	1	2	1	3	2	1	2	3	2	0	0	#NULL!	#NULL!	#NULL!	#NULL!	59	4	2	1	1	25	1	1	0	1	0	#NULL!	#NULL!	2	#NULL!	1
572	4	2	2	57.5152	#NULL!	#NULL!	57.5152	2	5.75152	2	1	52	1	0	1	1	2	1	4	2	3	2	4	2	1	1	1	4	1	2	60	4	2	1	1	18.43	1	0	0	0	0	#NULL!	#NULL!		#NULL!	1
573	3	2	2	40.0726	3.0684	#NULL!	43.141	2	4.3141	2	1	61	1	0	1	1	2	1	4	2	2	2	4	2	1	1	#NULL!	1	1	#NULL!	58	3	1	0	#NULL!	92	0	0	0	4	0	#NULL!	#NULL!	1	#NULL!	1
574	3	2	2	51.2	#NULL!	#NULL!	51.2	2	5.12	2	1	59	1	0	1	1	2	1	3	2	2	2	3	2	1	1	#NULL!	4	1	#NULL!	60	4	2	1	1	35	1	0	#NULL!	2	0	#NULL!	#NULL!	2	#NULL!	1
575	4	2	2	#NULL!	#NULL!	#NULL!	#NULL!	#NULL!	#NULL!	#NULL!	2	64	1	1	0	0	2	1	3	2	1	2	3	2	1	1	1	1	1	2	60	4	2	1	1	58.45	0	1	0	3	0	#NULL!	#NULL!	2	0	#NULL!
576	3	2	2	32	24.81	#NULL!	56.81	2	5.681	2	1	65	1	0	1	1	2	1	3	2	1	2	3	2	1	1	#NULL!	#NULL!	#NULL!	2	60	4	2	1	1	30	1	0	0	2	0	1	#NULL!	1	#NULL!	1
577	2	2	2	80.9302	#NULL!	#NULL!	80.9302	2	3	1	1	64	1	1	1	1	2	1	3	2	1	2	3	2	1	1	1	3	1	2	60	4	2	1	1	13	1	1	0	0	0	#NULL!	#NULL!	1	0	0
578	4	2	2	#NULL!	#NULL!	#NULL!	#NULL!	#NULL!	#NULL!	#NULL!	1	74	2	1	0	0	2	1	3	2	2	2	4	2	1	1	1	1	1	1	60	4	2	1	1	41.89	0	2	0	1	0	#NULL!	#NULL!	1	0	#NULL!
579	2	2	2	39.2675	0	#NULL!	39.2675	2	4	1	1	73	2	0	1	1	2	1	3	2	0	1	1	1	1	1	1	5	2	1	59	4	2	1	1	47	0	0	0	0	0	#NULL!	#NULL!	1	0	0
580	3	2	2	17.7155	4.45	#NULL!	22.1655	1	2.21655	1	1	55	1	0	1	1	2	1	4	2	2	2	4	2	1	1	#NULL!	1	1	1	62	4	2	1	1	6	1	0	0	#NULL!	0	3	3		0	0
581	4	2	2	45.5188	13.01	#NULL!	58.5288	2	5.85288	2	1	51	1	1	1	1	2	1	4	2	1	2	4	2	0	0	#NULL!	#NULL!	#NULL!	#NULL!	60	4	2	1	1	9.49	1	2	0	0	0	#NULL!	#NULL!	2	0	1
582	5	2	2	10.8433	0	#NULL!	10.8433	1	4	1	2	69	2	0	1	1	2	1	3	2	0	1	3	2	1	1	1	#NULL!	#NULL!	2	60	4	2	1	1	25	0	#NULL!	#NULL!	#NULL!	#NULL!	#NULL!	#NULL!		0	0
583	3	2	2	39.5674	6.7	#NULL!	46.2674	2	4.62674	2	1	73	2	1	1	1	2	1	3	2	1	2	3	2	1	1	#NULL!	#NULL!	#NULL!	#NULL!	59	4	2	1	1	5	1	1	0	#NULL!	0	#NULL!	#NULL!	1	0	1
584	3	2	2	37.0921	3.36	#NULL!	40.4521	2	4.04521	1	1	66	2	1	1	1	2	1	3	2	1	2	3	2	0	0	#NULL!	#NULL!	#NULL!	#NULL!	50	1	1	0	#NULL!	6	1	0	2	#NULL!	0	1	#NULL!		0	0
585	3	2	2	#NULL!	#NULL!	#NULL!	#NULL!	#NULL!	#NULL!	#NULL!	1	65	1	0	1	1	2	1	2	1	2	2	3	2	1	1	#NULL!	#NULL!	#NULL!	2	60	4	2	1	1	36	1	0	0	#NULL!	0	#NULL!	#NULL!	2	#NULL!	#NULL!
586	3	2	2	11.8	115.28	#NULL!	127.08	2	12.708	2	1	48	1	1	1	1	2	1	3	2	2	2	3	2	0	0	#NULL!	#NULL!	#NULL!	#NULL!	50	1	1	0	#NULL!	25	1	0	0	1	0	1	#NULL!		#NULL!	1
587	2	2	2	71	#NULL!	#NULL!	71	2	3	1	1	72	2	0	1	1	2	1	3	2	2	2	3	2	1	1	1	7	2	2	54	2	1	0	#NULL!	64	0	0	0	0	0	#NULL!	#NULL!	1	#NULL!	0
588	3	2	2	27.2938	2.43	#NULL!	29.7238	1	2.97238	1	1	76	2	1	1	1	2	1	4	2	1	2	4	2	0	0	#NULL!	#NULL!	#NULL!	#NULL!	60	4	2	1	1	9	1	0	0	4	0	3	1	2	#NULL!	0
589	3	2	2	40.7777	12.75	#NULL!	53.5277	2	5.35277	2	1	57	1	0	1	1	2	1	4	2	1	2	4	2	1	1	#NULL!	#NULL!	#NULL!	1	60	4	2	1	1	10	1	2	0	#NULL!	0	1	#NULL!	2	0	1
590	4	2	2	#NULL!	#NULL!	#NULL!	#NULL!	#NULL!	#NULL!	#NULL!	1	48	1	1	1	1	2	1	3	2	3	2	4	2	1	1	1	1	1	1	50	1	1	0	#NULL!	36.18	1	1	0	0	0	#NULL!	#NULL!	2	#NULL!	#NULL!
591	3	2	2	28.7344	0	#NULL!	28.7344	1	2.87344	1	1	56	1	0	1	0	2	1	4	2	0	1	4	2	1	1	#NULL!	4	1	1	60	4	2	1	1	57	1	1	1	1	0	1	#NULL!	2	#NULL!	0
592	4	2	2	10.374	#NULL!	#NULL!	10.374	1	2	1	2	41	1	0	0	0	2	1	4	2	2	2	4	2	1	1	1	5	2	2	60	4	2	1	1	60.32	0	1	0	1	0	1	#NULL!	1	#NULL!	0
593	4	2	2	63.2244	#NULL!	#NULL!	63.2244	2	6.32244	2	2	63	1	0	1	0	2	1	4	2	3	2	4	2	1	1	1	1	1	1	54	2	1	0	#NULL!	13.04	1	0	0	0	0	#NULL!	#NULL!	1	#NULL!	1
594	1	1	2	59.7	0	#NULL!	59.7	2	7	2	2	61	1	0	1	0	2	1	3	1	0	1	2	1	1	1	#NULL!	3	1	2	63	4	3	1	2	126	1	0	0	4	0	#NULL!	#NULL!	1	#NULL!	1
595	1	2	2	44.7781	#NULL!	#NULL!	44.7781	2	6	2	1	48	1	0	1	0	2	1	4	2	1	2	4	2	1	1	#NULL!	4	1	2	62	4	2	1	1	42	0	0	0	2	0	#NULL!	#NULL!	2	0	1
596	4	1	2	65	0	#NULL!	65	2	6.5	2	1	65	1	1	1	1	2	1	2	1	0	1	2	1	1	1	1	1	1	1	50	1	1	0	#NULL!	0.95	0	0	0	3	0	#NULL!	#NULL!		0	1
597	5	2	2	50.3	#NULL!	#NULL!	50.3	2	5.03	2	1	60	1	0	1	0	2	1	4	2	2	2	4	2	1	1	1	#NULL!	#NULL!	1	50	1	1	0	#NULL!	8	0	3	#NULL!	#NULL!	0	#NULL!	#NULL!		0	1
598	3	2	2	#NULL!	#NULL!	#NULL!	#NULL!	#NULL!	#NULL!	#NULL!	1	61	1	0	1	0	2	1	2	1	2	2	3	2	1	1	#NULL!	#NULL!	#NULL!	2	60	4	2	1	1	14	1	0	0	2	0	#NULL!	#NULL!	2	0	#NULL!
599	3	2	2	68.5	0	#NULL!	68.5	2	6.85	2	1	54	1	0	1	0	2	1	3	2	0	1	3	2	1	1	#NULL!	#NULL!	#NULL!	#NULL!	60	4	2	1	1	18	1	1	0	#NULL!	0	3	1	1	0	1
600	2	2	2	#NULL!	#NULL!	#NULL!	#NULL!	#NULL!	7	2	2	68	2	1	0	0	2	1	2	1	0	1	1	1	1	1	1	#NULL!	#NULL!	1	64	5	3	1	2	56	0	1	0	0	0	#NULL!	#NULL!	1	0	1
601	1	2	2	17.0625	11.4553	#NULL!	28.5178	1	5.5	2	1	56	1	0	1	0	2	1	4	2	2	2	4	2	1	1	#NULL!	5	2	2	61	4	2	1	1	13	1	0	0	3	0	#NULL!	#NULL!	1	#NULL!	1
602	2	2	2	60.9679	#NULL!	#NULL!	60.9679	2	2	1	1	62	1	1	1	0	2	1	3	2	1	2	3	2	1	1	1	2	1	2	56	3	1	0	#NULL!	58	0	0	0	0	0	#NULL!	#NULL!	1	#NULL!	0
603	1	2	1	30.2	0	#NULL!	30.2	1	6	2	1	78	2	0	1	0	2	1	4	2	0	1	4	2	0	0	#NULL!	0	#NULL!	#NULL!	63	4	3	1	2	21	1	1	1	1	0	1	#NULL!	1	#NULL!	1
604	3	2	2	17.3401	0	#NULL!	17.3401	1	2	1	1	71	2	1	1	0	2	1	4	2	0	1	4	2	1	1	#NULL!	#NULL!	#NULL!	#NULL!	60	4	2	1	1	140	0	0	0	2	0	#NULL!	#NULL!	2	#NULL!	0
605	4	2	2	#NULL!	#NULL!	#NULL!	#NULL!	#NULL!	#NULL!	#NULL!	1	62	1	1	1	1	2	1	3	2	2	2	3	2	0	0	#NULL!	#NULL!	#NULL!	#NULL!	60	4	2	1	1	4.57	0	2	0	1	0	#NULL!	#NULL!	2	0	#NULL!
606	4	1	2	49.2	#NULL!	#NULL!	49.2	2	4.92	2	1	58	1	0	1	1	2	1	4	2	3	2	4	2	1	1	1	1	1	2	50	1	1	0	#NULL!	18.18	0	2	0	0	0	1	1	1	#NULL!	1
607	4	2	2	8.7019	#NULL!	#NULL!	8.7019	1	2	1	1	56	1	1	1	1	2	1	4	2	1	2	4	2	1	1	1	3	1	2	60	4	2	1	1	27.73	1	1	0	0	2	3	#NULL!	2	#NULL!	0
608	3	2	2	#NULL!	#NULL!	#NULL!	#NULL!	#NULL!	#NULL!	#NULL!	1	52	1	0	1	0	2	1	2	1	2	2	2	1	1	1	#NULL!	#NULL!	#NULL!	#NULL!	50	1	1	0	#NULL!	7	1	#NULL!	#NULL!	1	#NULL!	3	1	2	0	#NULL!
609	4	2	2	#NULL!	#NULL!	#NULL!	#NULL!	#NULL!	#NULL!	#NULL!	1	67	2	1	1	1	2	1	3	2	2	2	4	2	1	1	1	4	1	2	50	1	1	0	#NULL!	15.24	1	3	0	1	2	#NULL!	1	1	#NULL!	#NULL!
610	2	2	2	44.2	#NULL!	#NULL!	44.2	2	3	1	1	55	1	1	0	0	2	1	4	2	2	2	3	2	1	1	1	1	1	2	67	5	3	1	2	25	1	4	0	0	2	#NULL!	#NULL!	1	0	0
611	5	2	2	#NULL!	#NULL!	#NULL!	#NULL!	#NULL!	#NULL!	#NULL!	1	68	2	0	1	0	2	1	2	1	1	2	2	1	1	1	1	#NULL!	#NULL!	2	60	4	2	1	1	13	1	#NULL!	#NULL!	#NULL!	#NULL!	#NULL!	#NULL!		0	#NULL!
612	3	2	2	22.1328	20.9569	#NULL!	43.0897	2	4.30897	2	1	59	1	0	1	0	2	1	3	2	2	2	3	2	1	1	#NULL!	#NULL!	#NULL!	1	64	5	3	1	2	24	1	#NULL!	#NULL!	3	#NULL!	#NULL!	#NULL!	1	#NULL!	1
613	5	2	2	46.6884	0	#NULL!	46.6884	2	4.66884	2	1	64	1	#NULL!	1	0	2	1	3	2	0	1	3	2	1	1	1	#NULL!	#NULL!	1	66	5	3	1	2	8	1	#NULL!	#NULL!	#NULL!	#NULL!	#NULL!	#NULL!		0	1
614	3	2	2	58.7219	4.91	#NULL!	63.6319	2	6.36319	2	1	67	2	0	1	0	2	1	4	2	3	2	4	2	1	1	#NULL!	2	1	2	60	4	2	1	1	74	0	0	0	2	2	#NULL!	#NULL!	2	#NULL!	1
615	4	2	2	13.8	0	#NULL!	13.8	1	2	1	1	62	1	1	1	1	2	1	4	2	0	1	4	2	0	0	#NULL!	#NULL!	#NULL!	#NULL!	60	4	2	1	1	38.47	1	2	0	0	2	1	#NULL!		#NULL!	0
616	4	2	2	#NULL!	#NULL!	#NULL!	#NULL!	#NULL!	#NULL!	#NULL!	2	74	2	0	0	0	2	1	3	2	1	2	4	2	0	0	#NULL!	#NULL!	#NULL!	#NULL!	60	4	2	1	1	22.97	0	1	0	0	2	#NULL!	#NULL!		#NULL!	#NULL!
617	3	2	2	20.2422	7.26	#NULL!	27.5022	1	2.75022	1	1	63	1	0	1	0	2	1	4	2	2	2	4	2	0	0	#NULL!	#NULL!	#NULL!	#NULL!	60	4	2	1	1	5	1	0	0	3	2	1	#NULL!		0	0
618	4	2	2	#NULL!	#NULL!	#NULL!	#NULL!	#NULL!	#NULL!	#NULL!	1	58	1	1	1	1	2	1	3	2	2	2	3	2	1	1	1	5	2	2	48	1	1	0	#NULL!	10.78	0	2	0	3	2	#NULL!	#NULL!	1	#NULL!	#NULL!
619	4	2	2	133.773	#NULL!	#NULL!	133.773	2	13.3773	2	1	50	1	1	1	1	2	1	4	2	2	2	4	2	1	1	1	2	1	1	60	4	2	1	1	1.61	1	0	0	1	2	#NULL!	#NULL!	2	#NULL!	1
620	5	2	2	34.5699	#NULL!	#NULL!	34.5699	1	3.45699	1	1	67	2	#NULL!	1	0	2	1	4	2	1	2	4	2	1	1	1	#NULL!	#NULL!	2	66	5	3	1	2	65	0	#NULL!	#NULL!	#NULL!	#NULL!	#NULL!	#NULL!		0	0
621	5	2	2	20.6955	#NULL!	#NULL!	20.6955	1	2.06955	1	2	58	1	1	1	0	2	1	4	2	1	2	4	2	1	1	1	#NULL!	#NULL!	2	52	2	1	0	#NULL!	4	0	3	#NULL!	#NULL!	2	#NULL!	#NULL!		0	0
622	4	2	2	#NULL!	#NULL!	#NULL!	#NULL!	#NULL!	#NULL!	#NULL!	1	57	1	1	1	0	2	1	3	2	1	2	3	2	1	1	1	6	2	2	70	5	3	1	2	6.18	0	2	0	2	2	#NULL!	#NULL!	2	0	#NULL!
623	5	2	2	64.4	0	#NULL!	64.4	2	6.44	2	1	66	2	#NULL!	1	0	2	1	4	2	0	1	4	2	1	1	1	#NULL!	#NULL!	2	66	5	3	1	2	20	1	#NULL!	#NULL!	#NULL!	#NULL!	#NULL!	#NULL!		0	1
624	4	2	2	13.9	4.74728	#NULL!	18.6473	1	5	2	1	62	1	1	0	0	2	1	2	1	1	2	2	1	0	0	#NULL!	#NULL!	#NULL!	#NULL!	64	5	3	1	2	52.47	0	1	0	0	2	1	#NULL!		#NULL!	1
625	4	2	2	#NULL!	#NULL!	#NULL!	#NULL!	#NULL!	#NULL!	#NULL!	2	38	1	1	0	0	2	1	3	2	2	2	4	2	1	1	1	#NULL!	#NULL!	2	60	4	2	1	1	44.58	0	1	0	2	2	#NULL!	#NULL!	1	#NULL!	#NULL!
626	5	2	2	106.265	0	#NULL!	106.265	2	10.6265	2	1	62	1	#NULL!	1	0	2	1	3	2	0	1	3	2	1	1	1	#NULL!	#NULL!	2	64	5	3	1	2	9	1	#NULL!	#NULL!	#NULL!	#NULL!	#NULL!	#NULL!		0	1
627	4	2	2	#NULL!	#NULL!	#NULL!	#NULL!	#NULL!	#NULL!	#NULL!	1	59	1	0	1	1	2	1	1	1	0	1	1	1	1	1	1	3	1	1	48	1	1	0	#NULL!	26	0	2	0	1	2	#NULL!	#NULL!	2	#NULL!	#NULL!
628	3	2	2	#NULL!	#NULL!	#NULL!	#NULL!	#NULL!	#NULL!	#NULL!	1	53	1	1	1	0	2	1	2	1	2	2	2	1	1	1	#NULL!	#NULL!	#NULL!	2	60	4	2	1	1	49	1	2	0	#NULL!	2	#NULL!	#NULL!	1	#NULL!	#NULL!
629	4	2	2	#NULL!	#NULL!	#NULL!	15	1	2.7	#NULL!	1	62	1	1	1	1	2	1	3	2	2	2	3	2	1	1	1	1	1	1	50	1	1	0	#NULL!	0.56	0	2	0	1	2	#NULL!	#NULL!		0	#NULL!
630	5	2	2	65.0352	#NULL!	#NULL!	65.0352	2	6.50352	2	1	58	1	1	1	0	2	1	4	2	2	2	4	2	1	1	1	#NULL!	#NULL!	2	50	1	1	0	#NULL!	6	0	3	#NULL!	#NULL!	2	#NULL!	#NULL!		#NULL!	1
631	4	2	2	3.3092	#NULL!	#NULL!	3.3092	1	6	2	1	60	1	0	1	1	2	1	4	2	2	2	4	2	1	1	1	4	1	2	49	1	1	0	#NULL!	53.16	0	0	0	0	2	#NULL!	#NULL!	1	0	1
632	5	2	2	13.041	0	#NULL!	13.041	1	4	1	1	46	1	1	1	0	2	1	4	2	0	1	4	2	1	1	1	#NULL!	#NULL!	2	60	4	2	1	1	11	1	#NULL!	#NULL!	#NULL!	#NULL!	#NULL!	#NULL!		0	0
633	3	2	#NULL!	16.2699	7.73	#NULL!	23.9999	1	2.39999	1	1	79	2	1	1	0	2	1	4	2	1	2	4	2	0	0	#NULL!	#NULL!	#NULL!	#NULL!	54	2	1	0	#NULL!	32	1	2	0	#NULL!	2	#NULL!	#NULL!	1	#NULL!	0
634	4	2	1	#NULL!	#NULL!	#NULL!	#NULL!	#NULL!	#NULL!	#NULL!	1	64	1	1	1	0	2	1	3	2	1	2	3	2	0	0	#NULL!	#NULL!	#NULL!	#NULL!	50	1	1	0	#NULL!	5.95	0	2	0	1	2	#NULL!	#NULL!	1	0	#NULL!
635	2	2	1	27.3715	#NULL!	#NULL!	27.3715	1	2	1	1	57	1	1	1	0	2	1	3	2	2	2	3	2	1	1	1	4	1	2	63	4	3	1	2	40	0	0	0	0	2	#NULL!	#NULL!		0	0
636	4	1	#NULL!	#NULL!	#NULL!	#NULL!	#NULL!	#NULL!	#NULL!	#NULL!	1	76	2	0	0	0	2	1	3	2	2	2	3	2	0	0	#NULL!	#NULL!	#NULL!	#NULL!	60	4	2	1	1	7.26	0	2	0	0	2	1	#NULL!		#NULL!	#NULL!
637	3	1	1	#NULL!	#NULL!	#NULL!	#NULL!	#NULL!	#NULL!	#NULL!	1	61	1	1	1	0	2	1	2	1	2	2	2	1	1	1	#NULL!	#NULL!	#NULL!	2	60	4	2	1	1	41	0	3	3	#NULL!	2	3	1	2	#NULL!	#NULL!
638	4	1	1	#NULL!	#NULL!	#NULL!	#NULL!	#NULL!	#NULL!	#NULL!	1	74	2	1	1	1	2	1	3	2	2	2	3	2	0	0	#NULL!	#NULL!	#NULL!	#NULL!	60	4	2	1	1	22.64	0	0	0	0	2	1	#NULL!	2	#NULL!	#NULL!
639	3	1	1	74.8021	2.6671	#NULL!	77.4692	2	7.74692	2	1	59	1	1	1	0	2	1	4	2	1	1	4	2	1	1	#NULL!	4	1	2	60	4	2	1	1	77	0	0	0	1	2	#NULL!	#NULL!	2	#NULL!	1
640	4	1	1	37.0194	9.8	#NULL!	46.8194	2	4.68194	2	2	79	2	1	0	0	2	1	2	1	1	2	2	1	0	0	#NULL!	#NULL!	#NULL!	#NULL!	60	4	2	1	1	33.38	1	1	0	1	2	#NULL!	#NULL!		#NULL!	1
641	3	1	1	#NULL!	#NULL!	#NULL!	#NULL!	#NULL!	#NULL!	#NULL!	1	80	2	1	1	0	2	1	2	1	1	2	3	2	0	0	#NULL!	#NULL!	#NULL!	#NULL!	60	4	2	1	1	28	1	#NULL!	#NULL!	#NULL!	#NULL!	#NULL!	#NULL!	1	#NULL!	#NULL!
642	3	1	1	16.7	0	#NULL!	16.7	1	1	1	1	65	1	0	1	0	2	1	3	2	0	1	4	2	1	1	#NULL!	#NULL!	#NULL!	#NULL!	60	4	2	1	1	7	0	2	2	3	2	#NULL!	#NULL!	2	0	0
643	4	1	1	34.6679	#NULL!	#NULL!	34.6679	1	3.46679	1	1	68	2	1	1	1	2	1	4	2	1	2	4	2	0	0	#NULL!	#NULL!	#NULL!	#NULL!	60	4	2	1	1	16.72	0	2	0	0	2	#NULL!	#NULL!	1	0	0
644	5	2	1	15.0449	0	#NULL!	15.0449	1	1	1	1	61	1	1	1	0	2	1	3	2	0	1	3	2	1	1	1	#NULL!	#NULL!	2	60	4	2	1	1	64	1	#NULL!	#NULL!	#NULL!	#NULL!	#NULL!	#NULL!		0	0
645	4	1	1	#NULL!	#NULL!	#NULL!	#NULL!	#NULL!	#NULL!	#NULL!	1	56	1	0	0	1	2	1	3	2	1	2	3	2	1	1	1	2	1	2	50	1	1	0	#NULL!	18.73	0	2	0	1	2	#NULL!	#NULL!		0	#NULL!
646	1	1	1	44.1528	9.99	#NULL!	54.1428	2	5	2	1	72	2	0	1	0	2	1	3	2	2	2	3	2	1	1	#NULL!	3	1	2	62	4	2	1	1	45	1	1	1	2	2	3	1	1	#NULL!	1
647	1	1	1	19.6182	1.81	#NULL!	21.4282	1	6	2	2	61	1	0	1	0	2	1	3	2	1	2	3	2	1	1	#NULL!	4	1	2	64	5	3	1	2	16	1	1	0	3	2	3	3	1	#NULL!	1
648	3	1	1	44.8636	1.65	#NULL!	46.5136	2	4.65136	2	1	62	1	0	1	0	2	1	3	2	2	2	2	1	1	1	#NULL!	4	1	2	60	4	2	1	1	85	0	0	0	#NULL!	2	#NULL!	#NULL!	1	#NULL!	1
649	5	2	1	33.741	0	#NULL!	33.741	1	3.3741	1	1	67	2	#NULL!	1	0	2	1	4	2	0	1	4	2	1	1	1	#NULL!	#NULL!	2	64	5	3	1	2	24	1	#NULL!	#NULL!	#NULL!	#NULL!	#NULL!	#NULL!		0	0
650	4	2	1	65.6	2.08	#NULL!	67.68	2	6.768	2	1	68	2	0	1	1	2	1	4	2	1	2	4	2	1	1	1	4	1	2	60	4	2	1	1	1.54	0	1	0	1	2	#NULL!	#NULL!		#NULL!	1
651	4	1	1	#NULL!	#NULL!	#NULL!	#NULL!	#NULL!	#NULL!	#NULL!	1	64	1	1	1	1	2	1	3	2	2	2	3	2	0	0	#NULL!	#NULL!	#NULL!	#NULL!	60	4	2	1	1	13.21	1	2	0	0	2	1	#NULL!	1	#NULL!	#NULL!
652	3	1	1	15.3436	#NULL!	#NULL!	15.3436	1	2	1	1	61	1	0	1	0	2	1	4	2	2	2	4	2	1	1	#NULL!	#NULL!	#NULL!	#NULL!	60	4	2	1	1	19	1	0	0	1	2	3	2		#NULL!	0
653	4	2	1	44.2612	#NULL!	#NULL!	44.2612	2	4.42612	2	1	71	2	0	0	1	2	1	4	2	3	2	4	2	1	1	1	1	1	1	50	1	1	0	#NULL!	2.92	1	1	2	2	2	1	#NULL!	1	#NULL!	1
654	4	1	1	#NULL!	#NULL!	#NULL!	#NULL!	#NULL!	#NULL!	#NULL!	1	68	2	1	1	1	2	1	1	1	2	2	3	2	0	0	#NULL!	#NULL!	#NULL!	#NULL!	48	1	1	0	#NULL!	9.89	0	0	0	0	2	#NULL!	#NULL!	2	0	#NULL!
655	2	1	1	97.8358	4.62	#NULL!	102.456	2	3	1	1	57	1	1	0	0	2	1	3	2	2	2	3	2	1	1	1	2	1	2	61	4	2	1	1	42	1	1	0	3	2	#NULL!	#NULL!	1	#NULL!	0
656	5	2	1	19.7416	35.154	#NULL!	54.8956	2	5.48956	2	1	71	2	#NULL!	1	0	2	1	3	2	2	2	3	2	1	1	1	#NULL!	#NULL!	2	62	4	2	1	1	2	1	#NULL!	#NULL!	#NULL!	#NULL!	#NULL!	#NULL!		0	1
657	5	1	1	5.7625	0	#NULL!	5.7625	1	2	1	2	65	1	1	1	0	2	1	3	2	0	1	3	2	1	1	1	#NULL!	#NULL!	2	60	4	2	1	1	40	1	#NULL!	#NULL!	#NULL!	#NULL!	#NULL!	#NULL!		#NULL!	0
658	4	1	1	#NULL!	#NULL!	#NULL!	#NULL!	#NULL!	#NULL!	#NULL!	1	65	1	0	1	1	2	1	3	2	3	2	4	2	1	1	1	2	1	1	60	4	2	1	1	12.22	1	0	0	0	2	#NULL!	3	2	#NULL!	#NULL!
659	4	1	1	47.6575	#NULL!	#NULL!	47.6575	2	4.76575	2	2	65	1	1	0	0	2	1	4	2	2	2	4	2	0	0	#NULL!	#NULL!	#NULL!	#NULL!	60	4	2	1	1	26.02	1	3	0	1	2	#NULL!	#NULL!	2	#NULL!	1
660	5	2	1	8.5286	3.64	#NULL!	12.1686	1	2	1	1	60	1	#NULL!	1	0	2	1	4	2	2	2	4	2	1	1	1	#NULL!	#NULL!	2	66	5	3	1	2	7	1	#NULL!	#NULL!	#NULL!	#NULL!	#NULL!	#NULL!		#NULL!	0
661	5	1	1	57.6443	0	#NULL!	57.6443	2	5.76443	2	1	62	1	#NULL!	1	0	2	1	3	2	0	1	3	2	1	1	1	#NULL!	#NULL!	2	66	5	3	1	2	79	0	#NULL!	#NULL!	#NULL!	#NULL!	#NULL!	#NULL!		0	1
662	5	1	1	#NULL!	#NULL!	#NULL!	#NULL!	#NULL!	#NULL!	#NULL!	1	63	1	#NULL!	1	0	2	1	2	1	0	1	2	1	1	1	1	#NULL!	#NULL!	2	64	5	3	1	2	16	1	#NULL!	#NULL!	#NULL!	#NULL!	#NULL!	#NULL!		0	#NULL!
663	4	1	1	#NULL!	#NULL!	#NULL!	#NULL!	#NULL!	#NULL!	#NULL!	1	59	1	0	1	1	2	1	3	2	3	2	4	2	0	0	#NULL!	#NULL!	#NULL!	#NULL!	60	4	2	1	1	17.58	0	1	0	0	2	#NULL!	#NULL!	2	#NULL!	#NULL!
664	5	1	1	12.29	#NULL!	#NULL!	12.29	1	2	1	1	64	1	#NULL!	1	0	2	1	3	2	1	2	3	2	1	1	1	#NULL!	#NULL!	2	64	5	3	1	2	66	0	#NULL!	#NULL!	#NULL!	#NULL!	#NULL!	#NULL!		0	0
665	3	1	#NULL!	55.8632	#NULL!	#NULL!	55.8632	2	5.58632	2	1	90	2	1	1	0	2	1	4	2	1	2	4	2	0	0	#NULL!	#NULL!	#NULL!	#NULL!	50	1	1	0	#NULL!	8	1	0	0	#NULL!	2	#NULL!	#NULL!	2	0	1
666	3	1	1	128.421	1.72235	#NULL!	130.143	2	13.0143	2	1	74	2	0	1	0	2	1	4	2	2	2	4	2	0	0	#NULL!	#NULL!	#NULL!	#NULL!	66	5	3	1	2	10	1	0	0	#NULL!	2	#NULL!	#NULL!	2	0	1
667	4	2	1	35.7243	16.9331	#NULL!	52.6574	2	5.26574	2	1	77	2	1	0	0	2	1	4	2	1	2	4	2	1	1	1	1	1	1	60	4	2	1	1	5.19	0	2	0	0	2	#NULL!	#NULL!	2	0	1
668	4	1	1	17.3	#NULL!	#NULL!	17.3	1	2	1	1	52	1	1	1	1	2	1	4	2	3	2	4	2	1	1	1	1	1	1	60	4	2	1	1	14.92	0	1	0	0	2	2	#NULL!	1	#NULL!	0
669	3	1	1	#NULL!	#NULL!	#NULL!	#NULL!	#NULL!	#NULL!	#NULL!	1	61	1	0	1	0	2	1	1	1	1	2	3	2	1	1	#NULL!	#NULL!	#NULL!	#NULL!	60	4	2	1	1	52	0	3	0	#NULL!	2	2	#NULL!	1	#NULL!	#NULL!
670	3	1	1	37.4023	11.196	#NULL!	48.5983	2	4.85983	2	1	52	1	0	1	0	2	1	3	2	3	2	3	2	1	1	#NULL!	4	1	2	60	4	2	1	1	33	1	0	#NULL!	#NULL!	2	#NULL!	#NULL!	2	#NULL!	1
671	3	1	1	#NULL!	#NULL!	#NULL!	#NULL!	#NULL!	#NULL!	#NULL!	1	67	2	0	1	0	2	1	2	1	1	2	3	2	1	1	#NULL!	#NULL!	#NULL!	#NULL!	60	4	2	1	1	17	0	1	0	1	2	#NULL!	#NULL!	1	0	#NULL!
672	1	1	1	17.4737	0	#NULL!	17.4737	1	3.6	1	1	80	2	0	1	0	2	1	4	2	0	1	4	2	0	0	#NULL!	0	#NULL!	#NULL!	60	4	2	1	1	39	1	1	#NULL!	1	2	#NULL!	#NULL!	2	0	0
673	1	1	1	18.0121	#NULL!	#NULL!	18.0121	1	3.5	1	1	70	2	0	1	0	2	1	4	2	1	2	4	2	1	1	#NULL!	3	1	2	62	4	2	1	1	33	0	1	0	2	2	#NULL!	#NULL!	1	0	0
674	4	1	1	#NULL!	#NULL!	#NULL!	#NULL!	#NULL!	#NULL!	#NULL!	1	58	1	0	1	1	2	1	3	2	2	2	4	2	1	1	1	2	1	2	60	4	2	1	1	15.47	1	1	0	4	2	1	#NULL!	1	#NULL!	#NULL!
675	5	1	1	64.4957	#NULL!	#NULL!	64.4957	2	6.44957	2	1	57	1	1	1	0	2	1	4	2	1	2	4	2	1	1	1	#NULL!	#NULL!	2	60	4	2	1	1	12	1	#NULL!	#NULL!	#NULL!	#NULL!	#NULL!	#NULL!		#NULL!	1
676	4	1	1	#NULL!	#NULL!	#NULL!	#NULL!	#NULL!	#NULL!	#NULL!	1	55	1	0	1	1	2	1	3	2	2	2	3	2	1	1	1	5	2	2	60	4	2	1	1	15.38	1	2	0	1	2	3	1	1	#NULL!	#NULL!
677	5	2	1	28.9648	0	#NULL!	28.9648	1	2.89648	1	1	61	1	#NULL!	1	0	2	1	4	2	0	1	4	2	1	1	1	#NULL!	#NULL!	2	66	5	3	1	2	6	1	#NULL!	#NULL!	#NULL!	#NULL!	#NULL!	#NULL!		0	0
678	3	1	1	45.3681	6.19	#NULL!	51.5581	2	5.15581	2	1	68	2	1	1	0	2	1	4	2	2	2	4	2	0	0	#NULL!	#NULL!	#NULL!	#NULL!	50	1	1	0	#NULL!	18	1	1	0	2	2	1	#NULL!	2	#NULL!	1
679	4	1	1	#NULL!	#NULL!	#NULL!	#NULL!	#NULL!	#NULL!	#NULL!	1	55	1	1	1	1	2	1	3	2	3	2	4	2	1	1	1	1	1	2	60	4	2	1	1	19	1	2	0	2	2	#NULL!	#NULL!	1	#NULL!	#NULL!
680	5	1	1	#NULL!	#NULL!	#NULL!	#NULL!	#NULL!	#NULL!	#NULL!	1	71	2	1	1	0	2	1	1	1	0	1	3	2	1	1	1	#NULL!	#NULL!	2	60	4	2	1	1	15	0	#NULL!	#NULL!	#NULL!	#NULL!	#NULL!	#NULL!		0	#NULL!
681	4	1	1	#NULL!	#NULL!	#NULL!	#NULL!	#NULL!	#NULL!	#NULL!	1	67	2	1	1	0	2	1	3	2	2	2	3	2	0	0	#NULL!	#NULL!	#NULL!	#NULL!	60	4	2	1	1	21.52	1	1	0	1	2	1	#NULL!	2	#NULL!	#NULL!
682	3	1	1	7.7555	#NULL!	#NULL!	7.7555	1	2	1	1	73	2	1	1	0	2	1	4	2	1	2	4	2	0	0	#NULL!	#NULL!	#NULL!	#NULL!	60	4	2	1	1	93	1	0	0	#NULL!	2	1	#NULL!		#NULL!	0
683	4	1	#NULL!	14.7751	0	#NULL!	14.7751	1	2	1	2	80	2	1	0	0	2	1	2	2	0	1	2	1	0	0	#NULL!	#NULL!	#NULL!	#NULL!	50	1	1	0	#NULL!	21.49	1	2	0	1	2	#NULL!	#NULL!	2	0	0
684	1	1	1	28.4865	4.62	#NULL!	33.1065	1	4	1	2	76	2	0	0	0	2	1	3	2	2	2	3	2	0	0	#NULL!	0	#NULL!	#NULL!	58	3	1	0	#NULL!	50	0	2	0	2	2	#NULL!	#NULL!	1	0	0
685	1	2	1	67	0	#NULL!	67	2	4	1	1	44	1	0	0	0	2	1	4	2	0	1	4	2	1	1	#NULL!	2	1	2	66	5	3	1	2	7	1	2	0	2	2	#NULL!	#NULL!	1	#NULL!	0
686	3	1	1	34.9665	4.32	#NULL!	39.2865	2	3.92865	1	1	62	1	0	1	0	2	1	3	2	2	2	3	2	0	0	#NULL!	#NULL!	#NULL!	#NULL!	60	4	2	1	1	9	1	0	0	#NULL!	2	1	#NULL!		#NULL!	0
687	3	2	1	#NULL!	#NULL!	#NULL!	#NULL!	#NULL!	#NULL!	#NULL!	1	45	1	0	1	0	2	1	4	2	0	1	4	2	1	1	#NULL!	4	1	1	50	1	1	0	#NULL!	7	1	0	0	#NULL!	2	#NULL!	#NULL!	2	0	#NULL!
688	3	1	1	28.9769	#NULL!	#NULL!	28.9769	1	2.89769	1	1	67	2	1	0	0	2	1	3	2	3	2	3	2	1	1	#NULL!	#NULL!	#NULL!	#NULL!	60	4	2	1	1	67	1	0	0	#NULL!	2	#NULL!	#NULL!		#NULL!	0
689	4	1	1	57.4939	#NULL!	#NULL!	57.4939	2	5.74939	2	1	62	1	1	1	0	2	1	4	2	1	2	4	2	1	1	1	2	1	2	60	4	2	1	1	8.57	0	0	0	2	2	#NULL!	#NULL!		0	1
690	4	2	#NULL!	#NULL!	#NULL!	#NULL!	#NULL!	#NULL!	#NULL!	#NULL!	1	52	1	1	1	1	2	1	3	2	1	2	3	2	1	1	1	1	1	1	56	3	1	0	#NULL!	4.3	0	1	0	2	2	#NULL!	#NULL!		#NULL!	#NULL!
691	3	1	#NULL!	15.4	6.40019	#NULL!	21.8002	1	2.18002	1	1	62	1	0	1	0	2	1	3	2	2	2	3	2	1	1	#NULL!	#NULL!	#NULL!	2	60	4	2	1	1	10	1	0	0	1	2	#NULL!	#NULL!		0	0
692	5	1	#NULL!	45.6478	0	#NULL!	45.6478	2	4.56478	2	2	82	2	#NULL!	0	0	2	1	3	2	0	1	3	2	1	1	1	#NULL!	#NULL!	1	60	4	2	1	1	8	1	#NULL!	#NULL!	#NULL!	#NULL!	#NULL!	#NULL!		0	1
693	5	1	#NULL!	84.1719	#NULL!	#NULL!	84.1719	2	8.41719	2	1	52	1	#NULL!	0	0	2	1	4	2	1	2	4	2	1	1	1	#NULL!	#NULL!	2	60	4	2	1	1	21	1	#NULL!	#NULL!	#NULL!	#NULL!	#NULL!	#NULL!		#NULL!	1
694	4	1	#NULL!	15.5	#NULL!	#NULL!	15.5	1	2	1	1	61	1	1	1	1	2	1	2	1	2	2	3	2	1	1	#NULL!	#NULL!	#NULL!	#NULL!	60	4	2	1	1	39.43	0	2	0	2	2	#NULL!	#NULL!	2	0	0
695	2	1	#NULL!	25.4645	0	#NULL!	25.4645	1	4	1	1	65	1	0	0	0	2	1	3	2	0	1	2	1	1	1	1	1	1	2	59	4	2	1	1	31	0	0	0	4	2	#NULL!	#NULL!	1	0	0
696	5	1	#NULL!	101.58	0	#NULL!	101.58	2	10.158	2	1	66	2	1	0	0	2	1	4	2	0	1	4	2	1	1	1	#NULL!	#NULL!	2	70	5	3	1	2	9	1	#NULL!	#NULL!	#NULL!	#NULL!	#NULL!	#NULL!		0	1
697	3	1	#NULL!	15.9	7.19	#NULL!	23.09	1	2.309	1	1	62	1	#NULL!	1	0	2	1	4	2	1	2	4	2	1	1	#NULL!	#NULL!	#NULL!	2	60	4	2	1	1	10	1	2	0	#NULL!	2	1	#NULL!	1	#NULL!	0
698	3	2	#NULL!	#NULL!	#NULL!	#NULL!	48.4085	2	5	2	1	65	1	0	1	0	2	1	2	1	1	2	1	1	1	1	#NULL!	#NULL!	#NULL!	2	60	4	2	1	1	56	1	#NULL!	#NULL!	1	#NULL!	2	#NULL!	1	#NULL!	1
699	3	1	#NULL!	#NULL!	#NULL!	#NULL!	#NULL!	#NULL!	#NULL!	#NULL!	1	76	2	0	1	0	2	1	2	1	1	2	2	1	1	1	#NULL!	#NULL!	#NULL!	#NULL!	60	4	2	1	1	14	1	0	#NULL!	#NULL!	2	#NULL!	#NULL!		#NULL!	#NULL!
700	4	1	1	21.85	1.66	#NULL!	23.51	1	2.351	1	1	54	1	1	0	1	2	1	4	2	1	2	4	2	1	1	1	4	1	2	58	3	1	0	#NULL!	21.29	0	2	0	0	2	#NULL!	#NULL!	1	#NULL!	0
701	4	1	1	24.0396	#NULL!	#NULL!	24.0396	1	2.40396	1	1	52	1	1	1	1	2	1	4	2	1	2	4	2	1	1	1	1	1	2	60	4	2	1	1	52.01	0	2	0	1	2	#NULL!	#NULL!	1	#NULL!	0
702	4	1	1	#NULL!	#NULL!	#NULL!	#NULL!	#NULL!	#NULL!	#NULL!	1	69	2	1	1	1	2	1	3	2	2	2	4	2	1	1	1	5	2	2	60	4	2	1	1	30.59	1	1	0	3	2	#NULL!	#NULL!	1	#NULL!	#NULL!
703	4	2	1	#NULL!	#NULL!	#NULL!	#NULL!	#NULL!	#NULL!	#NULL!	1	77	2	1	1	1	2	1	1	1	0	1	1	1	1	1	1	1	1	1	60	4	2	1	1	50.63	0	2	0	0	2	#NULL!	#NULL!		0	#NULL!
704	2	2	1	9.6	#NULL!	#NULL!	9.6	1	5	2	2	74	2	1	0	0	2	1	4	2	1	2	3	2	1	1	1	2	1	2	64	5	3	1	2	177	0	1	0	1	2	#NULL!	#NULL!	1	0	1
705	5	2	#NULL!	#NULL!	#NULL!	#NULL!	#NULL!	#NULL!	#NULL!	#NULL!	1	85	2	#NULL!	0	0	2	1	2	1	0	1	2	1	1	1	1	#NULL!	#NULL!	1	60	4	2	1	1	29	0	#NULL!	#NULL!	#NULL!	#NULL!	#NULL!	#NULL!		0	#NULL!
706	4	2	1	11.684	#NULL!	#NULL!	11.684	1	2	1	2	67	2	1	0	0	2	1	4	2	2	2	4	2	1	1	1	1	1	1	64	5	3	1	2	109	0	2	0	3	2	#NULL!	#NULL!		#NULL!	0
707	3	2	1	39.721	0	#NULL!	39.721	2	3.9721	1	1	72	2	1	0	0	2	1	4	1	0	1	4	2	0	0	#NULL!	#NULL!	#NULL!	#NULL!	70	5	3	1	2	13.63	0	0	0	#NULL!	2	1	#NULL!		#NULL!	0
708	3	2	1	49.4	#NULL!	#NULL!	49.4	2	4.94	2	1	63	1	0	1	0	2	1	3	2	1	2	3	2	1	1	#NULL!	4	1	#NULL!	60	4	2	1	1	15	1	0	#NULL!	#NULL!	2	2	#NULL!	1	#NULL!	1
709	3	2	1	81.9213	#NULL!	#NULL!	81.9213	2	8.19213	2	1	72	2	0	1	0	2	1	4	2	1	2	4	2	1	1	#NULL!	#NULL!	#NULL!	#NULL!	60	4	2	1	1	26	1	0	0	#NULL!	2	#NULL!	#NULL!	1	#NULL!	1
710	3	2	1	#NULL!	#NULL!	#NULL!	#NULL!	#NULL!	#NULL!	#NULL!	1	65	1	0	1	0	2	1	2	2	0	1	4	2	0	0	#NULL!	#NULL!	#NULL!	#NULL!	50	1	1	0	#NULL!	3	1	#NULL!	#NULL!	#NULL!	#NULL!	#NULL!	#NULL!	1	0	#NULL!
711	3	2	1	4.3809	13.9213	#NULL!	18.3022	1	3	1	1	78	2	0	0	0	2	1	3	2	2	2	2	1	1	1	#NULL!	#NULL!	#NULL!	#NULL!	66	5	3	1	2	103	0	0	0	#NULL!	2	#NULL!	#NULL!		#NULL!	0
712	5	2	1	23.9815	0	#NULL!	23.9815	1	2.39815	1	1	68	2	#NULL!	0	0	2	1	4	2	0	1	2	1	1	1	1	#NULL!	#NULL!	2	60	4	2	1	1	14	0	2	#NULL!	#NULL!	2	#NULL!	#NULL!		0	0
713	2	2	1	11.2	#NULL!	#NULL!	11.2	1	6	2	1	61	1	0	0	0	2	1	3	2	1	2	3	2	1	1	2	2	1	2	67	5	3	1	2	16	1	1	2	0	2	#NULL!	#NULL!	1	#NULL!	1
714	4	2	1	#NULL!	#NULL!	#NULL!	#NULL!	#NULL!	#NULL!	#NULL!	1	56	1	1	1	1	2	1	3	2	2	2	3	2	0	0	#NULL!	#NULL!	#NULL!	#NULL!	60	4	2	1	1	42.87	0	1	0	2	2	#NULL!	#NULL!	1	0	#NULL!
715	3	2	1	#NULL!	#NULL!	#NULL!	#NULL!	#NULL!	#NULL!	#NULL!	1	69	2	0	0	0	2	1	2	1	0	1	3	2	0	0	#NULL!	#NULL!	#NULL!	#NULL!	60	4	2	1	1	46	0	0	0	1	2	#NULL!	#NULL!	2	#NULL!	#NULL!
716	3	2	1	35.3042	2.68	#NULL!	37.9842	2	3.79842	1	1	70	2	0	1	0	2	1	4	2	2	2	4	2	1	1	#NULL!	#NULL!	#NULL!	2	50	1	1	0	#NULL!	3	1	0	0	#NULL!	2	3	1	1	0	0
717	3	2	1	#NULL!	#NULL!	#NULL!	#NULL!	#NULL!	#NULL!	#NULL!	1	60	1	1	1	0	2	1	1	1	0	1	1	1	1	1	#NULL!	#NULL!	#NULL!	#NULL!	60	4	2	1	1	15	1	0	0	1	2	#NULL!	#NULL!		0	#NULL!
718	3	2	1	71.0176	#NULL!	#NULL!	71.0176	2	7.10176	2	1	78	2	0	0	0	2	1	3	2	2	2	3	2	1	1	#NULL!	#NULL!	#NULL!	#NULL!	59	4	2	1	1	16	1	2	0	#NULL!	2	#NULL!	#NULL!		0	1
719	4	2	1	#NULL!	#NULL!	#NULL!	#NULL!	#NULL!	#NULL!	#NULL!	1	55	1	1	0	0	2	1	3	2	0	1	1	1	0	0	#NULL!	#NULL!	#NULL!	#NULL!	60	4	2	1	1	17.68	1	2	0	1	2	1	#NULL!		#NULL!	#NULL!
720	3	2	1	#NULL!	#NULL!	#NULL!	#NULL!	#NULL!	#NULL!	#NULL!	1	75	2	0	0	0	2	1	2	1	1	2	3	2	1	1	#NULL!	#NULL!	#NULL!	1	56	3	1	0	#NULL!	19	1	2	0	#NULL!	2	1	#NULL!	1	#NULL!	#NULL!
721	4	2	1	#NULL!	#NULL!	#NULL!	#NULL!	#NULL!	#NULL!	#NULL!	1	46	1	1	1	1	2	1	3	2	2	2	4	2	1	1	#NULL!	#NULL!	#NULL!	1	60	4	2	1	1	1.77	0	0	0	0	2	#NULL!	#NULL!	2	0	#NULL!
722	3	2	#NULL!	29.7617	0	#NULL!	29.7617	1	2.97617	1	1	76	2	0	0	0	2	1	4	2	0	1	4	2	1	1	#NULL!	#NULL!	#NULL!	#NULL!	50	1	1	0	#NULL!	28	1	0	0	1	2	#NULL!	#NULL!		#NULL!	0
723	1	2	1	42.699	74.66	#NULL!	117.359	2	5	2	1	59	1	0	0	0	2	1	4	2	3	2	4	2	1	1	#NULL!	4	1	2	62	4	2	1	1	16	1	1	0	1	2	3	5	1	#NULL!	1
724	4	2	1	#NULL!	#NULL!	#NULL!	#NULL!	#NULL!	#NULL!	#NULL!	1	65	1	0	1	1	2	1	3	2	2	2	3	2	0	0	#NULL!	#NULL!	#NULL!	#NULL!	60	4	2	1	1	32.53	0	2	0	0	2	#NULL!	#NULL!		0	#NULL!
725	3	2	1	#NULL!	#NULL!	#NULL!	#NULL!	#NULL!	#NULL!	#NULL!	1	58	1	0	1	0	2	1	2	1	1	2	3	2	0	0	#NULL!	#NULL!	#NULL!	#NULL!	63	4	3	1	2	8	1	0	0	#NULL!	2	#NULL!	#NULL!		#NULL!	#NULL!
726	5	2	1	138.996	0	#NULL!	138.996	2	13.8996	2	1	62	1	1	0	0	2	1	4	2	0	1	4	2	1	1	1	#NULL!	#NULL!	2	60	4	2	1	1	60	0	#NULL!	#NULL!	#NULL!	#NULL!	#NULL!	#NULL!		0	1
727	5	2	1	45.8	#NULL!	#NULL!	45.8	2	4.58	2	1	63	1	#NULL!	0	0	2	1	4	2	3	2	2	1	1	1	1	#NULL!	#NULL!	2	66	5	3	1	2	9	1	#NULL!	#NULL!	#NULL!	#NULL!	#NULL!	#NULL!		#NULL!	1
728	3	2	1	#NULL!	#NULL!	#NULL!	#NULL!	#NULL!	#NULL!	#NULL!	1	65	1	0	1	0	2	1	2	1	1	2	3	2	1	1	#NULL!	#NULL!	#NULL!	2	60	4	2	1	1	30	1	0	0	#NULL!	2	#NULL!	#NULL!	1	#NULL!	#NULL!
729	3	2	1	15.7	#NULL!	#NULL!	15.7	1	2	1	1	74	2	1	0	0	2	1	3	2	3	2	3	2	1	1	#NULL!	#NULL!	#NULL!	#NULL!	63	4	3	1	2	50	1	0	0	#NULL!	2	#NULL!	#NULL!		#NULL!	0
730	5	2	1	#NULL!	#NULL!	#NULL!	#NULL!	#NULL!	#NULL!	#NULL!	2	75	2	#NULL!	0	0	2	1	2	1	0	1	2	1	1	1	1	#NULL!	#NULL!	1	60	4	2	1	1	13	0	2	#NULL!	#NULL!	2	#NULL!	#NULL!		0	#NULL!
731	3	2	1	#NULL!	#NULL!	#NULL!	31.25	1	3	#NULL!	1	60	1	1	1	0	2	1	2	1	3	2	2	1	0	0	#NULL!	#NULL!	#NULL!	#NULL!	66	5	3	1	2	43	1	0	0	#NULL!	2	#NULL!	#NULL!		#NULL!	#NULL!
732	3	2	1	48.6179	#NULL!	#NULL!	48.6179	2	4.86179	2	1	60	1	0	1	0	2	1	3	2	1	2	3	2	1	1	#NULL!	4	1	#NULL!	70	5	3	1	2	19	1	3	#NULL!	#NULL!	2	2	#NULL!	1	#NULL!	1
733	1	2	1	7.02405	3.45	#NULL!	10.4741	1	4.5	2	1	54	1	0	0	0	2	1	4	2	2	2	4	2	1	1	#NULL!	4	1	2	63	4	3	1	2	48	1	1	0	3	2	2	#NULL!	1	#NULL!	1
734	2	2	1	45.7679	#NULL!	#NULL!	45.7679	2	4	1	1	71	2	1	1	0	2	1	3	2	2	2	3	2	1	1	1	2	1	2	60	4	2	1	1	6	1	0	0	0	2	#NULL!	#NULL!	2	#NULL!	0
735	4	2	1	#NULL!	#NULL!	#NULL!	#NULL!	#NULL!	#NULL!	#NULL!	1	80	2	1	0	0	2	1	3	2	1	2	3	2	0	0	#NULL!	#NULL!	#NULL!	#NULL!	58	3	1	0	#NULL!	27.07	1	2	0	1	2	#NULL!	#NULL!	2	#NULL!	#NULL!
736	3	2	1	#NULL!	#NULL!	#NULL!	#NULL!	#NULL!	#NULL!	#NULL!	1	64	1	0	1	0	2	1	2	1	2	1	2	1	1	1	#NULL!	#NULL!	#NULL!	#NULL!	66	5	3	1	2	98	1	1	3	#NULL!	2	1	#NULL!	2	#NULL!	#NULL!
737	5	2	#NULL!	#NULL!	#NULL!	#NULL!	#NULL!	#NULL!	#NULL!	#NULL!	2	82	2	#NULL!	0	0	2	1	2	1	0	1	2	1	1	1	1	#NULL!	#NULL!	1	60	4	2	1	1	26	0	#NULL!	#NULL!	#NULL!	#NULL!	#NULL!	#NULL!		0	#NULL!
738	4	2	1	19.7875	#NULL!	#NULL!	19.7875	1	2	1	1	60	1	0	0	0	2	1	4	2	2	2	4	2	0	0	#NULL!	#NULL!	#NULL!	#NULL!	59	4	2	1	1	6.14	1	0	0	0	2	1	#NULL!	2	#NULL!	0
739	5	2	1	27.9386	0	#NULL!	27.9386	1	2.79386	1	1	50	1	#NULL!	0	0	2	1	4	2	0	1	4	2	1	1	1	#NULL!	#NULL!	2	66	5	3	1	2	18	1	#NULL!	#NULL!	#NULL!	#NULL!	#NULL!	#NULL!		0	0
740	4	2	1	41.7787	#NULL!	#NULL!	41.7787	2	4.17787	1	1	68	2	1	0	0	2	1	2	1	2	2	3	2	1	1	1	1	1	1	60	4	2	1	1	11.73	0	0	0	1	2	#NULL!	#NULL!		0	0
741	5	2	1	52.4536	0	#NULL!	52.4536	2	5.24536	2	2	63	1	#NULL!	0	0	2	1	4	2	0	1	2	1	1	1	1	#NULL!	#NULL!	1	60	4	2	1	1	35	1	#NULL!	#NULL!	#NULL!	#NULL!	#NULL!	#NULL!		#NULL!	1
742	3	2	1	#NULL!	#NULL!	#NULL!	#NULL!	#NULL!	#NULL!	#NULL!	1	67	2	0	0	0	2	1	2	1	1	2	3	2	0	0	#NULL!	#NULL!	#NULL!	#NULL!	59	4	2	1	1	23	1	1	1	2	2	3	3		#NULL!	#NULL!
743	5	2	1	58.6941	#NULL!	#NULL!	58.6941	2	5.86941	2	1	56	1	#NULL!	0	0	2	1	4	2	1	2	4	2	1	1	1	#NULL!	#NULL!	2	60	4	2	1	1	12	0	3	#NULL!	#NULL!	2	#NULL!	#NULL!		#NULL!	1
744	4	2	#NULL!	#NULL!	#NULL!	#NULL!	#NULL!	#NULL!	#NULL!	#NULL!	1	80	2	1	1	0	2	1	3	2	2	2	3	2	1	1	#NULL!	#NULL!	#NULL!	#NULL!	60	4	2	1	1	48.46	1	1	0	0	2	#NULL!	#NULL!	1	#NULL!	#NULL!
745	3	2	#NULL!	35.281	#NULL!	#NULL!	35.281	2	3.5281	1	1	64	1	1	0	0	2	1	4	2	1	2	4	2	1	1	#NULL!	1	1	2	61	4	2	1	1	10	1	0	0	#NULL!	2	#NULL!	#NULL!		0	0
746	1	2	#NULL!	31.1	0	#NULL!	31.1	1	6	2	1	72	2	0	0	0	2	1	3	2	0	1	2	1	1	1	#NULL!	2	1	2	63	4	3	1	2	78	0	0	0	4	2	2	#NULL!	1	#NULL!	1
747	4	2	#NULL!	7.3423	#NULL!	#NULL!	7.3423	1	1	1	1	49	1	0	1	1	2	1	4	2	2	2	4	2	1	1	1	4	1	2	64	5	3	1	2	41.66	1	4	0	2	2	#NULL!	#NULL!	2	#NULL!	0
748	1	2	#NULL!	11.6325	#NULL!	#NULL!	11.6325	1	5.5	2	2	69	2	0	0	0	2	1	3	2	1	2	3	2	0	0	#NULL!	0	#NULL!	#NULL!	62	4	2	1	1	36	0	1	0	0	2	#NULL!	#NULL!	2	0	1
749	1	2	#NULL!	17.5496	#NULL!	#NULL!	17.5496	1	7	2	1	84	2	0	0	0	2	1	4	2	2	2	4	2	0	0	#NULL!	0	#NULL!	#NULL!	60	4	2	1	1	27	1	0	3	2	2	#NULL!	#NULL!	2	#NULL!	1
750	4	2	#NULL!	#NULL!	#NULL!	#NULL!	#NULL!	#NULL!	#NULL!	#NULL!	1	60	1	1	1	1	2	1	3	2	1	2	3	2	1	1	1	5	2	2	49	1	1	0	#NULL!	18.53	1	1	0	1	2	1	#NULL!	1	#NULL!	#NULL!
751	1	2	#NULL!	97.8801	#NULL!	#NULL!	97.8801	2	8	2	1	67	2	0	0	0	2	1	4	2	1	2	4	2	1	1	#NULL!	3	1	2	63	4	3	1	2	13	1	1	0	3	2	#NULL!	#NULL!	1	#NULL!	1
752	4	2	#NULL!	#NULL!	#NULL!	#NULL!	#NULL!	#NULL!	#NULL!	#NULL!	1	62	1	1	1	1	2	1	1	1	3	2	4	2	0	0	#NULL!	#NULL!	#NULL!	#NULL!	60	4	2	1	1	26.35	0	2	0	2	2	#NULL!	#NULL!		0	#NULL!
753	1	2	#NULL!	8.8223	0	#NULL!	8.8223	1	4	1	1	62	1	0	0	0	2	1	4	2	0	1	4	2	1	1	#NULL!	3	1	2	63	4	3	1	2	39	1	2	1	1	2	#NULL!	#NULL!	2	0	0
754	1	2	#NULL!	77.7632	#NULL!	#NULL!	77.7632	2	10	2	1	54	1	0	0	0	2	1	4	2	1	2	4	2	1	1	#NULL!	4	1	2	62	4	2	1	1	22	0	1	0	1	2	#NULL!	#NULL!	2	0	1
755	4	2	#NULL!	52.8	1.85	#NULL!	54.65	2	5.465	2	1	52	1	1	1	0	2	1	4	2	1	2	4	2	1	1	1	1	1	1	60	4	2	1	1	12.19	#NULL!	2	0	0	2	#NULL!	#NULL!	2	0	1
756	1	2	#NULL!	59.1519	4.91	#NULL!	64.0619	2	5	2	1	39	1	0	0	0	2	1	3	2	3	2	4	2	1	1	#NULL!	2	1	2	60	4	2	1	1	5	1	0	0	1	2	#NULL!	1	2	#NULL!	1
757	4	2	#NULL!	#NULL!	#NULL!	#NULL!	#NULL!	#NULL!	#NULL!	#NULL!	1	82	2	1	0	0	2	1	3	2	0	1	2	1	0	0	#NULL!	#NULL!	#NULL!	#NULL!	64	5	3	1	2	16.89	0	0	0	0	2	#NULL!	#NULL!		0	#NULL!
758	3	2	#NULL!	#NULL!	#NULL!	#NULL!	11.9172	1	3	#NULL!	1	72	2	1	0	0	2	1	2	1	1	2	2	1	0	0	#NULL!	#NULL!	#NULL!	#NULL!	60	4	2	1	1	88	0	0	0	#NULL!	2	#NULL!	#NULL!		#NULL!	#NULL!
759	1	2	#NULL!	44.2	0	#NULL!	44.2	2	8	2	1	57	1	0	0	0	2	1	4	2	0	1	4	2	1	1	#NULL!	4	1	2	62	4	2	1	1	82	1	0	0	3	2	3	3	1	#NULL!	1
760	1	2	#NULL!	23.2789	#NULL!	#NULL!	23.2789	1	6	2	2	55	1	0	0	0	2	1	4	2	1	2	4	2	1	1	#NULL!	4	1	2	62	4	2	1	1	32	1	0	0	2	2	#NULL!	#NULL!	2	0	1
761	1	2	1	42.0365	#NULL!	#NULL!	42.0365	2	8	2	2	79	2	0	0	0	2	1	4	2	2	2	4	2	1	1	#NULL!	1	1	2	60	4	2	1	1	10	1	1	1	3	2	#NULL!	#NULL!	1	0	1
762	1	2	#NULL!	9.6	1.92434	#NULL!	11.5243	1	2	1	1	69	2	0	0	0	2	1	4	2	1	2	4	2	1	1	#NULL!	4	1	2	62	4	2	1	1	60	1	1	0	3	2	1	#NULL!	1	#NULL!	0
763	4	2	#NULL!	#NULL!	#NULL!	#NULL!	#NULL!	#NULL!	#NULL!	#NULL!	1	48	1	0	1	1	2	1	3	2	2	2	3	2	0	0	#NULL!	#NULL!	#NULL!	#NULL!	60	4	2	1	1	10.81	0	1	0	0	2	#NULL!	#NULL!		#NULL!	#NULL!
764	4	2	#NULL!	#NULL!	#NULL!	#NULL!	#NULL!	#NULL!	#NULL!	#NULL!	2	68	2	0	0	0	2	1	3	2	2	2	3	2	1	1	1	4	1	2	60	4	2	1	1	14.09	1	1	0	1	2	3	#NULL!		#NULL!	#NULL!
765	4	2	#NULL!	#NULL!	#NULL!	#NULL!	#NULL!	#NULL!	#NULL!	#NULL!	1	65	1	0	1	1	2	1	3	2	0	1	2	1	1	1	1	2	1	2	60	4	2	1	1	27.5	0	2	0	3	2	1	#NULL!	2	#NULL!	#NULL!
766	4	2	#NULL!	128.172	#NULL!	#NULL!	128.172	2	12.8172	2	1	60	1	1	1	1	2	1	4	2	2	2	4	2	1	1	1	1	1	1	60	4	2	1	1	46.06	0	3	0	1	2	#NULL!	#NULL!	1	#NULL!	1
767	1	2	#NULL!	35.9454	0	#NULL!	35.9454	2	5	2	1	59	1	0	0	0	2	1	4	2	0	1	4	2	1	1	#NULL!	2	1	2	63	4	3	1	2	36	1	0	0	3	2	#NULL!	#NULL!	1	#NULL!	1
768	3	2	1	#NULL!	#NULL!	#NULL!	#NULL!	#NULL!	#NULL!	#NULL!	1	71	2	0	0	0	2	1	2	1	0	1	3	2	1	1	#NULL!	#NULL!	#NULL!	1	59	4	2	1	1	5	1	1	0	1	2	#NULL!	#NULL!	1	0	#NULL!
769	3	2	1	#NULL!	#NULL!	#NULL!	11	1	4	#NULL!	1	49	1	1	1	0	2	1	2	1	1	2	3	2	1	1	#NULL!	3	1	1	58	3	1	0	#NULL!	5	1	3	3	#NULL!	2	#NULL!	#NULL!	2	0	#NULL!
770	4	2	1	#NULL!	#NULL!	#NULL!	#NULL!	#NULL!	#NULL!	#NULL!	1	58	1	1	1	1	2	1	3	2	2	2	3	2	1	1	1	2	1	2	50	1	1	0	#NULL!	9.07	0	0	0	1	2	#NULL!	#NULL!		#NULL!	#NULL!
771	4	2	1	#NULL!	#NULL!	#NULL!	15	1	3	#NULL!	1	53	1	1	1	1	2	1	3	2	2	2	3	2	1	1	#NULL!	4	1	2	50	1	1	0	#NULL!	2.43	0	1	0	2	2	#NULL!	#NULL!	1	0	#NULL!
772	4	2	1	#NULL!	#NULL!	#NULL!	#NULL!	#NULL!	#NULL!	#NULL!	1	43	1	1	1	1	2	1	3	2	0	1	2	1	1	1	1	5	2	2	60	4	2	1	1	19.91	1	1	0	0	2	4	#NULL!	1	#NULL!	#NULL!
773	4	2	#NULL!	100.993	0	#NULL!	100.993	2	10.0993	2	1	85	2	1	0	0	2	1	4	2	0	1	4	2	0	0	#NULL!	#NULL!	#NULL!	#NULL!	60	4	2	1	1	55.1	0	1	0	0	2	#NULL!	#NULL!		0	1
774	4	2	1	#NULL!	#NULL!	#NULL!	#NULL!	#NULL!	#NULL!	#NULL!	1	61	1	1	1	1	2	1	3	2	1	2	3	2	1	1	1	5	2	2	60	4	2	1	1	19.22	1	0	0	0	2	1	#NULL!		#NULL!	#NULL!
775	4	2	#NULL!	#NULL!	#NULL!	#NULL!	#NULL!	#NULL!	#NULL!	#NULL!	2	76	2	1	0	0	2	1	3	2	1	2	3	2	0	0	#NULL!	#NULL!	#NULL!	#NULL!	60	4	2	1	1	66.33	0	0	0	1	2	#NULL!	#NULL!	1	0	#NULL!
776	5	2	#NULL!	#NULL!	#NULL!	#NULL!	#NULL!	#NULL!	#NULL!	#NULL!	1	76	2	#NULL!	0	0	2	1	2	1	1	2	2	1	1	1	1	#NULL!	#NULL!	2	64	5	3	1	2	66	0	#NULL!	#NULL!	#NULL!	#NULL!	1	#NULL!		0	#NULL!
777	2	2	1	34.7	0	#NULL!	34.7	1	2	1	1	62	1	1	1	0	2	1	4	2	0	1	3	2	1	1	1	5	2	2	60	4	2	1	1	29	1	0	0	1	2	#NULL!	#NULL!	1	#NULL!	0
778	2	2	1	7.3174	#NULL!	#NULL!	7.3174	1	7	2	1	62	1	0	0	0	2	1	3	2	2	2	3	2	1	1	1	4	1	2	60	4	2	1	1	67	0	2	0	2	2	#NULL!	#NULL!	1	0	1
779	4	2	1	#NULL!	#NULL!	#NULL!	#NULL!	#NULL!	#NULL!	#NULL!	1	64	1	0	1	1	2	1	3	2	2	2	4	2	1	1	1	5	2	2	60	4	2	1	1	9.26	1	2	0	2	2	1	#NULL!		#NULL!	#NULL!
780	3	2	1	30.0696	#NULL!	#NULL!	30.0696	1	3.00696	1	1	73	2	#NULL!	1	0	2	1	3	2	1	2	3	2	1	1	#NULL!	#NULL!	#NULL!	#NULL!	64	5	3	1	2	5	1	#NULL!	#NULL!	#NULL!	#NULL!	#NULL!	#NULL!		0	0
781	1	2	1	99.9259	6.77	#NULL!	106.696	2	5	2	2	73	2	0	0	0	2	1	4	2	1	2	4	2	1	1	#NULL!	1	1	2	60	4	2	1	1	45	1	1	0	2	2	2	#NULL!	1	#NULL!	1
782	5	2	1	#NULL!	#NULL!	#NULL!	#NULL!	#NULL!	#NULL!	#NULL!	1	54	1	#NULL!	0	0	2	1	4	2	3	2	4	2	1	1	1	#NULL!	#NULL!	2	64	5	3	1	2	12	1	#NULL!	#NULL!	#NULL!	#NULL!	#NULL!	#NULL!		#NULL!	#NULL!
783	1	2	1	70.0188	0	#NULL!	70.0188	2	6	2	1	56	1	0	0	0	2	1	3	2	0	1	2	1	1	1	#NULL!	3	1	2	63	4	3	1	2	65	0	1	0	2	2	#NULL!	#NULL!	1	0	1
784	5	2	1	30.9174	0	#NULL!	30.9174	1	3.09174	1	2	67	2	#NULL!	0	0	2	1	4	2	0	1	4	2	1	1	1	#NULL!	#NULL!	2	64	5	3	1	2	11	1	#NULL!	#NULL!	#NULL!	#NULL!	#NULL!	#NULL!		#NULL!	0
785	1	2	1	40.9122	0	#NULL!	40.9122	2	6	2	1	52	1	0	0	0	2	1	3	2	0	1	2	1	1	1	#NULL!	1	1	2	63	4	3	1	2	26	1	2	0	4	2	#NULL!	#NULL!	1	0	1
786	3	2	1	61.1349	20.91	#NULL!	82.0449	2	8.20449	2	1	52	1	#NULL!	1	0	2	1	4	2	2	2	4	2	1	1	#NULL!	#NULL!	#NULL!	#NULL!	60	4	2	1	1	8	1	#NULL!	#NULL!	#NULL!	#NULL!	3	1		0	1
787	3	2	1	#NULL!	#NULL!	#NULL!	#NULL!	#NULL!	#NULL!	#NULL!	1	77	2	1	1	0	2	1	2	1	3	2	3	2	1	1	#NULL!	#NULL!	#NULL!	1	60	4	2	1	1	10	1	3	0	#NULL!	2	1	#NULL!	2	0	#NULL!
788	5	2	#NULL!	35.9936	0	#NULL!	35.9936	2	3.59936	1	1	76	2	1	0	0	2	1	3	2	0	1	3	2	1	1	1	#NULL!	#NULL!	2	56	3	1	0	#NULL!	6	1	#NULL!	#NULL!	#NULL!	#NULL!	#NULL!	#NULL!		0	0
789	4	2	1	59.4295	#NULL!	#NULL!	59.4295	2	5.94295	2	1	61	1	0	0	0	2	1	4	2	2	2	4	2	1	1	1	1	1	1	60	4	2	1	1	33.68	0	2	0	1	2	#NULL!	#NULL!		0	1
790	1	2	1	44.6	1.05	#NULL!	45.65	2	6.2	2	1	65	1	0	0	0	2	1	2	1	1	2	2	1	1	1	#NULL!	6	2	2	63	4	3	1	2	15	1	0	0	2	2	3	1	1	#NULL!	1
791	1	2	1	21.4372	0	#NULL!	21.4372	1	3	1	2	68	2	0	0	0	2	1	4	2	0	1	4	2	1	1	#NULL!	1	1	2	63	4	3	1	2	63	0	2	0	0	2	#NULL!	#NULL!	1	0	0
792	4	2	1	#NULL!	#NULL!	#NULL!	#NULL!	#NULL!	#NULL!	#NULL!	1	50	1	0	1	0	2	1	3	2	2	2	4	2	1	1	1	6	2	2	60	4	2	1	1	21.72	1	2	0	0	2	1	#NULL!		#NULL!	#NULL!
793	5	2	#NULL!	25.115	#NULL!	#NULL!	25.115	1	2.5115	1	2	84	2	#NULL!	0	0	2	1	4	2	2	2	4	2	1	1	1	#NULL!	#NULL!	1	60	4	2	1	1	22	1	#NULL!	#NULL!	#NULL!	#NULL!	#NULL!	#NULL!		#NULL!	0
794	5	2	1	16.8062	0	#NULL!	16.8062	1	1	1	1	58	1	#NULL!	0	0	2	1	4	2	0	1	4	2	1	1	1	#NULL!	#NULL!	2	66	5	3	1	2	77	0	#NULL!	#NULL!	#NULL!	#NULL!	#NULL!	#NULL!		#NULL!	0
795	3	2	1	24.1	2.47467	#NULL!	26.5747	1	2.65747	1	1	59	1	0	1	0	2	1	3	2	2	2	3	2	1	1	#NULL!	#NULL!	#NULL!	2	60	4	2	1	1	17	1	#NULL!	#NULL!	2	#NULL!	4	#NULL!		0	0
796	3	2	1	71.0951	#NULL!	#NULL!	71.0951	2	7.10951	2	1	58	1	1	1	0	2	1	3	2	2	2	4	2	1	1	#NULL!	#NULL!	#NULL!	2	60	4	2	1	1	13	1	2	0	#NULL!	2	3	1	1	#NULL!	1
797	5	2	1	58.7056	0	#NULL!	58.7056	2	5.87056	2	2	68	2	#NULL!	0	0	2	1	4	2	0	1	4	2	1	1	1	#NULL!	#NULL!	2	66	5	3	1	2	10	1	#NULL!	#NULL!	#NULL!	#NULL!	#NULL!	#NULL!		#NULL!	1
798	4	2	1	43.4	3.2	#NULL!	46.6	2	4.66	2	1	64	1	0	0	1	2	1	4	2	1	2	4	2	1	1	1	1	1	2	60	4	2	1	1	8.8	0	1	0	2	2	#NULL!	#NULL!		0	1
799	5	2	1	25.1342	#NULL!	#NULL!	25.1342	1	2.51342	1	2	78	2	1	0	0	2	1	4	2	1	2	4	2	1	1	1	#NULL!	#NULL!	1	50	1	1	0	#NULL!	13	0	1	#NULL!	#NULL!	2	#NULL!	#NULL!		0	0
800	4	2	1	22.2282	#NULL!	#NULL!	22.2282	1	2.22282	1	1	69	2	0	0	1	2	1	4	2	1	2	4	2	0	0	#NULL!	#NULL!	#NULL!	#NULL!	60	4	2	1	1	23.43	1	2	0	0	1	1	#NULL!	2	#NULL!	0
801	2	2	1	153.7	0	#NULL!	153.7	2	3	1	1	62	1	0	0	0	2	1	3	2	0	1	1	1	1	1	1	2	1	2	50	1	1	0	#NULL!	7	0	1	1	3	1	#NULL!	#NULL!	1	0	0
802	4	2	1	45	1.17	#NULL!	46.17	2	4.617	2	1	53	1	0	1	1	2	1	2	1	1	2	2	1	1	1	1	2	1	2	60	4	2	1	1	26.45	1	2	0	2	1	1	#NULL!	2	#NULL!	1
803	4	2	1	#NULL!	#NULL!	#NULL!	#NULL!	#NULL!	#NULL!	#NULL!	2	74	2	1	0	0	2	1	3	2	2	2	4	2	1	1	1	1	1	1	50	1	1	0	#NULL!	17.68	0	0	0	0	1	#NULL!	#NULL!	1	#NULL!	#NULL!
804	3	2	1	#NULL!	#NULL!	#NULL!	#NULL!	#NULL!	#NULL!	#NULL!	1	62	1	0	0	0	2	1	2	1	2	2	2	1	1	1	#NULL!	4	1	2	66	5	3	1	2	43	0	0	0	2	3	#NULL!	#NULL!		#NULL!	#NULL!
805	5	2	1	16.1914	0	#NULL!	16.1914	1	1	1	1	70	2	#NULL!	0	0	2	1	4	2	0	1	4	2	1	1	1	#NULL!	#NULL!	2	66	5	3	1	2	73	0	#NULL!	#NULL!	#NULL!	#NULL!	#NULL!	#NULL!		0	0
806	4	2	1	#NULL!	#NULL!	#NULL!	#NULL!	#NULL!	#NULL!	#NULL!	2	70	2	1	0	0	2	1	3	2	3	2	4	2	1	1	1	1	1	1	60	4	2	1	1	18.53	1	2	0	0	1	1	#NULL!	1	#NULL!	#NULL!
807	5	2	1	84.0238	#NULL!	#NULL!	84.0238	2	8.40238	2	2	65	1	#NULL!	0	0	2	1	4	2	3	2	2	1	1	1	1	#NULL!	#NULL!	2	64	5	3	1	2	81	0	#NULL!	#NULL!	#NULL!	#NULL!	#NULL!	#NULL!		0	1
808	5	2	1	73.9816	0	#NULL!	73.9816	2	7.39816	2	1	71	2	#NULL!	0	0	2	1	4	2	0	1	4	2	1	1	1	#NULL!	#NULL!	2	60	4	2	1	1	17	1	#NULL!	#NULL!	#NULL!	#NULL!	#NULL!	#NULL!		0	1
809	4	2	1	#NULL!	#NULL!	#NULL!	#NULL!	#NULL!	#NULL!	#NULL!	1	68	2	1	1	1	2	1	3	2	3	2	4	2	1	1	1	4	1	2	60	4	2	1	1	33.02	1	2	0	1	1	4	#NULL!	2	#NULL!	#NULL!
810	5	2	1	25.7008	0	#NULL!	25.7008	1	2.57008	1	1	60	1	#NULL!	0	0	2	1	4	2	0	1	2	1	1	1	1	#NULL!	#NULL!	2	64	5	3	1	2	12	1	#NULL!	#NULL!	#NULL!	#NULL!	#NULL!	#NULL!		0	0
811	4	2	1	#NULL!	#NULL!	#NULL!	#NULL!	#NULL!	#NULL!	#NULL!	1	72	2	1	1	1	2	1	3	2	2	2	3	2	1	1	1	2	1	2	50	1	1	0	#NULL!	8.48	0	2	0	0	1	#NULL!	#NULL!		0	#NULL!
812	4	2	1	23.4273	#NULL!	#NULL!	23.4273	1	2.34273	1	1	64	1	1	1	1	2	1	2	1	3	2	4	2	1	1	1	5	2	2	50	1	1	0	#NULL!	3.15	0	2	0	2	1	#NULL!	#NULL!		0	0
813	1	2	1	62.7694	7.29	#NULL!	70.0594	2	7	2	1	45	1	0	0	0	2	1	4	2	1	2	4	2	1	1	#NULL!	2	1	2	60	4	2	1	1	5	1	1	1	0	1	1	#NULL!	1	#NULL!	1
814	5	2	#NULL!	#NULL!	#NULL!	#NULL!	#NULL!	#NULL!	#NULL!	#NULL!	1	76	2	1	0	0	2	1	2	1	0	1	2	1	1	1	1	#NULL!	#NULL!	1	50	1	1	0	#NULL!	4	0	3	#NULL!	#NULL!	1	#NULL!	#NULL!		0	#NULL!
815	1	2	1	5.2	3.29	#NULL!	8.49	1	4	1	1	46	1	0	0	0	2	1	3	2	1	2	3	2	1	1	#NULL!	4	1	2	60	4	2	1	1	75	0	1	0	2	1	#NULL!	#NULL!	1	0	0
816	4	2	1	126.994	#NULL!	#NULL!	126.994	2	12.6994	2	1	39	1	1	0	0	2	1	4	2	3	2	4	2	1	1	#NULL!	#NULL!	#NULL!	#NULL!	60	4	2	1	1	48.03	1	3	0	0	2	#NULL!	1	1	#NULL!	1
817	5	2	1	28.4375	#NULL!	#NULL!	28.4375	1	2.84375	1	1	66	2	#NULL!	0	0	2	1	4	2	1	2	4	2	1	1	1	#NULL!	#NULL!	2	64	5	3	1	2	6	1	#NULL!	#NULL!	#NULL!	#NULL!	#NULL!	#NULL!		0	0
818	5	2	1	132.154	#NULL!	#NULL!	132.154	2	13.2154	2	1	66	2	#NULL!	0	0	2	1	4	2	1	2	4	2	1	1	1	#NULL!	#NULL!	2	64	5	3	1	2	6	1	#NULL!	#NULL!	#NULL!	#NULL!	#NULL!	#NULL!		0	1
819	1	2	1	68.668	#NULL!	#NULL!	68.668	2	5	2	2	62	1	0	0	0	2	1	4	2	1	2	4	2	1	1	#NULL!	2	1	2	70	5	3	1	2	14	1	2	1	1	0	#NULL!	#NULL!	2	0	1
820	1	2	1	68.668	#NULL!	#NULL!	68.668	2	5	2	2	62	1	0	0	0	2	1	4	2	1	2	4	2	1	1	#NULL!	2	1	2	70	5	3	1	2	14	1	1	1	1	0	#NULL!	#NULL!	2	0	1
821	1	2	1	13.2506	8.17	#NULL!	21.4206	1	6	2	2	64	1	0	0	0	2	1	3	2	2	2	3	2	1	1	#NULL!	3	1	2	63	4	3	1	2	66	0	1	0	2	0	#NULL!	#NULL!	1	0	1
822	1	2	1	23.6267	#NULL!	#NULL!	23.6267	1	4	1	2	79	1	0	0	0	2	1	4	2	1	2	4	2	0	0	#NULL!	0	#NULL!	#NULL!	62	4	2	1	1	5	1	1	1	1	0	#NULL!	#NULL!	2	0	0
823	3	2	1	16.1142	#NULL!	#NULL!	16.1142	1	1	1	1	69	2	0	0	0	2	1	4	2	3	2	4	2	0	0	#NULL!	#NULL!	#NULL!	#NULL!	66	5	3	1	2	18	1	0	0	#NULL!	0	1	#NULL!	2	0	0
824	3	2	1	15.2	#NULL!	#NULL!	15.2	1	1	1	1	63	2	0	0	0	2	1	3	2	1	2	3	2	1	1	#NULL!	4	1	#NULL!	60	4	2	1	1	73	1	1	0	#NULL!	0	#NULL!	#NULL!		#NULL!	0
825	5	2	1	44.5614	3.92872	#NULL!	48.4901	2	4.84901	2	1	58	1	#NULL!	0	0	2	1	4	2	2	2	4	2	1	1	1	#NULL!	#NULL!	2	66	5	3	1	2	5	1	#NULL!	#NULL!	#NULL!	#NULL!	#NULL!	#NULL!		0	1
826	3	2	1	#NULL!	#NULL!	#NULL!	#NULL!	#NULL!	#NULL!	#NULL!	1	80	2	1	0	0	2	1	2	1	2	2	1	1	0	0	#NULL!	#NULL!	#NULL!	#NULL!	59	4	2	1	1	50	1	#NULL!	#NULL!	1	#NULL!	#NULL!	#NULL!		#NULL!	#NULL!
827	4	2	1	16.8886	#NULL!	#NULL!	16.8886	1	1	1	1	67	2	0	1	1	2	1	4	2	2	2	4	2	0	0	#NULL!	#NULL!	#NULL!	#NULL!	60	4	2	1	1	23.06	1	1	0	0	0	#NULL!	3	2	#NULL!	0
828	3	2	1	35.1542	0	#NULL!	35.1542	2	3.51542	1	1	67	1	1	1	0	2	1	4	2	0	1	4	2	1	1	#NULL!	2	1	#NULL!	60	4	2	1	1	6	1	2	1	2	0	3	3	1	0	0
829	4	2	1	32.9697	#NULL!	#NULL!	32.9697	1	3.29697	1	1	66	2	1	0	1	2	1	4	2	2	2	4	2	1	1	1	2	1	2	50	1	1	0	#NULL!	7.82	0	3	0	0	3	#NULL!	#NULL!		0	0
830	4	2	1	21.48	#NULL!	#NULL!	21.48	1	2.148	1	1	48	1	1	0	1	2	1	2	1	2	2	4	2	0	0	#NULL!	#NULL!	#NULL!	#NULL!	60	4	2	1	1	6.7	0	0	0	0	3	#NULL!	#NULL!		#NULL!	0
831	1	2	1	37	5.54	#NULL!	42.54	2	5	2	2	57	1	0	0	0	2	1	3	2	2	2	3	2	1	1	#NULL!	2	1	2	63	4	3	1	2	58	1	2	0	2	3	#NULL!	#NULL!	1	0	1
832	5	2	1	58.6666	0	#NULL!	58.6666	2	5.86666	2	1	74	2	#NULL!	0	0	2	1	4	2	0	1	4	2	1	1	1	#NULL!	#NULL!	1	64	5	3	1	2	14.03	0	#NULL!	#NULL!	#NULL!	#NULL!	#NULL!	#NULL!		#NULL!	1
833	4	2	1	#NULL!	#NULL!	#NULL!	#NULL!	#NULL!	#NULL!	#NULL!	1	72	2	1	1	0	2	1	3	2	2	2	3	2	1	1	1	1	1	1	60	4	2	1	1	28.62	0	2	0	2	3	#NULL!	#NULL!		0	#NULL!
834	2	2	1	21.4372	41.57	#NULL!	63.0072	2	3	1	1	65	1	0	0	0	2	1	4	2	1	2	3	2	1	1	1	2	1	2	60	4	2	1	1	21	1	0	0	0	3	#NULL!	#NULL!	1	#NULL!	0
835	2	2	1	8.9438	#NULL!	#NULL!	8.9438	1	2	1	1	49	1	1	1	0	2	1	3	2	2	2	3	2	1	1	1	4	1	2	60	4	2	1	1	43	0	0	0	1	3	#NULL!	#NULL!	1	0	0
836	2	2	1	87.8501	0	#NULL!	87.8501	2	4	1	1	62	1	1	0	0	2	1	3	2	0	1	1	1	1	1	1	2	1	2	50	1	1	0	#NULL!	16	0	0	0	1	3	#NULL!	#NULL!	1	0	0
837	4	2	1	34.3704	#NULL!	#NULL!	34.3704	1	3.43704	1	1	36	1	0	0	0	2	1	4	2	2	2	4	2	0	0	#NULL!	#NULL!	#NULL!	#NULL!	60	4	2	1	1	27.07	1	1	0	0	3	#NULL!	#NULL!	2	0	0
838	3	2	1	#NULL!	#NULL!	#NULL!	21.2708	1	3	#NULL!	1	49	2	0	0	0	2	1	2	1	1	2	1	1	0	0	#NULL!	#NULL!	#NULL!	#NULL!	60	4	2	1	1	72	1	1	0	#NULL!	3	#NULL!	#NULL!	2	#NULL!	#NULL!
839	5	2	1	30.3	0	#NULL!	30.3	1	3.03	1	2	65	1	#NULL!	0	0	2	1	4	2	0	1	4	2	1	1	1	#NULL!	#NULL!	2	66	5	3	1	2	5	1	#NULL!	#NULL!	#NULL!	#NULL!	#NULL!	#NULL!		0	0
840	5	2	1	81.113	#NULL!	#NULL!	81.113	2	8.1113	2	1	73	2	#NULL!	0	0	2	1	3	2	1	2	3	2	1	1	1	#NULL!	#NULL!	1	60	4	2	1	1	12	0	3	#NULL!	#NULL!	3	#NULL!	#NULL!		0	1
841	5	2	1	#NULL!	#NULL!	#NULL!	#NULL!	#NULL!	#NULL!	#NULL!	2	72	2	#NULL!	0	0	2	1	2	1	0	1	2	1	1	1	1	#NULL!	#NULL!	2	60	4	2	1	1	11	0	2	#NULL!	#NULL!	3	#NULL!	#NULL!		0	#NULL!
842	3	2	1	49.8066	0	#NULL!	49.8066	2	4.98066	2	1	56	1	0	1	0	2	1	3	2	0	1	3	2	1	1	#NULL!	#NULL!	#NULL!	2	60	4	2	1	1	4	1	#NULL!	#NULL!	1	#NULL!	#NULL!	#NULL!		0	1
843	5	2	1	57.2837	#NULL!	#NULL!	57.2837	2	5.72837	2	1	59	1	#NULL!	0	0	2	1	4	2	1	2	4	2	1	1	1	#NULL!	#NULL!	2	60	4	2	1	1	12	1	#NULL!	#NULL!	#NULL!	#NULL!	#NULL!	#NULL!		0	1
844	3	2	1	#NULL!	#NULL!	#NULL!	#NULL!	#NULL!	#NULL!	#NULL!	1	52	1	1	1	0	2	1	2	1	0	1	2	1	1	1	#NULL!	2	1	2	50	1	1	0	#NULL!	105	1	2	0	1	3	#NULL!	#NULL!	2	#NULL!	#NULL!
845	4	2	1	47.4	#NULL!	#NULL!	47.4	2	4.74	2	1	60	1	0	1	1	2	1	2	1	2	2	3	2	1	1	1	4	1	2	60	4	2	1	1	35.65	1	1	0	3	3	1	#NULL!		#NULL!	1
846	2	2	1	16.1733	#NULL!	#NULL!	16.1733	1	2	1	1	57	1	0	0	0	2	1	4	2	1	2	3	2	1	1	1	#NULL!	#NULL!	1	60	4	2	1	1	38	1	0	0	0	3	#NULL!	#NULL!	2	0	0
847	5	2	1	83	11.47	#NULL!	94.47	2	9.447	2	1	54	1	#NULL!	0	0	2	1	3	2	2	2	4	2	1	1	1	#NULL!	#NULL!	2	64	5	3	1	2	48	1	#NULL!	#NULL!	#NULL!	#NULL!	#NULL!	#NULL!		#NULL!	1
848	3	2	1	30.7378	#NULL!	#NULL!	30.7378	1	3.07378	1	1	53	1	1	1	0	2	1	4	2	3	2	4	2	1	1	#NULL!	#NULL!	#NULL!	#NULL!	54	2	1	0	#NULL!	19	1	0	0	2	3	#NULL!	#NULL!		#NULL!	0
849	3	2	1	#NULL!	#NULL!	#NULL!	#NULL!	#NULL!	#NULL!	#NULL!	1	59	1	0	1	0	2	1	2	1	1	2	2	1	1	1	#NULL!	#NULL!	#NULL!	2	50	1	1	0	#NULL!	33	1	#NULL!	#NULL!	#NULL!	#NULL!	#NULL!	2		#NULL!	#NULL!
850	4	2	1	127.3	#NULL!	#NULL!	127.3	2	12.73	2	2	65	1	1	1	0	2	1	4	2	2	2	4	2	1	1	1	1	1	1	59	4	2	1	1	12.88	0	0	0	0	3	#NULL!	#NULL!		0	1
851	3	2	1	22.2	#NULL!	#NULL!	22.2	1	2.22	1	1	67	2	1	1	0	2	1	3	2	2	2	3	2	1	1	#NULL!	#NULL!	#NULL!	#NULL!	58	3	1	0	#NULL!	19	1	0	0	1	3	#NULL!	#NULL!		#NULL!	0
852	3	2	1	#NULL!	#NULL!	#NULL!	#NULL!	#NULL!	#NULL!	#NULL!	1	66	2	1	0	0	2	1	1	1	2	2	2	1	1	1	#NULL!	#NULL!	#NULL!	#NULL!	58	3	1	0	#NULL!	14	1	1	0	2	3	#NULL!	#NULL!		#NULL!	#NULL!
853	3	2	1	#NULL!	0	#NULL!	#NULL!	#NULL!	#NULL!	#NULL!	1	63	1	1	1	0	2	1	4	2	0	1	4	2	1	1	#NULL!	#NULL!	#NULL!	#NULL!	59	4	2	1	1	14	1	0	0	1	3	3	4	2	#NULL!	#NULL!
854	3	2	1	#NULL!	#NULL!	#NULL!	13.8764	1	4	#NULL!	1	69	2	1	0	0	2	1	2	1	1	2	2	1	1	1	#NULL!	#NULL!	#NULL!	#NULL!	50	1	1	0	#NULL!	66	0	#NULL!	#NULL!	#NULL!	#NULL!	#NULL!	#NULL!		#NULL!	#NULL!
855	3	2	#NULL!	54.171	0	#NULL!	54.171	2	5.4171	2	1	83	1	1	0	0	2	1	4	2	0	1	4	2	0	0	#NULL!	#NULL!	#NULL!	#NULL!	60	4	2	1	1	19	1	1	0	#NULL!	3	1	#NULL!		#NULL!	1
856	1	2	1	25.415	#NULL!	#NULL!	25.415	1	8	2	1	67	2	0	0	0	2	1	4	2	1	2	4	2	1	1	#NULL!	1	1	2	63	4	3	1	2	5	1	2	3	0	3	#NULL!	1	2	#NULL!	1
857	1	2	1	17.9385	#NULL!	#NULL!	17.9385	1	3.5	1	1	62	1	0	0	0	2	1	4	2	1	2	4	2	1	1	#NULL!	2	1	2	63	4	3	1	2	18	1	2	0	0	3	#NULL!	#NULL!	2	0	0
858	4	2	1	71.8211	#NULL!	#NULL!	71.8211	2	7.18211	2	1	75	2	1	1	0	2	1	2	1	2	2	3	2	0	0	#NULL!	#NULL!	#NULL!	#NULL!	60	4	2	1	1	44	1	2	0	0	3	#NULL!	1		#NULL!	1
859	4	2	1	#NULL!	#NULL!	#NULL!	#NULL!	#NULL!	#NULL!	#NULL!	2	47	1	0	0	0	2	1	3	2	1	2	3	2	1	1	1	6	2	2	60	4	2	1	1	5	1	2	0	2	3	#NULL!	#NULL!		#NULL!	#NULL!
860	3	2	1	30.8247	#NULL!	#NULL!	30.8247	1	3.08247	1	1	75	2	1	0	0	2	1	4	2	1	2	4	2	1	1	#NULL!	#NULL!	#NULL!	1	60	4	2	1	1	23	0	0	0	#NULL!	3	3	1		#NULL!	0
861	1	2	1	10.3077	#NULL!	#NULL!	10.3077	1	4.5	2	1	66	2	0	0	0	2	1	4	2	1	2	4	2	1	1	#NULL!	4	1	2	50	1	1	0	#NULL!	48	0	0	0	1	3	#NULL!	#NULL!	1	0	1
862	4	2	1	#NULL!	#NULL!	#NULL!	#NULL!	#NULL!	#NULL!	#NULL!	1	59	1	1	1	1	2	1	3	2	2	2	4	2	1	1	1	5	2	2	60	4	2	1	1	50	1	2	0	0	3	#NULL!	#NULL!		#NULL!	#NULL!
863	3	2	1	32.1674	11	#NULL!	43.1674	2	4.31674	2	2	71	2	0	0	0	2	1	4	2	2	2	4	2	1	1	#NULL!	#NULL!	#NULL!	1	63	4	3	1	2	0.03	1	0	0	3	3	#NULL!	#NULL!		0	1
864	4	2	1	#NULL!	#NULL!	#NULL!	#NULL!	#NULL!	#NULL!	#NULL!	1	59	1	0	1	1	2	1	3	2	2	2	3	2	0	0	#NULL!	#NULL!	#NULL!	#NULL!	60	4	2	1	1	6	1	1	0	0	3	1	#NULL!		0	#NULL!
865	4	1	1	19.3484	#NULL!	#NULL!	19.3484	1	1	1	1	58	1	0	1	1	2	1	4	2	2	2	4	2	1	1	1	1	1	1	54	2	1	0	#NULL!	1.61	0	0	0	1	3	#NULL!	#NULL!	1	#NULL!	0
866	1	2	1	14.5	0	#NULL!	14.5	1	5	2	1	78	2	0	0	0	2	1	3	2	0	1	2	1	0	0	#NULL!	0	#NULL!	#NULL!	64	5	3	1	2	38.28	0	0	0	3	3	2	#NULL!	1	#NULL!	1
867	5	2	1	60.6	#NULL!	#NULL!	60.6	2	6.06	2	1	63	1	#NULL!	0	0	2	1	3	2	1	2	3	2	1	1	1	#NULL!	#NULL!	2	60	4	2	1	1	22	0	#NULL!	#NULL!	#NULL!	#NULL!	#NULL!	#NULL!		#NULL!	1
868	1	2	#NULL!	16.2792	0	#NULL!	16.2792	1	4.6	2	2	81	2	0	0	0	2	1	4	2	0	1	4	2	0	0	#NULL!	0	#NULL!	#NULL!	62	4	2	1	1	58	1	1	0	0	3	#NULL!	2	2	0	1
869	5	2	1	20.2464	0	#NULL!	20.2464	1	2.02464	1	1	61	1	#NULL!	0	0	2	1	4	2	0	1	4	2	1	1	1	#NULL!	#NULL!	2	64	5	3	1	2	37.55	0	#NULL!	#NULL!	#NULL!	#NULL!	#NULL!	#NULL!		#NULL!	0
870	5	2	1	33.4919	#NULL!	#NULL!	33.4919	1	3.34919	1	1	51	1	#NULL!	0	0	2	1	4	2	2	2	4	2	1	1	1	#NULL!	#NULL!	2	66	5	3	1	2	21	1	#NULL!	#NULL!	#NULL!	#NULL!	#NULL!	#NULL!		0	0
871	1	2	1	6.1	0	#NULL!	6.1	1	6	2	2	78	2	0	0	0	2	1	2	1	0	1	2	1	0	0	#NULL!	0	#NULL!	#NULL!	62	4	2	1	1	43	0	0	0	0	3	#NULL!	#NULL!	1	0	1
872	1	2	#NULL!	73.8647	4.53	#NULL!	78.3947	2	7	2	1	84	2	0	0	0	2	1	4	2	2	2	4	2	0	0	#NULL!	0	#NULL!	#NULL!	63	4	3	1	2	16	0	1	0	1	3	4	#NULL!	1	0	1
873	4	2	1	24.8224	1.13591	#NULL!	25.9583	1	2.59583	1	2	63	1	1	0	0	2	1	4	2	1	2	4	2	1	1	1	1	1	2	54	2	1	0	#NULL!	5	1	0	0	1	3	#NULL!	#NULL!	1	0	0
874	5	2	1	18.5062	0	#NULL!	18.5062	1	1	1	1	56	1	0	0	0	2	1	4	2	0	1	4	2	1	1	1	#NULL!	#NULL!	2	60	4	2	1	1	84	0	#NULL!	#NULL!	#NULL!	#NULL!	#NULL!	#NULL!		#NULL!	0
875	3	1	1	#NULL!	#NULL!	#NULL!	#NULL!	#NULL!	#NULL!	#NULL!	2	63	1	0	0	0	2	1	2	1	1	2	3	2	0	0	#NULL!	#NULL!	#NULL!	#NULL!	60	4	2	1	1	11	0	#NULL!	#NULL!	#NULL!	#NULL!	#NULL!	#NULL!		0	#NULL!
876	1	2	1	71.3896	7.8	#NULL!	79.1896	2	8	2	1	57	1	0	0	0	2	1	4	2	1	2	4	2	0	0	#NULL!	0	#NULL!	#NULL!	62	4	2	1	1	46	0	0	0	1	3	1	#NULL!	1	#NULL!	1
877	4	2	1	#NULL!	#NULL!	#NULL!	#NULL!	#NULL!	#NULL!	#NULL!	1	60	1	0	1	1	2	1	3	2	2	2	3	2	1	1	1	3	1	2	60	4	2	1	1	4	1	2	0	1	3	1	#NULL!	1	#NULL!	#NULL!
878	2	2	1	16.4673	#NULL!	#NULL!	16.4673	1	3	1	1	61	1	0	0	0	2	1	4	2	3	2	3	2	1	1	1	2	1	2	65	5	3	1	2	12	1	0	0	2	3	#NULL!	#NULL!	1	0	0
879	4	2	1	#NULL!	#NULL!	#NULL!	#NULL!	#NULL!	#NULL!	#NULL!	1	69	2	1	1	1	2	1	3	2	1	2	3	2	0	0	#NULL!	#NULL!	#NULL!	#NULL!	60	4	2	1	1	31.15	1	1	0	1	3	3	2	2	#NULL!	#NULL!
880	2	2	1	13.2195	#NULL!	#NULL!	13.2195	1	7	2	1	48	1	0	0	0	2	1	3	2	2	2	3	2	1	1	1	6	2	2	60	4	2	1	1	36.67	1	1	0	1	3	#NULL!	#NULL!	1	0	1
881	3	2	1	22.6531	9.81	#NULL!	32.4631	1	3.24631	1	2	61	1	0	1	0	2	1	3	2	2	2	3	2	1	1	#NULL!	4	1	2	60	4	2	1	1	12	1	#NULL!	#NULL!	#NULL!	#NULL!	3	1	1	#NULL!	0
882	4	2	1	#NULL!	#NULL!	#NULL!	#NULL!	#NULL!	#NULL!	#NULL!	1	59	1	0	1	1	2	1	3	2	2	2	3	2	1	1	1	#NULL!	#NULL!	2	60	4	2	1	1	13	1	3	0	2	3	3	1	1	0	#NULL!
883	3	2	1	#NULL!	#NULL!	#NULL!	#NULL!	#NULL!	#NULL!	#NULL!	2	54	1	1	0	0	2	1	4	2	1	2	4	2	1	1	#NULL!	#NULL!	#NULL!	#NULL!	50	1	1	0	#NULL!	16	1	1	0	#NULL!	3	#NULL!	#NULL!		#NULL!	#NULL!
884	5	2	#NULL!	65.524	#NULL!	#NULL!	65.524	2	6.5524	2	2	86	2	#NULL!	0	0	2	1	4	2	1	2	4	2	1	1	1	#NULL!	#NULL!	1	60	4	2	1	1	19	1	#NULL!	#NULL!	#NULL!	#NULL!	#NULL!	#NULL!		#NULL!	1
885	4	2	1	37.5128	#NULL!	#NULL!	37.5128	2	3.75128	1	2	32	1	1	0	0	2	1	4	2	2	2	4	2	1	1	1	1	1	2	50	1	1	0	#NULL!	20.37	0	3	0	1	3	1	#NULL!	2	0	0
886	5	2	1	18.7724	#NULL!	#NULL!	18.7724	1	1	1	1	67	2	#NULL!	0	0	2	1	4	2	1	2	4	2	1	1	1	#NULL!	#NULL!	2	66	5	3	1	2	19	1	#NULL!	#NULL!	#NULL!	#NULL!	#NULL!	#NULL!		#NULL!	0
887	4	2	1	#NULL!	#NULL!	#NULL!	#NULL!	#NULL!	#NULL!	#NULL!	1	57	1	1	1	1	2	1	3	2	3	2	4	2	1	1	1	1	1	1	50	1	1	0	#NULL!	26	0	1	0	2	3	4	#NULL!		#NULL!	#NULL!
888	3	2	1	#NULL!	#NULL!	#NULL!	#NULL!	#NULL!	#NULL!	#NULL!	2	64	1	#NULL!	0	0	2	1	1	1	2	2	3	2	1	1	#NULL!	4	1	2	60	4	2	1	1	39	1	1	0	#NULL!	3	#NULL!	#NULL!		0	#NULL!
889	2	2	1	19.1	#NULL!	#NULL!	19.1	1	13	2	1	57	1	1	0	0	2	1	3	2	2	2	3	2	1	1	2	1	1	2	66	5	3	1	2	15	1	0	0	0	3	#NULL!	#NULL!	1	0	1
890	4	2	1	#NULL!	#NULL!	#NULL!	#NULL!	#NULL!	#NULL!	#NULL!	1	52	1	0	1	1	2	1	3	2	1	2	3	2	1	1	1	5	2	2	60	4	2	1	1	3.78	0	0	0	0	3	#NULL!	#NULL!	1	0	#NULL!
891	3	2	1	#NULL!	#NULL!	#NULL!	#NULL!	#NULL!	#NULL!	#NULL!	2	53	1	0	1	0	2	1	2	1	2	1	3	2	1	1	#NULL!	#NULL!	#NULL!	#NULL!	59	4	2	1	1	36.63	0	0	0	2	3	#NULL!	#NULL!		0	#NULL!
892	1	2	1	37.595	6.82526	#NULL!	44.4203	2	5	2	1	55	1	0	0	0	2	1	4	2	3	2	4	2	1	1	#NULL!	4	1	2	63	4	3	1	2	3	1	1	0	1	3	1	#NULL!	1	#NULL!	1
893	1	2	1	28	41.57	#NULL!	69.57	2	5	2	1	58	1	0	0	0	2	1	4	2	1	2	4	2	1	1	#NULL!	4	1	2	57	3	1	0	#NULL!	22	1	0	0	3	3	3	#NULL!	1	#NULL!	1
894	1	2	1	15.5748	1.25	#NULL!	16.8248	1	4	1	2	78	2	0	0	0	2	1	3	2	1	2	3	2	0	0	#NULL!	0	#NULL!	#NULL!	62	4	2	1	1	24	0	0	0	1	3	#NULL!	#NULL!	1	#NULL!	0
895	1	2	#NULL!	41.9	0	#NULL!	41.9	2	6	2	2	68	2	0	0	0	2	1	2	1	0	1	2	1	1	1	#NULL!	1	1	2	60	4	2	1	1	27.07	0	1	1	1	3	#NULL!	#NULL!	1	#NULL!	1
896	5	2	#NULL!	38.2912	0	#NULL!	38.2912	2	3.82912	1	2	78	2	#NULL!	0	0	2	1	4	2	0	1	4	2	1	1	1	#NULL!	#NULL!	1	60	4	2	1	1	9.49	1	#NULL!	#NULL!	#NULL!	#NULL!	#NULL!	#NULL!		#NULL!	0
897	3	2	#NULL!	31.4	#NULL!	#NULL!	31.4	1	3.14	1	2	64	1	0	0	0	2	1	4	2	3	2	4	2	1	1	#NULL!	1	1	2	60	4	2	1	1	11	1	0	0	4	3	1	#NULL!	1	0	0
898	5	2	#NULL!	34.8062	0	#NULL!	34.8062	1	3.48062	1	1	80	2	1	0	0	2	1	3	2	0	1	3	2	1	1	1	#NULL!	#NULL!	1	52	2	1	0	#NULL!	21.29	1	#NULL!	#NULL!	#NULL!	#NULL!	#NULL!	#NULL!		0	0
899	4	2	#NULL!	46.6099	#NULL!	#NULL!	46.6099	2	4.66099	2	1	55	1	1	1	1	2	1	4	2	2	2	4	2	0	0	#NULL!	#NULL!	#NULL!	#NULL!	66	5	3	1	2	15	1	1	0	1	1	1	#NULL!		#NULL!	1
900	4	2	#NULL!	#NULL!	#NULL!	#NULL!	#NULL!	#NULL!	#NULL!	#NULL!	1	58	1	0	0	0	2	1	3	2	2	2	3	2	1	1	1	6	2	2	60	4	2	1	1	32	0	2	0	0	3	1	#NULL!	1	0	#NULL!
901	2	2	#NULL!	10.8928	0	#NULL!	10.8928	1	2	1	1	59	1	1	0	0	2	1	3	2	0	1	1	1	1	1	1	2	1	2	59	4	2	1	1	35.48	1	1	1	3	3	#NULL!	#NULL!	1	0	0
902	5	2	#NULL!	#NULL!	#NULL!	#NULL!	#NULL!	#NULL!	#NULL!	#NULL!	2	65	1	1	0	0	2	1	2	1	0	1	2	1	1	1	1	#NULL!	#NULL!	2	60	4	2	1	1	52	1	#NULL!	#NULL!	#NULL!	#NULL!	#NULL!	#NULL!		0	#NULL!
903	4	2	#NULL!	38.9032	#NULL!	#NULL!	38.9032	2	3.89032	1	1	67	2	1	1	1	2	1	4	2	2	2	4	2	1	1	1	2	1	2	50	1	1	0	#NULL!	3.12	1	2	0	0	3	#NULL!	#NULL!		0	0
904	3	2	#NULL!	18.2	23.13	#NULL!	41.33	2	4.133	1	2	56	1	0	1	0	2	1	3	2	2	2	2	1	1	1	#NULL!	#NULL!	#NULL!	1	58	3	1	0	#NULL!	33.97	0	0	0	#NULL!	3	1	#NULL!	2	0	0
905	4	2	#NULL!	32.8191	#NULL!	#NULL!	32.8191	1	3.28191	1	1	52	1	1	1	1	2	1	4	2	2	2	4	2	1	1	1	#NULL!	#NULL!	2	49	1	1	0	#NULL!	45	1	0	0	1	3	#NULL!	#NULL!	1	#NULL!	0
906	1	2	#NULL!	35.6622	#NULL!	#NULL!	35.6622	2	6.7	2	2	51	1	0	0	0	2	1	4	2	1	2	4	2	1	1	#NULL!	4	1	2	62	4	2	1	1	60	0	0	1	2	3	1	#NULL!	2	0	1
907	4	2	#NULL!	63.7016	5.97526	#NULL!	69.6769	2	6.96769	2	1	73	2	0	1	1	2	1	4	2	1	2	4	2	1	1	1	1	1	1	54	2	1	0	#NULL!	40	0	0	0	1	3	#NULL!	#NULL!	1	0	1
908	4	2	#NULL!	#NULL!	#NULL!	#NULL!	#NULL!	#NULL!	#NULL!	#NULL!	1	51	1	1	1	1	2	1	3	2	2	2	4	2	1	1	1	1	1	2	60	4	2	1	1	2	1	0	0	0	0	2	1	2	#NULL!	#NULL!
909	3	2	1	#NULL!	#NULL!	#NULL!	#NULL!	#NULL!	#NULL!	#NULL!	2	80	2	0	1	0	2	1	2	1	0	1	3	2	0	0	#NULL!	#NULL!	#NULL!	#NULL!	50	1	1	0	#NULL!	14	1	0	0	#NULL!	0	#NULL!	#NULL!		#NULL!	#NULL!
910	2	2	#NULL!	#NULL!	#NULL!	#NULL!	#NULL!	#NULL!	2	1	1	63	1	1	1	0	2	1	2	1	2	2	3	2	1	1	1	4	1	2	66	5	3	1	2	19.94	1	1	0	0	0	#NULL!	#NULL!	1	#NULL!	0
911	3	2	#NULL!	19.6809	0	#NULL!	19.6809	1	2	1	2	54	1	1	1	0	2	1	3	2	0	1	3	2	1	1	#NULL!	#NULL!	#NULL!	#NULL!	60	4	2	1	1	32	0	2	0	#NULL!	0	1	#NULL!	2	#NULL!	0
912	1	2	#NULL!	46.6884	0	#NULL!	46.6884	2	6	2	1	70	2	0	0	0	2	1	3	2	0	1	2	1	0	0	#NULL!	0	#NULL!	#NULL!	60	4	2	1	1	33.68	0	1	0	2	0	#NULL!	#NULL!	2	0	1
913	2	2	#NULL!	26.7223	8.17	#NULL!	34.8923	1	4	1	1	56	1	1	0	0	2	1	3	2	2	2	3	2	1	1	1	6	2	2	60	4	2	1	1	23	1	0	0	0	0	#NULL!	#NULL!	1	0	0
914	4	2	#NULL!	#NULL!	#NULL!	#NULL!	#NULL!	#NULL!	#NULL!	#NULL!	1	64	1	1	0	1	2	1	3	2	2	2	3	2	0	0	#NULL!	#NULL!	#NULL!	#NULL!	50	1	1	0	#NULL!	15	1	0	0	0	0	#NULL!	#NULL!		#NULL!	#NULL!
915	5	2	1	#NULL!	#NULL!	#NULL!	#NULL!	#NULL!	#NULL!	#NULL!	2	79	2	1	0	0	2	1	1	1	0	1	3	2	1	1	1	#NULL!	#NULL!	1	60	4	2	1	1	57	0	#NULL!	#NULL!	#NULL!	#NULL!	#NULL!	#NULL!		0	#NULL!
916	4	2	#NULL!	64.187	#NULL!	#NULL!	64.187	2	6.4187	2	2	71	2	1	0	0	2	1	4	2	1	2	4	2	1	1	1	1	1	1	60	4	2	1	1	18.79	1	1	0	2	0	1	#NULL!	1	#NULL!	1
917	3	2	1	15.5365	#NULL!	#NULL!	15.5365	1	2	1	2	77	1	1	0	0	2	1	4	2	2	2	4	2	1	1	#NULL!	#NULL!	#NULL!	#NULL!	64	5	3	1	2	7	0	#NULL!	#NULL!	1	#NULL!	3	1		0	0
918	5	2	#NULL!	#NULL!	#NULL!	#NULL!	#NULL!	#NULL!	#NULL!	#NULL!	1	68	2	#NULL!	0	0	2	1	2	1	0	1	2	1	1	1	1	#NULL!	#NULL!	1	60	4	2	1	1	13	1	3	#NULL!	#NULL!	0	#NULL!	#NULL!		0	#NULL!
919	2	2	#NULL!	44.9295	5.54	#NULL!	50.4695	2	6	2	1	57	1	1	0	0	2	1	4	2	2	2	3	2	1	1	1	8	2	2	68	5	3	1	2	33.18	0	0	0	1	0	#NULL!	#NULL!	1	#NULL!	1
920	3	2	#NULL!	30.5151	17.65	#NULL!	48.1651	2	4.81651	2	2	66	2	0	0	0	2	1	3	2	2	2	3	2	1	1	#NULL!	4	1	2	60	4	2	1	1	3	1	3	0	#NULL!	0	#NULL!	#NULL!	1	#NULL!	1
921	3	2	#NULL!	43.9123	5.52219	#NULL!	49.4345	2	4.94345	2	2	51	1	0	1	0	2	1	4	2	2	2	4	2	1	1	#NULL!	#NULL!	#NULL!	#NULL!	54	2	1	0	#NULL!	55	0	0	1	1	0	#NULL!	#NULL!		0	1
922	4	2	#NULL!	27.8265	#NULL!	#NULL!	27.8265	1	2.78265	1	1	74	2	1	0	0	2	1	4	2	1	2	4	2	0	0	#NULL!	#NULL!	#NULL!	#NULL!	60	4	2	1	1	32.92	1	2	0	2	0	#NULL!	#NULL!	2	0	0
923	4	2	#NULL!	20.4927	#NULL!	#NULL!	20.4927	1	2.04927	1	1	70	2	1	1	1	2	1	4	2	2	2	4	2	1	1	1	2	1	2	50	1	1	0	#NULL!	12	1	1	0	1	0	2	#NULL!		0	0
924	4	2	2	#NULL!	#NULL!	#NULL!	#NULL!	#NULL!	#NULL!	#NULL!	1	50	1	1	1	1	2	1	3	2	3	2	4	2	1	1	1	2	1	2	52	2	1	0	#NULL!	7.52	1	1	0	2	0	#NULL!	#NULL!		#NULL!	#NULL!
925	5	2	2	6.2419	#NULL!	#NULL!	6.2419	1	2	1	1	52	1	#NULL!	0	0	2	1	4	2	1	2	4	2	1	1	1	#NULL!	#NULL!	2	60	4	2	1	1	32	0	#NULL!	#NULL!	#NULL!	#NULL!	#NULL!	#NULL!		#NULL!	0
926	4	2	2	#NULL!	#NULL!	#NULL!	#NULL!	#NULL!	#NULL!	#NULL!	1	64	1	0	1	1	2	1	3	2	2	2	3	2	0	0	#NULL!	#NULL!	#NULL!	#NULL!	60	4	2	1	1	6	1	0	0	0	0	#NULL!	#NULL!		0	#NULL!
927	3	2	2	44.7781	#NULL!	#NULL!	44.7781	2	4.47781	2	2	60	1	1	0	0	2	1	4	2	1	2	4	2	1	1	#NULL!	#NULL!	#NULL!	#NULL!	59	4	2	1	1	32.53	0	0	0	1	0	3	1	1	#NULL!	1
928	3	1	2	25.8624	0	#NULL!	25.8624	1	2.58624	1	2	58	1	1	1	0	2	1	4	2	0	1	4	2	1	1	#NULL!	4	1	2	50	1	1	0	#NULL!	107	1	2	0	1	0	#NULL!	#NULL!		0	0
929	1	2	2	33.2645	#NULL!	#NULL!	33.2645	1	5	2	1	66	2	0	0	0	2	1	4	2	1	2	4	2	0	0	#NULL!	0	#NULL!	#NULL!	62	4	2	1	1	19	1	0	0	1	0	#NULL!	#NULL!	2	0	1
930	5	2	2	23.7168	#NULL!	#NULL!	23.7168	1	2.37168	1	1	72	2	#NULL!	0	0	2	1	3	2	1	2	3	2	1	1	1	#NULL!	#NULL!	2	60	4	2	1	1	13	1	3	#NULL!	#NULL!	0	#NULL!	#NULL!		0	0
931	3	2	2	9.555	2.6	#NULL!	12.155	1	2	1	2	61	2	0	1	0	2	1	3	2	2	2	3	2	1	1	#NULL!	#NULL!	#NULL!	#NULL!	60	4	2	1	1	55	0	0	0	#NULL!	0	#NULL!	#NULL!		0	0
932	3	2	2	5.5733	0	#NULL!	5.5733	1	2	1	2	63	2	0	0	0	2	1	3	2	0	1	3	2	1	1	#NULL!	#NULL!	#NULL!	#NULL!	64	5	3	1	2	51	0	1	0	#NULL!	0	2	#NULL!		#NULL!	0
933	5	2	2	10.3	#NULL!	#NULL!	10.3	1	2	1	1	56	1	0	0	0	2	1	3	2	1	2	3	2	1	1	1	#NULL!	#NULL!	2	60	4	2	1	1	114	0	4	#NULL!	#NULL!	0	#NULL!	#NULL!		#NULL!	0
934	3	2	2	14.5572	2.63567	#NULL!	17.1929	1	2	1	2	63	1	0	1	0	2	1	4	2	1	2	4	2	1	1	#NULL!	2	1	1	66	5	3	1	2	32	1	0	0	4	0	#NULL!	1		0	0
935	3	2	2	#NULL!	#NULL!	#NULL!	5.4	1	3	#NULL!	2	53	1	1	1	0	2	1	2	1	2	2	1	1	1	1	#NULL!	#NULL!	#NULL!	2	60	4	2	1	1	13	1	1	0	4	1	#NULL!	#NULL!	1	0	#NULL!
936	3	2	2	17.0625	14.64	#NULL!	31.7025	1	3.17025	1	2	62	1	0	0	0	2	1	4	2	2	2	4	2	0	0	#NULL!	#NULL!	#NULL!	#NULL!	60	4	2	1	1	4.47	1	3	0	#NULL!	0	#NULL!	#NULL!		0	0
937	3	2	2	14.3099	6.17	#NULL!	20.4799	1	2.04799	1	2	70	2	0	1	0	2	1	3	2	1	2	3	2	0	0	#NULL!	#NULL!	#NULL!	#NULL!	60	4	2	1	1	23	0	#NULL!	#NULL!	#NULL!	#NULL!	#NULL!	#NULL!		0	0
938	1	2	2	33.4657	#NULL!	#NULL!	33.4657	1	6	2	1	66	2	0	0	0	2	1	4	2	2	2	4	2	1	1	#NULL!	1	1	2	63	4	3	1	2	41	0	2	1	2	0	#NULL!	#NULL!	2	0	1
939	4	2	2	27.2415	0	#NULL!	27.2415	1	2.72415	1	1	52	1	0	0	1	2	1	4	2	0	1	4	2	1	1	1	3	1	2	60	4	2	1	1	50	1	2	0	0	0	1	#NULL!	1	#NULL!	0
940	3	2	2	30.2	0	#NULL!	30.2	1	3.02	1	2	68	2	0	1	0	2	1	4	2	0	1	4	2	1	1	#NULL!	1	1	1	60	4	2	1	1	17.41	0	0	0	2	0	#NULL!	#NULL!	2	#NULL!	0
941	4	2	2	#NULL!	#NULL!	#NULL!	#NULL!	#NULL!	#NULL!	#NULL!	1	61	1	1	1	1	2	1	3	2	1	2	3	2	0	0	#NULL!	#NULL!	#NULL!	#NULL!	60	4	2	1	1	31.54	0	3	0	2	0	#NULL!	#NULL!		#NULL!	#NULL!
942	4	2	2	17.847	0	#NULL!	17.847	1	2	1	1	69	1	1	1	1	2	1	2	1	0	1	2	1	0	0	#NULL!	#NULL!	#NULL!	#NULL!	60	4	2	1	1	10	0	0	0	0	0	#NULL!	#NULL!		0	0
943	1	2	2	85.6003	#NULL!	#NULL!	85.6003	2	10	2	1	47	1	0	0	0	2	1	4	2	1	2	4	2	1	1	#NULL!	1	1	2	59	4	2	1	1	16.72	0	1	1	1	0	#NULL!	#NULL!	1	#NULL!	1
944	1	2	2	50.3	11.196	#NULL!	61.496	2	8	2	1	59	1	0	0	0	2	1	4	2	3	2	4	2	1	1	#NULL!	1	1	2	60	4	2	1	1	30.32	1	1	0	0	0	#NULL!	#NULL!	1	0	1
945	4	2	2	#NULL!	#NULL!	#NULL!	#NULL!	#NULL!	#NULL!	#NULL!	1	59	1	0	1	1	2	1	3	2	2	2	4	2	1	1	1	4	1	2	60	4	2	1	1	25	1	1	0	2	0	3	1	1	#NULL!	#NULL!
946	5	2	2	#NULL!	#NULL!	#NULL!	#NULL!	#NULL!	#NULL!	#NULL!	1	73	2	#NULL!	0	0	2	1	2	1	0	1	2	1	1	1	1	#NULL!	#NULL!	2	60	4	2	1	1	30.32	0	#NULL!	#NULL!	#NULL!	#NULL!	#NULL!	#NULL!		#NULL!	#NULL!
947	4	2	2	196.766	#NULL!	#NULL!	196.766	2	19.6766	2	1	66	2	1	1	1	2	1	4	2	2	2	4	2	1	1	1	5	2	2	60	4	2	1	1	12	1	2	0	2	1	1	#NULL!		#NULL!	1
948	4	2	2	#NULL!	#NULL!	#NULL!	#NULL!	#NULL!	#NULL!	#NULL!	1	48	1	0	1	1	2	1	3	2	2	2	4	2	1	1	1	5	2	2	62	4	2	1	1	16.56	0	2	0	0	0	#NULL!	#NULL!		0	#NULL!
949	3	2	2	51.6022	8.39515	#NULL!	59.9974	2	5.99974	2	2	67	2	0	0	0	2	1	4	2	2	2	4	2	1	1	#NULL!	2	1	2	60	4	2	1	1	16.33	1	0	2	1	0	4	#NULL!	1	#NULL!	1
950	3	2	2	17.4737	0.678447	#NULL!	18.1521	1	4	1	2	51	1	0	1	0	2	1	4	2	1	2	4	2	1	1	#NULL!	#NULL!	#NULL!	2	60	4	2	1	1	42	1	#NULL!	#NULL!	1	#NULL!	#NULL!	#NULL!	1	0	0
951	4	2	2	#NULL!	#NULL!	#NULL!	#NULL!	#NULL!	#NULL!	#NULL!	1	41	1	0	0	1	2	1	3	2	3	2	4	2	1	1	1	6	2	2	66	5	3	1	2	10	1	3	0	0	1	#NULL!	#NULL!		#NULL!	#NULL!
952	3	2	2	24.6506	#NULL!	#NULL!	24.6506	1	2.46506	1	2	71	2	0	0	0	2	1	3	2	3	2	3	2	1	1	#NULL!	#NULL!	#NULL!	1	60	4	2	1	1	63	0	0	0	2	0	#NULL!	#NULL!	1	0	0
953	3	2	2	238.986	4.52	#NULL!	243.506	2	24.3505	2	2	66	2	1	0	0	2	1	3	2	2	2	2	1	1	1	#NULL!	4	1	2	60	4	2	1	1	43	1	0	0	#NULL!	0	#NULL!	#NULL!	1	0	1
954	5	2	2	22.632	0	#NULL!	22.632	1	2.2632	1	2	63	1	#NULL!	0	0	2	1	4	2	0	1	4	2	1	1	1	#NULL!	#NULL!	2	64	5	3	1	2	8	0	#NULL!	#NULL!	#NULL!	#NULL!	#NULL!	#NULL!		#NULL!	0
955	4	2	2	#NULL!	#NULL!	#NULL!	#NULL!	#NULL!	#NULL!	#NULL!	1	67	2	0	1	1	2	1	3	2	1	2	3	2	1	1	1	5	2	2	60	4	2	1	1	22	1	1	0	2	0	#NULL!	#NULL!	1	0	#NULL!
956	3	2	2	26.8028	0	#NULL!	26.8028	1	2.68028	1	2	56	1	0	1	0	2	1	4	2	0	1	4	2	1	1	#NULL!	4	1	2	60	4	2	1	1	11	1	0	0	#NULL!	0	#NULL!	#NULL!	2	0	0
957	4	1	2	#NULL!	#NULL!	#NULL!	#NULL!	#NULL!	#NULL!	#NULL!	2	55	1	1	0	0	2	1	3	2	3	2	4	2	0	0	#NULL!	#NULL!	#NULL!	#NULL!	64	5	3	1	2	10	1	3	0	1	0	#NULL!	#NULL!		0	#NULL!
958	4	2	2	#NULL!	#NULL!	#NULL!	#NULL!	#NULL!	#NULL!	#NULL!	2	58	1	0	0	0	2	1	3	2	2	2	3	2	0	0	#NULL!	#NULL!	#NULL!	#NULL!	64	5	3	1	2	23.03	1	2	0	2	0	4	#NULL!		#NULL!	#NULL!
959	5	2	2	130.583	0	#NULL!	130.583	2	13.0583	2	2	66	2	0	0	0	2	1	4	2	0	1	2	1	1	1	1	#NULL!	#NULL!	1	50	1	1	0	#NULL!	31	0	1	#NULL!	#NULL!	0	#NULL!	#NULL!		0	1
960	4	2	2	#NULL!	#NULL!	#NULL!	#NULL!	#NULL!	#NULL!	#NULL!	1	61	1	1	1	1	2	1	3	2	1	2	3	2	1	1	1	5	2	2	68	5	3	1	2	31.15	0	2	0	3	0	#NULL!	#NULL!	1	#NULL!	#NULL!
961	5	2	2	47.0163	#NULL!	#NULL!	47.0163	2	4.70163	2	1	65	1	0	0	0	2	1	4	2	2	2	4	2	1	1	1	#NULL!	#NULL!	2	66	5	3	1	2	28	0	#NULL!	#NULL!	#NULL!	#NULL!	#NULL!	#NULL!		0	1
962	4	2	2	#NULL!	#NULL!	#NULL!	#NULL!	#NULL!	#NULL!	#NULL!	1	62	1	1	1	1	2	1	3	2	2	2	4	2	1	1	1	1	1	1	49	1	1	0	#NULL!	28.62	1	0	0	0	0	1	1	1	#NULL!	#NULL!
963	4	2	2	#NULL!	#NULL!	#NULL!	#NULL!	#NULL!	#NULL!	#NULL!	2	65	1	0	0	0	2	1	3	2	1	2	3	2	1	1	1	1	1	2	51	2	1	0	#NULL!	14.49	1	0	0	3	1	#NULL!	#NULL!		#NULL!	#NULL!
964	4	2	2	#NULL!	#NULL!	#NULL!	#NULL!	#NULL!	#NULL!	#NULL!	1	65	1	0	1	1	2	1	3	2	1	2	4	2	1	1	1	4	1	2	60	4	2	1	1	5	1	2	0	3	0	3	1	1	0	#NULL!
965	3	2	2	44.6558	7.67002	#NULL!	52.3258	2	5.23258	2	2	65	1	0	1	0	2	1	3	2	2	2	4	2	1	1	#NULL!	4	1	2	60	4	2	1	1	19	1	1	0	1	0	1	#NULL!	2	#NULL!	1
966	3	2	2	#NULL!	#NULL!	#NULL!	60.3603	2	#NULL!	#NULL!	2	35	1	#NULL!	0	0	2	1	2	1	1	2	2	1	1	1	#NULL!	#NULL!	#NULL!	#NULL!	60	4	2	1	1	20	1	#NULL!	#NULL!	#NULL!	#NULL!	#NULL!	#NULL!	2	#NULL!	#NULL!
967	1	2	2	64.4	0	#NULL!	64.4	2	7	2	1	59	1	0	0	0	2	1	4	2	0	1	4	2	1	1	#NULL!	4	1	2	60	4	2	1	1	84	0	0	0	2	0	#NULL!	#NULL!	1	0	1
968	4	2	2	#NULL!	#NULL!	#NULL!	#NULL!	#NULL!	#NULL!	#NULL!	1	68	2	0	1	1	2	1	3	2	1	2	3	2	1	1	1	#NULL!	#NULL!	2	60	4	2	1	1	10	1	0	0	1	1	1	#NULL!		#NULL!	#NULL!
969	1	1	2	13.041	0	#NULL!	13.041	1	4	1	2	58	1	0	0	0	2	1	4	2	0	1	4	2	1	1	#NULL!	2	1	2	60	4	2	1	1	13.34	1	0	0	3	0	1	#NULL!	1	#NULL!	0
970	4	2	2	48.1836	#NULL!	#NULL!	48.1836	2	4.81836	2	1	58	1	1	1	1	2	1	4	2	2	2	4	2	1	1	1	1	1	1	60	4	2	1	1	15.67	0	2	0	1	0	2	#NULL!	1	#NULL!	1
971	3	2	#NULL!	41.8242	0	#NULL!	41.8242	2	4.18242	1	2	84	2	#NULL!	1	0	2	1	4	2	0	1	4	2	0	0	#NULL!	#NULL!	#NULL!	#NULL!	60	4	2	1	1	37	1	0	0	#NULL!	0	#NULL!	#NULL!	2	#NULL!	0
972	3	1	2	49.2305	0	#NULL!	49.2305	2	4.92305	2	2	67	2	1	1	0	2	1	4	2	0	1	4	2	0	0	#NULL!	#NULL!	#NULL!	#NULL!	60	4	2	1	1	10	1	0	1	#NULL!	0	3	2	1	#NULL!	1
973	4	2	2	16.5725	#NULL!	#NULL!	16.5725	1	2	1	1	76	2	1	1	1	2	1	4	2	2	2	4	2	0	0	#NULL!	#NULL!	#NULL!	#NULL!	60	4	2	1	1	26.35	0	2	0	0	0	1	#NULL!		#NULL!	0
974	5	2	2	53.2419	0	#NULL!	53.2419	2	5.32419	2	1	75	2	1	0	0	2	1	4	2	0	1	4	2	1	1	1	#NULL!	#NULL!	1	50	1	1	0	#NULL!	89	0	#NULL!	#NULL!	#NULL!	#NULL!	#NULL!	#NULL!		0	1
975	1	2	2	40.8438	6.15292	#NULL!	46.9967	2	5.6	2	2	51	1	0	0	0	2	1	4	2	1	2	3	2	1	1	#NULL!	3	1	2	65	5	3	1	2	53	1	1	0	3	0	1	#NULL!	1	#NULL!	1
976	3	2	2	79.8106	#NULL!	#NULL!	79.8106	2	7.98106	2	2	47	1	1	0	0	2	1	3	2	2	2	3	2	0	0	#NULL!	#NULL!	#NULL!	#NULL!	54	2	1	0	#NULL!	13	1	3	1	1	0	1	#NULL!	2	#NULL!	1
977	3	2	2	48.4085	#NULL!	#NULL!	48.4085	2	4.84085	2	2	59	1	0	1	0	2	1	3	2	1	2	2	1	1	1	#NULL!	#NULL!	#NULL!	#NULL!	64	5	3	1	2	33	0	0	0	#NULL!	1	#NULL!	#NULL!	1	#NULL!	1
978	4	2	2	#NULL!	#NULL!	#NULL!	#NULL!	#NULL!	#NULL!	#NULL!	1	70	2	1	1	1	2	1	3	2	2	2	3	2	0	0	#NULL!	#NULL!	#NULL!	#NULL!	60	4	2	1	1	2	0	0	0	0	1	2	#NULL!	2	0	#NULL!
979	3	2	2	16.1868	1.81	#NULL!	17.9968	1	2	1	2	55	1	#NULL!	1	0	2	1	3	2	1	2	3	2	1	1	#NULL!	#NULL!	#NULL!	#NULL!	60	4	2	1	1	41	1	1	0	#NULL!	0	#NULL!	#NULL!	2	#NULL!	0
980	3	2	#NULL!	11.1	0	#NULL!	11.1	1	2	1	2	81	2	1	0	0	2	1	3	2	0	1	3	2	0	0	#NULL!	#NULL!	#NULL!	#NULL!	60	4	2	1	1	31	1	0	0	1	0	1	#NULL!	1	#NULL!	0
981	3	2	2	66.8265	0	#NULL!	66.8265	2	6.68265	2	2	72	2	0	0	0	2	1	4	2	0	1	3	2	1	1	#NULL!	#NULL!	#NULL!	2	60	4	2	1	1	62	0	0	0	#NULL!	1	1	#NULL!		0	1
982	5	2	2	40.8375	0	#NULL!	40.8375	2	4.08375	1	2	67	2	1	0	0	2	1	3	2	0	1	3	2	1	1	1	#NULL!	#NULL!	2	50	1	1	0	#NULL!	42	0	#NULL!	#NULL!	#NULL!	#NULL!	#NULL!	#NULL!		#NULL!	0
983	3	2	#NULL!	#NULL!	#NULL!	#NULL!	#NULL!	#NULL!	#NULL!	#NULL!	2	80	2	1	1	0	2	1	2	1	2	2	3	2	0	0	#NULL!	#NULL!	#NULL!	#NULL!	60	4	2	1	1	6	1	0	0	2	0	#NULL!	#NULL!	1	#NULL!	#NULL!
984	4	2	2	31.5124	#NULL!	#NULL!	31.5124	1	3.15124	1	1	65	1	1	1	0	2	1	4	2	2	2	4	2	1	1	1	5	2	2	60	4	2	1	1	35	0	2	0	3	0	#NULL!	3	1	#NULL!	0
985	2	2	2	111.1	#NULL!	#NULL!	111.1	2	3.5	1	2	61	1	1	0	0	2	1	3	2	1	2	3	2	1	1	1	6	2	2	59	4	2	1	1	38	1	0	0	3	0	#NULL!	#NULL!	1	#NULL!	0
986	4	2	2	64.4522	1.59	#NULL!	66.0422	2	6.60422	2	1	65	1	1	0	0	2	1	4	2	1	2	4	2	0	0	#NULL!	#NULL!	#NULL!	#NULL!	60	4	2	1	1	30.19	0	1	0	0	0	2	#NULL!		#NULL!	1
987	5	2	2	24.1988	#NULL!	#NULL!	24.1988	1	2.41988	1	1	72	2	1	0	0	2	1	4	2	1	2	4	2	1	1	1	#NULL!	#NULL!	1	59	4	2	1	1	34	1	3	#NULL!	#NULL!	1	#NULL!	#NULL!		#NULL!	0
988	1	2	1	8.5286	#NULL!	#NULL!	8.5286	1	3	1	2	79	2	0	0	0	2	1	4	2	1	2	4	2	0	0	#NULL!	0	#NULL!	#NULL!	63	4	3	1	2	25.92	0	1	0	#NULL!	0	#NULL!	#NULL!	1	#NULL!	0
989	5	2	2	54.5706	#NULL!	#NULL!	54.5706	2	5.45706	2	2	62	1	0	0	0	2	1	4	2	3	2	4	2	1	1	1	#NULL!	#NULL!	2	66	5	3	1	2	24	1	#NULL!	#NULL!	#NULL!	#NULL!	#NULL!	#NULL!		0	1
990	1	2	2	45.8	4.5517	#NULL!	50.3517	2	8	2	1	61	1	0	0	0	2	1	4	2	2	2	4	2	1	1	#NULL!	3	1	2	64	5	3	1	2	15	1	1	0	1	1	3	1	1	0	1
991	3	2	#NULL!	#NULL!	#NULL!	#NULL!	#NULL!	#NULL!	#NULL!	#NULL!	2	84	2	1	0	0	2	1	1	1	1	2	3	2	1	1	#NULL!	#NULL!	#NULL!	1	60	4	2	1	1	12.65	0	2	0	#NULL!	0	3	3		#NULL!	#NULL!
992	3	2	2	23.1372	#NULL!	#NULL!	23.1372	1	2.31372	1	2	64	1	0	1	0	2	1	3	2	1	2	3	2	1	1	#NULL!	#NULL!	#NULL!	#NULL!	66	5	3	1	2	9.26	1	#NULL!	#NULL!	#NULL!	#NULL!	#NULL!	#NULL!	1	0	0
993	4	2	2	#NULL!	#NULL!	#NULL!	15	1	3	#NULL!	1	65	1	1	1	1	2	1	3	2	2	2	3	2	1	1	1	1	1	1	50	1	1	0	#NULL!	5	1	1	0	1	0	2	#NULL!	1	#NULL!	#NULL!
994	4	2	2	#NULL!	#NULL!	#NULL!	#NULL!	#NULL!	#NULL!	#NULL!	1	69	2	1	1	0	2	1	3	2	2	2	4	2	1	1	1	1	1	1	60	4	2	1	1	22	0	1	0	0	0	#NULL!	1	1	0	#NULL!
995	2	2	2	6.4401	#NULL!	#NULL!	6.4401	1	4	1	1	59	1	0	0	0	2	1	3	2	1	2	3	2	1	1	1	5	2	2	59	4	2	1	1	22.54	1	0	0	1	0	#NULL!	#NULL!	2	0	0
996	1	2	2	27.9386	#NULL!	#NULL!	27.9386	1	4	1	1	54	1	0	0	0	2	1	4	2	1	2	4	2	1	1	#NULL!	3	1	2	58	3	1	0	#NULL!	68	0	0	0	1	0	#NULL!	#NULL!	2	#NULL!	0
997	3	2	2	#NULL!	#NULL!	#NULL!	#NULL!	#NULL!	#NULL!	#NULL!	2	61	1	0	1	0	2	1	2	1	2	2	3	2	1	1	#NULL!	#NULL!	#NULL!	2	66	5	3	1	2	42	1	0	0	#NULL!	0	3	#NULL!	2	#NULL!	#NULL!
998	4	2	2	#NULL!	#NULL!	#NULL!	#NULL!	#NULL!	#NULL!	#NULL!	1	59	1	1	1	1	2	1	3	2	1	2	3	2	1	1	1	4	1	2	60	4	2	1	1	22	1	2	0	0	2	#NULL!	#NULL!	2	0	#NULL!
999	4	2	2	#NULL!	#NULL!	#NULL!	#NULL!	#NULL!	#NULL!	#NULL!	2	74	2	0	1	0	2	1	3	2	1	2	3	2	0	0	#NULL!	#NULL!	#NULL!	#NULL!	56	3	1	0	#NULL!	21.26	0	2	0	0	1	1	#NULL!	1	#NULL!	#NULL!
1000	5	2	#NULL!	#NULL!	#NULL!	#NULL!	#NULL!	#NULL!	#NULL!	#NULL!	2	82	2	#NULL!	0	0	2	1	1	1	0	1	3	2	1	1	1	#NULL!	#NULL!	1	60	4	2	1	1	5.62	0	#NULL!	#NULL!	#NULL!	#NULL!	#NULL!	#NULL!		#NULL!	#NULL!
1001	1	2	2	45.6478	4.78897	#NULL!	50.4368	2	8	2	1	63	1	0	0	0	2	1	3	2	2	2	3	2	1	1	#NULL!	1	1	2	63	4	3	1	2	18.73	0	0	0	0	0	#NULL!	#NULL!	1	#NULL!	1
1002	3	2	2	#NULL!	#NULL!	#NULL!	#NULL!	#NULL!	#NULL!	#NULL!	2	66	2	1	1	0	2	1	1	1	2	2	3	2	1	1	#NULL!	#NULL!	#NULL!	2	59	4	2	1	1	33	1	0	0	#NULL!	0	#NULL!	#NULL!	1	0	#NULL!
1003	3	2	#NULL!	18.0121	2.61	#NULL!	20.6221	1	2.06221	1	2	80	2	1	1	0	2	1	4	2	2	2	4	2	1	1	#NULL!	#NULL!	#NULL!	#NULL!	50	1	1	0	#NULL!	14	1	0	0	#NULL!	2	3	2		#NULL!	0
1004	4	2	#NULL!	13.441	0	#NULL!	13.441	1	2	1	2	82	2	1	0	0	2	1	2	1	0	2	2	1	1	1	#NULL!	#NULL!	#NULL!	1	60	4	2	1	1	18.69	1	1	0	0	0	1	#NULL!		#NULL!	0
1005	4	2	2	#NULL!	#NULL!	#NULL!	#NULL!	#NULL!	#NULL!	#NULL!	1	70	2	1	1	1	2	1	3	2	3	2	4	2	0	0	#NULL!	#NULL!	#NULL!	#NULL!	60	4	2	1	1	12.25	0	2	0	1	0	#NULL!	#NULL!	2	0	#NULL!
1006	3	2	2	55.172	#NULL!	#NULL!	55.172	2	5.5172	2	2	44	1	0	1	0	2	1	4	2	2	2	4	2	0	0	#NULL!	#NULL!	#NULL!	#NULL!	50	1	1	0	#NULL!	53	0	0	0	#NULL!	0	3	1	2	#NULL!	1
1007	3	2	2	#NULL!	#NULL!	#NULL!	53.4107	2	4.2	1	2	64	1	#NULL!	1	0	2	1	2	1	1	2	2	1	0	0	#NULL!	#NULL!	#NULL!	#NULL!	60	4	2	1	1	16.89	1	1	0	#NULL!	0	#NULL!	#NULL!	2	0	0
1008	4	2	2	#NULL!	#NULL!	#NULL!	#NULL!	#NULL!	#NULL!	#NULL!	1	75	2	0	1	1	2	1	3	2	1	2	3	2	1	1	1	1	1	1	60	4	2	1	1	78	0	2	0	1	0	2	#NULL!		#NULL!	#NULL!
1009	5	2	2	38.5	#NULL!	#NULL!	38.5	2	3.85	1	2	62	1	#NULL!	0	0	2	1	3	2	1	2	3	2	1	1	1	#NULL!	#NULL!	1	60	4	2	1	1	50	0	#NULL!	#NULL!	#NULL!	#NULL!	#NULL!	#NULL!		0	0
1010	1	2	2	25.0824	#NULL!	#NULL!	25.0824	1	4	1	1	49	1	0	0	0	2	1	4	2	2	2	4	2	1	1	#NULL!	4	1	2	60	4	2	1	1	15	1	1	1	2	0	1	#NULL!	2	#NULL!	0
1011	4	2	2	20.8458	7.93753	#NULL!	28.7833	1	2.87833	1	1	66	2	0	1	1	2	1	4	2	1	2	4	2	1	1	1	5	2	2	60	4	2	1	1	47	0	1	0	0	0	#NULL!	#NULL!	1	0	0
1012	4	2	2	28.1	0	#NULL!	28.1	1	2.81	1	2	71	2	0	0	0	2	1	2	1	0	1	2	1	1	1	1	1	1	1	50	1	1	0	#NULL!	81	0	0	0	0	0	#NULL!	#NULL!		#NULL!	0
1013	4	2	2	#NULL!	#NULL!	#NULL!	#NULL!	#NULL!	#NULL!	#NULL!	1	74	2	1	1	1	2	1	3	2	1	2	3	2	1	1	#NULL!	#NULL!	#NULL!	#NULL!	66	5	3	1	2	18	1	2	0	0	0	#NULL!	#NULL!		0	#NULL!
1014	3	2	2	23.5252	8.59	#NULL!	32.1152	1	3.21152	1	2	51	1	0	1	0	2	1	4	2	2	2	4	2	1	1	#NULL!	4	1	2	60	4	2	1	1	36	1	0	0	#NULL!	0	4	#NULL!	1	0	0
1015	1	2	2	30.9174	1.73839	#NULL!	32.6558	1	5	2	1	52	1	0	0	0	2	1	4	2	1	2	3	2	1	1	#NULL!	1	1	2	60	4	2	1	1	107	0	1	0	2	0	3	2	1	#NULL!	1
1016	4	2	#NULL!	22.8068	#NULL!	#NULL!	22.8068	1	2.28068	1	2	83	2	0	1	0	2	1	4	2	2	2	4	2	0	0	#NULL!	#NULL!	#NULL!	#NULL!	60	4	2	1	1	8.57	1	2	0	0	0	#NULL!	#NULL!		0	0
1017	4	2	2	11.1866	#NULL!	#NULL!	11.1866	1	3	1	1	68	2	0	1	1	2	1	4	2	2	2	4	2	1	1	1	3	1	2	60	4	2	1	1	4	1	2	0	3	0	#NULL!	#NULL!	1	#NULL!	0
1018	3	2	2	#NULL!	#NULL!	#NULL!	#NULL!	#NULL!	#NULL!	#NULL!	2	57	1	1	0	0	2	1	1	1	0	1	2	1	1	1	#NULL!	#NULL!	#NULL!	1	60	4	2	1	1	35	0	1	0	#NULL!	0	2	#NULL!	1	0	#NULL!
1019	5	2	2	#NULL!	#NULL!	#NULL!	#NULL!	#NULL!	#NULL!	#NULL!	1	63	1	#NULL!	0	0	2	1	2	1	0	1	2	1	1	1	1	#NULL!	#NULL!	2	60	4	2	1	1	44	0	#NULL!	#NULL!	#NULL!	#NULL!	#NULL!	#NULL!		#NULL!	#NULL!
1020	3	2	2	23.4101	#NULL!	#NULL!	23.4101	1	2.34101	1	2	56	1	#NULL!	0	0	2	1	3	2	1	2	3	2	1	1	#NULL!	#NULL!	#NULL!	2	60	4	2	1	1	7	1	0	0	#NULL!	0	1	#NULL!	1	#NULL!	0
1021	3	2	2	#NULL!	#NULL!	#NULL!	8	1	5	2	2	67	2	0	1	0	2	1	2	1	2	2	3	2	1	1	#NULL!	#NULL!	#NULL!	#NULL!	60	4	2	1	1	51	1	1	0	2	0	#NULL!	#NULL!	1	0	1
1022	4	2	2	#NULL!	#NULL!	#NULL!	#NULL!	#NULL!	#NULL!	#NULL!	1	60	1	1	0	1	2	1	3	2	3	2	4	2	1	1	1	6	2	2	60	4	2	1	1	45	0	1	0	2	0	2	#NULL!		#NULL!	#NULL!
1023	3	2	2	#NULL!	#NULL!	#NULL!	#NULL!	#NULL!	#NULL!	#NULL!	2	53	1	1	1	0	2	1	2	2	2	2	3	2	1	1	#NULL!	#NULL!	#NULL!	#NULL!	60	4	2	1	1	80	1	0	0	#NULL!	0	#NULL!	#NULL!		#NULL!	#NULL!
1024	3	1	#NULL!	28.5021	1.5	#NULL!	59	2	3.00021	1	2	82	2	0	1	0	2	1	4	2	1	2	4	2	0	0	#NULL!	#NULL!	#NULL!	#NULL!	54	2	1	0	#NULL!	1.15	1	0	0	2	0	1	#NULL!		#NULL!	0
1025	4	2	2	#NULL!	#NULL!	#NULL!	#NULL!	#NULL!	#NULL!	#NULL!	2	48	1	0	0	0	2	1	3	2	1	2	3	2	1	1	1	6	2	2	66	5	3	1	2	26	1	1	0	3	4	#NULL!	#NULL!		#NULL!	#NULL!
1026	4	2	2	#NULL!	#NULL!	#NULL!	#NULL!	#NULL!	#NULL!	#NULL!	1	74	2	1	0	1	2	1	3	2	3	2	4	2	0	0	#NULL!	#NULL!	#NULL!	#NULL!	60	4	2	1	1	15	1	1	0	0	4	#NULL!	#NULL!	2	#NULL!	#NULL!
1027	5	2	2	39.2617	#NULL!	#NULL!	39.2617	2	3.92617	1	1	69	2	#NULL!	0	0	2	1	4	2	1	2	4	2	1	1	1	#NULL!	#NULL!	2	64	5	3	1	2	25	0	#NULL!	#NULL!	#NULL!	#NULL!	#NULL!	#NULL!		0	0
1028	4	2	2	74.2525	#NULL!	#NULL!	74.2525	2	7.42525	2	1	57	1	1	1	1	2	1	4	2	2	2	4	2	1	1	1	1	1	1	60	4	2	1	1	11	0	2	0	0	4	#NULL!	#NULL!	1	0	1
1029	4	2	2	#NULL!	#NULL!	#NULL!	#NULL!	#NULL!	#NULL!	#NULL!	1	74	2	1	0	0	2	1	3	2	3	2	4	2	1	1	1	1	1	1	62	4	2	1	1	48	0	1	0	1	4	4	#NULL!		0	#NULL!
1030	5	2	2	80.8169	#NULL!	#NULL!	80.8169	2	8.08169	2	1	65	1	#NULL!	0	0	2	1	3	2	1	2	3	2	1	1	1	#NULL!	#NULL!	2	60	4	2	1	1	9	0	3	#NULL!	#NULL!	4	#NULL!	#NULL!		0	1
1031	3	2	2	#NULL!	#NULL!	#NULL!	#NULL!	#NULL!	#NULL!	#NULL!	2	71	2	1	1	0	2	1	2	1	3	2	3	2	1	1	#NULL!	#NULL!	#NULL!	1	59	4	2	1	1	7	1	1	0	2	0	#NULL!	#NULL!	1	0	#NULL!
1032	4	2	2	#NULL!	#NULL!	#NULL!	#NULL!	#NULL!	#NULL!	#NULL!	1	56	1	1	1	1	2	1	3	2	3	2	4	2	1	1	1	4	1	2	60	4	2	1	1	61	0	1	0	1	0	1	1	1	#NULL!	#NULL!
1033	3	2	2	#NULL!	#NULL!	#NULL!	#NULL!	#NULL!	#NULL!	#NULL!	2	64	1	0	0	1	2	1	2	1	0	1	3	2	1	1	#NULL!	#NULL!	#NULL!	#NULL!	60	4	2	1	1	65	1	2	0	1	0	1	#NULL!	1	0	#NULL!
1034	4	2	2	#NULL!	#NULL!	#NULL!	#NULL!	#NULL!	#NULL!	#NULL!	2	76	2	0	0	1	2	1	3	2	1	2	3	2	0	0	#NULL!	#NULL!	#NULL!	#NULL!	60	4	2	1	1	44	0	0	0	0	0	#NULL!	#NULL!		#NULL!	#NULL!
1035	4	2	2	12.4168	#NULL!	#NULL!	12.4168	1	2	1	2	51	1	1	0	1	2	1	4	2	3	2	4	2	0	0	#NULL!	#NULL!	#NULL!	#NULL!	60	4	2	1	1	23	1	0	0	0	0	3	1	2	#NULL!	0
1036	4	2	2	#NULL!	#NULL!	#NULL!	#NULL!	#NULL!	#NULL!	#NULL!	2	64	1	1	0	1	2	1	3	2	2	2	3	2	1	1	1	2	1	2	60	4	2	1	1	60	0	0	0	2	0	#NULL!	#NULL!	1	0	#NULL!
1037	3	2	2	8.4	#NULL!	#NULL!	8.4	1	2	1	2	73	2	0	1	1	2	1	3	2	2	2	2	1	1	1	#NULL!	#NULL!	#NULL!	#NULL!	62	4	2	1	1	8.48	1	0	0	#NULL!	0	#NULL!	#NULL!		#NULL!	0
1038	3	2	2	#NULL!	#NULL!	#NULL!	#NULL!	#NULL!	#NULL!	#NULL!	2	41	1	0	1	1	2	1	2	1	1	2	3	2	1	1	#NULL!	#NULL!	#NULL!	2	60	4	2	1	1	3.15	1	1	0	#NULL!	0	#NULL!	#NULL!	2	#NULL!	#NULL!
1039	3	2	2	43	12.0255	#NULL!	55.0255	2	5.50255	2	2	63	1	1	1	1	2	1	3	2	2	2	3	2	1	1	#NULL!	4	1	#NULL!	60	4	2	1	1	19	0	0	#NULL!	2	0	#NULL!	#NULL!	2	#NULL!	1
1040	3	2	2	34	0	#NULL!	34	1	3.4	1	2	50	1	0	0	1	2	1	3	2	0	1	4	2	1	1	#NULL!	#NULL!	#NULL!	2	60	4	2	1	1	14	1	#NULL!	#NULL!	1	#NULL!	3	1	2	0	0
1041	4	2	2	#NULL!	#NULL!	#NULL!	#NULL!	#NULL!	#NULL!	#NULL!	2	60	1	1	0	1	2	1	3	2	1	2	3	2	1	1	1	1	1	2	60	4	2	1	1	34	0	2	0	0	0	1	1	2	#NULL!	#NULL!
1042	3	2	2	17.5892	#NULL!	#NULL!	17.5892	1	2	1	2	50	1	0	1	1	2	1	4	2	2	2	4	2	1	1	#NULL!	#NULL!	#NULL!	2	60	4	2	1	1	19	1	0	0	#NULL!	0	#NULL!	#NULL!	1	0	0
1043	5	2	2	15.0537	#NULL!	#NULL!	15.0537	1	2	1	1	65	1	#NULL!	0	1	2	1	3	2	1	2	3	2	1	1	1	#NULL!	#NULL!	2	64	5	3	1	2	6.7	1	#NULL!	#NULL!	#NULL!	#NULL!	#NULL!	#NULL!		#NULL!	0
1044	3	2	2	48.2159	#NULL!	#NULL!	48.2159	2	4.82159	2	2	73	2	#NULL!	0	1	2	1	4	2	1	2	4	2	0	0	#NULL!	#NULL!	#NULL!	#NULL!	60	4	2	1	1	16.62	1	0	0	#NULL!	0	3	1	1	#NULL!	1
1045	4	2	2	#NULL!	#NULL!	#NULL!	#NULL!	#NULL!	#NULL!	#NULL!	1	55	1	0	1	1	2	1	3	2	2	2	3	2	1	1	1	#NULL!	#NULL!	1	50	1	1	0	#NULL!	4	1	0	0	0	0	2	#NULL!	1	#NULL!	#NULL!
1046	1	2	2	58.7056	#NULL!	#NULL!	58.7056	2	6.8	2	1	46	1	0	0	1	2	1	4	2	1	2	4	2	1	1	#NULL!	5	2	2	60	4	2	1	1	50	1	1	1	2	0	#NULL!	#NULL!	2	#NULL!	1
1047	3	2	2	67	#NULL!	#NULL!	67	2	6.7	2	2	48	1	0	0	1	2	1	4	2	3	2	4	2	1	1	#NULL!	#NULL!	#NULL!	#NULL!	66	5	3	1	2	60	0	0	0	2	0	3	2	1	#NULL!	1
1048	1	2	2	35.9936	0	#NULL!	35.9936	2	4	1	1	54	1	0	0	1	2	1	3	2	0	1	2	1	1	1	#NULL!	4	1	2	65	5	3	1	2	12	1	1	0	1	0	#NULL!	#NULL!	2	#NULL!	0
1049	4	2	2	24.0719	#NULL!	#NULL!	24.0719	1	2.40719	1	1	72	2	1	0	1	2	1	4	2	2	2	4	2	1	1	#NULL!	#NULL!	#NULL!	1	60	4	2	1	1	22	1	1	0	1	0	#NULL!	#NULL!		#NULL!	0
1050	1	2	2	#NULL!	#NULL!	#NULL!	0	1	5	2	1	62	1	0	0	0	2	1	2	1	2	2	3	2	1	1	#NULL!	3	1	2	62	4	2	1	1	53	0	0	0	2	0	#NULL!	#NULL!	2	0	1
1051	1	2	#NULL!	81.113	4.63	#NULL!	85.743	2	10	2	2	90	2	1	0	0	2	1	3	2	2	2	3	2	0	0	#NULL!	0	#NULL!	#NULL!	59	4	2	1	1	2	1	1	0	1	0	#NULL!	5	1	#NULL!	1
1052	3	2	2	42.699	#NULL!	#NULL!	42.699	2	4.2699	1	2	49	1	0	1	0	2	1	4	2	1	2	4	2	1	1	#NULL!	4	1	2	50	1	1	0	#NULL!	110	0	0	0	#NULL!	0	#NULL!	#NULL!	2	#NULL!	0
1053	1	2	2	73.9816	0	#NULL!	73.9816	2	4	1	2	71	2	0	0	0	2	1	4	2	0	1	4	2	1	1	#NULL!	4	1	2	60	4	2	1	1	2.89	1	1	0	2	0	#NULL!	5	1	#NULL!	0
1054	1	2	2	25.7008	0	#NULL!	25.7008	1	4.5	2	2	46	1	0	0	0	2	1	4	2	0	1	2	1	1	1	#NULL!	4	1	2	66	5	3	1	2	10	1	0	0	3	0	3	1	1	#NULL!	1
1055	1	2	2	83	35.154	#NULL!	118.154	2	11	2	1	55	1	0	0	0	2	1	3	2	2	2	3	2	1	1	#NULL!	2	1	2	64	5	3	1	2	6	0	0	0	3	0	3	3	1	#NULL!	1
1056	1	2	#NULL!	60.6	3.64	#NULL!	64.24	2	5	2	2	81	2	0	0	0	2	1	3	2	2	2	3	2	0	0	#NULL!	0	#NULL!	#NULL!	63	4	3	1	2	42	1	1	0	0	0	3	2	1	0	1
1057	3	2	2	33.7386	11.0732	#NULL!	44.8118	2	4.48118	2	2	60	1	1	0	0	2	1	3	2	2	2	4	2	1	1	#NULL!	#NULL!	#NULL!	2	61	4	2	1	1	45	0	#NULL!	#NULL!	#NULL!	#NULL!	#NULL!	#NULL!	2	0	1
1058	1	2	2	23.7168	4.16	#NULL!	27.8768	1	4	1	1	40	1	0	0	0	2	1	3	2	1	2	3	2	1	1	#NULL!	2	1	2	63	4	3	1	2	96	1	0	0	4	0	1	#NULL!	1	0	0
1059	5	2	2	#NULL!	#NULL!	#NULL!	#NULL!	#NULL!	#NULL!	#NULL!	2	67	2	0	0	0	2	1	3	2	1	2	2	1	1	1	1	#NULL!	#NULL!	2	50	1	1	0	#NULL!	8	1	2	#NULL!	#NULL!	0	#NULL!	#NULL!		#NULL!	#NULL!
1060	3	2	2	26.9807	12.012	#NULL!	38.9927	2	3.89927	1	2	67	2	0	0	0	2	1	4	2	2	2	4	2	0	0	#NULL!	#NULL!	#NULL!	#NULL!	50	1	1	0	#NULL!	4.99	0	4	3	1	0	1	#NULL!	2	#NULL!	0
1061	4	2	#NULL!	11.2732	#NULL!	#NULL!	11.2732	1	2	1	1	70	2	0	1	1	2	1	4	2	3	2	4	2	1	1	1	1	1	1	50	1	1	0	#NULL!	75	0	1	0	0	0	#NULL!	#NULL!		#NULL!	0
1062	5	2	#NULL!	35.1699	#NULL!	#NULL!	35.1699	2	3.51699	1	1	71	2	1	0	0	2	1	4	2	2	2	4	2	1	1	1	#NULL!	#NULL!	2	66	5	3	1	2	25	0	#NULL!	#NULL!	#NULL!	#NULL!	#NULL!	#NULL!		#NULL!	0
1063	5	2	#NULL!	77.1034	59.0354	#NULL!	136.139	2	13.6139	2	1	51	1	1	0	0	2	1	4	2	2	2	4	2	1	1	1	#NULL!	#NULL!	1	66	5	3	1	2	3	1	#NULL!	#NULL!	#NULL!	#NULL!	#NULL!	#NULL!		#NULL!	1
1064	4	2	#NULL!	#NULL!	#NULL!	#NULL!	#NULL!	#NULL!	#NULL!	#NULL!	1	64	1	1	1	0	2	1	3	2	2	2	3	2	1	1	1	3	1	2	49	1	1	0	#NULL!	6.01	0	0	0	2	0	#NULL!	#NULL!	2	#NULL!	#NULL!
1065	5	2	#NULL!	#NULL!	#NULL!	#NULL!	#NULL!	#NULL!	#NULL!	#NULL!	1	74	2	0	0	0	2	1	2	1	0	1	2	1	1	1	1	#NULL!	#NULL!	1	50	1	1	0	#NULL!	49	1	#NULL!	#NULL!	#NULL!	#NULL!	#NULL!	#NULL!		0	#NULL!
1066	4	2	#NULL!	17.7	#NULL!	#NULL!	17.7	1	2	1	1	51	1	0	1	1	2	1	2	1	2	2	4	2	1	1	#NULL!	#NULL!	#NULL!	#NULL!	60	4	2	1	1	60	0	1	0	1	0	#NULL!	#NULL!	2	#NULL!	0
1067	4	2	#NULL!	#NULL!	#NULL!	#NULL!	#NULL!	#NULL!	#NULL!	#NULL!	1	55	1	0	1	1	2	1	3	2	3	2	4	2	1	1	1	4	1	2	50	1	1	0	#NULL!	9.3	0	0	0	3	0	#NULL!	#NULL!	1	#NULL!	#NULL!
1068	5	2	#NULL!	#NULL!	#NULL!	#NULL!	#NULL!	#NULL!	#NULL!	#NULL!	2	65	1	#NULL!	0	0	2	1	3	2	1	2	3	2	1	1	1	#NULL!	#NULL!	2	60	4	2	1	1	14	1	#NULL!	#NULL!	#NULL!	#NULL!	#NULL!	#NULL!		#NULL!	#NULL!
1069	5	2	#NULL!	16.3479	6.988	#NULL!	23.3359	1	2.33359	1	1	73	2	1	0	0	2	1	4	2	2	2	4	2	1	1	1	#NULL!	#NULL!	2	66	5	3	1	2	6.18	1	#NULL!	#NULL!	#NULL!	#NULL!	#NULL!	#NULL!		#NULL!	0
1070	5	2	#NULL!	60.8856	#NULL!	#NULL!	60.8856	2	6.08856	2	1	64	1	1	0	0	2	1	4	2	2	2	4	2	1	1	1	#NULL!	#NULL!	1	66	5	3	1	2	4.57	0	#NULL!	#NULL!	#NULL!	#NULL!	#NULL!	#NULL!		0	1
1071	4	2	#NULL!	#NULL!	#NULL!	#NULL!	#NULL!	#NULL!	#NULL!	#NULL!	1	60	1	1	1	1	2	1	3	2	2	2	4	2	1	1	#NULL!	#NULL!	#NULL!	2	66	5	3	1	2	23	1	2	2	2	0	1	#NULL!	2	#NULL!	#NULL!
1072	4	2	#NULL!	66.757	0	#NULL!	66.757	2	6.6757	2	1	23	1	0	0	0	2	1	4	2	0	1	4	2	1	1	1	2	1	2	60	4	2	1	1	10.78	0	0	0	1	0	#NULL!	#NULL!	1	0	1
1073	5	2	#NULL!	#NULL!	#NULL!	#NULL!	#NULL!	#NULL!	#NULL!	#NULL!	1	68	2	1	0	0	2	1	1	1	1	2	3	2	1	1	1	#NULL!	#NULL!	2	66	5	3	1	2	6.18	0	#NULL!	#NULL!	#NULL!	#NULL!	#NULL!	#NULL!		#NULL!	#NULL!
1074	1	2	#NULL!	51.7	15.79	#NULL!	67.49	2	6	2	2	61	1	0	0	0	2	1	4	2	1	2	4	2	1	1	#NULL!	2	1	2	63	4	3	1	2	17	1	0	0	0	0	3	4	1	0	1
1075	3	2	#NULL!	24.3102	#NULL!	#NULL!	24.3102	1	2.43102	1	2	48	1	0	1	0	2	1	3	2	2	2	3	2	1	1	#NULL!	#NULL!	#NULL!	2	60	4	2	1	1	6	0	2	0	1	0	4	#NULL!	1	#NULL!	0
1076	3	2	#NULL!	23.2595	0	#NULL!	23.2595	1	2.32595	1	2	73	2	1	0	0	2	1	4	2	0	1	4	2	1	1	#NULL!	#NULL!	#NULL!	#NULL!	60	4	2	1	1	48	1	#NULL!	#NULL!	#NULL!	#NULL!	1	#NULL!	1	#NULL!	0
1077	1	2	#NULL!	39.6444	11.47	#NULL!	51.1144	2	4	1	2	76	2	0	0	0	2	1	2	1	2	2	3	2	0	0	#NULL!	0	#NULL!	#NULL!	60	4	2	1	1	5.95	1	1	0	2	0	2	#NULL!	1	0	0
1078	4	2	#NULL!	28.3624	#NULL!	#NULL!	28.3624	1	2.83624	1	1	67	2	1	1	1	2	1	4	2	2	2	4	2	1	1	1	6	2	2	60	4	2	1	1	12	1	1	0	3	0	#NULL!	#NULL!	1	#NULL!	0
1079	1	2	#NULL!	7.4	3.49389	#NULL!	10.8939	1	5	2	2	65	1	0	0	0	2	1	2	1	1	2	2	1	0	0	#NULL!	0	#NULL!	#NULL!	62	4	2	1	1	18	0	1	0	1	0	2	#NULL!	1	0	1
1080	4	2	#NULL!	#NULL!	#NULL!	#NULL!	#NULL!	#NULL!	#NULL!	#NULL!	1	59	1	1	1	1	2	1	3	2	2	2	3	2	0	0	#NULL!	#NULL!	#NULL!	#NULL!	60	4	2	1	1	11.07	1	0	0	0	0	2	#NULL!		0	#NULL!
1081	2	2	#NULL!	53.2	#NULL!	#NULL!	53.2	2	5	2	1	54	1	0	1	1	2	1	3	2	2	2	3	2	1	1	1	1	1	1	60	4	2	1	1	10.22	1	2	0	1	0	#NULL!	#NULL!	2	0	1
1082	3	2	#NULL!	13.8764	#NULL!	#NULL!	13.8764	1	2	1	2	55	1	0	0	1	2	1	3	2	1	2	3	2	1	1	#NULL!	#NULL!	#NULL!	2	60	4	2	1	1	26	1	3	0	1	0	1	#NULL!	1	#NULL!	0
1083	1	2	1	10.3	0	#NULL!	10.3	1	5.5	2	2	58	1	0	0	1	2	1	3	2	0	1	2	1	1	1	#NULL!	4	1	2	63	4	3	1	2	66	0	1	0	2	0	2	#NULL!	1	#NULL!	1
1084	1	2	1	38.2912	0	#NULL!	38.2912	2	6	2	1	72	2	0	0	1	2	1	4	2	0	1	4	2	0	0	#NULL!	0	#NULL!	#NULL!	62	4	2	1	1	4	1	1	0	1	0	#NULL!	#NULL!	2	#NULL!	1
1085	3	2	1	21.8	17.8917	#NULL!	39.6917	2	3.96917	1	2	59	1	1	1	1	2	1	3	2	2	2	3	2	1	1	#NULL!	3	1	2	60	4	2	1	1	23	1	2	0	2	0	3	1	1	#NULL!	0
1086	3	2	1	7.02405	31.34	#NULL!	38.364	2	3.83641	1	2	55	1	0	0	1	2	1	4	2	2	2	4	2	1	1	#NULL!	5	2	2	60	4	2	1	1	15	1	3	0	#NULL!	0	3	2	1	0	0
1087	5	2	1	#NULL!	#NULL!	#NULL!	#NULL!	#NULL!	#NULL!	#NULL!	2	67	2	#NULL!	0	1	2	1	2	1	1	2	2	1	1	1	1	#NULL!	#NULL!	2	60	4	2	1	1	17.68	0	#NULL!	#NULL!	#NULL!	#NULL!	#NULL!	#NULL!		#NULL!	#NULL!
1088	4	2	1	15.8966	#NULL!	#NULL!	15.8966	1	2	1	1	68	2	1	1	1	2	1	4	2	2	2	4	2	1	1	1	2	1	2	50	1	1	0	#NULL!	43	1	1	0	0	0	2	#NULL!		#NULL!	0
1089	1	2	1	40.8375	59.0354	#NULL!	99.8729	2	6	2	2	75	2	0	0	1	2	1	3	2	2	2	3	2	1	1	#NULL!	4	1	2	62	4	2	1	1	39	0	1	0	2	0	3	3	1	0	1
1090	2	2	1	48.631	4.53	#NULL!	53.161	2	7	2	2	66	2	1	0	1	2	1	3	2	2	2	3	2	1	1	1	3	1	2	64	5	3	1	2	40	1	2	1	4	0	#NULL!	#NULL!	1	#NULL!	1
1091	5	1	1	#NULL!	#NULL!	#NULL!	14	1	9	#NULL!	1	66	2	#NULL!	0	1	2	1	3	2	0	1	3	2	1	1	1	#NULL!	#NULL!	2	64	5	3	1	2	116	1	#NULL!	#NULL!	#NULL!	#NULL!	#NULL!	#NULL!		#NULL!	#NULL!
1092	3	2	1	#NULL!	#NULL!	#NULL!	#NULL!	#NULL!	#NULL!	#NULL!	2	58	1	1	0	1	2	1	1	1	2	2	1	1	1	1	#NULL!	#NULL!	#NULL!	2	54	2	1	0	#NULL!	21	1	0	0	#NULL!	0	#NULL!	#NULL!	1	#NULL!	#NULL!
1093	1	2	1	38.5	6.988	#NULL!	45.488	2	6	2	1	72	2	0	0	1	2	1	3	2	2	2	3	2	1	1	#NULL!	0	#NULL!	#NULL!	62	4	2	1	1	52	1	0	0	0	0	#NULL!	#NULL!	1	#NULL!	1
1094	1	2	1	15.0537	0	#NULL!	15.0537	1	6	2	2	78	2	0	0	1	2	1	3	2	0	1	2	1	0	0	#NULL!	0	#NULL!	#NULL!	63	4	3	1	2	9	1	1	0	1	0	#NULL!	#NULL!	1	#NULL!	1
1095	4	2	1	#NULL!	#NULL!	#NULL!	#NULL!	#NULL!	#NULL!	#NULL!	1	54	1	0	1	1	2	1	3	2	3	2	4	2	1	1	1	2	1	2	60	4	2	1	1	6	1	2	0	0	0	3	#NULL!		#NULL!	#NULL!
1096	5	2	1	#NULL!	#NULL!	#NULL!	#NULL!	#NULL!	#NULL!	#NULL!	2	62	1	0	0	1	2	1	2	1	0	1	2	1	1	1	1	#NULL!	#NULL!	2	50	1	1	0	#NULL!	48	0	#NULL!	#NULL!	#NULL!	#NULL!	#NULL!	#NULL!		0	#NULL!
1097	#NULL!	2	#NULL!	#NULL!	#NULL!	#NULL!	#NULL!	#NULL!	3.5	1	1	44	1	#NULL!	#NULL!	#NULL!	2	1	2	1	2	2	3	2	1	1	#NULL!	4	1	2	68.4	5	3	1	2	14.7	1	#NULL!	#NULL!	#NULL!	#NULL!	#NULL!	#NULL!		0	0
1098	#NULL!	1	#NULL!	#NULL!	#NULL!	#NULL!	#NULL!	#NULL!	5	2	2	47	1	#NULL!	#NULL!	#NULL!	2	1	2	1	2	2	2	#NULL!	1	1	#NULL!	#NULL!	#NULL!	2	63	4	3	1	2	12.3	1	#NULL!	#NULL!	#NULL!	#NULL!	#NULL!	#NULL!		#NULL!	1
1099	#NULL!	1	#NULL!	#NULL!	#NULL!	#NULL!	#NULL!	#NULL!	6.5	2	1	49	1	#NULL!	#NULL!	#NULL!	2	1	3	2	2	2	3	2	1	1	#NULL!	0	1	2	68	5	3	1	2	4.9	1	#NULL!	#NULL!	#NULL!	#NULL!	#NULL!	#NULL!		#NULL!	1
1100	#NULL!	2	#NULL!	#NULL!	#NULL!	#NULL!	#NULL!	#NULL!	9.5	2	1	50	1	#NULL!	#NULL!	#NULL!	2	1	4	2	1	2	3	2	1	1	#NULL!	#NULL!	#NULL!	2	64	5	3	1	2	41.0333	1	#NULL!	#NULL!	#NULL!	#NULL!	#NULL!	#NULL!		#NULL!	1
1101	#NULL!	1	#NULL!	#NULL!	#NULL!	#NULL!	#NULL!	#NULL!	11.5	2	1	54	1	#NULL!	#NULL!	#NULL!	2	1	4	2	2	2	3	2	1	1	#NULL!	#NULL!	#NULL!	2	61.2	4	2	1	1	6.2	1	#NULL!	#NULL!	#NULL!	#NULL!	#NULL!	#NULL!		#NULL!	1
1102	#NULL!	2	#NULL!	#NULL!	#NULL!	#NULL!	#NULL!	#NULL!	9.5	2	1	56	1	#NULL!	#NULL!	#NULL!	2	1	4	2	1	2	4	2	1	1	#NULL!	#NULL!	#NULL!	2	61.2	4	2	1	1	91.1	1	#NULL!	#NULL!	#NULL!	#NULL!	#NULL!	#NULL!		#NULL!	1
1103	#NULL!	2	#NULL!	#NULL!	#NULL!	#NULL!	#NULL!	#NULL!	8	2	1	56	1	#NULL!	#NULL!	#NULL!	2	1	4	2	3	2	3	2	1	1	#NULL!	#NULL!	#NULL!	2	60	4	2	1	1	5.6	1	#NULL!	#NULL!	#NULL!	#NULL!	#NULL!	#NULL!		0	1
1104	#NULL!	1	#NULL!	#NULL!	#NULL!	#NULL!	#NULL!	#NULL!	6	2	1	60	1	#NULL!	#NULL!	#NULL!	2	1	1	1	0	1	1	#NULL!	1	1	#NULL!	0	1	2	68.4	5	3	1	2	36.0667	1	#NULL!	#NULL!	#NULL!	#NULL!	#NULL!	#NULL!		0	1
1105	#NULL!	1	#NULL!	#NULL!	#NULL!	#NULL!	#NULL!	#NULL!	7	2	2	60	1	#NULL!	#NULL!	#NULL!	2	1	2	1	2	2	3	2	1	1	#NULL!	0	1	2	61.2	4	2	1	1	24.7333	1	#NULL!	#NULL!	#NULL!	#NULL!	#NULL!	#NULL!		#NULL!	1
1106	#NULL!	1	#NULL!	#NULL!	#NULL!	#NULL!	#NULL!	#NULL!	4	1	1	66	2	#NULL!	#NULL!	#NULL!	2	1	3	2	1	2	3	2	1	1	#NULL!	#NULL!	#NULL!	2	66	5	3	1	2	11.6333	1	#NULL!	#NULL!	#NULL!	#NULL!	#NULL!	#NULL!		0	0
1107	#NULL!	1	#NULL!	#NULL!	#NULL!	#NULL!	#NULL!	#NULL!	9.5	2	1	73	2	#NULL!	#NULL!	#NULL!	2	1	2	1	1	2	2	#NULL!	1	1	#NULL!	2	1	2	61.2	4	2	1	1	60	1	#NULL!	#NULL!	#NULL!	#NULL!	#NULL!	#NULL!		#NULL!	1
1108	#NULL!	2	2	#NULL!	#NULL!	#NULL!	#NULL!	#NULL!	#NULL!	#NULL!	1	46	1	1	1	1	2	1	#NULL!	#NULL!	#NULL!	#NULL!	3	2	1	1	1	#NULL!	2	2	60	4	2	1	1	7	1	#NULL!	#NULL!	#NULL!	#NULL!	#NULL!	1		#NULL!	#NULL!
1109	#NULL!	2	2	#NULL!	#NULL!	#NULL!	#NULL!	#NULL!	#NULL!	#NULL!	1	59	1	1	1	0	2	1	#NULL!	#NULL!	#NULL!	#NULL!	2	#NULL!	1	1	1	#NULL!	2	2	60	4	2	1	1	64	0	#NULL!	#NULL!	#NULL!	#NULL!	#NULL!	#NULL!		0	#NULL!
1110	#NULL!	2	#NULL!	#NULL!	#NULL!	#NULL!	#NULL!	#NULL!	#NULL!	#NULL!	1	67	2	1	#NULL!	1	2	1	#NULL!	#NULL!	#NULL!	#NULL!	4	2	1	1	2	#NULL!	1	2	60	4	2	1	1	105	0	#NULL!	#NULL!	#NULL!	#NULL!	#NULL!	#NULL!		0	#NULL!
1111	#NULL!	2	#NULL!	#NULL!	#NULL!	#NULL!	#NULL!	#NULL!	#NULL!	#NULL!	1	51	1	0	1	1	2	1	#NULL!	#NULL!	#NULL!	#NULL!	2	#NULL!	1	1	1	#NULL!	2	2	54	2	1	0	#NULL!	3	1	#NULL!	#NULL!	#NULL!	#NULL!	1	#NULL!		#NULL!	#NULL!
1112	#NULL!	2	#NULL!	#NULL!	#NULL!	#NULL!	30	1	3.9	#NULL!	1	55	1	0	1	1	2	1	#NULL!	#NULL!	#NULL!	#NULL!	3	2	1	1	1	#NULL!	2	2	54	2	1	0	#NULL!	3	1	#NULL!	#NULL!	#NULL!	#NULL!	2	#NULL!		#NULL!	#NULL!
1113	#NULL!	2	#NULL!	#NULL!	#NULL!	#NULL!	#NULL!	#NULL!	#NULL!	#NULL!	1	55	1	0	1	1	2	1	#NULL!	#NULL!	#NULL!	#NULL!	4	2	1	1	1	#NULL!	2	2	60	4	2	1	1	46	0	#NULL!	#NULL!	#NULL!	#NULL!	#NULL!	1		0	#NULL!
1114	#NULL!	2	#NULL!	#NULL!	#NULL!	#NULL!	#NULL!	#NULL!	#NULL!	#NULL!	1	55	1	0	1	1	2	1	#NULL!	#NULL!	#NULL!	#NULL!	4	2	1	1	1	#NULL!	2	2	60	4	2	1	1	43	0	#NULL!	#NULL!	#NULL!	#NULL!	#NULL!	2		0	#NULL!
1115	#NULL!	2	#NULL!	#NULL!	#NULL!	#NULL!	#NULL!	#NULL!	#NULL!	#NULL!	1	39	1	0	1	1	2	1	#NULL!	#NULL!	#NULL!	#NULL!	3	2	1	1	1	#NULL!	2	2	60	4	2	1	1	24	1	#NULL!	#NULL!	#NULL!	#NULL!	#NULL!	#NULL!		#NULL!	#NULL!
1116	#NULL!	1	#NULL!	#NULL!	#NULL!	#NULL!	#NULL!	#NULL!	#NULL!	#NULL!	1	62	1	0	0	0	2	1	#NULL!	#NULL!	#NULL!	#NULL!	4	2	1	1	1	#NULL!	2	2	60	4	2	1	1	5	0	#NULL!	#NULL!	#NULL!	#NULL!	#NULL!	#NULL!		0	#NULL!
1117	#NULL!	1	#NULL!	#NULL!	#NULL!	#NULL!	#NULL!	#NULL!	#NULL!	#NULL!	1	57	1	0	0	1	2	1	#NULL!	#NULL!	#NULL!	#NULL!	2	#NULL!	1	1	1	#NULL!	1	2	60	4	2	1	1	72	0	#NULL!	#NULL!	#NULL!	#NULL!	#NULL!	#NULL!		0	#NULL!
1118	#NULL!	1	#NULL!	#NULL!	#NULL!	#NULL!	#NULL!	#NULL!	#NULL!	#NULL!	1	71	2	0	1	1	2	1	#NULL!	#NULL!	#NULL!	#NULL!	4	2	1	1	1	#NULL!	2	2	60	4	2	1	1	91	0	#NULL!	#NULL!	#NULL!	#NULL!	1	2		0	#NULL!
1119	#NULL!	1	#NULL!	#NULL!	#NULL!	#NULL!	#NULL!	#NULL!	#NULL!	#NULL!	1	39	1	0	1	1	2	1	#NULL!	#NULL!	#NULL!	#NULL!	3	2	1	1	1	#NULL!	2	2	60	4	2	1	1	63	1	#NULL!	#NULL!	#NULL!	#NULL!	#NULL!	#NULL!		#NULL!	#NULL!
1120	#NULL!	1	#NULL!	#NULL!	#NULL!	#NULL!	#NULL!	#NULL!	#NULL!	#NULL!	1	53	1	0	#NULL!	1	2	1	#NULL!	#NULL!	#NULL!	#NULL!	#NULL!	#NULL!	1	1	1	#NULL!	1	2	54	2	1	0	#NULL!	23	1	#NULL!	#NULL!	#NULL!	#NULL!	#NULL!	#NULL!		#NULL!	#NULL!
1121	#NULL!	1	#NULL!	#NULL!	#NULL!	#NULL!	26	1	3	#NULL!	1	56	1	1	1	1	2	1	#NULL!	#NULL!	#NULL!	#NULL!	3	2	1	1	1	#NULL!	1	2	54	2	1	0	#NULL!	5	0	#NULL!	#NULL!	#NULL!	#NULL!	#NULL!	#NULL!		#NULL!	#NULL!
1122	#NULL!	2	#NULL!	#NULL!	#NULL!	#NULL!	#NULL!	#NULL!	#NULL!	#NULL!	1	84	2	1	1	#NULL!	2	1	#NULL!	#NULL!	#NULL!	#NULL!	3	2	1	1	1	#NULL!	2	2	60	4	2	1	1	55	0	#NULL!	#NULL!	#NULL!	#NULL!	4	1		0	#NULL!
1123	#NULL!	1	#NULL!	#NULL!	#NULL!	#NULL!	#NULL!	#NULL!	#NULL!	#NULL!	1	61	1	0	1	1	2	1	#NULL!	#NULL!	#NULL!	#NULL!	4	2	1	1	1	#NULL!	2	2	54	2	1	0	#NULL!	16	1	#NULL!	#NULL!	#NULL!	#NULL!	#NULL!	#NULL!		#NULL!	#NULL!
1124	#NULL!	1	#NULL!	#NULL!	#NULL!	#NULL!	#NULL!	#NULL!	#NULL!	#NULL!	1	59	1	1	1	1	2	1	#NULL!	#NULL!	#NULL!	#NULL!	3	2	1	1	1	#NULL!	2	2	54	2	1	0	#NULL!	14	1	#NULL!	#NULL!	#NULL!	#NULL!	#NULL!	#NULL!		#NULL!	#NULL!
1125	#NULL!	1	#NULL!	#NULL!	#NULL!	#NULL!	#NULL!	#NULL!	#NULL!	#NULL!	1	62	1	0	1	1	2	1	#NULL!	#NULL!	#NULL!	#NULL!	#NULL!	#NULL!	1	1	1	#NULL!	1	2	60	4	2	1	1	12	1	#NULL!	#NULL!	#NULL!	#NULL!	#NULL!	#NULL!		#NULL!	#NULL!
1126	#NULL!	1	#NULL!	#NULL!	#NULL!	#NULL!	#NULL!	#NULL!	#NULL!	#NULL!	1	58	1	1	0	0	2	1	#NULL!	#NULL!	#NULL!	#NULL!	4	2	1	1	1	#NULL!	1	2	60	4	2	1	1	15	0	#NULL!	#NULL!	#NULL!	#NULL!	1	#NULL!		#NULL!	#NULL!
1127	#NULL!	1	#NULL!	#NULL!	#NULL!	#NULL!	#NULL!	#NULL!	#NULL!	#NULL!	1	57	1	0	0	0	2	1	#NULL!	#NULL!	#NULL!	#NULL!	3	2	1	1	1	#NULL!	2	2	60	4	2	1	1	49	0	#NULL!	#NULL!	#NULL!	#NULL!	1	#NULL!		0	#NULL!
1128	#NULL!	1	#NULL!	#NULL!	#NULL!	#NULL!	#NULL!	#NULL!	#NULL!	#NULL!	1	68	2	0	0	0	2	1	#NULL!	#NULL!	#NULL!	#NULL!	4	2	1	1	1	#NULL!	1	2	54	2	1	0	#NULL!	4	1	#NULL!	#NULL!	#NULL!	#NULL!	#NULL!	#NULL!		#NULL!	#NULL!
1129	#NULL!	1	#NULL!	#NULL!	#NULL!	#NULL!	#NULL!	#NULL!	#NULL!	#NULL!	1	45	1	0	1	1	2	1	#NULL!	#NULL!	#NULL!	#NULL!	3	2	1	1	1	#NULL!	1	2	60	4	2	1	1	18	0	#NULL!	#NULL!	#NULL!	#NULL!	1	#NULL!		#NULL!	#NULL!
1130	#NULL!	2	#NULL!	#NULL!	#NULL!	#NULL!	#NULL!	#NULL!	#NULL!	#NULL!	1	58	1	1	1	#NULL!	2	1	#NULL!	#NULL!	#NULL!	#NULL!	3	2	1	1	1	#NULL!	2	2	54	2	1	0	#NULL!	73	0	#NULL!	#NULL!	#NULL!	#NULL!	1	#NULL!		0	#NULL!
1131	#NULL!	1	#NULL!	#NULL!	#NULL!	#NULL!	#NULL!	#NULL!	#NULL!	#NULL!	1	65	1	1	1	#NULL!	2	1	#NULL!	#NULL!	#NULL!	#NULL!	4	2	1	1	1	#NULL!	1	2	54	2	1	0	#NULL!	66	0	#NULL!	#NULL!	#NULL!	#NULL!	#NULL!	#NULL!		0	#NULL!
1132	#NULL!	1	#NULL!	#NULL!	#NULL!	#NULL!	#NULL!	#NULL!	#NULL!	#NULL!	1	52	1	0	1	1	2	1	#NULL!	#NULL!	#NULL!	#NULL!	3	2	1	1	1	#NULL!	2	2	54	2	1	0	#NULL!	25	1	#NULL!	#NULL!	#NULL!	#NULL!	1	#NULL!		#NULL!	#NULL!
1133	#NULL!	1	#NULL!	#NULL!	#NULL!	#NULL!	#NULL!	#NULL!	#NULL!	#NULL!	1	56	1	0	#NULL!	1	2	1	#NULL!	#NULL!	#NULL!	#NULL!	#NULL!	#NULL!	1	1	1	#NULL!	1	2	54	2	1	0	#NULL!	9	1	#NULL!	#NULL!	#NULL!	#NULL!	#NULL!	#NULL!		#NULL!	#NULL!
1134	#NULL!	1	#NULL!	#NULL!	#NULL!	#NULL!	#NULL!	#NULL!	#NULL!	#NULL!	1	60	1	0	0	0	2	1	#NULL!	#NULL!	#NULL!	#NULL!	#NULL!	#NULL!	1	1	1	#NULL!	1	2	60	4	2	1	1	15	1	#NULL!	#NULL!	#NULL!	#NULL!	#NULL!	#NULL!		#NULL!	#NULL!
1135	#NULL!	1	#NULL!	#NULL!	#NULL!	#NULL!	#NULL!	#NULL!	#NULL!	#NULL!	1	58	1	0	0	1	2	1	#NULL!	#NULL!	#NULL!	#NULL!	4	2	1	1	1	#NULL!	2	2	60	4	2	1	1	59	0	#NULL!	#NULL!	#NULL!	#NULL!	#NULL!	2		0	#NULL!
1136	#NULL!	1	#NULL!	#NULL!	#NULL!	#NULL!	#NULL!	#NULL!	#NULL!	#NULL!	1	53	1	0	1	1	2	1	#NULL!	#NULL!	#NULL!	#NULL!	3	2	1	1	1	#NULL!	2	2	54	2	1	0	#NULL!	11	1	#NULL!	#NULL!	#NULL!	#NULL!	#NULL!	#NULL!		#NULL!	#NULL!
1137	#NULL!	1	#NULL!	#NULL!	#NULL!	#NULL!	#NULL!	#NULL!	#NULL!	#NULL!	1	81	2	1	0	0	2	1	#NULL!	#NULL!	#NULL!	#NULL!	4	2	0	0	#NULL!	#NULL!	#NULL!	#NULL!	60	4	2	1	1	101	0	#NULL!	#NULL!	#NULL!	#NULL!	1	1		0	#NULL!
1138	#NULL!	1	#NULL!	#NULL!	#NULL!	#NULL!	#NULL!	#NULL!	#NULL!	#NULL!	1	62	1	1	1	1	2	1	#NULL!	#NULL!	#NULL!	#NULL!	3	2	1	1	1	#NULL!	2	2	50	1	1	0	#NULL!	21	1	#NULL!	#NULL!	#NULL!	#NULL!	#NULL!	#NULL!		#NULL!	#NULL!
1139	#NULL!	1	#NULL!	#NULL!	#NULL!	#NULL!	#NULL!	#NULL!	#NULL!	#NULL!	1	49	1	1	1	1	2	1	#NULL!	#NULL!	#NULL!	#NULL!	3	2	1	1	1	#NULL!	1	2	54	2	1	0	#NULL!	10	1	#NULL!	#NULL!	#NULL!	#NULL!	#NULL!	#NULL!		#NULL!	#NULL!
1140	#NULL!	2	#NULL!	#NULL!	#NULL!	#NULL!	24	1	4	1	1	72	2	1	#NULL!	#NULL!	2	1	#NULL!	#NULL!	#NULL!	#NULL!	4	2	0	0	#NULL!	#NULL!	#NULL!	#NULL!	60	4	2	1	1	125	0	#NULL!	#NULL!	#NULL!	#NULL!	#NULL!	#NULL!		0	0
1141	#NULL!	1	#NULL!	#NULL!	#NULL!	#NULL!	#NULL!	#NULL!	#NULL!	#NULL!	1	76	2	1	1	1	2	1	#NULL!	#NULL!	#NULL!	#NULL!	3	2	0	0	#NULL!	#NULL!	#NULL!	#NULL!	50.4	1	1	0	#NULL!	16	1	#NULL!	#NULL!	#NULL!	#NULL!	#NULL!	#NULL!		#NULL!	#NULL!
1142	#NULL!	1	#NULL!	#NULL!	#NULL!	#NULL!	#NULL!	#NULL!	#NULL!	#NULL!	1	59	1	0	1	1	2	1	#NULL!	#NULL!	#NULL!	#NULL!	3	2	1	1	1	#NULL!	2	2	54	2	1	0	#NULL!	40	1	#NULL!	#NULL!	#NULL!	#NULL!	#NULL!	#NULL!		#NULL!	#NULL!
1143	#NULL!	1	#NULL!	#NULL!	#NULL!	#NULL!	#NULL!	#NULL!	#NULL!	#NULL!	1	57	1	0	1	1	2	1	#NULL!	#NULL!	#NULL!	#NULL!	#NULL!	#NULL!	1	1	1	#NULL!	1	2	60	4	2	1	1	6	0	#NULL!	#NULL!	#NULL!	#NULL!	1	#NULL!		0	#NULL!
1144	#NULL!	1	#NULL!	#NULL!	#NULL!	#NULL!	#NULL!	#NULL!	#NULL!	#NULL!	1	56	1	0	0	1	2	1	#NULL!	#NULL!	#NULL!	#NULL!	#NULL!	#NULL!	1	1	1	#NULL!	2	2	60	4	2	1	1	28	1	#NULL!	#NULL!	#NULL!	#NULL!	1	1		#NULL!	#NULL!
1145	#NULL!	1	#NULL!	#NULL!	#NULL!	#NULL!	#NULL!	#NULL!	#NULL!	#NULL!	1	67	2	0	1	1	2	1	#NULL!	#NULL!	#NULL!	#NULL!	4	2	1	1	1	#NULL!	2	2	60	4	2	1	1	91	0	#NULL!	#NULL!	#NULL!	#NULL!	#NULL!	#NULL!		0	#NULL!
1146	#NULL!	1	#NULL!	#NULL!	#NULL!	#NULL!	31	1	3.4	#NULL!	1	67	2	0	1	0	2	1	#NULL!	#NULL!	#NULL!	#NULL!	4	2	1	1	1	#NULL!	2	2	54	2	1	0	#NULL!	2	1	#NULL!	#NULL!	#NULL!	#NULL!	#NULL!	#NULL!		#NULL!	#NULL!
1147	#NULL!	1	#NULL!	#NULL!	#NULL!	#NULL!	#NULL!	#NULL!	#NULL!	#NULL!	1	45	1	1	1	1	2	1	#NULL!	#NULL!	#NULL!	#NULL!	3	2	1	1	1	#NULL!	2	2	60	4	2	1	1	11	0	#NULL!	#NULL!	#NULL!	#NULL!	1	2		0	#NULL!
1148	#NULL!	1	#NULL!	#NULL!	#NULL!	#NULL!	#NULL!	#NULL!	#NULL!	#NULL!	1	59	1	1	1	0	2	1	#NULL!	#NULL!	#NULL!	#NULL!	3	2	1	1	1	#NULL!	1	2	60	4	2	1	1	76	0	#NULL!	#NULL!	#NULL!	#NULL!	#NULL!	#NULL!		0	#NULL!
1149	#NULL!	1	#NULL!	#NULL!	#NULL!	#NULL!	#NULL!	#NULL!	#NULL!	#NULL!	1	62	1	0	1	0	2	1	#NULL!	#NULL!	#NULL!	#NULL!	3	2	1	1	1	#NULL!	2	2	54	2	1	0	#NULL!	39	0	#NULL!	#NULL!	#NULL!	#NULL!	#NULL!	#NULL!		0	#NULL!
1150	#NULL!	1	#NULL!	#NULL!	#NULL!	#NULL!	#NULL!	#NULL!	#NULL!	#NULL!	1	61	1	0	#NULL!	1	2	1	#NULL!	#NULL!	#NULL!	#NULL!	3	2	1	1	1	#NULL!	1	2	54	2	1	0	#NULL!	12	1	#NULL!	#NULL!	#NULL!	#NULL!	#NULL!	#NULL!		#NULL!	#NULL!
1151	#NULL!	1	#NULL!	#NULL!	#NULL!	#NULL!	#NULL!	#NULL!	#NULL!	#NULL!	1	52	1	0	1	1	2	1	#NULL!	#NULL!	#NULL!	#NULL!	3	2	1	1	1	#NULL!	1	2	54	2	1	0	#NULL!	13	1	#NULL!	#NULL!	#NULL!	#NULL!	#NULL!	#NULL!		#NULL!	#NULL!
1152	#NULL!	1	#NULL!	#NULL!	#NULL!	#NULL!	#NULL!	#NULL!	#NULL!	#NULL!	1	63	1	0	1	1	2	1	#NULL!	#NULL!	#NULL!	#NULL!	3	2	1	1	1	#NULL!	2	2	54	2	1	0	#NULL!	20	1	#NULL!	#NULL!	#NULL!	#NULL!	#NULL!	#NULL!		#NULL!	#NULL!
1153	#NULL!	1	#NULL!	#NULL!	#NULL!	#NULL!	#NULL!	#NULL!	#NULL!	#NULL!	1	72	2	0	1	0	2	1	#NULL!	#NULL!	#NULL!	#NULL!	4	2	1	1	1	#NULL!	1	2	60	4	2	1	1	84	0	#NULL!	#NULL!	#NULL!	#NULL!	#NULL!	#NULL!		0	#NULL!
1154	#NULL!	1	#NULL!	#NULL!	#NULL!	#NULL!	#NULL!	#NULL!	#NULL!	#NULL!	1	67	2	0	0	0	2	1	#NULL!	#NULL!	#NULL!	#NULL!	#NULL!	#NULL!	1	1	1	#NULL!	2	2	50.4	1	1	0	#NULL!	12	1	#NULL!	#NULL!	#NULL!	#NULL!	#NULL!	3		#NULL!	#NULL!
1155	#NULL!	1	#NULL!	#NULL!	#NULL!	#NULL!	#NULL!	#NULL!	#NULL!	#NULL!	1	79	2	0	0	0	2	1	#NULL!	#NULL!	#NULL!	#NULL!	#NULL!	#NULL!	1	1	#NULL!	#NULL!	1	1	50.4	1	1	0	#NULL!	23	1	#NULL!	#NULL!	#NULL!	#NULL!	#NULL!	#NULL!		#NULL!	#NULL!
1156	#NULL!	1	#NULL!	#NULL!	#NULL!	#NULL!	#NULL!	#NULL!	#NULL!	#NULL!	1	71	2	0	0	0	2	1	#NULL!	#NULL!	#NULL!	#NULL!	#NULL!	#NULL!	1	1	#NULL!	#NULL!	1	1	50.4	1	1	0	#NULL!	4	1	#NULL!	#NULL!	#NULL!	#NULL!	1	#NULL!		#NULL!	#NULL!
1157	#NULL!	1	#NULL!	#NULL!	#NULL!	#NULL!	#NULL!	#NULL!	#NULL!	#NULL!	1	80	2	1	0	0	2	1	#NULL!	#NULL!	#NULL!	#NULL!	3	2	0	0	#NULL!	#NULL!	#NULL!	#NULL!	50.4	1	1	0	#NULL!	9	1	#NULL!	#NULL!	#NULL!	#NULL!	#NULL!	#NULL!		#NULL!	#NULL!
1158	#NULL!	1	#NULL!	#NULL!	#NULL!	#NULL!	#NULL!	#NULL!	#NULL!	#NULL!	1	67	2	1	1	0	2	1	#NULL!	#NULL!	#NULL!	#NULL!	4	2	1	1	1	#NULL!	1	2	60	4	2	1	1	72	0	#NULL!	#NULL!	#NULL!	#NULL!	#NULL!	#NULL!		0	#NULL!
1159	#NULL!	1	#NULL!	#NULL!	#NULL!	#NULL!	#NULL!	#NULL!	#NULL!	#NULL!	1	83	2	1	0	0	2	1	#NULL!	#NULL!	#NULL!	#NULL!	4	2	0	0	#NULL!	#NULL!	#NULL!	#NULL!	54	2	1	0	#NULL!	11	1	#NULL!	#NULL!	#NULL!	#NULL!	1	#NULL!		#NULL!	#NULL!
1160	#NULL!	1	#NULL!	#NULL!	#NULL!	#NULL!	#NULL!	#NULL!	#NULL!	#NULL!	1	75	2	1	0	0	2	1	#NULL!	#NULL!	#NULL!	#NULL!	4	2	1	1	#NULL!	#NULL!	2	1	54	2	1	0	#NULL!	20	1	#NULL!	#NULL!	#NULL!	#NULL!	1	1		#NULL!	#NULL!
1161	#NULL!	1	#NULL!	#NULL!	#NULL!	#NULL!	#NULL!	#NULL!	#NULL!	#NULL!	1	61	1	0	1	1	2	1	#NULL!	#NULL!	#NULL!	#NULL!	3	2	1	1	1	#NULL!	1	2	60	4	2	1	1	54	0	#NULL!	#NULL!	#NULL!	#NULL!	1	1		0	#NULL!
1162	#NULL!	1	#NULL!	#NULL!	#NULL!	#NULL!	#NULL!	#NULL!	#NULL!	#NULL!	1	64	1	0	#NULL!	#NULL!	2	1	#NULL!	#NULL!	#NULL!	#NULL!	1	#NULL!	1	1	1	#NULL!	1	2	54	2	1	0	#NULL!	12	0	#NULL!	#NULL!	#NULL!	#NULL!	#NULL!	#NULL!		0	#NULL!
1163	#NULL!	1	#NULL!	#NULL!	#NULL!	#NULL!	#NULL!	#NULL!	#NULL!	#NULL!	1	57	1	0	1	1	2	1	#NULL!	#NULL!	#NULL!	#NULL!	3	2	1	1	1	#NULL!	1	2	54	2	1	0	#NULL!	13	1	#NULL!	#NULL!	#NULL!	#NULL!	#NULL!	#NULL!		#NULL!	#NULL!
1164	#NULL!	1	#NULL!	#NULL!	#NULL!	#NULL!	#NULL!	#NULL!	#NULL!	#NULL!	1	56	1	0	1	1	2	1	#NULL!	#NULL!	#NULL!	#NULL!	4	2	1	1	1	#NULL!	2	2	60	4	2	1	1	23	0	#NULL!	#NULL!	#NULL!	#NULL!	#NULL!	#NULL!		0	#NULL!
1165	#NULL!	1	#NULL!	#NULL!	#NULL!	#NULL!	#NULL!	#NULL!	#NULL!	#NULL!	1	65	1	0	1	1	2	1	#NULL!	#NULL!	#NULL!	#NULL!	3	2	1	1	1	#NULL!	1	2	54	2	1	0	#NULL!	11	1	#NULL!	#NULL!	#NULL!	#NULL!	1	#NULL!		#NULL!	#NULL!
1166	#NULL!	1	#NULL!	#NULL!	#NULL!	#NULL!	#NULL!	#NULL!	#NULL!	#NULL!	1	55	1	0	1	1	2	1	#NULL!	#NULL!	#NULL!	#NULL!	3	2	1	1	#NULL!	#NULL!	1	1	60	4	2	1	1	7	0	#NULL!	#NULL!	#NULL!	#NULL!	#NULL!	#NULL!		0	#NULL!
1167	#NULL!	1	#NULL!	#NULL!	#NULL!	#NULL!	#NULL!	#NULL!	#NULL!	#NULL!	1	84	2	1	1	0	2	1	#NULL!	#NULL!	#NULL!	#NULL!	4	2	0	0	#NULL!	#NULL!	#NULL!	#NULL!	60	4	2	1	1	22	0	#NULL!	#NULL!	#NULL!	#NULL!	#NULL!	#NULL!		#NULL!	#NULL!
1168	#NULL!	2	#NULL!	#NULL!	#NULL!	#NULL!	#NULL!	#NULL!	#NULL!	#NULL!	1	67	2	1	1	#NULL!	2	1	#NULL!	#NULL!	#NULL!	#NULL!	4	2	0	0	#NULL!	#NULL!	#NULL!	#NULL!	60	4	2	1	1	63	0	#NULL!	#NULL!	#NULL!	#NULL!	#NULL!	2		#NULL!	#NULL!
1169	#NULL!	1	#NULL!	#NULL!	#NULL!	#NULL!	#NULL!	#NULL!	#NULL!	#NULL!	1	67	2	0	1	1	2	1	#NULL!	#NULL!	#NULL!	#NULL!	3	2	1	1	1	#NULL!	1	2	54	2	1	0	#NULL!	14	1	#NULL!	#NULL!	#NULL!	#NULL!	#NULL!	#NULL!		#NULL!	#NULL!
1170	#NULL!	1	#NULL!	#NULL!	#NULL!	#NULL!	#NULL!	#NULL!	#NULL!	#NULL!	1	64	1	0	0	0	2	1	#NULL!	#NULL!	#NULL!	#NULL!	3	2	1	1	#NULL!	#NULL!	#NULL!	2	54	2	1	0	#NULL!	40	1	#NULL!	#NULL!	#NULL!	#NULL!	1	#NULL!		#NULL!	#NULL!
1171	#NULL!	1	#NULL!	#NULL!	#NULL!	#NULL!	#NULL!	#NULL!	#NULL!	#NULL!	1	41	1	0	1	1	2	1	#NULL!	#NULL!	#NULL!	#NULL!	3	2	1	1	#NULL!	#NULL!	2	2	54	2	1	0	#NULL!	34	1	#NULL!	#NULL!	#NULL!	#NULL!	1	2		#NULL!	#NULL!
1172	#NULL!	1	#NULL!	#NULL!	#NULL!	#NULL!	#NULL!	#NULL!	#NULL!	#NULL!	1	63	1	1	1	1	2	1	#NULL!	#NULL!	#NULL!	#NULL!	3	2	1	1	1	#NULL!	1	2	54	2	1	0	#NULL!	6	1	#NULL!	#NULL!	#NULL!	#NULL!	#NULL!	#NULL!		#NULL!	#NULL!
1173	#NULL!	1	#NULL!	#NULL!	#NULL!	#NULL!	#NULL!	#NULL!	#NULL!	#NULL!	1	67	2	0	0	1	2	1	#NULL!	#NULL!	#NULL!	#NULL!	4	2	1	1	1	#NULL!	1	2	60	4	2	1	1	52	0	#NULL!	#NULL!	#NULL!	#NULL!	1	#NULL!		0	#NULL!
1174	#NULL!	2	#NULL!	#NULL!	#NULL!	#NULL!	#NULL!	#NULL!	#NULL!	#NULL!	1	76	2	1	1	1	2	1	#NULL!	#NULL!	#NULL!	#NULL!	3	2	1	1	#NULL!	#NULL!	1	1	54	2	1	0	#NULL!	32	1	#NULL!	#NULL!	#NULL!	#NULL!	#NULL!	1		#NULL!	#NULL!
1175	#NULL!	1	#NULL!	#NULL!	#NULL!	#NULL!	#NULL!	#NULL!	#NULL!	#NULL!	1	48	1	0	1	1	2	1	#NULL!	#NULL!	#NULL!	#NULL!	#NULL!	#NULL!	1	1	1	#NULL!	2	2	60	4	2	1	1	31	1	#NULL!	#NULL!	#NULL!	#NULL!	#NULL!	#NULL!		#NULL!	#NULL!
1176	#NULL!	1	#NULL!	#NULL!	#NULL!	#NULL!	#NULL!	#NULL!	#NULL!	#NULL!	1	59	1	1	1	1	2	1	#NULL!	#NULL!	#NULL!	#NULL!	3	2	1	1	1	#NULL!	2	2	54	2	1	0	#NULL!	38	1	#NULL!	#NULL!	#NULL!	#NULL!	#NULL!	1		#NULL!	#NULL!
1177	#NULL!	1	#NULL!	#NULL!	#NULL!	#NULL!	#NULL!	#NULL!	#NULL!	#NULL!	1	60	1	1	0	0	2	1	#NULL!	#NULL!	#NULL!	#NULL!	#NULL!	#NULL!	1	1	1	#NULL!	1	2	50	1	1	0	#NULL!	36	1	#NULL!	#NULL!	#NULL!	#NULL!	#NULL!	#NULL!		#NULL!	#NULL!
1178	#NULL!	2	#NULL!	#NULL!	#NULL!	#NULL!	#NULL!	#NULL!	#NULL!	#NULL!	2		2	#NULL!	#NULL!	#NULL!	2	2	2	1	0	1	1	#NULL!	1	#NULL!	#NULL!	#NULL!	#NULL!	2	63.4	5	3	1	2	10	1	1	0	#NULL!	3	1	0	1	#NULL!	#NULL!
1179	#NULL!	2	#NULL!	#NULL!	#NULL!	#NULL!	#NULL!	#NULL!	#NULL!	#NULL!	1		2	#NULL!	#NULL!	#NULL!	2	1	2	1	0	1	1	#NULL!	1	#NULL!	#NULL!	#NULL!	#NULL!	2	64	5	3	1	2	32.3	1	1	0	#NULL!	1	0	1	1	#NULL!	#NULL!
1180	#NULL!	2	#NULL!	#NULL!	#NULL!	#NULL!	#NULL!	#NULL!	#NULL!	#NULL!	1		1	#NULL!	#NULL!	#NULL!	2	1	2	1	0	1	1	#NULL!	1	#NULL!	#NULL!	5	2	2	60	4	2	1	1	14	1	2	1	#NULL!	1	1	0	1	#NULL!	#NULL!
1181	#NULL!	2	#NULL!	#NULL!	#NULL!	#NULL!	#NULL!	#NULL!	#NULL!	#NULL!	1		2	#NULL!	#NULL!	#NULL!	2	1	2	1	0	1	1	#NULL!	1	0	#NULL!	1	1	2	64	5	3	1	2	70.8	1	1	0	#NULL!	0	0	0	1	0	#NULL!
1182	#NULL!	1	#NULL!	#NULL!	#NULL!	#NULL!	#NULL!	#NULL!	#NULL!	#NULL!	1		1	#NULL!	#NULL!	#NULL!	2	1	2	1	0	1	1	#NULL!	1	#NULL!	#NULL!	0	#NULL!	1	64	5	3	1	2	57	1	2	0	#NULL!	0	0	0	1	0	#NULL!
1183	#NULL!	2	#NULL!	#NULL!	#NULL!	#NULL!	#NULL!	#NULL!	#NULL!	#NULL!	1		2	#NULL!	#NULL!	#NULL!	2	1	2	1	0	1	1	#NULL!	1	1	#NULL!	0	#NULL!	2	58.8	3	1	0	#NULL!	44	1	0	4	#NULL!	0	0	0	1	0	#NULL!
1184	#NULL!	2	#NULL!	#NULL!	#NULL!	#NULL!	#NULL!	#NULL!	#NULL!	#NULL!	2		1	#NULL!	#NULL!	#NULL!	2	1	2	1	0	1	1	#NULL!	1	#NULL!	#NULL!	2	1	2	60	4	2	1	1	43	1	2	1	#NULL!	1	#NULL!	#NULL!	1	0	#NULL!
1185	#NULL!	2	#NULL!	#NULL!	#NULL!	#NULL!	#NULL!	#NULL!	#NULL!	#NULL!	2		2	#NULL!	#NULL!	#NULL!	2	1	2	1	0	1	1	#NULL!	1	#NULL!	#NULL!	0	#NULL!	1	60	4	2	1	1	30	1	1	0	#NULL!	0	1	1	1	#NULL!	#NULL!
1186	#NULL!	2	#NULL!	#NULL!	#NULL!	#NULL!	#NULL!	#NULL!	#NULL!	#NULL!	2		2	#NULL!	#NULL!	#NULL!	2	1	2	1	0	1	1	#NULL!	1	#NULL!	#NULL!	0	#NULL!	2	70	5	3	1	2	72.5	1	2	0	#NULL!	0	1	0	1	#NULL!	#NULL!
1187	#NULL!	2	#NULL!	#NULL!	#NULL!	#NULL!	#NULL!	#NULL!	#NULL!	#NULL!	1		1	#NULL!	#NULL!	#NULL!	2	1	2	1	0	1	1	#NULL!	1	#NULL!	#NULL!	6	2	2	62	4	2	1	1	19	1	1	0	#NULL!	2	#NULL!	#NULL!	1	#NULL!	#NULL!
1188	#NULL!	2	#NULL!	#NULL!	#NULL!	#NULL!	#NULL!	#NULL!	#NULL!	#NULL!	2		2	#NULL!	#NULL!	#NULL!	2	1	4	2	0	1	3	2	1	#NULL!	#NULL!	#NULL!	#NULL!	2	62	4	2	1	1	12	1	2	1	#NULL!	2	#NULL!	#NULL!	2	#NULL!	#NULL!
1189	#NULL!	2	#NULL!	#NULL!	#NULL!	#NULL!	#NULL!	#NULL!	#NULL!	#NULL!	2		2	#NULL!	#NULL!	#NULL!	2	1	2	1	1	2	2	#NULL!	1	#NULL!	#NULL!	#NULL!	#NULL!	2	62	4	2	1	1	78	1	2	0	#NULL!	0	#NULL!	#NULL!	1	#NULL!	#NULL!
1190	#NULL!	2	#NULL!	#NULL!	#NULL!	#NULL!	#NULL!	#NULL!	#NULL!	#NULL!	1		1	#NULL!	#NULL!	#NULL!	2	1	2	2	1	2	2	#NULL!	1	0	#NULL!	2	1	1	56	3	1	0	#NULL!	19	1	1	0	#NULL!	0	0	0	1	0	#NULL!
1191	#NULL!	2	#NULL!	#NULL!	#NULL!	#NULL!	#NULL!	#NULL!	#NULL!	#NULL!	1		2	#NULL!	#NULL!	#NULL!	2	1	2	1	1	2	2	#NULL!	1	0	#NULL!	#NULL!	#NULL!	2	56	3	1	0	#NULL!	31	1	1	0	#NULL!	1	0	0	1	0	#NULL!
1192	#NULL!	1	#NULL!	#NULL!	#NULL!	#NULL!	#NULL!	#NULL!	#NULL!	#NULL!	1		1	#NULL!	#NULL!	#NULL!	2	1	2	1	1	2	2	#NULL!	1	1	#NULL!	3	1	2	64	5	3	1	2	14	1	1	0	#NULL!	1	1	1	1	#NULL!	#NULL!
1193	#NULL!	1	#NULL!	#NULL!	#NULL!	#NULL!	#NULL!	#NULL!	#NULL!	#NULL!	1		1	#NULL!	#NULL!	#NULL!	2	1	2	1	1	2	2	#NULL!	1	#NULL!	#NULL!	3	1	2	64	5	3	1	2	14	1	1	0	#NULL!	1	1	1	1	#NULL!	#NULL!
1194	#NULL!	2	#NULL!	#NULL!	#NULL!	#NULL!	#NULL!	#NULL!	#NULL!	#NULL!	1		2	#NULL!	#NULL!	#NULL!	2	1	2	1	1	2	2	#NULL!	1	#NULL!	#NULL!	0	#NULL!	1	64	5	3	1	2	15	1	2	1	#NULL!	0	0	0	1	0	#NULL!
1195	#NULL!	2	#NULL!	#NULL!	#NULL!	#NULL!	#NULL!	#NULL!	#NULL!	#NULL!	1		2	#NULL!	#NULL!	#NULL!	2	1	2	1	1	2	2	#NULL!	1	#NULL!	#NULL!	0	#NULL!	2	62	4	2	1	1	14.8	1	2	2	#NULL!	0	1	0	1	#NULL!	#NULL!
1196	#NULL!	2	#NULL!	#NULL!	#NULL!	#NULL!	#NULL!	#NULL!	#NULL!	#NULL!	1		2	#NULL!	#NULL!	#NULL!	2	2	2	1	1	2	2	#NULL!	1	#NULL!	#NULL!	0	#NULL!	2	64	5	3	1	2	13	1	0	0	#NULL!	0	1	0	1	#NULL!	#NULL!
1197	#NULL!	2	#NULL!	#NULL!	#NULL!	#NULL!	#NULL!	#NULL!	#NULL!	#NULL!	1		1	#NULL!	#NULL!	#NULL!	2	1	2	1	1	2	2	#NULL!	1	#NULL!	#NULL!	0	#NULL!	2	66	5	3	1	2	33	1	1	0	#NULL!	2	0	0	1	0	#NULL!
1198	#NULL!	2	#NULL!	#NULL!	#NULL!	#NULL!	#NULL!	#NULL!	#NULL!	#NULL!	1		1	#NULL!	#NULL!	#NULL!	2	1	2	1	1	2	2	#NULL!	1	#NULL!	#NULL!	#NULL!	#NULL!	2	64	5	3	1	2	12.7	1	0	0	#NULL!	2	1	0	1	#NULL!	#NULL!
1199	#NULL!	1	#NULL!	#NULL!	#NULL!	#NULL!	#NULL!	#NULL!	#NULL!	#NULL!	1		1	#NULL!	#NULL!	#NULL!	2	1	3	2	0	1	2	#NULL!	1	#NULL!	#NULL!	4	1	2	60	4	2	1	1	17	1	2	0	#NULL!	1	0	1	1	#NULL!	#NULL!
1200	#NULL!	2	#NULL!	#NULL!	#NULL!	#NULL!	#NULL!	#NULL!	#NULL!	#NULL!	1		1	#NULL!	#NULL!	#NULL!	2	1	3	2	0	1	2	#NULL!	1	#NULL!	#NULL!	3	1	1	62	4	2	1	1	40	1	1	0	#NULL!	0	#NULL!	#NULL!	2	#NULL!	#NULL!
1201	#NULL!	2	2	#NULL!	#NULL!	#NULL!	#NULL!	#NULL!	#NULL!	#NULL!	1		2	#NULL!	#NULL!	#NULL!	2	1	3	2	0	1	2	#NULL!	1	#NULL!	#NULL!	7	2	2	60	4	2	1	1	14	1	0	0	#NULL!	0	1	0	1	#NULL!	#NULL!
1202	#NULL!	2	#NULL!	#NULL!	#NULL!	#NULL!	#NULL!	#NULL!	#NULL!	#NULL!	1		2	#NULL!	#NULL!	#NULL!	2	2	3	2	0	1	2	#NULL!	1	#NULL!	#NULL!	0	#NULL!	2	66	5	3	1	2	16.4	1	0	0	#NULL!	2	1	0	1	#NULL!	#NULL!
1203	#NULL!	1	#NULL!	#NULL!	#NULL!	#NULL!	#NULL!	#NULL!	#NULL!	#NULL!	2		2	#NULL!	#NULL!	#NULL!	2	1	3	2	0	1	2	#NULL!	1	#NULL!	#NULL!	#NULL!	#NULL!	2	64	5	3	1	2	52	1	0	0	#NULL!	1	0	0	1	0	#NULL!
1204	#NULL!	2	#NULL!	#NULL!	#NULL!	#NULL!	#NULL!	#NULL!	#NULL!	#NULL!	1		2	#NULL!	#NULL!	#NULL!	2	1	3	2	0	1	2	#NULL!	1	#NULL!	#NULL!	0	#NULL!	1	64	5	3	1	2	36	1	0	1	#NULL!	0	1	0	1	#NULL!	#NULL!
1205	#NULL!	2	#NULL!	#NULL!	#NULL!	#NULL!	#NULL!	#NULL!	#NULL!	#NULL!	2		1	#NULL!	#NULL!	#NULL!	2	1	3	2	0	1	2	#NULL!	1	#NULL!	#NULL!	0	#NULL!	2	66	5	3	1	2	21.3	1	0	1	#NULL!	3	1	0	1	#NULL!	#NULL!
1206	#NULL!	2	#NULL!	#NULL!	#NULL!	#NULL!	#NULL!	#NULL!	#NULL!	#NULL!	1		1	#NULL!	#NULL!	#NULL!	2	1	1	1	1	2	1	#NULL!	1	#NULL!	#NULL!	0	#NULL!	2	60	4	2	1	1	109	1	2	1	#NULL!	2	0	0	1	0	#NULL!
1207	#NULL!	2	#NULL!	#NULL!	#NULL!	#NULL!	18	1	4	#NULL!	1		2	#NULL!	#NULL!	#NULL!	2	1	2	1	0	1	1	#NULL!	1	#NULL!	#NULL!	#NULL!	#NULL!	2	64	5	3	1	2	62.5	1	2	0	#NULL!	0	#NULL!	#NULL!	1	0	#NULL!
1208	#NULL!	2	#NULL!	#NULL!	#NULL!	#NULL!	#NULL!	#NULL!	#NULL!	#NULL!	2		2	#NULL!	#NULL!	#NULL!	2	1	2	1	0	1	1	#NULL!	1	#NULL!	#NULL!	4	1	2	62	4	2	1	1	18	1	2	0	#NULL!	0	1	0	1	#NULL!	#NULL!
1209	#NULL!	2	#NULL!	#NULL!	#NULL!	#NULL!	#NULL!	#NULL!	#NULL!	#NULL!	1		2	#NULL!	#NULL!	#NULL!	2	1	2	1	0	1	1	#NULL!	1	#NULL!	#NULL!	0	#NULL!	1	64	5	3	1	2	19	1	2	2	#NULL!	1	1	1	1	#NULL!	#NULL!
1210	#NULL!	2	#NULL!	#NULL!	#NULL!	#NULL!	#NULL!	#NULL!	#NULL!	#NULL!	2		2	#NULL!	#NULL!	#NULL!	2	1	2	1	0	1	1	#NULL!	1	#NULL!	#NULL!	0	#NULL!	2	62	4	2	1	1	42.6	1	1	1	#NULL!	2	0	1	1	#NULL!	#NULL!
1211	#NULL!	2	#NULL!	#NULL!	#NULL!	#NULL!	#NULL!	#NULL!	#NULL!	#NULL!	2		2	#NULL!	#NULL!	#NULL!	2	1	2	1	0	1	1	#NULL!	1	1	#NULL!	0	#NULL!	2	56	3	1	0	#NULL!	22	1	0	0	#NULL!	4	0	0	1	0	#NULL!
1212	#NULL!	2	#NULL!	#NULL!	#NULL!	#NULL!	#NULL!	#NULL!	#NULL!	#NULL!	2		2	#NULL!	#NULL!	#NULL!	2	1	2	1	0	1	1	#NULL!	1	#NULL!	#NULL!	#NULL!	#NULL!	1	66	5	3	1	2	31	1	1	1	#NULL!	0	1	0	1	#NULL!	#NULL!
1213	#NULL!	1	#NULL!	#NULL!	#NULL!	#NULL!	#NULL!	#NULL!	#NULL!	#NULL!	1		2	#NULL!	#NULL!	#NULL!	2	1	4	2	1	1	1	#NULL!	1	0	#NULL!	0	#NULL!	2	50	1	1	0	#NULL!	33	1	1	1	#NULL!	0	0	0	1	0	#NULL!
1214	#NULL!	2	#NULL!	#NULL!	#NULL!	#NULL!	39	2	8	#NULL!	2		1	#NULL!	#NULL!	#NULL!	2	1	2	1	0	1	1	#NULL!	1	0	#NULL!	#NULL!	#NULL!	2	64	5	3	1	2	76	1	1	0	#NULL!	1	0	0	1	0	#NULL!
1215	#NULL!	2	#NULL!	#NULL!	#NULL!	#NULL!	#NULL!	#NULL!	#NULL!	#NULL!	1		1	#NULL!	#NULL!	#NULL!	2	1	2	1	0	1	1	#NULL!	1	#NULL!	#NULL!	6	2	2	64	5	3	1	2	42	1	0	0	#NULL!	0	0	0	1	0	#NULL!
1216	#NULL!	2	#NULL!	#NULL!	#NULL!	#NULL!	#NULL!	#NULL!	#NULL!	#NULL!	2		1	#NULL!	#NULL!	#NULL!	2	1	2	1	0	1	1	#NULL!	1	#NULL!	#NULL!	#NULL!	#NULL!	2	64	5	3	1	2	45.5	1	1	1	#NULL!	2	0	1	1	#NULL!	#NULL!
1217	#NULL!	2	#NULL!	#NULL!	#NULL!	#NULL!	#NULL!	#NULL!	#NULL!	#NULL!	2		1	#NULL!	#NULL!	#NULL!	2	1	2	1	0	1	1	#NULL!	1	#NULL!	#NULL!	#NULL!	#NULL!	2	60	4	2	1	1	15.8	1	1	0	#NULL!	0	1	0	1	#NULL!	#NULL!
1218	#NULL!	2	#NULL!	#NULL!	#NULL!	#NULL!	#NULL!	#NULL!	#NULL!	#NULL!	1		1	#NULL!	#NULL!	#NULL!	2	2	2	1	0	1	1	#NULL!	1	#NULL!	#NULL!	#NULL!	#NULL!	2	66	5	3	1	2	48.2	1	0	0	#NULL!	0	1	0	1	#NULL!	#NULL!
1219	#NULL!	2	#NULL!	#NULL!	#NULL!	#NULL!	#NULL!	#NULL!	#NULL!	#NULL!	1		2	#NULL!	#NULL!	#NULL!	2	1	2	1	0	1	1	#NULL!	1	#NULL!	#NULL!	#NULL!	#NULL!	2	60	4	2	1	1	12	1	2	0	#NULL!	1	1	0	1	#NULL!	#NULL!
1220	#NULL!	2	#NULL!	#NULL!	#NULL!	#NULL!	#NULL!	#NULL!	#NULL!	#NULL!	1		2	#NULL!	#NULL!	#NULL!	2	1	2	1	0	1	1	#NULL!	1	#NULL!	#NULL!	2	1	#NULL!	60	4	2	1	1	12	1	1	0	#NULL!	1	1	0	1	#NULL!	#NULL!
1221	#NULL!	2	#NULL!	#NULL!	#NULL!	#NULL!	#NULL!	#NULL!	#NULL!	#NULL!	1		2	#NULL!	#NULL!	#NULL!	2	1	2	1	0	1	1	#NULL!	0	#NULL!	#NULL!	#NULL!	#NULL!	#NULL!	60	4	2	1	1	15	1	0	0	#NULL!	0	1	1	1	#NULL!	#NULL!
1222	#NULL!	2	#NULL!	#NULL!	#NULL!	#NULL!	#NULL!	#NULL!	#NULL!	#NULL!	1		2	#NULL!	#NULL!	#NULL!	2	1	2	1	0	1	1	#NULL!	1	0	#NULL!	3	1	#NULL!	56	3	1	0	#NULL!	51.4	1	1	0	#NULL!	0	1	0	1	#NULL!	#NULL!
1223	#NULL!	2	#NULL!	#NULL!	#NULL!	#NULL!	#NULL!	#NULL!	#NULL!	#NULL!	1		2	#NULL!	#NULL!	#NULL!	2	1	2	1	0	1	1	#NULL!	1	#NULL!	#NULL!	2	1	#NULL!	64	5	3	1	2	35.7	1	1	2	#NULL!	0	0	1	1	#NULL!	#NULL!
1224	#NULL!	2	#NULL!	#NULL!	#NULL!	#NULL!	#NULL!	#NULL!	#NULL!	#NULL!	1		2	#NULL!	#NULL!	#NULL!	2	2	2	1	0	1	1	#NULL!	1	#NULL!	#NULL!	6	2	#NULL!	64	5	3	1	2	31	1	1	0	#NULL!	0	0	0	1	#NULL!	#NULL!
1225	#NULL!	2	#NULL!	#NULL!	#NULL!	#NULL!	#NULL!	#NULL!	#NULL!	#NULL!	1		1	#NULL!	#NULL!	#NULL!	2	2	2	1	0	1	1	#NULL!	0	#NULL!	#NULL!	0	#NULL!	#NULL!	64	5	3	1	2	72	1	1	1	#NULL!	0	1	0	1	#NULL!	#NULL!
1226	#NULL!	2	#NULL!	#NULL!	#NULL!	#NULL!	#NULL!	#NULL!	#NULL!	#NULL!	1		1	#NULL!	#NULL!	#NULL!	2	2	2	1	0	1	1	#NULL!	0	#NULL!	#NULL!	0	#NULL!	#NULL!	66	5	3	1	2	10	1	2	#NULL!	#NULL!	1	#NULL!	#NULL!		0	#NULL!
1227	#NULL!	2	#NULL!	#NULL!	#NULL!	#NULL!	#NULL!	#NULL!	#NULL!	#NULL!	2		1	#NULL!	#NULL!	#NULL!	2	1	2	1	0	1	1	#NULL!	1	#NULL!	#NULL!	1	1	#NULL!	66	5	3	1	2	16.3	1	2	2	#NULL!	1	1	1	1	#NULL!	#NULL!
1228	#NULL!	2	#NULL!	#NULL!	#NULL!	#NULL!	#NULL!	#NULL!	#NULL!	#NULL!	2		2	#NULL!	#NULL!	#NULL!	2	1	4	2	0	1	3	2	0	#NULL!	#NULL!	#NULL!	#NULL!	#NULL!	62	4	2	1	1	6	1	1	0	#NULL!	2	0	0	1	0	#NULL!
1229	#NULL!	2	#NULL!	#NULL!	#NULL!	#NULL!	#NULL!	#NULL!	#NULL!	#NULL!	1		1	#NULL!	#NULL!	#NULL!	2	2	4	2	0	1	3	2	1	#NULL!	#NULL!	2	1	#NULL!	64	5	3	1	2	61	1	1	0	#NULL!	1	0	0	1	0	#NULL!
1230	#NULL!	2	#NULL!	#NULL!	#NULL!	#NULL!	#NULL!	#NULL!	#NULL!	#NULL!	2		1	#NULL!	#NULL!	#NULL!	2	1	4	2	0	1	3	2	0	#NULL!	#NULL!	#NULL!	#NULL!	#NULL!	60	4	2	1	1	16	1	1	0	#NULL!	0	1	0	1	#NULL!	#NULL!
1231	#NULL!	2	#NULL!	#NULL!	#NULL!	#NULL!	#NULL!	#NULL!	#NULL!	#NULL!	1		1	#NULL!	#NULL!	#NULL!	2	1	4	2	0	1	3	2	1	#NULL!	#NULL!	5	2	#NULL!	64	5	3	1	2	43.6	1	2	0	#NULL!	1	1	1	1	#NULL!	#NULL!
1232	#NULL!	2	#NULL!	#NULL!	#NULL!	#NULL!	#NULL!	#NULL!	#NULL!	#NULL!	2		2	#NULL!	#NULL!	#NULL!	2	1	4	2	0	1	3	2	1	#NULL!	#NULL!	6	2	#NULL!	64	5	3	1	2	52	1	1	0	#NULL!	2	1	0	1	#NULL!	#NULL!
1233	#NULL!	2	#NULL!	#NULL!	#NULL!	#NULL!	#NULL!	#NULL!	#NULL!	#NULL!	2		2	#NULL!	#NULL!	#NULL!	2	1	4	2	0	1	3	2	1	#NULL!	#NULL!	6	2	#NULL!	64	5	3	1	2	52.5	1	1	0	#NULL!	2	1	0	1	#NULL!	#NULL!
1234	#NULL!	2	#NULL!	#NULL!	#NULL!	#NULL!	#NULL!	#NULL!	#NULL!	#NULL!	2		2	#NULL!	#NULL!	#NULL!	2	1	4	2	1	2	3	2	1	#NULL!	#NULL!	1	1	#NULL!	62	4	2	1	1	35.1	1	0	0	#NULL!	0	1	0	1	#NULL!	#NULL!
1235	#NULL!	2	#NULL!	#NULL!	#NULL!	#NULL!	#NULL!	#NULL!	#NULL!	#NULL!	2		2	#NULL!	#NULL!	#NULL!	2	1	4	2	0	1	3	2	0	#NULL!	#NULL!	0	#NULL!	#NULL!	64	5	3	1	2	11	1	0	0	#NULL!	0	1	0	1	#NULL!	#NULL!
1236	#NULL!	2	#NULL!	#NULL!	#NULL!	#NULL!	#NULL!	#NULL!	#NULL!	#NULL!	1		2	#NULL!	#NULL!	#NULL!	2	1	4	2	0	1	3	2	0	#NULL!	#NULL!	#NULL!	#NULL!	#NULL!	60	4	2	1	1	15.3	1	0	0	#NULL!	0	1	0	1	#NULL!	#NULL!
1237	#NULL!	2	#NULL!	#NULL!	#NULL!	#NULL!	#NULL!	#NULL!	#NULL!	#NULL!	1		2	#NULL!	#NULL!	#NULL!	2	1	4	2	0	1	3	2	0	#NULL!	#NULL!	0	#NULL!	#NULL!	60	4	2	1	1	15.3	1	0	0	#NULL!	0	1	0	1	#NULL!	#NULL!
1238	#NULL!	2	#NULL!	#NULL!	#NULL!	#NULL!	#NULL!	#NULL!	#NULL!	#NULL!	1		2	#NULL!	#NULL!	#NULL!	2	1	4	2	0	1	3	2	0	#NULL!	#NULL!	#NULL!	#NULL!	#NULL!	60	4	2	1	1	8.5	1	2	0	#NULL!	0	1	0	1	#NULL!	#NULL!
1239	#NULL!	2	#NULL!	#NULL!	#NULL!	#NULL!	#NULL!	#NULL!	#NULL!	#NULL!	2		2	#NULL!	#NULL!	#NULL!	2	1	4	2	0	1	3	2	0	#NULL!	#NULL!	#NULL!	#NULL!	#NULL!	64	5	3	1	2	39	1	1	0	#NULL!	1	1	0	1	#NULL!	#NULL!
1240	#NULL!	2	#NULL!	#NULL!	#NULL!	#NULL!	#NULL!	#NULL!	#NULL!	#NULL!	2		1	#NULL!	#NULL!	#NULL!	2	1	4	2	0	1	3	2	1	#NULL!	#NULL!	1	1	#NULL!	60	4	2	1	1	24	1	1	0	#NULL!	2	1	0	1	#NULL!	#NULL!
1241	#NULL!	2	#NULL!	#NULL!	#NULL!	#NULL!	#NULL!	#NULL!	#NULL!	#NULL!	2		2	#NULL!	#NULL!	#NULL!	2	1	2	1	1	2	2	#NULL!	1	#NULL!	#NULL!	1	1	#NULL!	59.4	4	2	1	1	40.9	1	1	0	#NULL!	0	#NULL!	#NULL!	2	0	#NULL!
1242	#NULL!	2	#NULL!	#NULL!	#NULL!	#NULL!	#NULL!	#NULL!	#NULL!	#NULL!	1		2	#NULL!	#NULL!	#NULL!	2	1	2	1	1	2	2	#NULL!	0	#NULL!	#NULL!	0	#NULL!	#NULL!	60	4	2	1	1	54.5	1	1	0	#NULL!	0	#NULL!	#NULL!	1	0	#NULL!
1243	#NULL!	2	#NULL!	#NULL!	#NULL!	#NULL!	#NULL!	#NULL!	#NULL!	#NULL!	2		2	#NULL!	#NULL!	#NULL!	2	1	3	2	1	2	2	#NULL!	0	#NULL!	#NULL!	0	#NULL!	#NULL!	60.03	4	2	1	1	45	1	0	0	#NULL!	2	#NULL!	#NULL!	2	0	#NULL!
1244	#NULL!	2	#NULL!	#NULL!	#NULL!	#NULL!	#NULL!	#NULL!	#NULL!	#NULL!	2		2	#NULL!	#NULL!	#NULL!	2	1	3	2	1	2	2	#NULL!	0	#NULL!	#NULL!	0	#NULL!	#NULL!	60.03	4	2	1	1	44.2	1	0	0	#NULL!	2	1	1	1	#NULL!	#NULL!
1245	#NULL!	2	#NULL!	#NULL!	#NULL!	#NULL!	#NULL!	#NULL!	#NULL!	#NULL!	2		1	#NULL!	#NULL!	#NULL!	2	1	3	2	0	1	2	#NULL!	0	#NULL!	#NULL!	0	#NULL!	#NULL!	64	5	3	1	2	39.2	1	1	2	#NULL!	2	0	1	1	#NULL!	#NULL!
1246	#NULL!	2	#NULL!	#NULL!	#NULL!	#NULL!	#NULL!	#NULL!	#NULL!	#NULL!	1		1	1	#NULL!	#NULL!	2	1	3	2	0	1	2	#NULL!	0	1	#NULL!	0	#NULL!	#NULL!	50	1	1	0	#NULL!	15	1	1	0	#NULL!	2	1	0	2	#NULL!	#NULL!
1247	#NULL!	2	#NULL!	#NULL!	#NULL!	#NULL!	#NULL!	#NULL!	#NULL!	#NULL!	1		2	#NULL!	#NULL!	#NULL!	2	1	2	1	0	1	1	#NULL!	1	#NULL!	#NULL!	6	2	#NULL!	60	4	2	1	1	22	1	2	0	#NULL!	0	#NULL!	#NULL!	2	#NULL!	#NULL!
1248	#NULL!	2	#NULL!	#NULL!	#NULL!	#NULL!	#NULL!	#NULL!	#NULL!	#NULL!	1		1	#NULL!	#NULL!	#NULL!	2	1	2	1	0	1	1	#NULL!	0	#NULL!	#NULL!	0	#NULL!	#NULL!	66	5	3	1	2	48.2	1	2	2	#NULL!	0	1	0	1	#NULL!	#NULL!
1249	#NULL!	2	#NULL!	#NULL!	#NULL!	#NULL!	#NULL!	#NULL!	#NULL!	#NULL!	1		2	#NULL!	#NULL!	#NULL!	2	1	2	1	0	1	1	#NULL!	1	#NULL!	#NULL!	4	1	#NULL!	60	4	2	1	1	36	1	2	0	#NULL!	3	0	1	1	#NULL!	#NULL!
1250	#NULL!	2	#NULL!	#NULL!	#NULL!	#NULL!	#NULL!	#NULL!	#NULL!	#NULL!	1		1	#NULL!	#NULL!	#NULL!	2	1	2	1	0	1	1	#NULL!	0	#NULL!	#NULL!	0	#NULL!	#NULL!	64	5	3	1	2	14	1	1	2	#NULL!	1	1	0	1	#NULL!	#NULL!
1251	#NULL!	2	#NULL!	#NULL!	#NULL!	#NULL!	#NULL!	#NULL!	#NULL!	#NULL!	1		2	#NULL!	#NULL!	#NULL!	2	1	4	2	1	2	3	2	0	#NULL!	#NULL!	0	#NULL!	#NULL!	60	4	2	1	1	13	1	1	0	#NULL!	3	1	0	1	#NULL!	#NULL!
1252	#NULL!	2	#NULL!	#NULL!	#NULL!	#NULL!	#NULL!	#NULL!	#NULL!	#NULL!	1		2	#NULL!	#NULL!	#NULL!	2	1	4	2	0	1	3	2	0	#NULL!	#NULL!	0	#NULL!	#NULL!	62	4	2	1	1	10.5	1	0	0	#NULL!	2	1	0	1	#NULL!	#NULL!
1253	#NULL!	2	#NULL!	#NULL!	#NULL!	#NULL!	#NULL!	#NULL!	#NULL!	#NULL!	1		1	#NULL!	#NULL!	#NULL!	2	1	4	2	0	1	3	2	1	#NULL!	#NULL!	3	1	#NULL!	60	4	2	1	1	37	1	2	0	#NULL!	3	#NULL!	#NULL!	1	0	#NULL!
1254	#NULL!	2	#NULL!	#NULL!	#NULL!	#NULL!	#NULL!	#NULL!	#NULL!	#NULL!	2		2	#NULL!	#NULL!	#NULL!	2	1	4	2	0	1	3	2	0	#NULL!	#NULL!	0	#NULL!	#NULL!	60	4	2	1	1	11	1	2	0	#NULL!	0	1	0	1	#NULL!	#NULL!
1255	#NULL!	2	#NULL!	#NULL!	#NULL!	#NULL!	#NULL!	#NULL!	#NULL!	#NULL!	2		2	#NULL!	#NULL!	#NULL!	2	1	4	2	0	1	3	2	0	#NULL!	#NULL!	0	#NULL!	#NULL!	60	4	2	1	1	11	1	2	0	#NULL!	0	1	0	1	#NULL!	#NULL!
1256	#NULL!	2	#NULL!	#NULL!	#NULL!	#NULL!	#NULL!	#NULL!	#NULL!	#NULL!	1		2	#NULL!	#NULL!	#NULL!	2	2	2	1	2	2	3	2	0	#NULL!	#NULL!	#NULL!	#NULL!	#NULL!	62	4	2	1	1	29	1	0	2	#NULL!	0	1	0	1	#NULL!	#NULL!
1257	#NULL!	2	#NULL!	#NULL!	#NULL!	#NULL!	#NULL!	#NULL!	#NULL!	#NULL!	2		1	#NULL!	#NULL!	#NULL!	2	1	4	2	0	1	3	2	0	#NULL!	#NULL!	0	#NULL!	#NULL!	60	4	2	1	1	32.2	1	3	1	#NULL!	0	1	1	2	#NULL!	#NULL!
1258	#NULL!	2	#NULL!	#NULL!	#NULL!	#NULL!	#NULL!	#NULL!	#NULL!	#NULL!	1		1	#NULL!	#NULL!	#NULL!	2	1	4	2	0	1	3	2	0	#NULL!	#NULL!	0	#NULL!	#NULL!	64	5	3	1	2	31	1	2	0	#NULL!	0	1	0	1	#NULL!	#NULL!
1259	#NULL!	2	#NULL!	#NULL!	#NULL!	#NULL!	#NULL!	#NULL!	#NULL!	#NULL!	1		2	#NULL!	#NULL!	#NULL!	2	1	2	1	1	2	2	#NULL!	1	#NULL!	#NULL!	1	1	#NULL!	60	4	2	1	1	8	1	2	1	#NULL!	0	1	1	1	#NULL!	#NULL!
1260	#NULL!	2	#NULL!	#NULL!	#NULL!	#NULL!	#NULL!	#NULL!	#NULL!	#NULL!	1		1	#NULL!	#NULL!	#NULL!	2	1	2	1	1	2	2	#NULL!	1	#NULL!	#NULL!	6	2	#NULL!	60	4	2	1	1	28.7	1	1	1	#NULL!	0	0	1	1	#NULL!	#NULL!
1261	#NULL!	2	#NULL!	#NULL!	#NULL!	#NULL!	#NULL!	#NULL!	#NULL!	#NULL!	1		2	#NULL!	#NULL!	#NULL!	2	2	2	1	1	2	2	#NULL!	1	#NULL!	#NULL!	5	2	#NULL!	60	4	2	1	1	26.5	1	0	0	#NULL!	0	0	1	1	#NULL!	#NULL!
1262	#NULL!	1	#NULL!	#NULL!	#NULL!	#NULL!	#NULL!	#NULL!	#NULL!	#NULL!	2		1	#NULL!	#NULL!	#NULL!	2	1	2	1	1	2	2	#NULL!	1	#NULL!	#NULL!	2	1	#NULL!	60	4	2	1	1	12	1	0	0	#NULL!	0	1	0	2	#NULL!	#NULL!
1263	#NULL!	2	#NULL!	#NULL!	#NULL!	#NULL!	#NULL!	#NULL!	#NULL!	#NULL!	2		2	#NULL!	#NULL!	#NULL!	2	1	2	1	1	2	2	#NULL!	0	#NULL!	#NULL!	0	#NULL!	#NULL!	60	4	2	1	1	109	1	4	1	#NULL!	0	#NULL!	#NULL!	1	0	#NULL!
1264	#NULL!	2	#NULL!	#NULL!	#NULL!	#NULL!	#NULL!	#NULL!	#NULL!	#NULL!	1		1	#NULL!	#NULL!	#NULL!	2	1	2	1	1	2	2	#NULL!	0	#NULL!	#NULL!	#NULL!	#NULL!	#NULL!	64	5	3	1	2	30	1	2	0	#NULL!	1	1	0	1	#NULL!	#NULL!
1265	#NULL!	2	#NULL!	#NULL!	#NULL!	#NULL!	#NULL!	#NULL!	#NULL!	#NULL!	1		2	#NULL!	#NULL!	#NULL!	2	1	2	1	1	2	2	#NULL!	0	#NULL!	#NULL!	#NULL!	#NULL!	#NULL!	60	4	2	1	1	57.2	1	1	1	#NULL!	0	0	0	1	0	#NULL!
1266	#NULL!	2	#NULL!	#NULL!	#NULL!	#NULL!	#NULL!	#NULL!	#NULL!	#NULL!	1		1	#NULL!	#NULL!	#NULL!	2	1	2	2	1	2	2	#NULL!	1	0	#NULL!	4	1	#NULL!	56	3	1	0	#NULL!	24	1	0	0	#NULL!	0	0	0	1	0	#NULL!
1267	#NULL!	2	#NULL!	#NULL!	#NULL!	#NULL!	#NULL!	#NULL!	#NULL!	#NULL!	1		1	#NULL!	#NULL!	#NULL!	2	1	3	2	0	1	2	#NULL!	1	1	#NULL!	2	1	#NULL!	66	5	3	1	2	8.5	1	0	0	#NULL!	0	1	0	1	#NULL!	#NULL!
1268	#NULL!	2	#NULL!	#NULL!	#NULL!	#NULL!	#NULL!	#NULL!	#NULL!	#NULL!	1		1	#NULL!	#NULL!	#NULL!	2	1	3	2	0	1	2	#NULL!	0	#NULL!	#NULL!	0	#NULL!	#NULL!	60	4	2	1	1	19	1	2	1	#NULL!	0	#NULL!	#NULL!	1	#NULL!	#NULL!
1269	#NULL!	2	#NULL!	#NULL!	#NULL!	#NULL!	#NULL!	#NULL!	#NULL!	#NULL!	2		1	#NULL!	#NULL!	#NULL!	2	1	3	2	0	1	2	#NULL!	0	#NULL!	#NULL!	0	#NULL!	#NULL!	70	5	3	1	2	31	1	0	0	#NULL!	2	0	0	1	0	#NULL!
1270	#NULL!	2	#NULL!	#NULL!	#NULL!	#NULL!	#NULL!	#NULL!	#NULL!	#NULL!	2		1	#NULL!	#NULL!	#NULL!	2	1	2	1	0	1	1	#NULL!	0	#NULL!	#NULL!	0	#NULL!	#NULL!	66	5	3	1	2	46.2	1	0	0	#NULL!	0	0	0	1	0	#NULL!
1271	#NULL!	2	#NULL!	#NULL!	#NULL!	#NULL!	#NULL!	#NULL!	#NULL!	#NULL!	1		2	#NULL!	#NULL!	#NULL!	2	1	2	1	0	1	1	#NULL!	0	1	#NULL!	0	#NULL!	#NULL!	54	2	1	0	#NULL!	21	1	0	0	#NULL!	0	0	0	1	0	#NULL!
1272	#NULL!	2	2	#NULL!	#NULL!	#NULL!	#NULL!	#NULL!	#NULL!	#NULL!	2		2	#NULL!	#NULL!	#NULL!	2	1	2	1	0	1	1	#NULL!	0	#NULL!	#NULL!	0	#NULL!	#NULL!	62	4	2	1	1	33.3	1	0	0	#NULL!	1	1	0	1	#NULL!	#NULL!
1273	#NULL!	2	2	#NULL!	#NULL!	#NULL!	#NULL!	#NULL!	#NULL!	#NULL!	2		2	#NULL!	#NULL!	#NULL!	2	1	2	1	2	2	3	2	1	#NULL!	#NULL!	3	1	#NULL!	70	5	3	1	2	14.6	1	0	0	#NULL!	1	1	1	1	#NULL!	#NULL!
1274	#NULL!	2	#NULL!	#NULL!	#NULL!	#NULL!	#NULL!	#NULL!	#NULL!	#NULL!	1		2	#NULL!	#NULL!	#NULL!	2	2	2	1	2	2	3	2	0	#NULL!	#NULL!	0	#NULL!	#NULL!	66	5	3	1	2	44	1	1	1	#NULL!	1	0	0	1	0	#NULL!
1275	#NULL!	2	#NULL!	#NULL!	#NULL!	#NULL!	#NULL!	#NULL!	#NULL!	#NULL!	2		2	#NULL!	#NULL!	#NULL!	2	2	2	1	2	2	3	2	0	#NULL!	#NULL!	#NULL!	#NULL!	#NULL!	62	4	2	1	1	25	1	2	0	#NULL!	0	1	0	1	#NULL!	#NULL!
1276	#NULL!	2	#NULL!	#NULL!	#NULL!	#NULL!	#NULL!	#NULL!	#NULL!	#NULL!	2		1	#NULL!	#NULL!	#NULL!	2	1	2	1	2	2	3	2	1	#NULL!	#NULL!	2	1	#NULL!	60	4	2	1	1	14.5	1	1	0	#NULL!	0	1	0	1	#NULL!	#NULL!
1277	#NULL!	2	#NULL!	#NULL!	#NULL!	#NULL!	#NULL!	#NULL!	#NULL!	#NULL!	1		1	#NULL!	#NULL!	#NULL!	2	1	2	1	2	2	3	2	0	#NULL!	#NULL!	0	#NULL!	#NULL!	60	4	2	1	1	14	1	1	0	#NULL!	0	1	1	1	#NULL!	#NULL!
1278	#NULL!	2	#NULL!	#NULL!	#NULL!	#NULL!	#NULL!	#NULL!	#NULL!	#NULL!	1		1	#NULL!	#NULL!	#NULL!	2	1	2	1	0	1	3	2	0	0	#NULL!	0	#NULL!	#NULL!	48.6	1	1	0	#NULL!	47.3	1	0	2	#NULL!	2	0	0	1	0	#NULL!
1279	#NULL!	2	#NULL!	#NULL!	#NULL!	#NULL!	#NULL!	#NULL!	#NULL!	#NULL!	1		1	#NULL!	#NULL!	#NULL!	2	1	2	1	2	2	3	2	1	#NULL!	#NULL!	1	1	#NULL!	60	4	2	1	1	8	1	2	0	#NULL!	0	0	0	2	0	#NULL!
1280	#NULL!	2	2	#NULL!	#NULL!	#NULL!	#NULL!	#NULL!	#NULL!	#NULL!	1		2	#NULL!	#NULL!	#NULL!	2	1	4	2	2	2	3	2	1	#NULL!	#NULL!	5	2	#NULL!	62	4	2	1	1	12	1	2	1	#NULL!	0	1	0	1	#NULL!	#NULL!
1281	#NULL!	2	#NULL!	#NULL!	#NULL!	#NULL!	#NULL!	#NULL!	#NULL!	#NULL!	1		1	#NULL!	#NULL!	#NULL!	2	1	4	2	2	2	3	2	0	0	#NULL!	0	#NULL!	#NULL!	56	3	1	0	#NULL!	10	1	1	0	#NULL!	1	1	1	1	#NULL!	#NULL!
1282	#NULL!	2	#NULL!	#NULL!	#NULL!	#NULL!	#NULL!	#NULL!	#NULL!	#NULL!	1		2	#NULL!	#NULL!	#NULL!	2	1	4	2	1	2	3	2	0	#NULL!	#NULL!	#NULL!	#NULL!	#NULL!	60	4	2	1	1	75.8	1	2	0	#NULL!	2	0	0	1	0	#NULL!
1283	#NULL!	2	#NULL!	#NULL!	#NULL!	#NULL!	#NULL!	#NULL!	#NULL!	#NULL!	2		2	#NULL!	#NULL!	#NULL!	2	1	3	2	2	2	3	2	0	#NULL!	#NULL!	0	#NULL!	#NULL!	60	4	2	1	1	19	1	1	0	#NULL!	3	1	0	1	#NULL!	#NULL!
1284	#NULL!	2	#NULL!	#NULL!	#NULL!	#NULL!	#NULL!	#NULL!	#NULL!	#NULL!	2		2	#NULL!	#NULL!	#NULL!	2	1	4	2	1	2	3	2	0	#NULL!	#NULL!	0	#NULL!	#NULL!	60	4	2	1	1	15	1	1	1	#NULL!	1	0	0	1	0	#NULL!
1285	#NULL!	2	#NULL!	#NULL!	#NULL!	#NULL!	#NULL!	#NULL!	#NULL!	#NULL!	1		2	#NULL!	#NULL!	#NULL!	2	1	4	2	1	2	3	2	0	#NULL!	#NULL!	0	#NULL!	#NULL!	60	4	2	1	1	3	1	2	2	#NULL!	3	0	0	1	0	#NULL!
1286	#NULL!	2	#NULL!	#NULL!	#NULL!	#NULL!	#NULL!	#NULL!	#NULL!	#NULL!	2		2	#NULL!	#NULL!	#NULL!	2	1	4	2	0	1	3	2	0	#NULL!	#NULL!	0	#NULL!	#NULL!	66	5	3	1	2	88	1	0	2	#NULL!	0	0	0	1	0	#NULL!
1287	#NULL!	2	#NULL!	#NULL!	#NULL!	#NULL!	#NULL!	#NULL!	#NULL!	#NULL!	2		2	#NULL!	#NULL!	#NULL!	2	1	4	2	0	1	3	2	0	#NULL!	#NULL!	0	#NULL!	#NULL!	60	4	2	1	1	50.3	1	0	1	#NULL!	2	1	0	1	#NULL!	#NULL!
1288	#NULL!	2	#NULL!	#NULL!	#NULL!	#NULL!	#NULL!	#NULL!	#NULL!	#NULL!	2		1	#NULL!	#NULL!	#NULL!	2	1	4	2	0	1	3	2	1	#NULL!	#NULL!	2	1	#NULL!	60	4	2	1	1	33	1	2	1	#NULL!	0	#NULL!	#NULL!	1	0	#NULL!
1289	#NULL!	2	#NULL!	#NULL!	#NULL!	#NULL!	#NULL!	#NULL!	#NULL!	#NULL!	1		2	#NULL!	#NULL!	#NULL!	2	1	4	2	0	1	3	2	0	#NULL!	#NULL!	#NULL!	#NULL!	#NULL!	66	5	3	1	2	16.4	1	1	0	#NULL!	2	1	0	1	#NULL!	#NULL!
1290	#NULL!	2	#NULL!	#NULL!	#NULL!	#NULL!	#NULL!	#NULL!	#NULL!	#NULL!	2		2	#NULL!	#NULL!	#NULL!	2	1	4	2	1	2	3	2	0	#NULL!	#NULL!	0	#NULL!	#NULL!	60	4	2	1	1	13	1	2	1	#NULL!	0	1	0	1	#NULL!	#NULL!
1291	#NULL!	2	#NULL!	#NULL!	#NULL!	#NULL!	#NULL!	#NULL!	#NULL!	#NULL!	1		2	#NULL!	#NULL!	#NULL!	2	1	4	2	1	2	3	2	0	#NULL!	#NULL!	0	#NULL!	#NULL!	60	4	2	1	1	8	1	0	2	#NULL!	0	0	1	1	#NULL!	#NULL!
1292	#NULL!	2	#NULL!	#NULL!	#NULL!	#NULL!	#NULL!	#NULL!	#NULL!	#NULL!	1		2	#NULL!	#NULL!	#NULL!	2	1	4	2	1	2	3	2	1	#NULL!	#NULL!	1	1	#NULL!	60	4	2	1	1	18	1	0	2	#NULL!	1	1	0	1	#NULL!	#NULL!
1293	#NULL!	2	#NULL!	#NULL!	#NULL!	#NULL!	#NULL!	#NULL!	#NULL!	#NULL!	2		2	#NULL!	#NULL!	#NULL!	2	1	4	2	1	2	3	2	0	#NULL!	#NULL!	0	#NULL!	#NULL!	66	5	3	1	2	4.5	1	1	0	#NULL!	0	0	0	1	0	#NULL!
1294	#NULL!	2	#NULL!	#NULL!	#NULL!	#NULL!	#NULL!	#NULL!	#NULL!	#NULL!	1		1	#NULL!	#NULL!	#NULL!	2	1	4	2	1	2	3	2	1	#NULL!	#NULL!	1	1	#NULL!	60.85	4	2	1	1	7	1	0	0	#NULL!	0	0	1	1	#NULL!	#NULL!
1295	#NULL!	1	#NULL!	#NULL!	#NULL!	#NULL!	#NULL!	#NULL!	#NULL!	#NULL!	1		1	1	#NULL!	#NULL!	2	1	1	1	1	2	3	2	0	0	#NULL!	0	#NULL!	#NULL!	30	1	1	0	#NULL!	7.5	1	0	0	#NULL!	1	1	1	1	#NULL!	#NULL!
1296	#NULL!	2	#NULL!	#NULL!	#NULL!	#NULL!	#NULL!	#NULL!	#NULL!	#NULL!	2		2	#NULL!	#NULL!	#NULL!	2	1	4	2	0	1	3	2	0	#NULL!	#NULL!	#NULL!	#NULL!	#NULL!	60	4	2	1	1	17	1	2	1	#NULL!	0	1	0	1	#NULL!	#NULL!
1297	#NULL!	2	#NULL!	#NULL!	#NULL!	#NULL!	#NULL!	#NULL!	#NULL!	#NULL!	2		2	#NULL!	#NULL!	#NULL!	2	1	4	2	0	1	3	2	0	#NULL!	#NULL!	0	#NULL!	#NULL!	60	4	2	1	1	42.5	1	0	2	#NULL!	0	0	1	1	#NULL!	#NULL!
1298	#NULL!	2	#NULL!	#NULL!	#NULL!	#NULL!	#NULL!	#NULL!	#NULL!	#NULL!	1		1	#NULL!	#NULL!	#NULL!	2	1	4	2	0	1	3	2	1	#NULL!	#NULL!	1	1	#NULL!	60	4	2	1	1	26	1	1	0	#NULL!	0	1	0	1	#NULL!	#NULL!
1299	#NULL!	2	#NULL!	#NULL!	#NULL!	#NULL!	#NULL!	#NULL!	#NULL!	#NULL!	1		1	#NULL!	#NULL!	#NULL!	2	1	4	2	0	1	3	2	0	#NULL!	#NULL!	0	#NULL!	#NULL!	60	4	2	1	1	19	1	0	1	#NULL!	0	0	1	1	#NULL!	#NULL!
1300	#NULL!	2	#NULL!	#NULL!	#NULL!	#NULL!	#NULL!	#NULL!	#NULL!	#NULL!	2		2	#NULL!	#NULL!	#NULL!	2	1	2	1	1	2	2	#NULL!	0	#NULL!	#NULL!	0	#NULL!	#NULL!	60	4	2	1	1	30.9	1	0	0	#NULL!	1	#NULL!	1	2	#NULL!	#NULL!
1301	#NULL!	2	#NULL!	#NULL!	#NULL!	#NULL!	#NULL!	#NULL!	#NULL!	#NULL!	2		1	#NULL!	#NULL!	#NULL!	2	1	2	1	1	2	2	#NULL!	0	#NULL!	#NULL!	0	#NULL!	#NULL!	60	4	2	1	1	31	1	1	0	#NULL!	1	0	0	1	0	#NULL!
1302	#NULL!	2	#NULL!	#NULL!	#NULL!	#NULL!	#NULL!	#NULL!	#NULL!	#NULL!	2		2	#NULL!	#NULL!	#NULL!	2	1	2	2	1	2	2	#NULL!	0	0	#NULL!	0	#NULL!	#NULL!	50	1	1	0	#NULL!	12	1	3	2	#NULL!	1	0	1	1	#NULL!	#NULL!
1303	#NULL!	2	#NULL!	#NULL!	#NULL!	#NULL!	#NULL!	#NULL!	#NULL!	#NULL!	1		2	#NULL!	#NULL!	#NULL!	2	1	3	2	1	2	2	#NULL!	0	#NULL!	#NULL!	#NULL!	#NULL!	#NULL!	64	5	3	1	2	23	1	1	0	#NULL!	2	1	0	1	#NULL!	#NULL!
1304	#NULL!	2	#NULL!	#NULL!	#NULL!	#NULL!	#NULL!	#NULL!	#NULL!	#NULL!	1		2	#NULL!	#NULL!	#NULL!	2	1	3	2	1	2	2	#NULL!	0	#NULL!	#NULL!	0	#NULL!	#NULL!	60	4	2	1	1	60	1	0	0	#NULL!	2	0	0	1	0	#NULL!
1305	#NULL!	2	#NULL!	#NULL!	#NULL!	#NULL!	#NULL!	#NULL!	#NULL!	#NULL!	1		1	#NULL!	#NULL!	#NULL!	2	1	2	1	1	2	2	#NULL!	1	#NULL!	#NULL!	1	1	#NULL!	64	5	3	1	2	18	1	1	2	#NULL!	0	1	0	1	#NULL!	#NULL!
1306	#NULL!	2	#NULL!	#NULL!	#NULL!	#NULL!	#NULL!	#NULL!	#NULL!	#NULL!	2		1	#NULL!	#NULL!	#NULL!	2	1	2	1	1	2	2	#NULL!	0	#NULL!	#NULL!	0	#NULL!	#NULL!	60	4	2	1	1	9	1	2	0	#NULL!	0	0	0	1	0	#NULL!
1307	#NULL!	1	#NULL!	#NULL!	#NULL!	#NULL!	#NULL!	#NULL!	#NULL!	#NULL!	1		1	#NULL!	#NULL!	#NULL!	2	1	2	1	1	2	2	#NULL!	0	#NULL!	#NULL!	0	#NULL!	#NULL!	66	5	3	1	2	26	1	0	0	#NULL!	1	0	1	1	#NULL!	#NULL!
1308	#NULL!	2	#NULL!	#NULL!	#NULL!	#NULL!	#NULL!	#NULL!	#NULL!	#NULL!	2		2	#NULL!	#NULL!	#NULL!	2	1	3	2	1	2	2	#NULL!	0	#NULL!	#NULL!	0	#NULL!	#NULL!	62	4	2	1	1	34.5	1	0	1	#NULL!	3	#NULL!	#NULL!	2	#NULL!	#NULL!
1309	#NULL!	1	#NULL!	#NULL!	#NULL!	#NULL!	#NULL!	#NULL!	#NULL!	#NULL!	2		1	#NULL!	#NULL!	#NULL!	2	1	2	1	1	2	2	#NULL!	0	#NULL!	#NULL!	0	#NULL!	#NULL!	60	4	2	1	1	6	1	0	3	#NULL!	0	0	1	1	#NULL!	#NULL!
1310	#NULL!	2	#NULL!	#NULL!	#NULL!	#NULL!	#NULL!	#NULL!	#NULL!	#NULL!	1		2	#NULL!	#NULL!	#NULL!	2	1	3	2	0	1	2	#NULL!	1	#NULL!	#NULL!	1	1	#NULL!	60	4	2	1	1	57	1	0	0	#NULL!	0	0	0	1	0	#NULL!
1311	#NULL!	2	#NULL!	#NULL!	#NULL!	#NULL!	#NULL!	#NULL!	#NULL!	#NULL!	1		1	#NULL!	#NULL!	#NULL!	2	2	3	2	0	1	2	#NULL!	1	#NULL!	#NULL!	2	1	#NULL!	66	5	3	1	2	6	1	1	0	#NULL!	2	1	0	1	#NULL!	#NULL!
1312	#NULL!	2	#NULL!	#NULL!	#NULL!	#NULL!	#NULL!	#NULL!	#NULL!	#NULL!	1		1	#NULL!	#NULL!	#NULL!	2	2	3	2	0	1	2	#NULL!	0	#NULL!	#NULL!	0	#NULL!	#NULL!	70	5	3	1	2	30	1	2	0	#NULL!	3	0	0	2	0	#NULL!
1313	#NULL!	2	2	#NULL!	#NULL!	#NULL!	#NULL!	#NULL!	#NULL!	#NULL!	1		1	1	#NULL!	#NULL!	2	1	3	2	1	2	2	#NULL!	1	0	#NULL!	2	1	#NULL!	56	3	1	0	#NULL!	8	1	1	0	#NULL!	0	1	1	1	#NULL!	#NULL!
1314	#NULL!	1	#NULL!	#NULL!	#NULL!	#NULL!	#NULL!	#NULL!	#NULL!	#NULL!	1		2	#NULL!	#NULL!	#NULL!	2	1	3	2	1	2	2	#NULL!	1	#NULL!	#NULL!	4	1	#NULL!	61.6	4	2	1	1	11	1	1	0	#NULL!	1	0	1	1	#NULL!	#NULL!
1315	#NULL!	1	#NULL!	#NULL!	#NULL!	#NULL!	#NULL!	#NULL!	#NULL!	#NULL!	1		2	#NULL!	#NULL!	#NULL!	2	1	3	2	1	2	2	#NULL!	0	#NULL!	#NULL!	#NULL!	#NULL!	#NULL!	64.4	5	3	1	2	14	1	1	0	#NULL!	2	1	0	1	#NULL!	#NULL!
1316	#NULL!	2	#NULL!	#NULL!	#NULL!	#NULL!	#NULL!	#NULL!	#NULL!	#NULL!	1		2	#NULL!	#NULL!	#NULL!	2	1	3	2	1	2	2	#NULL!	1	#NULL!	#NULL!	2	1	#NULL!	68.4	5	3	1	2	17	1	3	1	#NULL!	4	0	1	1	#NULL!	#NULL!
1317	#NULL!	2	#NULL!	#NULL!	#NULL!	#NULL!	#NULL!	#NULL!	#NULL!	#NULL!	1		2	#NULL!	#NULL!	#NULL!	2	2	3	2	1	2	2	#NULL!	0	#NULL!	#NULL!	0	#NULL!	#NULL!	64	5	3	1	2	14	1	1	0	#NULL!	0	1	0	1	#NULL!	#NULL!
1318	#NULL!	2	#NULL!	#NULL!	#NULL!	#NULL!	#NULL!	#NULL!	#NULL!	#NULL!	1		2	#NULL!	#NULL!	#NULL!	2	1	3	2	1	2	2	#NULL!	0	#NULL!	#NULL!	0	#NULL!	#NULL!	64	5	3	1	2	14	1	1	0	#NULL!	0	1	1	1	#NULL!	#NULL!
1319	#NULL!	2	#NULL!	#NULL!	#NULL!	#NULL!	#NULL!	#NULL!	#NULL!	#NULL!	1		2	#NULL!	#NULL!	#NULL!	2	1	3	2	0	1	2	#NULL!	0	1	#NULL!	0	#NULL!	#NULL!	50	1	1	0	#NULL!	36	1	0	1	#NULL!	0	0	0	1	#NULL!	#NULL!
1320	#NULL!	2	#NULL!	#NULL!	#NULL!	#NULL!	#NULL!	#NULL!	#NULL!	#NULL!	1		2	#NULL!	#NULL!	#NULL!	2	1	3	2	0	1	2	#NULL!	0	#NULL!	#NULL!	0	#NULL!	#NULL!	60	4	2	1	1	45	1	2	2	#NULL!	0	0	0	1	0	#NULL!
1321	#NULL!	1	#NULL!	#NULL!	#NULL!	#NULL!	#NULL!	#NULL!	#NULL!	#NULL!	1		1	#NULL!	#NULL!	#NULL!	2	1	3	2	0	1	2	#NULL!	1	#NULL!	#NULL!	2	1	#NULL!	66	5	3	1	2	15.5	1	2	1	#NULL!	1	1	0	1	#NULL!	#NULL!
1322	#NULL!	2	#NULL!	#NULL!	#NULL!	#NULL!	#NULL!	#NULL!	#NULL!	#NULL!	1		1	#NULL!	#NULL!	#NULL!	2	1	2	1	2	2	3	2	1	#NULL!	#NULL!	4	1	#NULL!	60	4	2	1	1	3.3	1	2	4	#NULL!	2	0	1	1	#NULL!	#NULL!
1323	#NULL!	1	#NULL!	#NULL!	#NULL!	#NULL!	#NULL!	#NULL!	#NULL!	#NULL!	1		2	1	#NULL!	#NULL!	2	1	4	2	2	2	3	2	0	0	#NULL!	#NULL!	#NULL!	#NULL!	56	3	1	0	#NULL!	4	1	0	0	#NULL!	1	0	0	1	0	#NULL!
1324	#NULL!	1	#NULL!	#NULL!	#NULL!	#NULL!	#NULL!	#NULL!	#NULL!	#NULL!	1		2	#NULL!	#NULL!	#NULL!	2	2	4	2	2	2	3	2	1	#NULL!	#NULL!	2	1	#NULL!	64	5	3	1	2	11	1	1	0	#NULL!	0	1	0	1	#NULL!	#NULL!
1325	#NULL!	2	#NULL!	#NULL!	#NULL!	#NULL!	#NULL!	#NULL!	#NULL!	#NULL!	2		2	#NULL!	#NULL!	#NULL!	2	1	4	2	1	2	3	2	1	#NULL!	#NULL!	1	1	#NULL!	60	4	2	1	1	13	1	2	0	#NULL!	1	1	0	1	#NULL!	#NULL!
1326	#NULL!	2	#NULL!	#NULL!	#NULL!	#NULL!	#NULL!	#NULL!	#NULL!	#NULL!	2		2	#NULL!	#NULL!	#NULL!	2	1	4	2	1	2	3	2	0	0	#NULL!	0	#NULL!	#NULL!	56	3	1	0	#NULL!	13	1	2	0	#NULL!	0	1	0	1	#NULL!	#NULL!
1327	#NULL!	2	#NULL!	#NULL!	#NULL!	#NULL!	#NULL!	#NULL!	#NULL!	#NULL!	1		2	#NULL!	#NULL!	#NULL!	2	1	4	2	1	2	3	2	0	#NULL!	#NULL!	#NULL!	#NULL!	#NULL!	64	5	3	1	2	5	1	1	0	#NULL!	0	1	0	1	#NULL!	#NULL!
1328	#NULL!	2	#NULL!	#NULL!	#NULL!	#NULL!	#NULL!	#NULL!	#NULL!	#NULL!	1		2	#NULL!	#NULL!	#NULL!	2	1	2	1	2	2	3	2	1	#NULL!	#NULL!	3	1	#NULL!	61.5	4	2	1	1	6	1	1	1	#NULL!	2	1	1	1	#NULL!	#NULL!
1329	#NULL!	2	#NULL!	#NULL!	#NULL!	#NULL!	#NULL!	#NULL!	#NULL!	#NULL!	1		1	#NULL!	#NULL!	#NULL!	2	1	4	2	2	2	3	2	1	0	#NULL!	6	2	#NULL!	56	3	1	0	#NULL!	9	1	0	0	#NULL!	0	1	0	1	#NULL!	#NULL!
1330	#NULL!	2	#NULL!	#NULL!	#NULL!	#NULL!	#NULL!	#NULL!	#NULL!	#NULL!	1		2	#NULL!	#NULL!	#NULL!	2	1	4	2	1	2	3	2	0	0	#NULL!	#NULL!	#NULL!	#NULL!	56	3	1	0	#NULL!	10.2	1	0	0	#NULL!	2	1	0	1	#NULL!	#NULL!
1331	#NULL!	1	#NULL!	#NULL!	#NULL!	#NULL!	#NULL!	#NULL!	#NULL!	#NULL!	1		2	#NULL!	#NULL!	#NULL!	2	1	4	2	1	2	3	2	1	#NULL!	#NULL!	4	1	#NULL!	61.8	4	2	1	1	13	1	0	0	#NULL!	0	1	0	1	#NULL!	#NULL!
1332	#NULL!	1	#NULL!	#NULL!	#NULL!	#NULL!	#NULL!	#NULL!	#NULL!	#NULL!	1		2	#NULL!	#NULL!	#NULL!	2	1	4	2	1	2	3	2	1	#NULL!	#NULL!	4	1	#NULL!	62	4	2	1	1	13	1	0	0	#NULL!	0	#NULL!	#NULL!	2	#NULL!	#NULL!
1333	#NULL!	2	#NULL!	#NULL!	#NULL!	#NULL!	#NULL!	#NULL!	#NULL!	#NULL!	1		2	#NULL!	#NULL!	#NULL!	2	2	4	2	1	2	3	2	1	#NULL!	#NULL!	1	1	#NULL!	60	4	2	1	1	18	1	0	0	#NULL!	2	1	1	1	#NULL!	#NULL!
1334	#NULL!	2	#NULL!	#NULL!	#NULL!	#NULL!	#NULL!	#NULL!	#NULL!	#NULL!	1		2	#NULL!	#NULL!	#NULL!	2	1	4	2	1	2	3	2	0	#NULL!	#NULL!	#NULL!	#NULL!	#NULL!	64	5	3	1	2	5	1	1	0	#NULL!	0	1	0	1	#NULL!	#NULL!
1335	#NULL!	2	#NULL!	#NULL!	#NULL!	#NULL!	#NULL!	#NULL!	#NULL!	#NULL!	1		2	#NULL!	#NULL!	#NULL!	2	1	4	2	1	2	3	2	1	1	#NULL!	4	1	#NULL!	54	2	1	0	#NULL!	21	1	1	0	#NULL!	0	0	1	1	#NULL!	#NULL!
1336	#NULL!	2	#NULL!	#NULL!	#NULL!	#NULL!	#NULL!	#NULL!	#NULL!	#NULL!	1		2	#NULL!	#NULL!	#NULL!	2	2	4	2	2	2	3	2	1	#NULL!	#NULL!	2	1	#NULL!	60	4	2	1	1	22	1	1	5	#NULL!	0	0	0	1	0	#NULL!
1337	#NULL!	2	#NULL!	#NULL!	#NULL!	#NULL!	#NULL!	#NULL!	#NULL!	#NULL!	2		1	#NULL!	#NULL!	#NULL!	2	1	4	2	2	2	3	2	1	#NULL!	#NULL!	3	1	#NULL!	64	5	3	1	2	41	1	2	0	#NULL!	0	0	0	1	0	#NULL!
1338	#NULL!	2	#NULL!	#NULL!	#NULL!	#NULL!	#NULL!	#NULL!	#NULL!	#NULL!	1		1	#NULL!	#NULL!	#NULL!	2	1	4	2	1	2	3	2	0	#NULL!	#NULL!	#NULL!	#NULL!	#NULL!	64	5	3	1	2	12	1	2	0	#NULL!	2	0	1	1	#NULL!	#NULL!
1339	#NULL!	2	#NULL!	#NULL!	#NULL!	#NULL!	#NULL!	#NULL!	#NULL!	#NULL!	2		2	#NULL!	#NULL!	#NULL!	2	1	4	2	1	2	3	2	1	#NULL!	#NULL!	1	1	#NULL!	62	4	2	1	1	15	1	1	0	#NULL!	0	1	1	1	#NULL!	#NULL!
1340	#NULL!	2	2	#NULL!	#NULL!	#NULL!	#NULL!	#NULL!	#NULL!	#NULL!	2		1	#NULL!	#NULL!	#NULL!	2	1	4	2	1	2	3	2	1	#NULL!	#NULL!	4	1	#NULL!	60	4	2	1	1	41	0	1	0	#NULL!	1	#NULL!	#NULL!	1	#NULL!	#NULL!
1341	#NULL!	2	#NULL!	#NULL!	#NULL!	#NULL!	#NULL!	#NULL!	#NULL!	#NULL!	2		1	#NULL!	#NULL!	#NULL!	2	1	4	2	2	2	3	2	0	#NULL!	#NULL!	#NULL!	#NULL!	#NULL!	64	5	3	1	2	3	1	1	0	#NULL!	1	0	0	1	0	#NULL!
1342	#NULL!	2	#NULL!	#NULL!	#NULL!	#NULL!	22	1	5	#NULL!	1		2	1	#NULL!	#NULL!	2	1	4	2	2	2	3	2	0	0	#NULL!	0	#NULL!	#NULL!	56	3	1	0	#NULL!	5	1	0	0	#NULL!	1	1	1	1	#NULL!	#NULL!
1343	#NULL!	1	#NULL!	#NULL!	#NULL!	#NULL!	#NULL!	#NULL!	#NULL!	#NULL!	2		1	#NULL!	#NULL!	#NULL!	2	1	4	2	2	2	3	2	1	#NULL!	#NULL!	1	1	#NULL!	64	5	3	1	2	16.2	1	2	0	#NULL!	0	1	0	1	#NULL!	#NULL!
1344	#NULL!	2	#NULL!	#NULL!	#NULL!	#NULL!	#NULL!	#NULL!	#NULL!	#NULL!	2		1	#NULL!	#NULL!	#NULL!	2	1	4	2	2	2	3	2	1	#NULL!	#NULL!	1	1	#NULL!	64	5	3	1	2	16.2	1	2	0	#NULL!	0	1	0	1	#NULL!	#NULL!
1345	#NULL!	1	#NULL!	#NULL!	#NULL!	#NULL!	#NULL!	#NULL!	#NULL!	#NULL!	1		2	#NULL!	#NULL!	#NULL!	2	1	4	2	2	2	3	2	0	#NULL!	#NULL!	0	#NULL!	#NULL!	60.4	4	2	1	1	11	1	1	0	#NULL!	0	1	1	1	#NULL!	#NULL!
1346	#NULL!	2	#NULL!	#NULL!	#NULL!	#NULL!	#NULL!	#NULL!	#NULL!	#NULL!	1		2	#NULL!	#NULL!	#NULL!	2	1	4	2	1	2	3	2	0	#NULL!	#NULL!	#NULL!	#NULL!	#NULL!	64	5	3	1	2	20	1	1	0	#NULL!	1	0	0	1	0	#NULL!
1347	#NULL!	2	#NULL!	#NULL!	#NULL!	#NULL!	#NULL!	#NULL!	#NULL!	#NULL!	2		1	#NULL!	#NULL!	#NULL!	2	1	4	2	1	2	3	2	0	#NULL!	#NULL!	#NULL!	#NULL!	#NULL!	64	5	3	1	2	11	1	1	0	#NULL!	1	1	0	1	#NULL!	#NULL!
1348	#NULL!	2	#NULL!	#NULL!	#NULL!	#NULL!	#NULL!	#NULL!	#NULL!	#NULL!	1		2	#NULL!	#NULL!	#NULL!	2	1	4	2	1	2	3	2	0	#NULL!	#NULL!	#NULL!	#NULL!	#NULL!	63	4	3	1	2	42	1	2	1	#NULL!	3	0	0	1	0	#NULL!
1349	#NULL!	2	2	#NULL!	#NULL!	#NULL!	#NULL!	#NULL!	#NULL!	#NULL!	2		2	#NULL!	#NULL!	#NULL!	2	1	4	2	0	1	3	2	0	#NULL!	#NULL!	0	#NULL!	#NULL!	62	4	2	1	1	32.4	1	1	0	#NULL!	1	0	1	1	#NULL!	#NULL!
1350	#NULL!	2	#NULL!	#NULL!	#NULL!	#NULL!	#NULL!	#NULL!	#NULL!	#NULL!	2		2	#NULL!	#NULL!	#NULL!	2	1	4	2	0	1	3	2	0	#NULL!	#NULL!	#NULL!	#NULL!	#NULL!	60	4	2	1	1	17	1	1	0	#NULL!	0	0	1	1	#NULL!	#NULL!
1351	#NULL!	2	#NULL!	#NULL!	#NULL!	#NULL!	#NULL!	#NULL!	#NULL!	#NULL!	1		1	#NULL!	#NULL!	#NULL!	2	1	4	2	0	1	3	2	1	#NULL!	#NULL!	6	2	#NULL!	64	5	3	1	2	34	1	1	1	#NULL!	0	#NULL!	#NULL!	1	0	#NULL!
1352	#NULL!	2	#NULL!	#NULL!	#NULL!	#NULL!	#NULL!	#NULL!	#NULL!	#NULL!	1		2	#NULL!	#NULL!	#NULL!	2	1	4	2	0	1	3	2	0	#NULL!	#NULL!	#NULL!	#NULL!	#NULL!	64	5	3	1	2	13	1	1	0	#NULL!	0	#NULL!	#NULL!	1	#NULL!	#NULL!
1353	#NULL!	2	2	#NULL!	#NULL!	#NULL!	#NULL!	#NULL!	#NULL!	#NULL!	1		1	#NULL!	#NULL!	#NULL!	2	1	4	2	0	1	3	2	1	#NULL!	#NULL!	5	2	#NULL!	64	5	3	1	2	11	1	1	0	#NULL!	0	1	0	1	#NULL!	#NULL!
1354	#NULL!	2	#NULL!	#NULL!	#NULL!	#NULL!	#NULL!	#NULL!	#NULL!	#NULL!	2		1	#NULL!	#NULL!	#NULL!	2	1	4	2	0	1	3	2	0	#NULL!	#NULL!	#NULL!	#NULL!	#NULL!	64	5	3	1	2	4	1	3	1	#NULL!	1	0	1	2	#NULL!	#NULL!
1355	#NULL!	2	#NULL!	#NULL!	#NULL!	#NULL!	11	1	3	#NULL!	1		2	1	#NULL!	#NULL!	2	1	4	2	0	1	3	2	0	0	#NULL!	0	#NULL!	#NULL!	56	3	1	0	#NULL!	3	1	3	1	#NULL!	2	0	0	2	0	#NULL!
1356	#NULL!	2	#NULL!	#NULL!	#NULL!	#NULL!	56	2	7	2	2		1	#NULL!	#NULL!	#NULL!	2	1	4	2	0	1	3	2	1	#NULL!	#NULL!	3	1	#NULL!	60	4	2	1	1	77	0	0	0	#NULL!	0	1	0	1	#NULL!	1
1357	#NULL!	2	#NULL!	#NULL!	#NULL!	#NULL!	#NULL!	#NULL!	#NULL!	#NULL!	1		1	#NULL!	#NULL!	#NULL!	2	1	3	2	1	2	2	#NULL!	1	#NULL!	#NULL!	6	2	#NULL!	60	4	2	1	1	24	1	3	0	#NULL!	0	0	1	1	#NULL!	#NULL!
1358	#NULL!	2	#NULL!	#NULL!	#NULL!	#NULL!	#NULL!	#NULL!	#NULL!	#NULL!	1		2	#NULL!	#NULL!	#NULL!	2	1	3	2	1	2	2	#NULL!	0	#NULL!	#NULL!	0	#NULL!	#NULL!	60	4	2	1	1	44.5	1	0	0	#NULL!	0	0	1	1	#NULL!	#NULL!
1359	#NULL!	2	#NULL!	#NULL!	#NULL!	#NULL!	#NULL!	#NULL!	#NULL!	#NULL!	2		2	#NULL!	#NULL!	#NULL!	2	1	2	2	1	2	3	2	1	0	#NULL!	5	2	#NULL!	54	2	1	0	#NULL!	11	1	1	0	#NULL!	1	1	0	1	#NULL!	#NULL!
1360	#NULL!	2	#NULL!	#NULL!	#NULL!	#NULL!	#NULL!	#NULL!	#NULL!	#NULL!	2		2	#NULL!	#NULL!	#NULL!	2	1	4	2	0	1	3	2	1	1	#NULL!	5	2	#NULL!	54	2	1	0	#NULL!	19	0	1	0	#NULL!	1	1	0	1	#NULL!	#NULL!
1361	#NULL!	2	#NULL!	#NULL!	#NULL!	#NULL!	#NULL!	#NULL!	#NULL!	#NULL!	2		2	#NULL!	#NULL!	#NULL!	2	1	2	1	0	1	1	#NULL!	0	#NULL!	#NULL!	0	#NULL!	#NULL!	60	4	2	1	1	25	0	0	0	#NULL!	1	1	0	1	#NULL!	#NULL!
1362	#NULL!	2	#NULL!	#NULL!	#NULL!	#NULL!	#NULL!	#NULL!	#NULL!	#NULL!	1		1	#NULL!	#NULL!	#NULL!	2	1	4	2	1	2	3	2	1	#NULL!	#NULL!	1	1	#NULL!	62.5	4	3	1	2	24.3	0	1	1	#NULL!	0	1	0	1	#NULL!	#NULL!
1363	#NULL!	1	#NULL!	#NULL!	#NULL!	#NULL!	#NULL!	#NULL!	#NULL!	#NULL!	1		2	#NULL!	#NULL!	#NULL!	2	1	4	2	0	1	3	2	0	#NULL!	#NULL!	0	#NULL!	#NULL!	60	4	2	1	1	8.5	1	1	1	#NULL!	0	0	1	1	#NULL!	#NULL!
1364	#NULL!	2	#NULL!	#NULL!	#NULL!	#NULL!	#NULL!	#NULL!	#NULL!	#NULL!	1		2	#NULL!	#NULL!	#NULL!	2	1	3	2	1	2	2	#NULL!	0	1	#NULL!	0	#NULL!	#NULL!	58	3	1	0	#NULL!	26.2	1	0	0	#NULL!	0	0	1	1	#NULL!	#NULL!
1365	#NULL!	2	#NULL!	#NULL!	#NULL!	#NULL!	#NULL!	#NULL!	#NULL!	#NULL!	1		2	1	#NULL!	#NULL!	2	1	4	2	2	2	3	2	1	0	#NULL!	2	1	#NULL!	56	3	1	0	#NULL!	3.4	1	0	0	#NULL!	1	0	1	1	#NULL!	#NULL!
1366	#NULL!	2	#NULL!	#NULL!	#NULL!	#NULL!	#NULL!	#NULL!	#NULL!	#NULL!	1		2	#NULL!	#NULL!	#NULL!	2	1	4	2	1	2	3	2	1	#NULL!	#NULL!	3	1	#NULL!	60	4	2	1	1	6	0	3	1	#NULL!	2	1	0	2	#NULL!	#NULL!
1367	#NULL!	2	#NULL!	#NULL!	#NULL!	#NULL!	#NULL!	#NULL!	#NULL!	#NULL!	1		2	#NULL!	#NULL!	#NULL!	2	2	4	2	1	2	3	2	1	1	#NULL!	2	1	#NULL!	64	5	3	1	2	5	1	3	1	#NULL!	0	1	1	1	#NULL!	#NULL!
1368	#NULL!	2	#NULL!	#NULL!	#NULL!	#NULL!	#NULL!	#NULL!	#NULL!	#NULL!	2		1	#NULL!	#NULL!	#NULL!	2	1	4	2	2	2	3	2	1	#NULL!	#NULL!	2	1	#NULL!	60	4	2	1	1	2.2	1	3	1	#NULL!	3	0	1	1	#NULL!	#NULL!
1369	#NULL!	2	#NULL!	#NULL!	#NULL!	#NULL!	#NULL!	#NULL!	#NULL!	#NULL!	1		2	#NULL!	#NULL!	#NULL!	2	1	4	2	1	2	3	2	0	0	#NULL!	0	#NULL!	#NULL!	56	3	1	0	#NULL!	19	1	1	1	#NULL!	4	1	0	2	#NULL!	#NULL!
1370	#NULL!	2	#NULL!	#NULL!	#NULL!	#NULL!	#NULL!	#NULL!	#NULL!	#NULL!	1		1	#NULL!	#NULL!	#NULL!	2	1	4	2	1	2	3	2	0	1	#NULL!	0	#NULL!	#NULL!	66	5	3	1	2	3.5	1	0	1	#NULL!	0	0	1	1	#NULL!	#NULL!
1371	#NULL!	2	#NULL!	#NULL!	#NULL!	#NULL!	#NULL!	#NULL!	#NULL!	#NULL!	1		2	#NULL!	#NULL!	#NULL!	2	1	4	2	0	1	3	2	0	#NULL!	#NULL!	0	#NULL!	#NULL!	60	4	2	1	1	26.5	1	1	0	#NULL!	3	1	0	1	#NULL!	#NULL!
1372	#NULL!	1	#NULL!	#NULL!	#NULL!	#NULL!	#NULL!	#NULL!	#NULL!	#NULL!	1		1	#NULL!	#NULL!	#NULL!	2	1	4	2	0	1	3	2	0	#NULL!	#NULL!	0	#NULL!	#NULL!	64	5	3	1	2	11	1	2	1	#NULL!	2	1	1	1	#NULL!	#NULL!
1373	#NULL!	2	#NULL!	#NULL!	#NULL!	#NULL!	#NULL!	#NULL!	#NULL!	#NULL!	1		1	#NULL!	#NULL!	#NULL!	2	1	4	2	0	1	3	2	1	#NULL!	#NULL!	6	2	#NULL!	66	5	3	1	2	24	1	0	0	#NULL!	2	1	1	1	#NULL!	#NULL!
1374	#NULL!	2	#NULL!	#NULL!	#NULL!	#NULL!	#NULL!	#NULL!	#NULL!	#NULL!	1		2	#NULL!	#NULL!	#NULL!	2	1	3	2	1	2	2	#NULL!	0	1	#NULL!	0	#NULL!	#NULL!	66	5	3	1	2	4.3	1	0	0	#NULL!	0	0	0	1	0	#NULL!
1375	#NULL!	2	#NULL!	#NULL!	#NULL!	#NULL!	#NULL!	#NULL!	#NULL!	#NULL!	1		2	#NULL!	#NULL!	#NULL!	2	1	3	2	1	2	2	#NULL!	1	#NULL!	#NULL!	5	2	#NULL!	66	5	3	1	2	10.2	1	2	4	#NULL!	1	1	1	1	#NULL!	#NULL!
1376	#NULL!	2	2	45.02	#NULL!	#NULL!	45.02	2	5	2	1	71	2	#NULL!	#NULL!	#NULL!	2	1	3	2	1	1	2	1	#NULL!	#NULL!	#NULL!	#NULL!	#NULL!	#NULL!	60	4	2	1	1	13	0	2	0	#NULL!	0	#NULL!	#NULL!	2	#NULL!	1
1377	#NULL!	2	2	73.36	0	#NULL!	73.36	2	0	1	1	51	1	#NULL!	#NULL!	#NULL!	2	1	4	2	0	1	3	2	1	#NULL!	#NULL!	#NULL!	2	#NULL!	64	5	3	1	2	11	0	1	0	#NULL!	1	#NULL!	#NULL!	1	#NULL!	0
1378	#NULL!	2	2	11.55	#NULL!	#NULL!	11.55	1	3	1	1	62	1	#NULL!	#NULL!	#NULL!	2	1	4	2	2	1	3	2	1	#NULL!	#NULL!	#NULL!	2	#NULL!	62	4	2	1	1	12	0	2	1	#NULL!	0	#NULL!	#NULL!	2	#NULL!	0
1379	#NULL!	1	2	11.55	#NULL!	#NULL!	11.55	1	3	1	1	62	1	#NULL!	#NULL!	#NULL!	2	1	4	2	2	1	3	2	1	#NULL!	#NULL!	#NULL!	2	#NULL!	62	4	2	1	1	12	0	2	1	#NULL!	0	#NULL!	#NULL!	2	#NULL!	0
1380	#NULL!	2	2	44.84	#NULL!	#NULL!	44.84	2	8	2	2	47	1	#NULL!	#NULL!	#NULL!	2	1	4	2	1	1	3	2	1	#NULL!	#NULL!	#NULL!	1	#NULL!	60	4	2	1	1	79.21	1	1	0	#NULL!	1	0	0	1	0	1
1381	#NULL!	2	1	18.1	#NULL!	#NULL!	18.1	1	3	1	2	65	1	#NULL!	#NULL!	#NULL!	2	2	2	1	2	1	3	2	1	#NULL!	#NULL!	#NULL!	1	#NULL!	61	4	2	1	1	18.76	1	0	0	#NULL!	0	2	#NULL!	2	#NULL!	0
1382	#NULL!	2	1	22.71	#NULL!	#NULL!	22.71	1	5	2	1	60	1	#NULL!	#NULL!	#NULL!	2	1	4	2	1	1	3	2	1	#NULL!	#NULL!	#NULL!	2	#NULL!	60	4	2	1	1	18	0	0	0	#NULL!	0	4	#NULL!	2	#NULL!	1
1383	#NULL!	2	1	65.93	#NULL!	#NULL!	65.93	2	0	1	2	48	1	#NULL!	#NULL!	#NULL!	2	1	4	2	2	1	3	2	1	#NULL!	#NULL!	#NULL!	1	#NULL!	64	5	3	1	2	16.2	0	2	0	#NULL!	1	#NULL!	#NULL!	2	#NULL!	0
1384	#NULL!	2	1	65.93	#NULL!	#NULL!	65.93	2	0	1	2	48	1	#NULL!	#NULL!	#NULL!	2	1	4	2	2	1	3	2	1	#NULL!	#NULL!	#NULL!	1	#NULL!	64	5	3	1	2	16.2	0	2	0	#NULL!	0	#NULL!	#NULL!	2	#NULL!	0
1385	#NULL!	2	2	33	0	#NULL!	33	1	5	2	1	60	1	#NULL!	#NULL!	#NULL!	2	1	3	2	0	1	2	1	1	#NULL!	#NULL!	#NULL!	1	#NULL!	62	4	2	1	1	40	0	1	0	#NULL!	1	1	0	1	#NULL!	1
1386	#NULL!	2	2	17.92	#NULL!	#NULL!	17.92	1	5	2	1	57	1	#NULL!	#NULL!	#NULL!	2	1	4	2	2	1	3	2	#NULL!	#NULL!	#NULL!	#NULL!	#NULL!	#NULL!	62	4	2	1	1	10	0	1	0	#NULL!	1	#NULL!	#NULL!	2	#NULL!	1
1387	#NULL!	2	1	31.37	#NULL!	#NULL!	31.37	1	4	#NULL!	2	50	1	#NULL!	#NULL!	#NULL!	2	1	4	2	2	1	3	2	1	#NULL!	#NULL!	#NULL!	1	#NULL!	61	4	2	1	1	23.06	0	2	1	#NULL!	1	2	#NULL!	2	#NULL!	#NULL!
1388	#NULL!	2	1	47.38	0	#NULL!	47.38	2	4.4	1	1	64	1	#NULL!	#NULL!	#NULL!	2	1	3	2	0	1	2	1	1	#NULL!	#NULL!	#NULL!	2	#NULL!	60	4	2	1	1	33.58	1	1	1	#NULL!	1	#NULL!	#NULL!	2	0	0
1389	#NULL!	2	1	18.15	0	#NULL!	18.15	1	3	1	1	79	2	#NULL!	#NULL!	#NULL!	2	1	2	1	0	1	1	1	#NULL!	#NULL!	#NULL!	#NULL!	#NULL!	#NULL!	64	5	3	1	2	19	0	2	2	#NULL!	0	#NULL!	1	2	#NULL!	0
1390	#NULL!	2	2	43.56	#NULL!	#NULL!	43.56	2	4	1	1	68	2	#NULL!	#NULL!	#NULL!	2	1	3	2	1	1	2	1	#NULL!	#NULL!	#NULL!	#NULL!	#NULL!	#NULL!	64	5	3	1	2	14	0	1	0	#NULL!	0	#NULL!	#NULL!	2	#NULL!	0
1391	#NULL!	2	2	43.56	#NULL!	#NULL!	43.56	2	4	1	1	68	2	#NULL!	#NULL!	#NULL!	2	1	3	2	1	1	2	1	#NULL!	#NULL!	#NULL!	#NULL!	#NULL!	#NULL!	64	5	3	1	2	14	0	1	0	#NULL!	0	#NULL!	#NULL!	2	#NULL!	0
1392	#NULL!	2	2	95.08	#NULL!	#NULL!	95.08	2	4	1	1	55	1	#NULL!	#NULL!	#NULL!	2	1	4	2	2	1	3	2	#NULL!	#NULL!	#NULL!	#NULL!	#NULL!	#NULL!	64	5	3	1	2	5	0	0	0	#NULL!	1	#NULL!	#NULL!	2	#NULL!	0
1393	#NULL!	2	1	32.07	0	#NULL!	32.07	1	5	2	1	61	1	#NULL!	#NULL!	#NULL!	2	1	2	1	0	1	1	1	1	#NULL!	#NULL!	#NULL!	2	#NULL!	64	5	3	1	2	58.87	1	1	0	#NULL!	0	#NULL!	#NULL!	2	0	1
1394	#NULL!	2	1	96.11	#NULL!	#NULL!	96.11	2	9.611	2	2	46	1	#NULL!	#NULL!	#NULL!	2	1	4	2	2	1	3	2	1	#NULL!	#NULL!	#NULL!	1	#NULL!	64	5	3	1	2	76.81	1	2	0	#NULL!	1	#NULL!	#NULL!	2	0	1
1395	#NULL!	2	1	30.93	0	#NULL!	30.93	1	4	1	2	74	2	#NULL!	#NULL!	#NULL!	2	1	4	2	0	1	3	2	#NULL!	#NULL!	#NULL!	#NULL!	#NULL!	#NULL!	64	5	3	1	2	11	0	0	0	#NULL!	0	#NULL!	#NULL!	2	#NULL!	0
1396	#NULL!	2	1	72.38	#NULL!	#NULL!	72.38	2	8	2	1	71	2	#NULL!	#NULL!	#NULL!	2	1	4	2	2	1	3	2	#NULL!	#NULL!	#NULL!	#NULL!	#NULL!	#NULL!	60	4	2	1	1	11	0	1	0	#NULL!	0	#NULL!	#NULL!	2	#NULL!	1
1397	#NULL!	2	1	72.38	#NULL!	#NULL!	72.38	2	8	2	1	71	2	#NULL!	#NULL!	#NULL!	2	1	4	2	2	1	3	2	#NULL!	#NULL!	#NULL!	#NULL!	#NULL!	#NULL!	60	4	2	1	1	11	0	1	0	#NULL!	0	#NULL!	#NULL!	2	#NULL!	1
1398	#NULL!	2	1	17.7	0	#NULL!	17.7	1	4	1	1	56	1	#NULL!	#NULL!	#NULL!	2	1	2	1	0	1	1	1	#NULL!	#NULL!	#NULL!	#NULL!	#NULL!	#NULL!	64	5	3	1	2	85.68	1	2	0	#NULL!	0	#NULL!	#NULL!	2	0	0
1399	#NULL!	2	1	24.82	0	#NULL!	24.82	1	5	2	2	69	2	#NULL!	#NULL!	#NULL!	2	1	3	2	0	1	2	1	#NULL!	0	#NULL!	#NULL!	#NULL!	#NULL!	64	5	3	1	2	52	0	0	0	#NULL!	1	#NULL!	#NULL!	1	0	1
1400	#NULL!	2	1	15.37	#NULL!	#NULL!	15.37	1	3	1	1	62	1	#NULL!	#NULL!	#NULL!	2	2	4	2	2	1	3	2	1	#NULL!	#NULL!	#NULL!	1	#NULL!	64	5	3	1	2	11	0	1	0	#NULL!	0	#NULL!	#NULL!	2	#NULL!	0
1401	#NULL!	2	1	15.16	#NULL!	#NULL!	15.16	1	0	1	1	59	1	#NULL!	#NULL!	#NULL!	2	1	2	1	1	1	2	1	1	#NULL!	#NULL!	#NULL!	1	#NULL!	64	5	3	1	2	14	0	1	0	#NULL!	1	#NULL!	3	2	#NULL!	0
1402	#NULL!	2	1	15.16	#NULL!	#NULL!	15.16	1	0	1	1	59	1	#NULL!	#NULL!	#NULL!	2	1	2	1	1	1	2	1	1	#NULL!	#NULL!	#NULL!	1	#NULL!	64	5	3	1	2	14	0	1	0	#NULL!	1	#NULL!	3	2	#NULL!	0
1403	#NULL!	2	1	35.42	#NULL!	#NULL!	35.42	2	6	2	1	63	1	#NULL!	#NULL!	#NULL!	2	1	2	1	1	1	2	1	1	#NULL!	#NULL!	#NULL!	2	#NULL!	62	4	2	1	1	51.84	0	1	0	#NULL!	0	#NULL!	#NULL!	1	0	1
1404	#NULL!	2	1	16.43	#NULL!	#NULL!	16.43	1	5	2	2	60	1	#NULL!	#NULL!	#NULL!	2	1	2	1	1	1	2	1	#NULL!	#NULL!	#NULL!	#NULL!	#NULL!	#NULL!	60	4	2	1	1	5.9	0	0	3	#NULL!	0	#NULL!	#NULL!	2	#NULL!	1
1405	#NULL!	2	1	48.05	#NULL!	#NULL!	48.05	2	0	1	1	71	2	#NULL!	#NULL!	#NULL!	2	2	4	2	1	1	3	2	1	#NULL!	#NULL!	#NULL!	1	#NULL!	61	4	2	1	1	13	0	0	0	#NULL!	1	1	0	1	#NULL!	0
1406	#NULL!	2	1	7.55	0	#NULL!	7.55	1	3	1	2	61	1	#NULL!	#NULL!	#NULL!	2	1	1	1	0	1	1	1	1	#NULL!	#NULL!	#NULL!	1	#NULL!	62	4	2	1	1	14.55	0	1	0	#NULL!	1	#NULL!	#NULL!	1	0	0
1407	#NULL!	2	1	46.28	0	#NULL!	46.28	2	7	2	2	68	2	#NULL!	#NULL!	#NULL!	2	1	4	2	0	1	3	2	#NULL!	#NULL!	#NULL!	#NULL!	#NULL!	#NULL!	60	4	2	1	1	17	0	1	0	#NULL!	0	#NULL!	#NULL!	1	0	1
1408	#NULL!	2	1	15.26	0	#NULL!	15.26	1	2	#NULL!	1	61	1	#NULL!	#NULL!	#NULL!	2	1	2	1	0	1	1	1	1	#NULL!	#NULL!	#NULL!	2	#NULL!	61	4	2	1	1	13.17	0	2	0	#NULL!	0	#NULL!	1	1	#NULL!	#NULL!
1409	#NULL!	2	2	72.71	#NULL!	#NULL!	72.71	2	0	1	1	61	1	#NULL!	#NULL!	#NULL!	2	1	4	2	1	1	3	2	1	#NULL!	#NULL!	#NULL!	1	#NULL!	64	5	3	1	2	39.7	0	3	1	#NULL!	1	#NULL!	#NULL!	2	#NULL!	0
1410	#NULL!	2	2	38.93	#NULL!	#NULL!	38.93	2	0	1	2	53	1	#NULL!	#NULL!	#NULL!	2	1	4	2	2	1	3	2	#NULL!	#NULL!	#NULL!	#NULL!	#NULL!	#NULL!	64	5	3	1	2	3	0	1	0	#NULL!	1	#NULL!	#NULL!	2	0	0
1411	#NULL!	2	1	18.9	#NULL!	#NULL!	18.9	1	5	2	2	69	2	#NULL!	#NULL!	#NULL!	2	1	2	1	2	1	3	2	#NULL!	#NULL!	#NULL!	#NULL!	#NULL!	#NULL!	60	4	2	1	1	36.37	0	0	0	#NULL!	0	#NULL!	#NULL!	2	#NULL!	1
1412	#NULL!	2	2	26	#NULL!	#NULL!	26	1	5	2	2	66	2	#NULL!	#NULL!	#NULL!	2	1	3	2	1	1	2	1	1	#NULL!	#NULL!	#NULL!	2	#NULL!	61	4	2	1	1	20.21	1	1	0	#NULL!	1	#NULL!	#NULL!	2	0	1
1413	#NULL!	2	1	33.31	#NULL!	#NULL!	33.31	1	3.331	1	1	62	1	#NULL!	#NULL!	#NULL!	2	1	4	2	1	1	3	2	#NULL!	#NULL!	#NULL!	#NULL!	#NULL!	#NULL!	60	4	2	1	1	48.13	1	0	0	#NULL!	0	#NULL!	#NULL!	1	0	0
1414	#NULL!	2	1	12.39	#NULL!	#NULL!	12.39	1	2	1	2	61	1	#NULL!	#NULL!	#NULL!	2	1	2	1	2	1	3	2	#NULL!	#NULL!	#NULL!	#NULL!	#NULL!	#NULL!	62	4	2	1	1	96.82	1	2	0	#NULL!	0	0	0	1	0	0
1415	#NULL!	2	2	55.23	#NULL!	#NULL!	55.23	2	4	1	2	70	2	#NULL!	#NULL!	#NULL!	2	1	4	2	1	1	3	2	#NULL!	#NULL!	#NULL!	#NULL!	#NULL!	#NULL!	60	4	2	1	1	13	0	2	1	#NULL!	0	#NULL!	#NULL!	2	0	0
1416	#NULL!	2	2	84.94	0	#NULL!	84.94	2	#NULL!	#NULL!	1	63	1	#NULL!	#NULL!	#NULL!	2	1	4	2	0	1	3	2	1	#NULL!	#NULL!	#NULL!	1	#NULL!	61	4	2	1	1	7.92	0	2	0	#NULL!	0	#NULL!	#NULL!	2	#NULL!	#NULL!
1417	#NULL!	2	2	11.54	0	#NULL!	11.54	1	3	1	1	63	1	#NULL!	#NULL!	#NULL!	2	1	2	1	0	1	1	1	1	0	#NULL!	#NULL!	1	#NULL!	64	5	3	1	2	89.72	1	1	0	#NULL!	1	#NULL!	#NULL!	2	0	0
1418	#NULL!	2	1	58	0	#NULL!	58	2	0	1	1	57	1	#NULL!	#NULL!	#NULL!	2	1	2	1	0	1	1	1	#NULL!	#NULL!	#NULL!	#NULL!	#NULL!	#NULL!	64	5	3	1	2	14.2	0	1	2	#NULL!	1	#NULL!	#NULL!	2	#NULL!	0
1419	#NULL!	2	1	18.58	#NULL!	#NULL!	18.58	1	5	2	1	69	2	#NULL!	#NULL!	#NULL!	2	1	2	1	1	1	2	1	1	#NULL!	#NULL!	#NULL!	1	#NULL!	64	5	3	1	2	17.51	1	2	0	#NULL!	1	#NULL!	#NULL!	2	0	1
1420	#NULL!	2	2	20.96	#NULL!	#NULL!	20.96	1	4	1	2	66	2	#NULL!	#NULL!	#NULL!	2	1	2	1	2	1	3	2	#NULL!	#NULL!	#NULL!	#NULL!	#NULL!	#NULL!	62	4	2	1	1	25	0	2	0	#NULL!	0	#NULL!	#NULL!	2	#NULL!	0
1421	#NULL!	2	1	87.31	#NULL!	#NULL!	87.31	2	9	2	1	72	2	#NULL!	#NULL!	#NULL!	2	1	4	2	1	1	3	2	#NULL!	#NULL!	#NULL!	#NULL!	#NULL!	#NULL!	61	4	2	1	1	25.07	1	0	0	#NULL!	0	#NULL!	#NULL!	1	0	1
1422	#NULL!	2	1	22.69	#NULL!	#NULL!	22.69	1	5	2	1	61	1	#NULL!	#NULL!	#NULL!	2	1	3	2	1	1	2	1	1	#NULL!	#NULL!	#NULL!	1	#NULL!	61	4	2	1	1	2.2	0	1	0	#NULL!	1	#NULL!	#NULL!	2	#NULL!	1
1423	#NULL!	2	2	8.6	0	#NULL!	8.6	1	3	1	2	55	1	#NULL!	#NULL!	#NULL!	2	1	2	1	0	1	1	1	1	#NULL!	#NULL!	#NULL!	1	#NULL!	66	5	3	1	2	129.08	1	1	0	#NULL!	0	#NULL!	#NULL!	2	0	0
1424	#NULL!	2	1	75.11	0	#NULL!	75.11	2	7	2	2	80	2	#NULL!	#NULL!	#NULL!	2	1	2	1	0	1	1	1	#NULL!	#NULL!	#NULL!	#NULL!	#NULL!	#NULL!	60	4	2	1	1	127.44	1	4	1	#NULL!	0	0	0	1	0	1
1425	#NULL!	2	2	15.09	#NULL!	#NULL!	15.09	1	2	1	2	71	2	#NULL!	#NULL!	#NULL!	2	1	2	1	1	1	2	1	1	#NULL!	#NULL!	#NULL!	2	#NULL!	61	4	2	1	1	27.24	1	2	0	#NULL!	0	#NULL!	#NULL!	2	0	0
1426	#NULL!	2	1	17.57	0	#NULL!	17.57	1	2	1	1	58	1	#NULL!	#NULL!	#NULL!	2	1	2	1	0	1	1	1	1	#NULL!	#NULL!	#NULL!	1	#NULL!	64	5	3	1	2	51.25	1	1	2	#NULL!	0	#NULL!	#NULL!	2	0	0
1427	#NULL!	2	1	11.73	0	#NULL!	11.73	1	4	1	2	58	1	#NULL!	#NULL!	#NULL!	2	1	2	1	0	1	1	1	#NULL!	#NULL!	#NULL!	#NULL!	#NULL!	#NULL!	64	5	3	1	2	95.18	1	1	0	#NULL!	0	#NULL!	#NULL!	1	#NULL!	0
1428	#NULL!	2	2	102.67	#NULL!	#NULL!	102.67	2	6	2	1	68	2	#NULL!	#NULL!	#NULL!	2	1	4	2	1	1	3	2	#NULL!	#NULL!	#NULL!	#NULL!	#NULL!	#NULL!	61	4	2	1	1	45.27	1	0	0	#NULL!	1	#NULL!	#NULL!	2	0	1
1429	#NULL!	2	2	34.64	#NULL!	#NULL!	34.64	1	0	1	2	72	2	#NULL!	#NULL!	#NULL!	2	1	4	2	1	1	3	2	1	#NULL!	#NULL!	#NULL!	1	#NULL!	60	4	2	1	1	13	0	2	0	#NULL!	1	#NULL!	#NULL!	2	#NULL!	0
1430	#NULL!	2	1	71.25	#NULL!	#NULL!	71.25	2	6	2	1	58	1	#NULL!	#NULL!	#NULL!	2	1	2	1	2	1	3	2	1	#NULL!	#NULL!	#NULL!	1	#NULL!	60	4	2	1	1	8.2	0	2	0	#NULL!	0	#NULL!	#NULL!	3	#NULL!	1
1431	#NULL!	2	1	60.1	#NULL!	#NULL!	60.1	2	7	2	1	48	1	#NULL!	#NULL!	#NULL!	2	2	4	2	1	1	3	2	1	#NULL!	#NULL!	#NULL!	2	#NULL!	61	4	2	1	1	9.33	1	1	0	#NULL!	0	#NULL!	#NULL!	2	0	1
1432	#NULL!	2	2	26.77	#NULL!	#NULL!	26.77	1	4	1	1	73	2	#NULL!	#NULL!	#NULL!	2	1	2	1	1	1	2	1	#NULL!	#NULL!	#NULL!	#NULL!	#NULL!	#NULL!	62	4	2	1	1	15.2	0	2	2	#NULL!	1	#NULL!	#NULL!	2	#NULL!	0
1433	#NULL!	2	1	70.46	#NULL!	#NULL!	70.46	2	0	1	1	77	2	#NULL!	#NULL!	#NULL!	2	1	4	2	1	1	3	2	#NULL!	#NULL!	#NULL!	#NULL!	#NULL!	#NULL!	64	5	3	1	2	20	0	1	0	#NULL!	1	#NULL!	#NULL!	2	0	0
1434	#NULL!	2	1	36.09	0	#NULL!	36.09	2	4	1	1	58	1	#NULL!	#NULL!	#NULL!	2	1	4	2	0	1	3	2	1	#NULL!	#NULL!	#NULL!	1	#NULL!	60	4	2	1	1	54.34	1	0	0	#NULL!	1	#NULL!	#NULL!	2	0	0
1435	#NULL!	2	2	12.28	0	#NULL!	12.28	1	3	1	2	60	1	#NULL!	#NULL!	#NULL!	2	1	2	1	0	1	1	1	1	#NULL!	#NULL!	#NULL!	1	#NULL!	60	4	2	1	1	43.5	0	2	1	#NULL!	0	1	0	1	#NULL!	0
1436	#NULL!	2	1	30.13	0	#NULL!	30.13	1	4	1	1	52	1	#NULL!	#NULL!	#NULL!	2	1	2	1	0	1	1	1	#NULL!	#NULL!	#NULL!	#NULL!	#NULL!	#NULL!	66	5	3	1	2	49.2	0	2	2	#NULL!	1	#NULL!	#NULL!	2	#NULL!	0
1437	#NULL!	2	1	12.34	#NULL!	#NULL!	12.34	1	2	1	2	53	1	#NULL!	#NULL!	#NULL!	2	1	4	2	1	1	3	2	1	#NULL!	#NULL!	#NULL!	1	#NULL!	61	4	2	1	1	6.14	0	0	0	#NULL!	0	#NULL!	#NULL!	2	#NULL!	0
1438	#NULL!	2	2	17.28	0	#NULL!	17.28	1	3	1	1	68	2	#NULL!	#NULL!	#NULL!	2	1	2	1	0	1	1	1	#NULL!	#NULL!	#NULL!	#NULL!	#NULL!	#NULL!	64	5	3	1	2	32.3	0	1	0	#NULL!	1	#NULL!	1	1	#NULL!	0
1439	#NULL!	2	1	4.69	0	#NULL!	4.69	1	2	1	1	62	1	#NULL!	#NULL!	#NULL!	2	1	2	1	0	1	1	1	#NULL!	#NULL!	#NULL!	#NULL!	#NULL!	#NULL!	62	4	2	1	1	62.2	0	0	0	#NULL!	0	#NULL!	5	1	#NULL!	0
1440	#NULL!	2	1	4.69	#NULL!	#NULL!	4.69	1	2	1	1	62	1	#NULL!	#NULL!	#NULL!	2	1	2	1	1	1	2	1	#NULL!	#NULL!	#NULL!	#NULL!	#NULL!	#NULL!	62	4	2	1	1	62.19	0	0	0	#NULL!	1	#NULL!	#NULL!	1	#NULL!	0
1441	#NULL!	2	2	58.26	#NULL!	#NULL!	58.26	2	2	1	1	69	2	#NULL!	#NULL!	#NULL!	2	1	3	2	2	1	3	2	#NULL!	#NULL!	#NULL!	#NULL!	#NULL!	#NULL!	61	4	2	1	1	25.26	1	1	0	#NULL!	0	#NULL!	#NULL!	2	0	0
1442	#NULL!	2	1	78.32	#NULL!	#NULL!	78.32	2	5	2	1	67	2	#NULL!	#NULL!	#NULL!	2	1	4	2	2	1	3	2	#NULL!	#NULL!	#NULL!	#NULL!	#NULL!	#NULL!	64	5	3	1	2	4.63	0	3	2	#NULL!	1	#NULL!	1	3	#NULL!	1
1443	#NULL!	2	1	25.17	#NULL!	#NULL!	25.17	1	4	1	1	50	1	#NULL!	#NULL!	#NULL!	2	1	2	1	2	1	3	2	1	#NULL!	#NULL!	#NULL!	2	#NULL!	60	4	2	1	1	15.47	0	1	0	#NULL!	1	#NULL!	1	2	#NULL!	0
1444	#NULL!	2	1	12.78	#NULL!	#NULL!	12.78	1	2	1	2	65	1	#NULL!	#NULL!	#NULL!	2	1	2	1	1	1	2	1	#NULL!	#NULL!	#NULL!	#NULL!	#NULL!	#NULL!	60	4	2	1	1	64.8	0	0	0	#NULL!	1	0	1	1	#NULL!	0
1445	#NULL!	2	2	43.32	0	#NULL!	43.32	2	5	2	2	64	1	#NULL!	#NULL!	#NULL!	2	1	3	2	0	1	2	1	#NULL!	#NULL!	#NULL!	#NULL!	#NULL!	#NULL!	62	4	2	1	1	26.28	0	3	0	#NULL!	1	#NULL!	#NULL!	2	0	1
1446	#NULL!	2	1	58.84	0	#NULL!	58.84	2	3	1	1	59	1	#NULL!	#NULL!	#NULL!	2	1	4	2	0	1	3	2	1	#NULL!	#NULL!	#NULL!	2	#NULL!	64	5	3	1	2	43.6	0	2	0	#NULL!	1	#NULL!	#NULL!	1	#NULL!	0
1447	#NULL!	2	1	41.24	#NULL!	#NULL!	41.24	2	5	2	1	67	2	#NULL!	#NULL!	#NULL!	2	1	2	1	1	1	2	1	#NULL!	#NULL!	#NULL!	#NULL!	#NULL!	#NULL!	61	4	2	1	1	10.71	0	1	0	#NULL!	1	#NULL!	#NULL!	2	#NULL!	1
1448	#NULL!	2	1	17	0	#NULL!	17	1	3	1	1	56	1	#NULL!	#NULL!	#NULL!	2	1	4	2	0	1	3	2	1	#NULL!	#NULL!	#NULL!	1	#NULL!	64	5	3	1	2	80.13	1	1	0	#NULL!	1	#NULL!	#NULL!	1	0	0
1449	#NULL!	2	2	35.28	0	#NULL!	35.28	2	0	1	2	73	2	#NULL!	#NULL!	#NULL!	2	1	4	2	0	1	3	2	#NULL!	#NULL!	#NULL!	#NULL!	#NULL!	#NULL!	64	5	3	1	2	39	0	1	0	#NULL!	1	#NULL!	#NULL!	2	#NULL!	0
1450	#NULL!	2	1	89.01	0	#NULL!	89.01	2	0	1	1	70	2	#NULL!	#NULL!	#NULL!	2	2	4	2	0	1	3	2	#NULL!	#NULL!	#NULL!	#NULL!	#NULL!	#NULL!	64	5	3	1	2	13	0	1	0	#NULL!	0	1	0	1	#NULL!	0
1451	#NULL!	2	2	89.01	0	#NULL!	89.01	2	0	1	1	70	2	#NULL!	#NULL!	#NULL!	2	2	4	2	0	1	3	2	#NULL!	#NULL!	#NULL!	#NULL!	#NULL!	#NULL!	64	5	3	1	2	13	0	1	0	#NULL!	0	#NULL!	#NULL!	1	#NULL!	0
1452	#NULL!	2	1	30.87	#NULL!	#NULL!	30.87	1	5.5	#NULL!	2	63	1	#NULL!	#NULL!	#NULL!	2	1	2	1	1	1	2	1	1	#NULL!	#NULL!	#NULL!	2	#NULL!	60	4	2	1	1	45.77	1	1	0	#NULL!	0	#NULL!	#NULL!	1	0	#NULL!
1453	#NULL!	2	1	30.43	#NULL!	#NULL!	30.43	1	3.043	1	2	56	1	#NULL!	#NULL!	#NULL!	2	1	4	2	1	1	3	2	1	#NULL!	#NULL!	#NULL!	1	#NULL!	60	4	2	1	1	57.59	1	1	0	#NULL!	0	#NULL!	#NULL!	2	0	0
1454	#NULL!	2	1	16.03	0	#NULL!	16.03	1	1	1	1	80	2	#NULL!	#NULL!	#NULL!	2	1	2	1	0	1	1	1	#NULL!	1	#NULL!	#NULL!	#NULL!	#NULL!	58.8	3	1	0	#NULL!	24	0	0	4	#NULL!	0	#NULL!	#NULL!	2	#NULL!	0
1455	#NULL!	2	1	19.69	0	#NULL!	19.69	1	3	1	1	72	2	#NULL!	#NULL!	#NULL!	2	2	2	1	0	1	1	1	#NULL!	#NULL!	#NULL!	#NULL!	#NULL!	#NULL!	64	5	3	1	2	62.5	0	2	0	#NULL!	0	0	0	1	0	0
1456	#NULL!	2	2	19.69	0	#NULL!	19.69	1	3	1	1	72	2	#NULL!	#NULL!	#NULL!	2	1	2	1	0	1	1	1	#NULL!	#NULL!	#NULL!	#NULL!	#NULL!	#NULL!	64	5	3	1	2	62.62	0	2	0	#NULL!	0	#NULL!	#NULL!	1	#NULL!	0
1457	#NULL!	2	1	43.48	0	#NULL!	43.48	2	4	1	2	58	1	#NULL!	#NULL!	#NULL!	2	1	4	2	0	1	3	2	#NULL!	#NULL!	#NULL!	#NULL!	#NULL!	#NULL!	60	4	2	1	1	16.2	0	1	0	#NULL!	0	#NULL!	#NULL!	1	#NULL!	0
1458	#NULL!	2	1	96.81	0	#NULL!	96.81	2	9.681	2	1	60	1	#NULL!	#NULL!	#NULL!	2	1	4	2	0	1	3	2	1	#NULL!	#NULL!	#NULL!	2	#NULL!	64	5	3	1	2	34	0	1	1	#NULL!	0	#NULL!	#NULL!	1	0	1
1459	#NULL!	2	1	96.81	0	#NULL!	96.81	2	0	1	1	60	1	#NULL!	#NULL!	#NULL!	2	2	4	2	0	1	3	2	1	#NULL!	#NULL!	#NULL!	2	#NULL!	64	5	3	1	2	34	0	1	1	#NULL!	0	0	0	1	0	0
1460	#NULL!	2	1	47.17	#NULL!	#NULL!	47.17	2	0	1	1	64	1	#NULL!	#NULL!	#NULL!	2	1	3	2	1	1	2	1	#NULL!	#NULL!	#NULL!	#NULL!	#NULL!	#NULL!	64.4	5	3	1	2	14	0	1	0	#NULL!	2	#NULL!	#NULL!	2	#NULL!	0
1461	#NULL!	2	2	12.18	0	#NULL!	12.18	1	3	1	2	64	1	#NULL!	#NULL!	#NULL!	2	2	4	2	0	1	3	2	#NULL!	#NULL!	#NULL!	#NULL!	#NULL!	#NULL!	62	4	2	1	1	12	0	2	1	#NULL!	2	1	0	1	#NULL!	0
1462	#NULL!	2	1	29.87	#NULL!	#NULL!	29.87	1	5	2	1	72	2	#NULL!	#NULL!	#NULL!	2	1	2	1	1	1	2	1	#NULL!	#NULL!	#NULL!	#NULL!	#NULL!	#NULL!	61	4	2	1	1	4.83	0	2	1	#NULL!	2	#NULL!	#NULL!	1	0	1
1463	#NULL!	2	1	28.19	#NULL!	#NULL!	28.19	1	4	1	1	67	2	#NULL!	#NULL!	#NULL!	2	1	2	1	1	1	2	1	1	#NULL!	#NULL!	#NULL!	1	#NULL!	60	4	2	1	1	11.86	0	2	0	#NULL!	2	#NULL!	#NULL!	1	#NULL!	0
1464	#NULL!	2	1	25.71	#NULL!	#NULL!	25.71	1	6	2	2	65	1	#NULL!	#NULL!	#NULL!	2	1	3	2	1	1	2	1	#NULL!	#NULL!	#NULL!	#NULL!	#NULL!	#NULL!	60	4	2	1	1	47.93	0	0	0	#NULL!	2	1	1	1	#NULL!	1
1465	#NULL!	2	1	21.84	0	#NULL!	21.84	1	2.184	1	1	52	1	#NULL!	#NULL!	#NULL!	2	1	2	1	0	1	1	1	1	#NULL!	#NULL!	#NULL!	2	#NULL!	62	4	2	1	1	17.15	0	2	0	#NULL!	2	1	0	1	#NULL!	0
1466	#NULL!	2	2	14.39	0	#NULL!	14.39	1	5	2	2	72	2	#NULL!	#NULL!	#NULL!	2	1	4	2	0	1	3	2	1	#NULL!	#NULL!	#NULL!	1	#NULL!	62	4	2	1	1	6	0	1	0	#NULL!	2	#NULL!	#NULL!	2	0	1
1467	#NULL!	2	1	20.51	0	#NULL!	20.51	1	4	1	1	60	1	#NULL!	#NULL!	#NULL!	2	1	2	1	0	1	1	1	1	#NULL!	#NULL!	#NULL!	1	#NULL!	61	4	2	1	1	42.45	1	2	0	#NULL!	2	#NULL!	#NULL!	1	0	0
1468	#NULL!	2	2	46.19	0	#NULL!	46.19	2	0	1	2	53	1	#NULL!	#NULL!	#NULL!	2	1	3	2	0	1	2	1	#NULL!	#NULL!	#NULL!	#NULL!	#NULL!	#NULL!	64	5	3	1	2	37.7	0	1	2	#NULL!	2	#NULL!	#NULL!	1	#NULL!	0
1469	#NULL!	2	1	18.42	#NULL!	#NULL!	18.42	1	4	1	1	51	1	#NULL!	#NULL!	#NULL!	2	1	2	1	1	1	2	1	1	#NULL!	#NULL!	#NULL!	2	#NULL!	60	4	2	1	1	19.42	1	1	0	#NULL!	2	#NULL!	#NULL!	2	0	0
1470	#NULL!	2	1	43.74	0	#NULL!	43.74	2	7	2	2	59	1	#NULL!	#NULL!	#NULL!	2	1	2	1	0	1	1	1	#NULL!	#NULL!	#NULL!	#NULL!	#NULL!	#NULL!	64	5	3	1	2	45.5	0	1	1	#NULL!	2	#NULL!	#NULL!	1	0	1
1471	#NULL!	2	2	51.23	#NULL!	#NULL!	51.23	2	6	2	1	63	1	#NULL!	#NULL!	#NULL!	2	1	3	2	1	1	2	1	#NULL!	#NULL!	#NULL!	#NULL!	#NULL!	#NULL!	61	4	2	1	1	18.5	0	2	0	#NULL!	2	1	#NULL!	2	#NULL!	1
1472	#NULL!	2	1	54.9	#NULL!	#NULL!	54.9	2	5	2	1	64	1	#NULL!	#NULL!	#NULL!	2	1	2	1	1	1	2	1	1	#NULL!	#NULL!	#NULL!	1	#NULL!	61	4	2	1	1	25.17	1	1	2	#NULL!	2	#NULL!	#NULL!	1	0	1
1473	#NULL!	2	1	33.08	#NULL!	#NULL!	33.08	1	5	2	1	75	2	#NULL!	#NULL!	#NULL!	2	1	3	2	1	1	2	1	#NULL!	#NULL!	#NULL!	#NULL!	#NULL!	#NULL!	64	5	3	1	2	23	0	1	0	#NULL!	2	#NULL!	#NULL!	1	#NULL!	1
1474	#NULL!	2	1	17.98	#NULL!	#NULL!	17.98	1	2	1	1	60	1	#NULL!	#NULL!	#NULL!	2	1	4	2	1	1	3	2	#NULL!	#NULL!	#NULL!	#NULL!	#NULL!	#NULL!	64	5	3	1	2	12	0	2	0	#NULL!	2	#NULL!	1	1	#NULL!	0
1475	#NULL!	2	2	19.23	#NULL!	#NULL!	19.23	1	4	1	2	56	1	#NULL!	#NULL!	#NULL!	2	1	2	1	1	1	2	1	1	#NULL!	#NULL!	#NULL!	2	#NULL!	60	4	2	1	1	52.83	0	2	0	#NULL!	2	#NULL!	2	2	#NULL!	0
1476	#NULL!	2	2	50.29	0	#NULL!	50.29	2	5	2	1	77	2	#NULL!	#NULL!	#NULL!	2	1	3	2	0	1	2	1	#NULL!	#NULL!	#NULL!	#NULL!	#NULL!	#NULL!	60	4	2	1	1	13.04	0	1	0	#NULL!	2	1	2	1	#NULL!	1
1477	#NULL!	2	1	68.28	#NULL!	#NULL!	68.28	2	2	1	1	63	1	#NULL!	#NULL!	#NULL!	2	1	3	2	1	1	2	1	1	#NULL!	#NULL!	#NULL!	1	#NULL!	61	4	2	1	1	14.49	1	2	1	#NULL!	2	#NULL!	#NULL!	2	0	0
1478	#NULL!	2	1	73.38	#NULL!	#NULL!	73.38	2	9	2	2	64	1	#NULL!	#NULL!	#NULL!	2	1	4	2	1	1	3	2	1	#NULL!	#NULL!	#NULL!	1	#NULL!	62	4	2	1	1	27.33	1	3	2	#NULL!	2	#NULL!	3	2	#NULL!	1
1479	#NULL!	2	1	16.11	0	#NULL!	16.11	1	5	2	1	44	1	#NULL!	#NULL!	#NULL!	2	1	1	1	0	1	1	1	1	#NULL!	#NULL!	#NULL!	1	#NULL!	64	5	3	1	2	18.37	1	1	0	#NULL!	3	#NULL!	#NULL!	1	0	1
1480	#NULL!	2	2	18.07	0	#NULL!	18.07	1	0	1	2	72	2	#NULL!	#NULL!	#NULL!	2	1	2	1	0	1	1	1	#NULL!	#NULL!	#NULL!	#NULL!	#NULL!	#NULL!	60	4	2	1	1	26.8	0	2	1	#NULL!	1	#NULL!	#NULL!	2	#NULL!	0
1481	#NULL!	2	2	24.93	#NULL!	#NULL!	24.93	1	5	2	1	66	2	#NULL!	#NULL!	#NULL!	2	1	2	1	1	1	2	1	#NULL!	#NULL!	#NULL!	#NULL!	#NULL!	#NULL!	61	4	2	1	1	44.88	1	1	0	#NULL!	3	#NULL!	#NULL!	1	0	1
1482	#NULL!	2	2	53.53	0	#NULL!	53.53	2	6	2	1	58	1	#NULL!	#NULL!	#NULL!	2	2	4	2	0	1	3	2	1	#NULL!	#NULL!	#NULL!	1	#NULL!	60	4	2	1	1	37	0	2	0	#NULL!	3	0	1	1	#NULL!	1
1483	#NULL!	2	2	9.93	0	#NULL!	9.93	1	3	1	2	67	2	#NULL!	#NULL!	#NULL!	2	1	2	1	0	1	1	1	1	#NULL!	#NULL!	#NULL!	2	#NULL!	62	4	2	1	1	10	0	1	0	#NULL!	3	#NULL!	#NULL!	1	#NULL!	0
1484	#NULL!	2	1	68.81	#NULL!	#NULL!	68.81	2	0	1	2	75	2	#NULL!	#NULL!	#NULL!	2	1	3	2	1	1	2	1	#NULL!	#NULL!	#NULL!	#NULL!	#NULL!	#NULL!	62	4	2	1	1	35.2	0	0	1	#NULL!	3	0	0	1	0	0
1485	#NULL!	2	2	59.04	#NULL!	#NULL!	59.04	2	4	1	1	67	2	#NULL!	#NULL!	#NULL!	2	1	4	2	1	1	3	2	#NULL!	#NULL!	#NULL!	#NULL!	#NULL!	#NULL!	62	4	2	1	1	18.23	1	2	0	#NULL!	3	#NULL!	#NULL!	2	0	0
1486	#NULL!	2	1	68.04	#NULL!	#NULL!	68.04	2	5	2	1	70	2	#NULL!	#NULL!	#NULL!	2	1	4	2	1	1	3	2	#NULL!	#NULL!	#NULL!	#NULL!	#NULL!	#NULL!	60	4	2	1	1	13	0	1	0	#NULL!	3	#NULL!	#NULL!	2	#NULL!	1
1487	#NULL!	2	1	45.79	0	#NULL!	45.79	2	0	1	1	70	2	#NULL!	#NULL!	#NULL!	2	1	2	1	0	1	1	1	1	#NULL!	#NULL!	#NULL!	1	#NULL!	64	5	3	1	2	35.9	0	1	2	#NULL!	0	#NULL!	3	2	#NULL!	0
1488	#NULL!	2	1	39.79	#NULL!	#NULL!	39.79	2	5	2	1	67	2	#NULL!	#NULL!	#NULL!	2	1	2	1	2	1	3	2	1	#NULL!	#NULL!	#NULL!	2	#NULL!	60	4	2	1	1	19.02	0	1	0	#NULL!	1	1	0	1	#NULL!	1
1489	#NULL!	2	2	28.48	#NULL!	#NULL!	28.48	1	2.8	#NULL!	1	68	2	#NULL!	#NULL!	#NULL!	2	1	2	1	1	1	2	1	1	#NULL!	#NULL!	#NULL!	2	#NULL!	61	4	2	1	1	30.55	0	1	0	#NULL!	0	#NULL!	#NULL!	2	0	#NULL!
1490	#NULL!	2	1	21.44	#NULL!	#NULL!	21.44	1	1	#NULL!	2	68	2	#NULL!	#NULL!	#NULL!	2	1	2	1	1	1	2	1	#NULL!	#NULL!	#NULL!	#NULL!	#NULL!	#NULL!	61	4	2	1	1	29.63	1	3	0	#NULL!	0	#NULL!	#NULL!	2	0	#NULL!
1491	#NULL!	2	1	43.87	#NULL!	#NULL!	43.87	2	2	1	1	58	1	#NULL!	#NULL!	#NULL!	2	1	3	2	1	1	2	1	1	#NULL!	#NULL!	#NULL!	1	#NULL!	64	5	3	1	2	22.37	1	3	0	#NULL!	1	#NULL!	#NULL!	1	0	0
1492	#NULL!	2	2	29.87	0	#NULL!	29.87	1	5	2	1	60	1	#NULL!	#NULL!	#NULL!	2	1	4	2	0	1	3	2	1	#NULL!	#NULL!	#NULL!	2	#NULL!	61	4	2	1	1	20.3	1	1	0	#NULL!	0	#NULL!	#NULL!	2	0	1
1493	#NULL!	2	2	29.02	#NULL!	#NULL!	29.02	1	5	2	1	61	1	#NULL!	#NULL!	#NULL!	2	1	2	1	1	1	2	1	1	#NULL!	#NULL!	#NULL!	2	#NULL!	61	4	2	1	1	41.79	1	2	0	#NULL!	0	#NULL!	#NULL!	1	#NULL!	1
1494	#NULL!	2	2	35.24	#NULL!	#NULL!	35.24	2	5	2	2	69	2	#NULL!	#NULL!	#NULL!	2	1	4	2	1	1	3	2	#NULL!	#NULL!	#NULL!	#NULL!	#NULL!	#NULL!	61	4	2	1	1	12.55	0	1	0	#NULL!	0	#NULL!	#NULL!	2	#NULL!	1
1495	#NULL!	2	2	25.02	#NULL!	#NULL!	25.02	1	3	1	1	59	1	#NULL!	#NULL!	#NULL!	2	1	2	1	1	1	2	1	1	#NULL!	#NULL!	#NULL!	2	#NULL!	60	4	2	1	1	44.85	1	0	0	#NULL!	0	#NULL!	#NULL!	2	0	0
1496	#NULL!	2	2	51.15	0	#NULL!	51.15	2	0	1	2	62	1	#NULL!	#NULL!	#NULL!	2	1	4	2	0	1	3	2	#NULL!	#NULL!	#NULL!	#NULL!	#NULL!	#NULL!	60	4	2	1	1	11	0	2	0	#NULL!	0	#NULL!	#NULL!	2	#NULL!	0
1497	#NULL!	2	2	51.15	0	#NULL!	51.15	2	0	1	2	62	1	#NULL!	#NULL!	#NULL!	2	1	4	2	0	1	3	2	#NULL!	#NULL!	#NULL!	#NULL!	#NULL!	#NULL!	60	4	2	1	1	11	0	2	0	#NULL!	0	#NULL!	#NULL!	2	#NULL!	0
1498	#NULL!	2	2	18.7	#NULL!	#NULL!	18.7	1	5	#NULL!	1	60	1	#NULL!	#NULL!	#NULL!	2	1	2	1	2	1	3	2	1	#NULL!	#NULL!	#NULL!	1	#NULL!	65	5	3	1	2	19.61	1	1	0	#NULL!	0	#NULL!	#NULL!	2	0	#NULL!
1499	#NULL!	2	2	37.69	#NULL!	#NULL!	37.69	2	6	2	1	49	1	#NULL!	#NULL!	#NULL!	2	1	2	1	1	1	2	1	1	#NULL!	#NULL!	#NULL!	1	#NULL!	64	5	3	1	2	18	0	1	2	#NULL!	0	#NULL!	#NULL!	2	#NULL!	1
1500	#NULL!	2	1	22.89	#NULL!	#NULL!	22.89	1	4	1	2	64	1	#NULL!	#NULL!	#NULL!	2	1	2	1	1	1	2	1	1	#NULL!	#NULL!	#NULL!	2	#NULL!	61	4	2	1	1	36.11	1	0	0	#NULL!	0	#NULL!	#NULL!	2	0	0
1501	#NULL!	2	1	35.6	0	#NULL!	35.6	2	5.1	#NULL!	2	53	1	#NULL!	#NULL!	#NULL!	2	1	2	1	0	1	1	1	1	#NULL!	#NULL!	#NULL!	1	#NULL!	60	4	2	1	1	7.39	0	1	0	#NULL!	0	#NULL!	#NULL!	3	#NULL!	#NULL!
1502	#NULL!	2	2	37.39	#NULL!	#NULL!	37.39	2	0	1	1	78	2	1	#NULL!	#NULL!	2	1	2	1	1	1	2	1	#NULL!	1	#NULL!	#NULL!	#NULL!	#NULL!	52	2	1	0	#NULL!	54.5	0	1	0	#NULL!	1	0	0	1	0	0
1503	#NULL!	2	1	90.27	#NULL!	#NULL!	90.27	2	7	2	1	41	1	#NULL!	#NULL!	#NULL!	2	1	2	1	1	1	2	1	#NULL!	#NULL!	#NULL!	#NULL!	#NULL!	#NULL!	60	4	2	1	1	5.36	0	1	0	#NULL!	0	#NULL!	3	2	#NULL!	1
1504	#NULL!	2	2	23.1	#NULL!	#NULL!	23.1	1	0	1	1	62	1	#NULL!	#NULL!	#NULL!	2	1	4	2	1	1	3	2	#NULL!	#NULL!	#NULL!	#NULL!	#NULL!	#NULL!	64	5	3	1	2	5	0	1	0	#NULL!	0	#NULL!	#NULL!	1	#NULL!	0
1505	#NULL!	2	2	10.01	0	#NULL!	10.01	1	3	1	1	69	2	#NULL!	#NULL!	#NULL!	2	1	2	1	0	1	1	1	1	#NULL!	#NULL!	#NULL!	2	#NULL!	60	4	2	1	1	46.75	1	1	0	#NULL!	0	#NULL!	#NULL!	2	0	0
1506	#NULL!	2	1	21.14	0	#NULL!	21.14	1	6	#NULL!	1	60	1	#NULL!	#NULL!	#NULL!	2	1	2	1	0	1	1	1	1	#NULL!	#NULL!	#NULL!	1	#NULL!	60	4	2	1	1	27.63	0	1	0	#NULL!	0	4	3	2	#NULL!	#NULL!
1507	#NULL!	2	2	23.81	0	#NULL!	23.81	1	2	1	2	70	2	#NULL!	#NULL!	#NULL!	2	1	2	1	0	1	1	1	#NULL!	#NULL!	#NULL!	#NULL!	#NULL!	#NULL!	61	4	2	1	1	31.38	1	1	0	#NULL!	4	#NULL!	#NULL!	2	0	0
1508	#NULL!	2	1	54.86	0	#NULL!	54.86	2	4	1	2	68	2	#NULL!	#NULL!	#NULL!	2	2	2	1	0	1	1	1	#NULL!	#NULL!	#NULL!	#NULL!	#NULL!	#NULL!	60	4	2	1	1	12.42	0	0	0	#NULL!	4	#NULL!	#NULL!	2	#NULL!	0
1509	#NULL!	2	2	15.99	0	#NULL!	15.99	1	4	1	2	58	1	#NULL!	#NULL!	#NULL!	2	1	2	1	0	1	1	1	#NULL!	#NULL!	#NULL!	#NULL!	#NULL!	#NULL!	60	4	2	1	1	15.8	0	1	0	#NULL!	0	#NULL!	#NULL!	2	#NULL!	0
1510	#NULL!	2	2	26.23	#NULL!	#NULL!	26.23	1	5	2	1	66	2	#NULL!	#NULL!	#NULL!	2	1	2	1	2	1	3	2	#NULL!	#NULL!	#NULL!	#NULL!	#NULL!	#NULL!	62	4	2	1	1	29	0	0	2	#NULL!	0	#NULL!	#NULL!	2	#NULL!	1
1511	#NULL!	2	2	21.45	0	#NULL!	21.45	1	3	1	1	61	1	#NULL!	#NULL!	#NULL!	2	1	2	1	0	1	1	1	1	#NULL!	#NULL!	#NULL!	1	#NULL!	60	4	2	1	1	11.24	0	0	0	#NULL!	0	#NULL!	#NULL!	2	#NULL!	0
1512	#NULL!	2	2	49.04	0	#NULL!	49.04	2	5	2	1	48	1	#NULL!	#NULL!	#NULL!	2	2	3	2	0	1	2	1	#NULL!	#NULL!	#NULL!	#NULL!	#NULL!	#NULL!	60	4	2	1	1	19.1	0	2	1	#NULL!	0	1	0	1	#NULL!	1
1513	#NULL!	2	1	52.25	#NULL!	#NULL!	52.25	2	0	1	2	74	2	#NULL!	#NULL!	#NULL!	2	1	4	2	1	1	3	2	1	#NULL!	#NULL!	#NULL!	1	#NULL!	62	4	2	1	1	13.2	0	1	0	#NULL!	0	#NULL!	1	2	#NULL!	0
1514	#NULL!	2	1	17.31	#NULL!	#NULL!	17.31	1	5	2	2	66	2	#NULL!	#NULL!	#NULL!	2	2	2	1	1	1	2	1	1	#NULL!	#NULL!	#NULL!	1	#NULL!	59.4	4	2	1	1	76.88	1	1	0	#NULL!	0	0	1	1	#NULL!	1
1515	#NULL!	2	1	18.27	#NULL!	#NULL!	18.27	1	0	1	1	53	1	#NULL!	#NULL!	#NULL!	2	1	2	1	2	1	3	2	#NULL!	#NULL!	#NULL!	#NULL!	#NULL!	#NULL!	60	4	2	1	1	13.2	0	1	0	#NULL!	0	2	#NULL!	2	#NULL!	0
1516	#NULL!	2	1	35.08	0	#NULL!	35.08	2	0	1	2	60	1	#NULL!	#NULL!	#NULL!	2	1	4	2	0	1	3	2	1	#NULL!	#NULL!	#NULL!	1	#NULL!	60	4	2	1	1	55.8	0	2	1	#NULL!	0	0	0	1	0	0
1517	#NULL!	2	2	#NULL!	#NULL!	#NULL!	#NULL!	#NULL!	#NULL!	#NULL!	2	73	2	1	0	0	2	1	2	1	1	1	2	2	1	#NULL!	#NULL!	6	2	#NULL!	60	4	2	1	1	60	0	#NULL!	#NULL!	#NULL!	#NULL!	#NULL!	#NULL!		0	#NULL!
1518	#NULL!	2	2	#NULL!	#NULL!	#NULL!	#NULL!	#NULL!	#NULL!	#NULL!	2	77	1	0	0	0	2	1	2	1	1	1	2	2	1	#NULL!	#NULL!	3	1	#NULL!	59.92	4	2	1	1	44	0	#NULL!	#NULL!	#NULL!	#NULL!	#NULL!	#NULL!		0	#NULL!
1519	#NULL!	2	2	#NULL!	#NULL!	#NULL!	#NULL!	#NULL!	#NULL!	#NULL!	2	71	1	0	0	0	2	1	3	2	1	1	3	2	1	#NULL!	#NULL!	5	2	#NULL!	63.86	5	3	1	2	53	0	#NULL!	#NULL!	#NULL!	#NULL!	#NULL!	#NULL!		0	#NULL!
1520	#NULL!	2	2	#NULL!	#NULL!	#NULL!	#NULL!	#NULL!	#NULL!	#NULL!	2	74	1	0	0	0	2	1	3	2	1	1	3	2	1	#NULL!	#NULL!	2	1	#NULL!	60	4	2	1	1	41	1	#NULL!	#NULL!	#NULL!	#NULL!	#NULL!	#NULL!		#NULL!	#NULL!
1521	#NULL!	2	2	#NULL!	#NULL!	#NULL!	#NULL!	#NULL!	#NULL!	#NULL!	1	77	2	0	1	1	2	1	3	2	1	2	3	2	1	0	#NULL!	6	2	#NULL!	56	3	1	0	#NULL!	10	1	#NULL!	#NULL!	#NULL!	#NULL!	#NULL!	#NULL!		#NULL!	#NULL!
1522	#NULL!	2	#NULL!	#NULL!	#NULL!	#NULL!	21	1	3	1	2	62	1	0	0	0	2	1	1	1	1	1	1	1	1	#NULL!	#NULL!	5	2	1	60	4	2	1	1	51	0	#NULL!	#NULL!	#NULL!	#NULL!	#NULL!	#NULL!		#NULL!	0
1523	#NULL!	2	#NULL!	#NULL!	#NULL!	#NULL!	#NULL!	#NULL!	#NULL!	#NULL!	1	71	2	1	1	1	2	1	3	2	1	1	3	2	1	#NULL!	#NULL!	5	2	#NULL!	61.5	4	2	1	1	65	0	#NULL!	#NULL!	#NULL!	#NULL!	#NULL!	#NULL!		#NULL!	#NULL!
1524	#NULL!	2	#NULL!	#NULL!	#NULL!	#NULL!	#NULL!	#NULL!	#NULL!	#NULL!	1	65	2	1	1	1	2	1	3	2	1	1	3	2	1	#NULL!	#NULL!	6	2	#NULL!	63	4	3	1	2	15	1	#NULL!	#NULL!	#NULL!	#NULL!	#NULL!	#NULL!		#NULL!	#NULL!
1525	#NULL!	2	#NULL!	#NULL!	#NULL!	#NULL!	#NULL!	#NULL!	#NULL!	#NULL!	1	83	2	1	0	0	2	1	3	2	0	1	2	2	1	#NULL!	#NULL!	3	1	#NULL!	59.45	4	2	1	1	42	0	#NULL!	#NULL!	#NULL!	#NULL!	#NULL!	#NULL!		0	#NULL!
1526	#NULL!	2	#NULL!	#NULL!	#NULL!	#NULL!	#NULL!	#NULL!	#NULL!	#NULL!	1	57	2	0	1	1	2	1	2	1	0	1	2	2	1	0	#NULL!	3	1	#NULL!	56	3	1	0	#NULL!	4	1	#NULL!	#NULL!	#NULL!	#NULL!	#NULL!	#NULL!		#NULL!	#NULL!
1527	#NULL!	1	#NULL!	#NULL!	#NULL!	#NULL!	44	2	6	#NULL!	1	64	2	0	1	1	2	1	3	2	1	1	3	2	1	#NULL!	#NULL!	8	2	#NULL!	62.4	4	3	1	2	77	0	#NULL!	#NULL!	#NULL!	#NULL!	#NULL!	#NULL!		0	#NULL!
1528	#NULL!	1	#NULL!	#NULL!	#NULL!	#NULL!	#NULL!	#NULL!	#NULL!	#NULL!	1	66	1	0	1	0	2	1	1	1	1	1	1	1	1	1	#NULL!	4	1	2	45	1	1	0	#NULL!	26	1	#NULL!	#NULL!	#NULL!	#NULL!	#NULL!	#NULL!		#NULL!	#NULL!
1529	#NULL!	1	#NULL!	#NULL!	#NULL!	#NULL!	#NULL!	#NULL!	#NULL!	#NULL!	1	74	2	0	1	1	2	1	2	1	0	1	2	2	1	#NULL!	#NULL!	3	1	#NULL!	60	4	2	1	1	55	0	#NULL!	#NULL!	#NULL!	#NULL!	#NULL!	#NULL!		0	#NULL!
1530	#NULL!	1	#NULL!	#NULL!	#NULL!	#NULL!	#NULL!	#NULL!	#NULL!	#NULL!	2	79	1	1	0	0	2	1	3	2	0	1	2	2	1	#NULL!	#NULL!	5	2	1	59.4	4	2	1	1	11	1	#NULL!	#NULL!	#NULL!	#NULL!	#NULL!	#NULL!		#NULL!	#NULL!
1531	#NULL!	1	#NULL!	#NULL!	#NULL!	#NULL!	#NULL!	#NULL!	#NULL!	#NULL!	2	62	1	0	0	0	2	1	3	2	2	1	3	2	1	#NULL!	#NULL!	4	1	#NULL!	61.5	4	2	1	1	71	0	#NULL!	#NULL!	#NULL!	#NULL!	#NULL!	#NULL!		0	#NULL!
1532	#NULL!	2	#NULL!	#NULL!	#NULL!	#NULL!	#NULL!	#NULL!	#NULL!	#NULL!	2	64	1	0	0	0	2	1	1	1	1	1	1	1	1	#NULL!	#NULL!	5	2	1	60	4	2	1	1	70	0	#NULL!	#NULL!	#NULL!	#NULL!	#NULL!	#NULL!		0	#NULL!
1533	#NULL!	2	#NULL!	#NULL!	#NULL!	#NULL!	#NULL!	#NULL!	#NULL!	#NULL!	1	75	2	0	1	0	2	1	2	1	1	1	2	2	1	#NULL!	#NULL!	5	2	#NULL!	60	4	2	1	1	4	0	#NULL!	#NULL!	#NULL!	#NULL!	#NULL!	#NULL!		0	#NULL!
1534	#NULL!	2	#NULL!	#NULL!	#NULL!	#NULL!	#NULL!	#NULL!	#NULL!	#NULL!	2	59	1	1	0	0	2	1	4	2	0	1	4	2	1	1	#NULL!	3	1	#NULL!	63	4	3	1	2	10	1	#NULL!	#NULL!	#NULL!	#NULL!	#NULL!	#NULL!		#NULL!	#NULL!
1535	#NULL!	2	#NULL!	#NULL!	#NULL!	#NULL!	#NULL!	#NULL!	#NULL!	#NULL!	2	65	2	0	0	0	2	1	2	1	1	1	2	2	1	#NULL!	#NULL!	2	1	1	60.2	4	2	1	1	54	0	#NULL!	#NULL!	#NULL!	#NULL!	#NULL!	#NULL!		0	#NULL!
1536	#NULL!	2	#NULL!	#NULL!	#NULL!	#NULL!	#NULL!	#NULL!	#NULL!	#NULL!	2	61	1	0	0	0	2	1	2	1	1	1	2	2	1	#NULL!	#NULL!	5	2	#NULL!	60	4	2	1	1	67	0	#NULL!	#NULL!	#NULL!	#NULL!	#NULL!	#NULL!		0	#NULL!
1537	#NULL!	2	#NULL!	#NULL!	#NULL!	#NULL!	#NULL!	#NULL!	#NULL!	#NULL!	2	65	2	1	0	0	2	1	3	2	1	1	3	2	1	#NULL!	#NULL!	2	1	#NULL!	60	4	2	1	1	55	0	#NULL!	#NULL!	#NULL!	#NULL!	#NULL!	#NULL!		0	#NULL!
1538	#NULL!	2	#NULL!	#NULL!	#NULL!	#NULL!	#NULL!	#NULL!	#NULL!	#NULL!	1	82	1	0	1	1	2	1	2	1	1	1	2	2	1	#NULL!	#NULL!	2	1	1	62	4	2	1	1	54	0	#NULL!	#NULL!	#NULL!	#NULL!	#NULL!	#NULL!		0	#NULL!
1539	#NULL!	2	#NULL!	#NULL!	#NULL!	#NULL!	#NULL!	#NULL!	#NULL!	#NULL!	2	69	2	1	0	0	2	1	2	1	0	1	2	2	1	1	#NULL!	2	1	#NULL!	52.2	2	1	0	#NULL!	56	0	#NULL!	#NULL!	#NULL!	#NULL!	#NULL!	#NULL!		0	#NULL!
1540	#NULL!	2	#NULL!	#NULL!	#NULL!	#NULL!	#NULL!	#NULL!	#NULL!	#NULL!	2	74	2	1	1	0	2	1	2	1	2	1	3	2	1	#NULL!	#NULL!	3	1	#NULL!	60	4	2	1	1	16	0	#NULL!	#NULL!	#NULL!	#NULL!	#NULL!	#NULL!		0	#NULL!
1541	#NULL!	2	#NULL!	#NULL!	#NULL!	#NULL!	#NULL!	#NULL!	#NULL!	#NULL!	2	69	1	1	0	0	2	1	1	1	0	1	1	1	1	#NULL!	#NULL!	2	1	#NULL!	60.9	4	2	1	1	42	0	#NULL!	#NULL!	#NULL!	#NULL!	#NULL!	#NULL!		0	#NULL!
1542	#NULL!	2	#NULL!	#NULL!	#NULL!	#NULL!	#NULL!	#NULL!	#NULL!	#NULL!	1	62	2	0	0	0	2	1	2	1	0	1	2	2	1	#NULL!	#NULL!	8	2	#NULL!	60	4	2	1	1	26	1	#NULL!	#NULL!	#NULL!	#NULL!	#NULL!	#NULL!		#NULL!	#NULL!
1543	#NULL!	2	#NULL!	#NULL!	#NULL!	#NULL!	#NULL!	#NULL!	#NULL!	#NULL!	1	60	2	0	1	0	2	1	1	1	0	1	1	1	1	#NULL!	#NULL!	7	2	#NULL!	59.4	4	2	1	1	50	1	#NULL!	#NULL!	#NULL!	#NULL!	#NULL!	#NULL!		#NULL!	#NULL!
1544	#NULL!	2	#NULL!	#NULL!	#NULL!	#NULL!	#NULL!	#NULL!	#NULL!	#NULL!	2	76	1	0	0	0	2	1	3	2	1	1	3	2	1	1	#NULL!	2	1	1	55.8	3	1	0	#NULL!	59	0	#NULL!	#NULL!	#NULL!	#NULL!	#NULL!	#NULL!		0	#NULL!
1545	#NULL!	2	#NULL!	#NULL!	#NULL!	#NULL!	#NULL!	#NULL!	#NULL!	#NULL!	1	75	2	1	0	0	2	1	1	1	2	1	3	2	1	#NULL!	#NULL!	5	2	#NULL!	60	4	2	1	1	57	0	#NULL!	#NULL!	#NULL!	#NULL!	#NULL!	#NULL!		#NULL!	#NULL!
1546	#NULL!	2	#NULL!	#NULL!	#NULL!	#NULL!	#NULL!	#NULL!	#NULL!	#NULL!	1	65	2	1	1	1	2	1	4	2	1	1	4	2	1	#NULL!	#NULL!	4	1	#NULL!	59.4	4	2	1	1	10	1	#NULL!	#NULL!	#NULL!	#NULL!	#NULL!	#NULL!		#NULL!	#NULL!
1547	#NULL!	2	#NULL!	#NULL!	#NULL!	#NULL!	#NULL!	#NULL!	#NULL!	#NULL!	2	71	1	0	0	0	2	1	1	1	2	1	3	2	1	#NULL!	#NULL!	5	2	#NULL!	60.2	4	2	1	1	60	0	#NULL!	#NULL!	#NULL!	#NULL!	#NULL!	#NULL!		0	#NULL!
1548	#NULL!	2	#NULL!	#NULL!	#NULL!	#NULL!	#NULL!	#NULL!	#NULL!	#NULL!	1	68	2	1	1	1	2	1	3	2	1	1	3	2	1	#NULL!	#NULL!	2	1	1	60	4	2	1	1	22	1	#NULL!	#NULL!	#NULL!	#NULL!	#NULL!	#NULL!		#NULL!	#NULL!
1549	#NULL!	2	#NULL!	#NULL!	#NULL!	#NULL!	#NULL!	#NULL!	#NULL!	#NULL!	1	71	1	0	1	1	2	1	4	2	0	1	4	2	1	#NULL!	#NULL!	5	2	#NULL!	62	4	2	1	1	41	0	#NULL!	#NULL!	#NULL!	#NULL!	#NULL!	#NULL!		0	#NULL!
1550	#NULL!	2	#NULL!	#NULL!	#NULL!	#NULL!	#NULL!	#NULL!	#NULL!	#NULL!	2	72	2	0	0	0	2	1	2	1	0	1	2	2	1	#NULL!	#NULL!	4	1	#NULL!	60	4	2	1	1	32	1	#NULL!	#NULL!	#NULL!	#NULL!	#NULL!	#NULL!		#NULL!	#NULL!
1551	#NULL!	2	#NULL!	#NULL!	#NULL!	#NULL!	#NULL!	#NULL!	#NULL!	#NULL!	1	77	1	1	1	1	2	1	3	2	0	1	2	2	1	#NULL!	#NULL!	2	1	1	60	4	2	1	1	54	0	#NULL!	#NULL!	#NULL!	#NULL!	#NULL!	#NULL!		0	#NULL!
1552	#NULL!	2	#NULL!	#NULL!	#NULL!	#NULL!	#NULL!	#NULL!	#NULL!	#NULL!	1	75	1	0	0	0	2	1	3	2	2	2	3	2	1	0	#NULL!	4	1	#NULL!	56	3	1	0	#NULL!	2	1	#NULL!	#NULL!	#NULL!	#NULL!	#NULL!	#NULL!		#NULL!	#NULL!
1553	#NULL!	2	#NULL!	#NULL!	#NULL!	#NULL!	#NULL!	#NULL!	#NULL!	#NULL!	1	72	2	0	1	1	2	1	3	2	1	1	3	2	1	#NULL!	#NULL!	7	2	#NULL!	60	4	2	1	1	11	1	#NULL!	#NULL!	#NULL!	#NULL!	#NULL!	#NULL!		#NULL!	#NULL!
1554	#NULL!	2	#NULL!	#NULL!	#NULL!	#NULL!	#NULL!	#NULL!	#NULL!	#NULL!	2	73	1	0	0	0	2	1	3	2	0	1	2	2	1	#NULL!	#NULL!	7	2	#NULL!	60	4	2	1	1	49	0	#NULL!	#NULL!	#NULL!	#NULL!	#NULL!	#NULL!		0	#NULL!
1555	#NULL!	2	#NULL!	#NULL!	#NULL!	#NULL!	#NULL!	#NULL!	#NULL!	#NULL!	1	74	1	1	1	1	2	1	2	1	1	1	2	2	1	#NULL!	#NULL!	4	1	1	64	5	3	1	2	60	0	#NULL!	#NULL!	#NULL!	#NULL!	#NULL!	#NULL!		#NULL!	#NULL!
1556	#NULL!	2	#NULL!	#NULL!	#NULL!	#NULL!	#NULL!	#NULL!	#NULL!	#NULL!	2	58	2	1	0	0	2	1	1	1	0	1	1	1	1	#NULL!	#NULL!	6	2	#NULL!	60	4	2	1	1	55	0	#NULL!	#NULL!	#NULL!	#NULL!	#NULL!	#NULL!		0	#NULL!
1557	#NULL!	2	#NULL!	#NULL!	#NULL!	#NULL!	#NULL!	#NULL!	#NULL!	#NULL!	1	76	2	0	1	0	2	1	4	2	1	1	4	2	1	#NULL!	#NULL!	6	2	#NULL!	60	4	2	1	1	15	1	#NULL!	#NULL!	#NULL!	#NULL!	#NULL!	#NULL!		#NULL!	#NULL!
1558	#NULL!	2	#NULL!	#NULL!	#NULL!	#NULL!	#NULL!	#NULL!	#NULL!	#NULL!	1	55	2	1	0	0	2	1	3	2	0	1	2	2	1	#NULL!	#NULL!	3	1	#NULL!	60	4	2	1	1	10	1	#NULL!	#NULL!	#NULL!	#NULL!	#NULL!	#NULL!		#NULL!	#NULL!
1559	#NULL!	2	#NULL!	#NULL!	#NULL!	#NULL!	#NULL!	#NULL!	#NULL!	#NULL!	1	73	2	0	1	1	2	1	3	2	1	1	3	2	1	#NULL!	#NULL!	3	1	#NULL!	60	4	2	1	1	61	0	#NULL!	#NULL!	#NULL!	#NULL!	#NULL!	#NULL!		0	#NULL!
1560	#NULL!	2	#NULL!	#NULL!	#NULL!	#NULL!	#NULL!	#NULL!	#NULL!	#NULL!	1	88	2	0	0	0	2	1	4	2	1	1	4	2	1	#NULL!	#NULL!	1	1	1	59.4	4	2	1	1	12	1	#NULL!	#NULL!	#NULL!	#NULL!	#NULL!	#NULL!		#NULL!	#NULL!
1561	#NULL!	2	#NULL!	#NULL!	#NULL!	#NULL!	#NULL!	#NULL!	#NULL!	#NULL!	2	66	1	1	0	0	2	1	2	1	1	1	2	2	1	#NULL!	#NULL!	3	1	#NULL!	60	4	2	1	1	52	0	#NULL!	#NULL!	#NULL!	#NULL!	#NULL!	#NULL!		0	#NULL!
1562	#NULL!	2	#NULL!	#NULL!	#NULL!	#NULL!	#NULL!	#NULL!	#NULL!	#NULL!	1	80	1	1	1	1	2	1	4	2	0	1	4	2	1	1	#NULL!	4	1	1	63	4	3	1	2	5	1	#NULL!	#NULL!	#NULL!	#NULL!	#NULL!	#NULL!		#NULL!	#NULL!
1563	#NULL!	2	#NULL!	#NULL!	#NULL!	#NULL!	#NULL!	#NULL!	#NULL!	#NULL!	1	56	1	1	1	1	2	1	1	2	0	1	4	2	1	0	#NULL!	9	2	#NULL!	57.6	3	1	0	#NULL!	16	1	#NULL!	#NULL!	#NULL!	#NULL!	#NULL!	#NULL!		0	#NULL!
1564	#NULL!	2	#NULL!	#NULL!	#NULL!	#NULL!	#NULL!	#NULL!	#NULL!	#NULL!	2	66	1	1	0	0	2	1	1	1	1	1	1	1	1	#NULL!	#NULL!	7	2	#NULL!	60	4	2	1	1	59	0	#NULL!	#NULL!	#NULL!	#NULL!	#NULL!	#NULL!		0	#NULL!
1565	#NULL!	2	#NULL!	#NULL!	#NULL!	#NULL!	#NULL!	#NULL!	#NULL!	#NULL!	1	73	2	0	1	0	2	1	2	1	0	1	2	2	1	1	#NULL!	5	2	#NULL!	58	3	1	0	#NULL!	17	1	#NULL!	#NULL!	#NULL!	#NULL!	#NULL!	#NULL!		#NULL!	#NULL!
1566	#NULL!	2	#NULL!	#NULL!	#NULL!	#NULL!	#NULL!	#NULL!	#NULL!	#NULL!	1	66	1	0	1	1	2	1	3	2	2	1	3	2	1	1	#NULL!	4	1	#NULL!	50.4	1	1	0	#NULL!	28	1	#NULL!	#NULL!	#NULL!	#NULL!	#NULL!	#NULL!		#NULL!	#NULL!
