# Supplementary material for: High-Dose Radiotherapy for Cervical and Upper Thoracic Esophageal Cancer: A Multicenter Real-World Study with Dose-Benefit Exploration
Source: Research Square preprint supplement (doi:10.21203/rs.3.rs-8195163/v1), 2025-12-16
Supplement: Supplementary file 2 [file bcd878d7301a2dd188187bb9.xlsx]

## Sheet: raw data for cervical ESCA
ID2	facultyNUM	放疗方式，13DCRT2IMRT	照射范围，2IF1ENI	GTVp	GTVn	总体积	新总体积2分类	病变长度	病变长度2分类	化疗方案（如患者期间使用化疗方案不同，请注	single1ordouble2agent	chemotherapycycle14andbelow4	放射性食管炎级别（RTOG分级标准）	二分类食管炎	放射气管炎级别	二分类气管炎	骨髓抑制级别	复发（1原发，2区域淋巴结，3远处转移，4，腹腔	远处转移部位（1肺及胸膜，2肝，3骨，4脑，5其	合并疗效评价，1ORR，2SD或PD	LCDF	LCDF状态	远处转移状态	gender	agegroup	KPSgroup1below900well	cTstage（5T4B）	groupedTstage	cNstage	groupedNstage	TNMstage	groupedTNMstage	chemotherapy	psmlowvshigh59.96	radiationDOSE60	OS	OSstatus	GTV3grouped	smoking1yes	drinking1yes	pathologytype1SCC2others	filter_$
1	8	2	1	#NULL!	#NULL!	11	1	3.7	1	多西+洛铂周疗	2	#NULL!	0	#NULL!	1	#NULL!	#NULL!	#NULL!	#NULL!	1	108	0	#NULL!	1	1	0	2	1	0	1	1	1	1	1	0	108	0	2	1	1	1	0
2	2	1	1	#NULL!	#NULL!	#NULL!	#NULL!	#NULL!	#NULL!	替加氟+奥沙利铂	2	1	0	#NULL!	0	#NULL!	#NULL!	1	#NULL!	1	32	0	#NULL!	1	1	0	4	2	0	1	4	2	1	0	1	38	1	3	1	1	1	#NULL!
3	8	2	1	#NULL!	#NULL!	#NULL!	#NULL!	#NULL!	#NULL!	多西紫杉醇+顺铂	2	#NULL!	#NULL!	#NULL!	#NULL!	#NULL!	#NULL!	1	#NULL!		32	0	#NULL!	1	2	1	4	2	0	1	4	2	1	0	1	32	1	3	1	1	2	#NULL!
4	1	2	1	#NULL!	#NULL!	#NULL!	#NULL!	#NULL!	#NULL!	顺铂	1	1	1	1	0	#NULL!	2	2	1		15	0	#NULL!	1	1	0	4	2	2	2	3	2	1	0	1	15	1	3	1	1	1	#NULL!
5	3	2	2	#NULL!	#NULL!	#NULL!	#NULL!	#NULL!	#NULL!		#NULL!	#NULL!	3	2	0	#NULL!	1	#NULL!	#NULL!		6	0	0	1	2	1	3	2	2	2	3	2	0	0	1	6	0	2	1	1	1	#NULL!
6	5	2	2	#NULL!	#NULL!	#NULL!	#NULL!	#NULL!	#NULL!		#NULL!	#NULL!	0	#NULL!	0	#NULL!	#NULL!	2	#NULL!	2	27	0	#NULL!	1	2	0	4	2	2	2	4	2	0	0	1	27	1	2	1	1	1	#NULL!
7	8	2	2	#NULL!	#NULL!	#NULL!	#NULL!	#NULL!	#NULL!	PF	1	1	1	1	0	#NULL!	0	#NULL!	#NULL!	1	31	0	#NULL!	1	2	1	4	2	2	2	3	2	1	0	1	31	1	2	1	1	1	#NULL!
8	6	2	2	#NULL!	#NULL!	#NULL!	#NULL!	#NULL!	#NULL!		2	#NULL!	2	1	2	#NULL!	#NULL!	#NULL!	#NULL!	1	65	0	0	1	2	0	3	2	0	1	2	1	1	0	1	65	0	2	1	1	1	#NULL!
9	3	2	2	#NULL!	#NULL!	#NULL!	#NULL!	#NULL!	#NULL!	雷替+洛铂	1	#NULL!	#NULL!	#NULL!	#NULL!	#NULL!	#NULL!	#NULL!	#NULL!		49	0	0	1	1	0	4	2	2	2	4	2	1	0	1	49	1	3	1	1	2	#NULL!
10	1	2	2	49.4939	32.24	81.7339	2	3	1		1	1	3	2	0	#NULL!	3	2	#NULL!	1	10	1	#NULL!	1	1	0	4	2	3	2	4	2	1	0	1	19	1	2	1	1	1	0
11	3	2	2	#NULL!	#NULL!	#NULL!	#NULL!	#NULL!	#NULL!		2	#NULL!	2	1	0	#NULL!	0	#NULL!	#NULL!		30	0	#NULL!	1	2	0	3	2	2	2	4	2	1	0	1	30	0	2	1	1	1	#NULL!
12	8	1	2	#NULL!	#NULL!	#NULL!	#NULL!	#NULL!	#NULL!		1	#NULL!	0	#NULL!	0	#NULL!	#NULL!	2	#NULL!		30	1	#NULL!	1	1	1	4	2	1	2	4	2	1	0	1	36	1	3	1	1	1	#NULL!
13	6	2	1	23.3356	#NULL!	23.3356	1	4	1		2	1	2	1	1	#NULL!	2	#NULL!	#NULL!	1	25	0	0	1	1	0	4	2	1	2	4	2	1	0	1	25	0	2	1	1	1	0
14	1	1	2	87.5567	#NULL!	87.5567	2	8.6	2		2	1	1	1	0	#NULL!	2	#NULL!	#NULL!	2	24	1	#NULL!	1	1	0	4	2	2	2	4	2	1	0	1	28	1	3	1	1	2	1
15	3	2	2	#NULL!	#NULL!	#NULL!	#NULL!	#NULL!	#NULL!	雷替曲赛+顺铂	2	#NULL!	#NULL!	#NULL!	#NULL!	#NULL!	#NULL!	#NULL!	#NULL!		21	0	#NULL!	1	1	1	2	1	3	2	3	2	1	0	1	97	1	2	1	1	1	#NULL!
16	3	2	2	48.6138	0	48.6138	2	3	1		2	1	1	1	0	#NULL!	3	#NULL!	#NULL!	1	61	0	0	1	1	0	3	2	0	1	2	1	1	0	1	61	0	2	1	1	2	0
17	6	2	2	7.31808	8.86	16.1781	1	5	2		2	1	0	#NULL!	0	#NULL!	4	3	#NULL!	1	9	1	#NULL!	1	2	0	3	2	1	2	3	2	1	0	1	24	1	2	1	1	2	1
18	3	2	2	16	0	16	1	3	1		2	1	0	#NULL!	0	#NULL!	3	#NULL!	#NULL!	1	75	0	0	2	1	0	2	1	0	1	1	1	1	0	1	75	0	3	1	1	2	0
19	1	2	2	18.2192	#NULL!	18.2192	1	3.5	1		2	1	2	1	1	#NULL!	2	#NULL!	#NULL!	1	36	0	0	2	1	0	3	2	0	1	2	1	1	0	1	36	0	3	1	1	2	0
20	3	2	2	#NULL!	#NULL!	31	2	4	1	雷替曲赛+顺铂	#NULL!	#NULL!	#NULL!	#NULL!	#NULL!	#NULL!	#NULL!	#NULL!	#NULL!		17	0	0	1	1	1	2	1	2	2	3	2	1	0	1	17	1	2	1	1	1	0
21	4	1	2	#NULL!	#NULL!	33	2	11	2	紫杉醇+奈达铂	2	2	1	1	0	#NULL!	1	#NULL!	#NULL!		9	0	0	1	1	0	3	2	2	2	3	2	1	0	1	9	0	2	0	0	1	1
22	3	2	2	#NULL!	#NULL!	44	2	6	2	PF	2	2	2	1	0	#NULL!	2	#NULL!	#NULL!	1	26	0	#NULL!	2	1	0	3	2	1	2	3	2	1	0	1	26	0	2	0	1	2	1
23	3	2	2	#NULL!	#NULL!	#NULL!	#NULL!	#NULL!	#NULL!	多西洛铂	2	2	2	1	0	#NULL!	#NULL!	#NULL!	#NULL!	1	23	0	#NULL!	1	1	0	4	2	1	2	4	2	1	0	1	23	1	2	1	1	1	#NULL!
24	4	2	2	#NULL!	#NULL!	24	2	4	1	紫杉醇+奈达铂	#NULL!	#NULL!	2	1	0	#NULL!	0	3	1	2	16	1	#NULL!	1	1	1	3	2	2	2	3	2	1	0	1	20	0	2	1	1	1	0
25	8	2	2	#NULL!	#NULL!	21	1	3	1	TP	#NULL!	1	0	#NULL!	0	#NULL!	#NULL!	#NULL!	#NULL!	2	24	0	#NULL!	1	2	0	3	2	1	2	3	2	1	0	1	24	1	2	1	1	1	0
26	1	2	2	#NULL!	#NULL!	27	2	5	2		1	#NULL!	0	#NULL!	0	#NULL!	0	#NULL!	#NULL!		6	0	0	1	2	1	4	2	2	2	3	2	1	0	1	6	0	2	1	1	1	1
27	3	2	2	#NULL!	#NULL!	31	2	3.8	1		#NULL!	1	0	#NULL!	0	#NULL!	#NULL!	#NULL!	2	2	22	0	#NULL!	1	1	0	3	2	1	2	3	2	0	0	1	22	1	2	1	1	1	0
28	5	2	2	#NULL!	#NULL!	23	1	4	1		2	#NULL!	0	#NULL!	0	#NULL!	0	2	#NULL!	1	26	0	#NULL!	1	1	1	4	2	2	2	3	2	1	0	1	26	1	2	1	1	1	0
29	6	2	2	#NULL!	#NULL!	#NULL!	#NULL!	#NULL!	#NULL!		1	#NULL!	0	#NULL!	0	#NULL!	3	#NULL!	#NULL!		8	0	0	1	1	1	2	1	0	1	2	1	1	0	1	8	1	3	1	1	1	#NULL!
30	7	2	2	18	16.9331	24	2	6	2		2	1	1	1	0	#NULL!	2	#NULL!	#NULL!	1	63	0	0	2	1	0	2	1	1	2	3	2	1	0	1	63	0	2	1	1	2	1
31	8	2	2	4.3809	0	4.3809	1	5	2		2	1	1	1	0	#NULL!	1	#NULL!	#NULL!	1	85	0	#NULL!	2	2	0	1	1	0	1	1	1	1	0	1	85	0	3	1	1	2	1
32	1	1	2	#NULL!	#NULL!	28	2	6	2		#NULL!	#NULL!	1	1	0	#NULL!	0	#NULL!	#NULL!	1	5	0	0	1	1	1	4	2	2	2	3	2	0	0	1	5	0	2	1	1	1	1
33	1	2	2	14.8495	#NULL!	14.8495	1	4	1		2	#NULL!	0	#NULL!	0	#NULL!	0	#NULL!	#NULL!	2	34	0	#NULL!	1	2	0	3	2	0	1	4	2	1	0	1	34	0	2	1	1	2	0
34	4	2	2	#NULL!	#NULL!	#NULL!	#NULL!	#NULL!	#NULL!	紫杉醇+奈达铂	#NULL!	1	2	1	0	#NULL!	2	1	#NULL!		13	0	#NULL!	1	1	0	4	2	2	2	4	2	1	0	1	13	0	2	1	1	1	#NULL!
35	5	2	2	#NULL!	#NULL!	#NULL!	#NULL!	#NULL!	#NULL!	白紫+卡铂	2	1	0	#NULL!	0	#NULL!	0	#NULL!	#NULL!		16	0	0	1	1	0	4	2	2	2	4	2	1	0	1	16	0	2	1	1	1	#NULL!
36	5	1	2	#NULL!	#NULL!	30	2	5	2	TP	#NULL!	2	2	1	0	#NULL!	1	#NULL!	#NULL!	2	27	0	#NULL!	2	1	1	3	2	1	2	3	2	1	0	1	27	1	3	0	1	2	1
37	5	2	2	24.1841	#NULL!	35	2	3	1		#NULL!	1	0	#NULL!	0	#NULL!	3	#NULL!	#NULL!	1	13	0	0	1	1	0	4	2	2	2	4	2	0	0	1	13	1	2	1	1	2	0
38	6	2	1	#NULL!	#NULL!	12	1	3	1	替吉奥+顺铂	2	1	2	1	0	#NULL!	2	#NULL!	#NULL!	1	27	0	0	2	2	1	2	1	0	1	1	1	1	0	1	27	0	2	0	1	1	0
39	1	2	1	#NULL!	#NULL!	5	1	3	1	替吉奥+顺铂	2	1	2	1	0	#NULL!	2	#NULL!	#NULL!	1	28	0	#NULL!	2	2	0	2	1	0	1	1	1	1	0	1	35	1	2	0	1	1	0
40	5	2	1	#NULL!	#NULL!	28	2	3	1	替吉奥	1	1	2	1	0	#NULL!	0	#NULL!	#NULL!	1	27	1	#NULL!	1	1	1	3	2	2	2	3	2	1	0	1	29	0	3	1	1	2	0
41	1	2	1	#NULL!	#NULL!	32.94	2	3	1	顺铂+紫杉醇	2	2	2	1	0	#NULL!	1	#NULL!	#NULL!	2	99	0	#NULL!	1	1	0	3	2	0	1	2	1	1	0	1	99	1	2	1	1	1	0
42	3	2	1	#NULL!	#NULL!	25	2	6	2	TP	2	2	0	#NULL!	0	#NULL!	1	#NULL!	#NULL!	1	30	0	#NULL!	1	1	0	3	2	2	2	3	2	1	0	1	30	1	2	0	1	1	1
43	3	2	1	57.5152	#NULL!	5.43	1	3	1		1	1	2	1	0	#NULL!	4	#NULL!	#NULL!	1	35	0	0	1	1	0	2	1	1	2	2	1	1	0	1	35	0	3	1	1	2	0
44	3	2	1	3.3092	#NULL!	15.42	1	4	1		2	1	0	#NULL!	0	#NULL!	3	3	#NULL!	1	14	0	#NULL!	1	1	0	2	1	1	2	2	1	1	0	1	14	1	2	1	1	2	0
45	3	2	1	#NULL!	#NULL!	#NULL!	#NULL!	#NULL!	#NULL!		1	#NULL!	#NULL!	#NULL!	#NULL!	#NULL!	#NULL!	#NULL!	#NULL!	1	37	0	#NULL!	1	2	1	4	2	2	2	4	2	1	0	1	37	1	2	1	1	1	#NULL!
46	3	2	2	#NULL!	#NULL!	19	1	3	1		2	#NULL!	1	1	1	#NULL!	#NULL!	2	#NULL!	2	88	0	#NULL!	1	2	1	2	1	0	1	1	1	1	0	1	88	1	2	1	1	1	0
47	6	2	1	#NULL!	#NULL!	14.8	1	3	1		1	#NULL!	0	#NULL!	0	#NULL!	2	3	1	2	11	0	#NULL!	1	1	1	3	2	0	1	2	1	1	0	1	24	1	2	1	1	1	0
48	3	2	1	#NULL!	#NULL!	#NULL!	#NULL!	#NULL!	#NULL!		#NULL!	#NULL!	0	#NULL!	0	#NULL!	#NULL!	#NULL!	#NULL!	1	3	0	0	1	2	0	4	2	2	2	4	2	1	0	1	3	1	2	1	1	1	#NULL!
49	7	2	1	#NULL!	#NULL!	11	1	3	1	力朴素+洛铂	2	#NULL!	#NULL!	#NULL!	#NULL!	#NULL!	#NULL!	#NULL!	#NULL!		38	0	#NULL!	1	2	0	3	2	0	1	3	2	1	0	1	38	0	3	1	1	2	0
50	5	2	2	#NULL!	#NULL!	28	2	11	2		2	1	0	#NULL!	#NULL!	#NULL!	#NULL!	2	#NULL!		57	0	#NULL!	1	1	1	3	2	2	2	3	2	1	0	1	57	1	2	1	1	1	1
51	8	1	2	#NULL!	#NULL!	15	1	2	1		2	#NULL!	0	#NULL!	0	#NULL!	#NULL!	#NULL!	#NULL!	2	108	0	#NULL!	1	1	1	3	2	1	2	3	2	1	0	1	108	1	2	1	1	1	0
52	5	2	2	#NULL!	#NULL!	24	2	7	2		2	#NULL!	2	1	0	#NULL!	1	4	#NULL!		16	0	#NULL!	1	1	1	4	2	2	2	3	2	1	0	1	16	1	2	1	1	1	1
53	7	1	2	#NULL!	#NULL!	22	1	3	1		2	#NULL!	0	#NULL!	0	#NULL!	2	#NULL!	#NULL!	1	4	0	0	1	2	0	2	1	0	1	1	1	1	0	1	4	1	2	1	1	1	0
54	1	2	2	#NULL!	#NULL!	#NULL!	#NULL!	#NULL!	#NULL!		1	#NULL!	0	#NULL!	0	#NULL!	1	3	#NULL!	2	14	0	#NULL!	1	1	1	3	2	2	2	4	2	1	0	1	14	0	2	1	1	1	#NULL!
55	5	2	2	#NULL!	#NULL!	#NULL!	#NULL!	#NULL!	#NULL!	紫杉醇+奈达铂	2	2	1	1	0	#NULL!	0	1	#NULL!		22	0	#NULL!	1	1	0	3	2	2	2	4	2	1	0	1	22	1	2	1	1	1	#NULL!
56	1	2	2	#NULL!	#NULL!	12	1	2	1	替吉奥	1	#NULL!	1	1	0	#NULL!	1	#NULL!	#NULL!		17	0	0	2	2	1	3	2	2	2	3	2	1	0	1	17	0	3	0	0	1	0
57	1	2	2	#NULL!	#NULL!	#NULL!	#NULL!	#NULL!	#NULL!	奈达铂30mg	2	1	#NULL!	#NULL!	#NULL!	#NULL!	1	3	#NULL!	1	49	0	#NULL!	1	1	0	4	2	0	1	4	2	1	0	1	49	1	3	1	1	1	#NULL!
58	1	2	2	#NULL!	#NULL!	33	2	3	1		2	#NULL!	2	1	0	#NULL!	0	#NULL!	#NULL!		5	0	0	1	1	1	3	2	2	2	3	2	1	0	1	5	0	2	0	1	1	0
59	2	2	2	#NULL!	#NULL!	#NULL!	#NULL!	#NULL!	#NULL!	TXT+奈达铂	1	1	2	1	0	#NULL!	1	#NULL!	#NULL!	1	4	0	0	1	1	0	4	2	1	2	4	2	1	0	1	24	1	2	1	1	1	#NULL!
60	6	2	2	#NULL!	#NULL!	17	1	5	2	多西洛铂	2	1	0	#NULL!	0	#NULL!	#NULL!	#NULL!	#NULL!	1	103	0	#NULL!	1	1	0	2	1	0	1	3	2	1	0	1	103	0	2	1	1	1	1
61	6	2	2	21.48	1.13591	40	2	4	1		1	#NULL!	2	1	2	#NULL!	0	#NULL!	#NULL!	2	26	0	0	1	2	0	4	2	1	2	4	2	1	0	1	26	0	2	1	1	2	0
62	4	2	2	#NULL!	#NULL!	15	1	4	1	多西他赛	2	#NULL!	1	1	0	#NULL!	#NULL!	2	#NULL!		2	0	#NULL!	1	1	1	2	1	1	2	3	2	1	0	1	2	0	2	1	1	1	0
63	3	2	2	57.0067	#NULL!	36	2	5.8	2		2	1	1	1	0	#NULL!	2	#NULL!	1	2	13	0	0	1	1	0	4	2	1	2	4	2	1	0	1	13	1	2	1	1	1	1
64	3	2	2	#NULL!	#NULL!	6	1	3	1	PF	1	1	2	1	0	#NULL!	2	#NULL!	#NULL!	1	30	0	0	2	1	1	3	2	0	1	1	1	1	0	1	30	0	3	1	1	2	0
65	6	1	2	#NULL!	#NULL!	9.04	1	3	1	药研未揭盲	2	#NULL!	4	2	#NULL!	#NULL!	#NULL!	#NULL!	#NULL!		53	0	#NULL!	2	2	0	2	1	0	1	2	1	1	0	1	53	1	2	1	1	1	0
66	1	2	2	#NULL!	#NULL!	17.26	1	3	1	紫杉醇	1	#NULL!	#NULL!	#NULL!	#NULL!	#NULL!	#NULL!	#NULL!	#NULL!		45	0	#NULL!	1	1	1	3	2	0	1	2	1	1	0	1	45	0	3	1	1	2	0
67	3	2	2	#NULL!	#NULL!	17	1	5	2		2	#NULL!	3	2	2	#NULL!	#NULL!	1	#NULL!		21	0	#NULL!	2	2	0	3	2	2	2	3	2	1	0	1	21	1	2	0	0	1	1
68	6	1	2	18.3403	#NULL!	44	2	4	1		2	1	1	1	0	#NULL!	2	2	#NULL!	1	7	0	#NULL!	1	1	0	4	2	2	2	4	2	1	0	1	7	1	2	1	1	1	0
69	3	1	2	65.5872	4.32	89	2	6	2		1	1	0	#NULL!	0	#NULL!	2	3	1	1	119	0	#NULL!	2	1	0	4	2	1	2	4	2	1	0	1	119	0	2	1	1	1	1
70	6	1	2	21.85	2.67	67.09	2	4.1	1		2	1	0	#NULL!	0	#NULL!	2	#NULL!	#NULL!	1	101	0	0	1	1	0	3	2	0	1	2	1	1	0	1	101	0	2	1	1	2	0
71	3	1	2	23.4101	0	58.84	2	6	2		2	1	1	1	0	#NULL!	1	#NULL!	#NULL!	1	29	0	#NULL!	2	2	0	2	1	1	2	2	1	1	0	1	29	1	2	1	1	1	1
72	8	1	2	#NULL!	#NULL!	22	1	4.8	2	TP	2	1	0	#NULL!	0	#NULL!	1	#NULL!	#NULL!	1	22	1	#NULL!	1	2	0	3	2	2	2	3	2	1	0	1	31	1	2	0	1	1	1
73	5	1	2	14.5208	6.75	21	1	5.6	2		2	1	0	#NULL!	0	#NULL!	3	#NULL!	#NULL!	1	7	1	#NULL!	2	1	0	4	2	1	2	3	2	1	0	1	19	1	2	1	1	1	1
74	5	1	2	#NULL!	#NULL!	18.67	1	3	1	多西他赛+奈达铂	#NULL!	#NULL!	1	1	0	#NULL!	#NULL!	#NULL!	#NULL!	2	30	1	#NULL!	1	1	1	3	2	0	1	2	1	1	0	1	97	1	2	1	1	1	0
75	4	1	2	#NULL!	#NULL!	26	2	4	1	雷替曲塞/奈达铂	#NULL!	#NULL!	#NULL!	#NULL!	#NULL!	#NULL!	#NULL!	#NULL!	#NULL!		73	0	0	1	1	0	3	2	1	2	3	2	1	0	1	73	1	2	1	1	1	0
76	8	1	2	37.5595	28.03	41	2	3	1		2	#NULL!	0	#NULL!	1	#NULL!	1	#NULL!	#NULL!	2	11	0	0	1	2	0	4	2	2	2	4	2	1	0	1	11	1	2	1	1	1	0
77	3	1	2	#NULL!	#NULL!	#NULL!	#NULL!	#NULL!	#NULL!	奈达铂	#NULL!	#NULL!	#NULL!	#NULL!	#NULL!	#NULL!	#NULL!	#NULL!	#NULL!		20	1	#NULL!	1	2	1	4	2	2	2	4	2	1	0	1	34	1	3	1	1	2	#NULL!
78	5	1	2	32.8191	#NULL!	58	2	5	2		1	1	1	1	0	#NULL!	2	#NULL!	#NULL!	1	4	1	#NULL!	1	1	0	4	2	1	2	4	2	1	0	1	11	1	3	1	1	2	1
79	5	1	2	#NULL!	#NULL!	24	2	5	2		2	#NULL!	2	1	2	#NULL!	1	#NULL!	#NULL!		64	0	#NULL!	2	1	1	4	2	2	2	3	2	1	0	1	64	0	2	0	0	1	1
80	8	1	2	#NULL!	#NULL!	#NULL!	#NULL!	#NULL!	#NULL!	PF	2	1	0	#NULL!	0	#NULL!	1	#NULL!	#NULL!	1	32	0	#NULL!	2	2	0	3	2	1	2	3	2	1	0	1	32	0	2	0	1	1	#NULL!
81	6	1	2	#NULL!	#NULL!	#NULL!	#NULL!	#NULL!	#NULL!		#NULL!	#NULL!	2	1	0	#NULL!	1	1	#NULL!		5	0	#NULL!	2	1	0	3	2	2	2	3	2	0	0	1	5	1	2	0	0	1	#NULL!
82	3	1	2	#NULL!	#NULL!	#NULL!	#NULL!	#NULL!	#NULL!	雷替曲塞+奈达铂	2	#NULL!	#NULL!	#NULL!	#NULL!	#NULL!	#NULL!	#NULL!	#NULL!		78	0	0	1	1	0	4	2	3	2	4	2	1	0	1	78	1	3	1	1	2	#NULL!
83	1	2	2	#NULL!	#NULL!	13.82	1	2	1	雷替曲塞+奈达铂	2	#NULL!	#NULL!	#NULL!	#NULL!	#NULL!	#NULL!	#NULL!	#NULL!		116	0	0	1	1	1	4	2	3	2	2	1	1	0	1	116	0	3	1	1	2	0
84	4	1	2	#NULL!	#NULL!	7	1	3	1	顺铂	1	1	0	#NULL!	0	#NULL!	0	#NULL!	#NULL!	2	33	0	#NULL!	2	1	1	1	1	0	1	1	1	1	0	1	33	0	2	0	1	1	0
85	3	1	2	27.8265	#NULL!	29.07	2	5	2		2	1	1	1	1	#NULL!	2	#NULL!	#NULL!	1	43	0	0	1	1	0	2	1	1	2	2	1	1	0	1	43	0	2	1	1	2	1
86	8	1	2	#NULL!	#NULL!	#NULL!	#NULL!	#NULL!	#NULL!	紫杉醇+洛铂	2	1	2	1	0	#NULL!	2	#NULL!	#NULL!	1	12	0	0	1	1	1	3	2	2	2	3	2	1	0	1	12	0	2	1	1	1	#NULL!
87	7	1	2	#NULL!	#NULL!	#NULL!	#NULL!	#NULL!	#NULL!	PF	2	1	1	1	0	#NULL!	2	#NULL!	#NULL!	1	24	1	#NULL!	2	2	0	4	2	0	1	3	2	1	0	1	33	0	2	0	1	1	#NULL!
88	8	1	2	#NULL!	#NULL!	#NULL!	#NULL!	#NULL!	#NULL!	T	1	2	0	#NULL!	0	#NULL!	0	#NULL!	#NULL!	1	34	0	0	2	2	0	4	2	2	2	3	2	1	0	1	34	0	2	0	1	1	#NULL!
89	5	1	2	#NULL!	#NULL!	#NULL!	#NULL!	#NULL!	#NULL!	奈达铂	#NULL!	#NULL!	#NULL!	#NULL!	#NULL!	#NULL!	#NULL!	#NULL!	#NULL!		10	0	0	1	1	0	4	2	2	2	4	2	1	0	1	15	0	3	1	1	2	#NULL!
90	3	1	2	#NULL!	#NULL!	#NULL!	#NULL!	#NULL!	#NULL!	艾素+洛铂	#NULL!	#NULL!	#NULL!	#NULL!	#NULL!	#NULL!	#NULL!	#NULL!	#NULL!		38	0	#NULL!	1	1	1	4	2	2	2	4	2	1	0	1	38	1	3	1	1	2	#NULL!
91	3	1	2	#NULL!	#NULL!	9.93	1	3	1	白紫+顺铂	2	2	2	1	0	#NULL!	2	1	#NULL!		3	1	#NULL!	1	2	0	3	2	2	2	2	1	1	0	1	7	1	2	1	1	1	0
92	6	1	2	#NULL!	#NULL!	#NULL!	#NULL!	#NULL!	#NULL!	紫杉醇+洛铂	1	2	1	1	0	#NULL!	3	#NULL!	#NULL!		19	0	0	2	2	1	3	2	2	2	4	2	1	0	1	19	0	2	0	0	1	#NULL!
93	1	1	2	#NULL!	#NULL!	#NULL!	#NULL!	#NULL!	#NULL!		2	#NULL!	0	#NULL!	0	#NULL!	0	1	#NULL!	1	10	1	#NULL!	2	1	1	4	2	2	2	3	2	0	0	1	15	1	2	0	0	1	#NULL!
94	5	1	1	#NULL!	#NULL!	#NULL!	#NULL!	#NULL!	#NULL!	替吉奥	1	#NULL!	2	1	0	#NULL!	0	#NULL!	#NULL!	1	14	0	0	1	2	0	3	2	2	2	3	2	1	0	1	14	0	2	1	1	1	#NULL!
95	4	1	1	#NULL!	#NULL!	#NULL!	#NULL!	#NULL!	#NULL!	紫杉醇+卡倍他滨	2	1	1	1	0	#NULL!	0	#NULL!	#NULL!		19	0	#NULL!	1	1	1	4	2	2	2	3	2	1	0	1	19	0	2	1	1	1	#NULL!
96	8	2	2	23.4289	#NULL!	38	2	4	1		#NULL!	1	1	1	0	#NULL!	2	#NULL!	1	1	62	0	#NULL!	1	1	0	4	2	0	1	4	2	1	0	1	62	0	3	1	1	2	0
97	1	1	2	20.8458	0	27	2	3	1		2	1	1	1	0	#NULL!	1	#NULL!	#NULL!	2	4	1	#NULL!	1	1	0	4	2	0	1	4	2	0	0	1	18	1	2	1	1	1	0
98	8	2	2	#NULL!	#NULL!	#NULL!	#NULL!	#NULL!	#NULL!	PF	#NULL!	1	0	#NULL!	0	#NULL!	#NULL!	1	#NULL!	1	77	1	#NULL!	1	1	1	4	2	1	2	4	2	1	0	1	101	1	3	1	1	2	#NULL!
99	1	1	2	#NULL!	#NULL!	15.67	1	3	1		2	#NULL!	0	#NULL!	0	#NULL!	#NULL!	1	#NULL!		14	0	#NULL!	1	2	0	2	1	0	1	2	1	0	0	1	14	1	2	1	1	1	0
100	5	1	1	22.8068	#NULL!	29	2	4	1		#NULL!	1	2	1	0	#NULL!	1	#NULL!	#NULL!	2	22	0	0	2	2	0	4	2	1	2	4	2	1	0	1	22	1	3	1	1	2	0
101	6	1	1	11.1866	#NULL!	23	1	2	1		1	1	2	1	1	#NULL!	2	#NULL!	#NULL!	1	11	0	0	2	2	0	3	2	2	2	3	2	1	0	1	11	1	2	1	1	1	0
102	1	1	1	#NULL!	#NULL!	#NULL!	#NULL!	#NULL!	#NULL!		1	#NULL!	0	#NULL!	0	#NULL!	1	#NULL!	#NULL!		3	0	0	1	1	0	4	2	1	2	3	2	0	0	1	3	0	3	0	0	1	#NULL!
103	7	1	1	#NULL!	#NULL!	#NULL!	#NULL!	#NULL!	#NULL!	多西他赛+卡铂	#NULL!	#NULL!	2	1	0	#NULL!	#NULL!	#NULL!	#NULL!	1	11	0	0	1	1	1	2	1	3	2	4	2	1	0	1	11	1	2	1	1	1	#NULL!
104	6	1	1	#NULL!	#NULL!	#NULL!	#NULL!	#NULL!	#NULL!	紫杉醇+奈达铂	2	1	2	1	0	#NULL!	0	#NULL!	#NULL!	1	5	1	#NULL!	1	1	1	2	1	2	2	3	2	1	0	1	8	0	2	1	1	1	#NULL!
105	8	1	1	#NULL!	#NULL!	#NULL!	#NULL!	#NULL!	#NULL!	紫杉醇+奈达铂	2	2	2	1	0	#NULL!	1	1	#NULL!		1	1	#NULL!	2	1	1	3	2	2	2	3	2	1	0	1	3	1	2	0	0	1	#NULL!
106	1	1	1	#NULL!	#NULL!	9.75	1	3	1		2	#NULL!	1	1	0	#NULL!	2	1	#NULL!		16	1	#NULL!	2	2	0	3	2	2	2	2	1	1	0	1	24	0	2	0	0	1	0
107	5	2	2	#NULL!	#NULL!	#NULL!	#NULL!	#NULL!	#NULL!	多西顺铂	2	1	0	#NULL!	0	#NULL!	#NULL!	4	#NULL!	1	75	0	#NULL!	1	1	0	2	1	3	2	3	2	1	0	1	75	0	3	1	1	1	#NULL!
108	3	1	1	48.7972	#NULL!	15	1	6	2		2	2	2	1	1	#NULL!	2	#NULL!	#NULL!	1	31	0	0	1	1	0	2	1	2	2	3	2	1	0	1	31	0	2	1	1	1	1
109	6	1	1	74.8137	#NULL!	21.29	1	3	1		2	1	0	#NULL!	0	#NULL!	3	#NULL!	#NULL!	1	27	0	0	1	1	0	3	2	0	1	2	1	1	0	1	57	0	2	1	1	1	0
110	7	2	1	23.4525	0	27	2	5	2		2	1	1	1	0	#NULL!	1	#NULL!	#NULL!	2	28	1	#NULL!	2	1	0	1	1	2	2	3	2	1	0	1	48	0	2	1	1	1	1
111	6	1	1	40.6421	#NULL!	18.75	1	6	2		#NULL!	1	3	2	1	#NULL!	1	1	#NULL!	1	8	1	#NULL!	2	1	0	3	2	0	1	2	1	0	0	1	19	1	2	1	1	1	1
112	4	1	1	#NULL!	#NULL!	#NULL!	#NULL!	#NULL!	#NULL!	洛铂	1	1	2	1	0	#NULL!	0	#NULL!	#NULL!		8	0	0	1	1	1	3	2	2	2	3	2	1	0	1	8	0	3	1	1	1	#NULL!
113	5	1	1	19.0399	#NULL!	20.78	1	4	1		#NULL!	1	1	1	0	#NULL!	2	2	#NULL!	1	2	1	#NULL!	2	2	0	3	2	0	1	2	1	0	0	1	7	1	3	1	1	1	0
114	1	1	1	9.0125	0	24	2	3	1		2	1	1	1	1	#NULL!	2	#NULL!	#NULL!	1	11	0	0	1	2	0	4	2	1	2	4	2	1	0	1	11	1	2	1	1	1	0
115	8	1	1	#NULL!	#NULL!	#NULL!	#NULL!	#NULL!	#NULL!	多西他赛+顺铂	2	1	0	#NULL!	3	#NULL!	#NULL!	#NULL!	#NULL!	1	13	0	0	1	1	1	3	2	2	2	3	2	1	0	1	13	1	2	1	1	1	#NULL!
116	5	1	1	#NULL!	#NULL!	#NULL!	#NULL!	#NULL!	#NULL!	紫杉醇+顺铂	2	#NULL!	#NULL!	#NULL!	#NULL!	#NULL!	#NULL!	#NULL!	#NULL!		24	0	0	1	1	1	4	2	2	2	4	2	1	0	1	24	1	3	1	1	1	#NULL!
117	1	1	1	33.3666	#NULL!	28	2	3.5	1		1	1	1	1	0	#NULL!	3	#NULL!	#NULL!	1	28	1	#NULL!	2	1	0	2	1	1	2	3	2	1	0	1	55	0	2	1	1	1	0
118	5	1	1	#NULL!	#NULL!	25	2	3	1	PF	2	2	1	1	0	#NULL!	0	#NULL!	#NULL!		18	1	#NULL!	1	1	0	4	2	2	2	3	2	1	0	1	27	0	2	1	1	1	0
119	1	1	1	#NULL!	#NULL!	22	1	3	1	TP	2	1	3	2	0	#NULL!	1	1	#NULL!	1	21	1	#NULL!	1	1	0	3	2	0	1	2	1	1	0	1	75	1	2	1	1	1	0
120	7	1	1	#NULL!	#NULL!	11	1	3	1	紫杉醇+洛铂	#NULL!	1	0	#NULL!	0	#NULL!	0	1	1		19	1	#NULL!	1	1	1	4	2	2	2	3	2	1	0	1	28	1	2	1	1	1	0
121	1	1	1	#NULL!	#NULL!	28	2	6	2	力朴素顺铂	2	#NULL!	#NULL!	#NULL!	#NULL!	#NULL!	#NULL!	#NULL!	#NULL!		11	0	#NULL!	2	1	1	3	2	1	2	3	2	1	0	1	11	1	2	1	1	1	1
122	8	2	1	#NULL!	#NULL!	25	2	8	2	卡培他滨+奈达铂	2	1	1	1	0	#NULL!	0	#NULL!	#NULL!	2	28	0	#NULL!	1	2	1	3	2	1	2	3	2	1	0	1	28	0	3	1	1	1	1
123	4	2	1	#NULL!	#NULL!	24	2	11	2	氟尿嘧啶	2	1	0	#NULL!	4	#NULL!	0	#NULL!	#NULL!	1	38	0	0	2	2	0	3	2	2	2	3	2	1	0	1	38	0	2	0	1	1	1
124	6	2	1	#NULL!	#NULL!	12	1	2	1		#NULL!	#NULL!	1	1	1	#NULL!	#NULL!	3	3	2	2	1	#NULL!	1	1	0	3	2	2	2	3	2	0	0	1	5	1	2	1	1	1	0
125	5	2	2	#NULL!	#NULL!	33	2	7	2	TP	#NULL!	#NULL!	1	1	1	#NULL!	1	#NULL!	#NULL!	2	100	0	#NULL!	1	1	1	3	2	3	2	3	2	1	0	1	100	0	2	1	1	1	1
126	8	2	2	#NULL!	#NULL!	17	1	2	1	放疗前TC化疗一周期	#NULL!	#NULL!	1	1	0	#NULL!	1	#NULL!	#NULL!	2	101	0	#NULL!	1	1	0	3	2	2	2	3	2	1	0	1	101	0	3	1	1	1	0
127	3	2	1	#NULL!	#NULL!	#NULL!	#NULL!	#NULL!	#NULL!		#NULL!	#NULL!	1	1	0	#NULL!	1	#NULL!	#NULL!		6	0	#NULL!	2	2	1	4	2	2	2	4	2	0	0	1	6	0	3	0	0	1	#NULL!
128	5	2	1	#NULL!	#NULL!	15	1	3	1		2	#NULL!	#NULL!	#NULL!	#NULL!	#NULL!	#NULL!	#NULL!	#NULL!	2	11	0	0	1	1	1	2	1	0	1	3	2	1	0	1	11	1	2	1	1	1	0
129	1	2	1	#NULL!	#NULL!	17	1	5	2		1	#NULL!	1	1	0	#NULL!	2	#NULL!	#NULL!		18	1	#NULL!	1	1	1	3	2	2	2	3	2	1	0	1	37	0	2	1	1	1	1
130	8	2	1	21.0628	7.19	28	2	3	1		#NULL!	1	1	1	0	#NULL!	3	#NULL!	#NULL!	1	131	0	0	1	1	0	2	1	0	1	2	1	1	0	1	131	0	2	1	1	1	0
131	8	2	1	17.2	0	40	2	4	1		#NULL!	1	0	#NULL!	0	#NULL!	2	#NULL!	#NULL!	2	16	0	0	1	1	0	4	2	1	2	4	2	1	0	1	16	1	2	1	1	1	0
132	1	2	1	20.2422	#NULL!	45	2	4	1		2	1	1	1	1	#NULL!	0	#NULL!	#NULL!	1	23	1	#NULL!	2	1	0	4	2	0	1	4	2	1	0	1	60	0	2	1	1	1	0
133	8	2	2	#NULL!	#NULL!	#NULL!	#NULL!	#NULL!	#NULL!	多西他赛120mg d1+顺铂40mg d1-3	#NULL!	1	2	1	0	#NULL!	3	#NULL!	#NULL!	2	27	1	#NULL!	1	1	0	2	1	1	2	4	2	1	0	1	40	0	2	1	1	1	#NULL!
134	8	1	1	#NULL!	#NULL!	33	2	6	2		2	1	0	#NULL!	0	#NULL!	1	#NULL!	#NULL!	2	1	0	0	1	1	1	4	2	2	2	4	2	0	0	1	1	0	2	1	1	1	1
135	7	2	2	#NULL!	#NULL!	#NULL!	#NULL!	#NULL!	#NULL!		#NULL!	#NULL!	2	1	0	#NULL!	#NULL!	3	4	1	20	1	#NULL!	1	1	0	2	1	1	2	4	2	1	0	1	27	1	2	1	1	1	#NULL!
136	1	2	2	74.8021	0	24	2	6	2		2	1	0	#NULL!	0	#NULL!	0	2	#NULL!	1	2	1	#NULL!	1	1	0	2	1	1	2	2	1	1	0	1	83	0	2	1	1	1	1
137	6	2	2	#NULL!	#NULL!	#NULL!	#NULL!	#NULL!	#NULL!	雷替曲赛+顺铂	1	#NULL!	#NULL!	#NULL!	#NULL!	#NULL!	#NULL!	#NULL!	#NULL!		11	1	#NULL!	1	2	0	4	2	0	1	4	2	1	0	1	25	1	3	1	1	1	#NULL!
138	8	1	2	#NULL!	#NULL!	33	2	3	1	紫杉醇+奈达铂	1	1	#NULL!	#NULL!	#NULL!	#NULL!	#NULL!	1	1	2	7	1	#NULL!	1	1	0	3	2	0	1	2	1	1	0	1	15	1	2	0	0	1	0
139	8	2	2	#NULL!	#NULL!	22	1	4	1	紫杉醇+洛铂	2	1	0	#NULL!	0	#NULL!	0	1	#NULL!		9	1	#NULL!	1	1	0	2	1	1	2	3	2	1	0	1	35	1	2	1	1	1	0
140	1	2	2	#NULL!	#NULL!	#NULL!	#NULL!	#NULL!	#NULL!		2	#NULL!	0	#NULL!	0	#NULL!	0	1	#NULL!		4	1	#NULL!	1	1	0	4	2	3	2	4	2	1	0	1	12	1	3	0	0	1	#NULL!
141	4	2	2	#NULL!	#NULL!	30	2	4	1	白紫+顺铂	#NULL!	#NULL!	2	1	0	#NULL!	#NULL!	2	#NULL!	2	10	1	#NULL!	1	1	0	2	1	3	2	4	2	1	0	1	11	1	2	1	1	1	0
142	7	2	2	#NULL!	#NULL!	21	1	5	2	紫杉醇+洛铂	#NULL!	2	2	1	0	#NULL!	2	1	#NULL!		5	0	#NULL!	1	1	0	3	2	2	2	3	2	1	0	1	5	0	2	1	0	1	1
143	3	2	2	#NULL!	#NULL!	#NULL!	#NULL!	#NULL!	#NULL!		2	#NULL!	2	1	2	#NULL!	2	1	#NULL!	1	3	1	#NULL!	1	2	1	2	1	1	2	2	1	1	0	1	17	1	2	1	1	1	#NULL!
144	6	2	2	#NULL!	#NULL!	26	2	4.8	2		1	#NULL!	0	#NULL!	0	#NULL!	0	#NULL!	3		19	1	#NULL!	1	1	0	4	2	2	2	3	2	0	0	1	20	1	2	1	1	1	1
145	6	2	2	11.4943	4.8	10	1	4	1		2	1	0	#NULL!	0	#NULL!	4	1	#NULL!	1	32	0	#NULL!	1	1	0	3	2	0	1	2	1	1	0	1	32	1	3	1	1	1	0
146	6	2	2	#NULL!	#NULL!	24	2	5.6	2	奈达铂+替吉奥	2	1	2	1	0	#NULL!	1	#NULL!	#NULL!		38	1	#NULL!	1	1	1	4	2	0	1	3	2	1	0	1	58	0	2	0	0	1	1
147	3	2	2	#NULL!	#NULL!	#NULL!	#NULL!	#NULL!	#NULL!	紫杉醇+卡铂化疗1周期后，出现IV度骨髓抑制伴发热，予暂停放疗，后调整第2周�	2	#NULL!	2	1	0	#NULL!	4	2	#NULL!	1	5	1	#NULL!	1	1	1	3	2	3	2	4	2	1	0	1	22	1	3	1	1	1	#NULL!
148	6	2	2	#NULL!	#NULL!	#NULL!	#NULL!	#NULL!	#NULL!	PF	2	1	0	#NULL!	0	#NULL!	3	#NULL!	#NULL!	2	31	0	#NULL!	1	1	0	3	2	1	2	3	2	1	0	1	31	1	3	1	1	1	#NULL!
149	1	2	2	#NULL!	#NULL!	#NULL!	#NULL!	#NULL!	#NULL!	TP	2	1	1	1	0	#NULL!	1	#NULL!	#NULL!	1	31	0	#NULL!	1	1	0	3	2	2	2	3	2	1	0	1	41	0	3	0	1	1	#NULL!
150	3	2	2	#NULL!	#NULL!	#NULL!	#NULL!	#NULL!	#NULL!	雷替曲赛+顺铂	2	#NULL!	#NULL!	#NULL!	#NULL!	#NULL!	#NULL!	#NULL!	#NULL!		65	0	#NULL!	1	1	0	4	2	1	2	4	2	1	0	1	65	1	2	1	1	1	#NULL!
151	3	2	2	17.9357	0	18	1	3	1		2	1	1	1	0	#NULL!	2	#NULL!	#NULL!	1	103	0	0	2	1	0	2	1	0	1	2	1	1	0	1	103	0	2	1	1	1	0
152	8	2	2	11.1932	0	24	2	4	1		2	1	0	#NULL!	0	#NULL!	3	3	1	1	24	1	#NULL!	1	1	0	3	2	1	2	3	2	1	0	1	52	1	2	1	1	1	0
153	3	2	2	48.631	0.678447	50	2	4	1		2	1	0	#NULL!	1	#NULL!	1	#NULL!	#NULL!	1	113	0	0	1	2	0	4	2	0	1	4	2	1	0	1	113	0	3	1	1	1	0
154	8	2	2	#NULL!	#NULL!	#NULL!	#NULL!	#NULL!	#NULL!	PF	2	1	0	#NULL!	0	#NULL!	0	#NULL!	#NULL!		25	1	#NULL!	2	1	1	4	2	1	2	3	2	1	0	1	34	0	2	0	0	1	#NULL!
155	3	2	1	#NULL!	#NULL!	#NULL!	#NULL!	#NULL!	#NULL!	紫杉醇+奈达铂	2	2	0	#NULL!	0	#NULL!	0	#NULL!	#NULL!		39	0	#NULL!	1	1	0	2	1	1	2	2	1	1	0	1	39	0	3	1	1	1	#NULL!
156	1	2	1	#NULL!	#NULL!	#NULL!	#NULL!	#NULL!	#NULL!	替吉奥	1	1	2	1	0	#NULL!	0	#NULL!	#NULL!	1	33	1	#NULL!	1	1	1	3	2	2	2	3	2	1	0	1	34	0	2	1	1	1	#NULL!
157	8	2	1	#NULL!	#NULL!	#NULL!	#NULL!	#NULL!	#NULL!	多西顺铂	2	1	3	2	0	#NULL!	1	#NULL!	#NULL!	1	13	0	0	1	2	0	4	2	2	2	4	2	1	0	1	13	1	2	1	0	1	#NULL!
158	4	2	1	#NULL!	#NULL!	#NULL!	#NULL!	#NULL!	#NULL!	替吉奥	1	#NULL!	0	#NULL!	0	#NULL!	0	#NULL!	#NULL!	1	17	0	0	1	1	1	4	2	2	2	4	2	1	0	1	17	0	2	1	1	1	#NULL!
159	5	2	2	#NULL!	#NULL!	#NULL!	#NULL!	#NULL!	#NULL!	PF	2	1	2	1	1	#NULL!	1	#NULL!	2	2	75	0	#NULL!	1	1	1	3	2	2	2	3	2	1	0	1	75	1	2	1	0	1	#NULL!
160	8	2	2	#NULL!	#NULL!	#NULL!	#NULL!	#NULL!	#NULL!	奈达铂+替吉奥	#NULL!	#NULL!	1	1	0	#NULL!	3	#NULL!	#NULL!	1	29	0	0	1	1	1	4	2	2	2	3	2	1	0	1	29	1	2	1	1	1	#NULL!
161	3	2	2	#NULL!	#NULL!	#NULL!	#NULL!	#NULL!	#NULL!	奈达铂	1	#NULL!	#NULL!	#NULL!	#NULL!	#NULL!	#NULL!	3	1		8	1	#NULL!	1	1	1	4	2	1	2	4	2	1	0	1	14	0	2	1	1	1	#NULL!
162	8	2	2	#NULL!	#NULL!	#NULL!	#NULL!	#NULL!	#NULL!	替吉奥	1	#NULL!	#NULL!	#NULL!	#NULL!	#NULL!	#NULL!	#NULL!	#NULL!		79	0	0	1	2	1	2	1	1	2	2	1	1	0	1	79	0	2	1	0	1	#NULL!
163	6	2	2	#NULL!	#NULL!	#NULL!	#NULL!	#NULL!	#NULL!	紫杉醇+顺铂	2	1	0	#NULL!	0	#NULL!	#NULL!	#NULL!	#NULL!	1	21	0	0	1	2	1	4	2	1	2	3	2	1	0	1	21	1	3	1	0	1	#NULL!
164	7	1	2	#NULL!	#NULL!	#NULL!	#NULL!	#NULL!	#NULL!	紫杉醇+奈达铂	2	1	1	1	0	#NULL!	0	2	#NULL!	1	4	1	#NULL!	1	2	0	3	2	2	2	3	2	1	0	1	9	1	2	1	0	1	#NULL!
165	5	2	2	#NULL!	#NULL!	#NULL!	#NULL!	#NULL!	#NULL!	紫杉醇+奈达铂	2	1	3	2	0	#NULL!	1	#NULL!	#NULL!		8	0	0	2	1	0	2	1	2	2	4	2	1	0	1	8	0	2	0	0	1	#NULL!
166	1	2	1	#NULL!	#NULL!	#NULL!	#NULL!	#NULL!	#NULL!	替吉奥	1	#NULL!	#NULL!	#NULL!	#NULL!	#NULL!	3	#NULL!	#NULL!	1	16	0	0	1	1	1	1	1	1	2	3	2	1	0	1	16	0	3	1	0	1	#NULL!
167	6	2	2	#NULL!	#NULL!	40	2	6	2	白紫+奈达铂	2	1	2	1	0	#NULL!	3	#NULL!	#NULL!	1	6	0	0	1	1	0	3	2	2	2	4	2	1	0	1	6	0	3	1	1	1	1
168	3	2	2	#NULL!	#NULL!	#NULL!	#NULL!	#NULL!	#NULL!	紫杉醇+洛铂	2	1	3	2	0	#NULL!	2	#NULL!	#NULL!	1	5	0	0	2	1	1	3	2	2	2	3	2	1	0	1	5	0	2	0	0	1	#NULL!
169	8	2	2	#NULL!	#NULL!	#NULL!	#NULL!	#NULL!	#NULL!	TP	2	1	0	#NULL!	0	#NULL!	0	#NULL!	#NULL!	1	53	0	#NULL!	1	1	1	2	1	1	2	3	2	1	0	1	53	1	3	1	0	1	#NULL!
170	6	2	2	#NULL!	#NULL!	9	1	3	1	雷替曲赛+顺铂	2	#NULL!	#NULL!	#NULL!	#NULL!	#NULL!	#NULL!	#NULL!	#NULL!		17	0	#NULL!	2	2	0	4	2	0	1	2	1	1	0	1	17	1	3	1	0	1	0
171	1	2	2	#NULL!	#NULL!	#NULL!	#NULL!	#NULL!	#NULL!		#NULL!	#NULL!	1	1	0	#NULL!	2	#NULL!	#NULL!	2	31	0	#NULL!	1	2	1	4	2	3	2	4	2	1	0	1	31	1	3	1	0	1	#NULL!
172	8	2	2	#NULL!	#NULL!	#NULL!	#NULL!	#NULL!	#NULL!	TP	2	1	0	#NULL!	0	#NULL!	0	#NULL!	#NULL!	1	46	0	0	1	1	0	2	1	2	2	3	2	1	0	1	46	1	3	0	0	1	#NULL!
173	5	2	2	#NULL!	#NULL!	#NULL!	#NULL!	#NULL!	#NULL!	紫杉醇+奈达铂	2	2	1	1	0	#NULL!	0	#NULL!	#NULL!	2	11	0	0	1	2	0	3	2	2	2	3	2	1	0	1	11	0	2	1	1	1	#NULL!
174	1	2	2	#NULL!	#NULL!	#NULL!	#NULL!	#NULL!	#NULL!	FP	2	1	0	#NULL!	0	#NULL!	3	#NULL!	#NULL!	1	54	1	#NULL!	1	1	0	3	2	2	2	3	2	1	0	1	63	1	2	0	0	1	#NULL!
175	4	2	2	#NULL!	#NULL!	#NULL!	#NULL!	#NULL!	#NULL!	雷替曲塞/奈达铂	2	#NULL!	#NULL!	#NULL!	#NULL!	#NULL!	#NULL!	#NULL!	#NULL!		35	0	#NULL!	2	1	1	1	1	1	2	2	1	1	0	1	35	1	2	1	0	1	#NULL!
176	8	2	2	#NULL!	#NULL!	#NULL!	#NULL!	#NULL!	#NULL!	单药卡培他滨	1	1	0	#NULL!	0	#NULL!	0	#NULL!	#NULL!	2	39	1	#NULL!	1	2	0	4	2	2	2	3	2	1	0	1	48	1	2	1	0	1	#NULL!
177	1	2	2	#NULL!	#NULL!	9	1	3	1	PF	2	1	1	1	0	#NULL!	2	#NULL!	#NULL!		20	1	#NULL!	1	1	0	1	1	0	1	1	1	1	0	1	34	1	2	1	0	1	0
178	1	2	2	#NULL!	#NULL!	#NULL!	#NULL!	#NULL!	#NULL!	紫杉醇+洛铂	2	#NULL!	#NULL!	#NULL!	#NULL!	#NULL!	#NULL!	#NULL!	#NULL!		19	1	#NULL!	1	2	1	2	1	0	1	2	1	1	0	1	28	0	2	1	0	1	#NULL!
179	3	2	2	#NULL!	#NULL!	#NULL!	#NULL!	#NULL!	#NULL!	顺铂	1	1	2	1	0	#NULL!	3	#NULL!	#NULL!	1	53	0	#NULL!	1	1	1	4	2	2	2	4	2	1	0	1	53	1	3	1	1	1	#NULL!
180	8	2	2	#NULL!	#NULL!	12	1	3	1	TP	2	2	1	1	2	#NULL!	1	#NULL!	#NULL!	1	20	1	#NULL!	1	1	1	3	2	0	1	1	1	1	0	1	34	1	3	1	0	1	0
181	6	2	2	#NULL!	#NULL!	#NULL!	#NULL!	#NULL!	#NULL!		#NULL!	#NULL!	2	1	0	#NULL!	1	#NULL!	#NULL!		60	0	0	2	2	0	3	2	2	2	3	2	1	0	1	60	0	3	0	0	1	#NULL!
182	7	2	2	#NULL!	#NULL!	#NULL!	#NULL!	#NULL!	#NULL!	洛铂	1	1	2	1	0	#NULL!	1	#NULL!	#NULL!		44	1	#NULL!	1	2	1	3	2	2	2	2	1	1	0	1	53	1	3	0	1	1	#NULL!
183	1	1	2	#NULL!	#NULL!	#NULL!	#NULL!	#NULL!	#NULL!	雷替曲赛+顺铂	2	#NULL!	#NULL!	#NULL!	#NULL!	#NULL!	#NULL!	#NULL!	#NULL!		25	0	0	1	1	1	4	2	0	1	4	2	1	0	1	25	0	3	1	0	1	#NULL!
184	8	2	2	#NULL!	#NULL!	#NULL!	#NULL!	#NULL!	#NULL!	TP	2	1	0	#NULL!	0	#NULL!	2	#NULL!	#NULL!	1	25	1	#NULL!	1	1	1	3	2	1	2	3	2	1	0	1	38	1	2	0	0	1	#NULL!
185	6	2	2	31.4	0	29	2	8	2		#NULL!	#NULL!	0	#NULL!	0	#NULL!	2	1	#NULL!	1	15	1	#NULL!	2	2	0	4	2	1	2	3	2	0	0	1	22	1	2	0	0	1	1
186	6	2	2	#NULL!	#NULL!	#NULL!	#NULL!	#NULL!	#NULL!		2	#NULL!	1	1	0	#NULL!	0	#NULL!	#NULL!	1	18	1	#NULL!	1	2	1	4	2	2	2	3	2	1	0	1	58	0	2	0	1	1	#NULL!
187	1	2	2	17.5892	1.5	44	2	5	2		2	1	1	1	1	#NULL!	3	#NULL!	#NULL!	1	11	1	#NULL!	1	2	0	3	2	1	2	3	2	1	0	1	17	1	3	0	0	1	1
188	5	2	2	#NULL!	#NULL!	24	2	3	1	替吉奥+顺铂	2	1	2	1	0	#NULL!	2	#NULL!	#NULL!	1	24	1	#NULL!	2	2	0	3	2	0	1	1	1	1	0	1	45	1	2	1	0	1	0
189	1	2	2	#NULL!	#NULL!	#NULL!	#NULL!	#NULL!	#NULL!	奈达铂+希罗达	2	1	1	1	0	#NULL!	1	#NULL!	#NULL!		51	1	#NULL!	1	1	1	3	2	2	2	4	2	1	0	1	57	0	2	1	1	1	#NULL!
190	4	2	2	#NULL!	#NULL!	#NULL!	#NULL!	#NULL!	#NULL!	紫杉醇+奈达铂	2	2	2	1	0	#NULL!	0	3	1		24	1	#NULL!	1	1	1	4	2	2	2	3	2	1	0	1	33	1	2	1	1	1	#NULL!
191	7	2	2	#NULL!	#NULL!	#NULL!	#NULL!	#NULL!	#NULL!	同步氟尿嘧啶qw	1	2	1	1	0	#NULL!	1	#NULL!	#NULL!	1	36	0	0	2	2	0	4	2	0	1	3	2	1	0	1	31	0	2	0	0	1	#NULL!
192	1	2	2	#NULL!	#NULL!	#NULL!	#NULL!	#NULL!	#NULL!	氟尿嘧啶	1	1	1	1	0	#NULL!	0	#NULL!	#NULL!	1	14	1	#NULL!	2	2	0	4	2	0	1	3	2	1	0	1	31	1	2	0	0	1	#NULL!
193	5	2	2	#NULL!	#NULL!	#NULL!	#NULL!	#NULL!	#NULL!	TP	2	1	0	#NULL!	0	#NULL!	0	#NULL!	#NULL!	1	4	1	#NULL!	1	1	0	4	2	2	2	3	2	1	0	1	9	1	2	1	0	1	#NULL!
194	1	2	2	#NULL!	#NULL!	#NULL!	#NULL!	#NULL!	#NULL!	顺铂	1	1	0	#NULL!	0	#NULL!	0	#NULL!	#NULL!	2	47	0	0	1	1	1	3	2	2	2	3	2	1	0	1	42	0	2	1	0	1	#NULL!
195	7	2	2	#NULL!	#NULL!	#NULL!	#NULL!	#NULL!	#NULL!	多西紫杉醇+顺铂(1)骨髓抑制	2	#NULL!	#NULL!	#NULL!	#NULL!	#NULL!	#NULL!	#NULL!	#NULL!		35	0	#NULL!	2	2	1	4	2	2	2	4	2	1	0	1	35	1	2	0	0	1	#NULL!
196	2	2	2	#NULL!	#NULL!	#NULL!	#NULL!	#NULL!	#NULL!	PF	2	1	0	#NULL!	0	#NULL!	0	#NULL!	#NULL!	1	13	1	#NULL!	2	1	0	3	2	1	2	3	2	1	0	1	19	1	2	0	0	1	#NULL!
197	8	2	2	62.9979	6.97199	70	2	6	2		2	1	3	2	0	#NULL!	4	1	#NULL!	1	6	1	#NULL!	1	1	0	3	2	0	1	2	1	1	0	1	9	1	2	0	0	1	1
198	1	2	2	#NULL!	#NULL!	#NULL!	#NULL!	#NULL!	#NULL!	紫杉醇白蛋白结合型+顺铂	2	#NULL!	0	#NULL!	0	#NULL!	#NULL!	#NULL!	#NULL!	1	29	0	#NULL!	1	1	0	4	2	1	2	4	2	1	0	1	29	1	3	0	0	1	#NULL!
199	8	2	2	#NULL!	#NULL!	34	2	6	2	雷替曲赛+顺铂	2	#NULL!	#NULL!	#NULL!	#NULL!	#NULL!	#NULL!	#NULL!	#NULL!		6	0	#NULL!	1	2	0	4	2	0	1	4	2	1	0	1	6	1	2	0	0	1	1
200	8	2	2	#NULL!	#NULL!	57	2	3	1	紫杉醇+卡铂	2	#NULL!	0	#NULL!	0	#NULL!	0	#NULL!	#NULL!	2	46	1	#NULL!	1	1	0	1	1	2	2	1	1	1	0	1	34	0	2	0	1	1	0
201	7	2	2	#NULL!	#NULL!	#NULL!	#NULL!	#NULL!	#NULL!		#NULL!	#NULL!	0	#NULL!	0	#NULL!	#NULL!	1	#NULL!	2	9	1	#NULL!	1	1	0	3	2	3	2	4	2	1	0	1	14	1	2	1	0	1	#NULL!
202	5	2	2	#NULL!	#NULL!	#NULL!	#NULL!	#NULL!	#NULL!	雷替曲塞+奈达铂	2	#NULL!	#NULL!	#NULL!	#NULL!	#NULL!	#NULL!	#NULL!	#NULL!		24	0	0	1	1	0	1	1	1	2	2	1	1	0	1	24	0	2	0	0	1	#NULL!
203	7	2	2	54	0	26	2	5	2		2	1	0	#NULL!	0	#NULL!	3	#NULL!	#NULL!	1	65	0	0	1	1	0	4	2	1	2	4	2	1	0	1	65	1	2	0	0	1	1
204	8	2	2	34.7	27.6644	65	2	5	2		2	1	0	#NULL!	1	#NULL!	2	1	#NULL!	1	23	0	#NULL!	1	1	0	2	1	1	2	2	1	1	0	1	23	1	3	0	0	1	1
205	7	2	2	#NULL!	#NULL!	#NULL!	#NULL!	#NULL!	#NULL!	白紫+奈达铂	2	1	2	1	0	#NULL!	1	#NULL!	#NULL!	1	18	0	0	2	1	1	3	2	2	2	3	2	1	0	1	18	0	2	0	0	1	#NULL!
206	3	2	2	#NULL!	#NULL!	12	1	3	1	替吉奥+顺铂	2	1	2	1	0	#NULL!	2	#NULL!	#NULL!	1	31	1	#NULL!	2	2	0	3	2	0	1	1	1	1	0	1	38	1	2	0	0	1	0
207	3	2	2	#NULL!	#NULL!	#NULL!	#NULL!	#NULL!	#NULL!	紫杉醇+奈达铂	2	1	2	1	0	#NULL!	1	#NULL!	#NULL!		4	0	0	1	1	0	3	2	2	2	3	2	1	0	1	4	0	2	0	0	1	#NULL!
208	3	2	2	#NULL!	#NULL!	#NULL!	#NULL!	#NULL!	#NULL!		#NULL!	#NULL!	0	#NULL!	0	#NULL!	#NULL!	1	#NULL!		2	1	#NULL!	1	2	1	2	1	1	2	3	2	0	0	1	21	1	2	1	0	1	#NULL!
209	6	2	2	39.5752	13.16	52.7353	2	3	1		2	1	0	#NULL!	0	#NULL!	2	#NULL!	#NULL!	1	8	0	0	1	1	0	4	2	2	2	4	2	1	0	1	8	1	2	0	0	1	0
210	1	2	2	#NULL!	#NULL!	#NULL!	#NULL!	#NULL!	#NULL!	雷替曲赛+顺铂	2	#NULL!	#NULL!	#NULL!	#NULL!	#NULL!	#NULL!	#NULL!	#NULL!		25	0	0	1	2	1	4	2	1	2	4	2	1	0	1	25	0	2	0	0	1	#NULL!
211	1	2	2	#NULL!	#NULL!	#NULL!	#NULL!	#NULL!	#NULL!	奈达铂+氟尿嘧啶	2	1	2	1	0	#NULL!	3	#NULL!	#NULL!	1	15	1	#NULL!	2	1	1	4	2	1	2	3	2	1	0	1	25	1	2	0	0	1	#NULL!
212	1	2	2	#NULL!	#NULL!	44	2	6	2	多西紫衫醇+奈达铂	2	#NULL!	#NULL!	#NULL!	#NULL!	#NULL!	#NULL!	#NULL!	#NULL!		10	1	#NULL!	1	1	0	4	2	0	1	4	2	1	0	1	11	1	2	0	0	1	1
213	1	2	2	#NULL!	#NULL!	#NULL!	#NULL!	#NULL!	#NULL!	替吉奥	1	2	0	#NULL!	0	#NULL!	0	#NULL!	#NULL!	1	5	0	0	1	2	0	4	2	2	2	3	2	1	0	1	5	0	2	1	0	1	#NULL!
214	1	2	2	#NULL!	#NULL!	#NULL!	#NULL!	#NULL!	#NULL!	替吉奥	1	#NULL!	1	1	0	#NULL!	0	#NULL!	#NULL!		37	0	0	1	2	0	4	2	2	2	3	2	1	0	1	37	0	2	0	0	1	#NULL!
215	8	2	2	#NULL!	#NULL!	#NULL!	#NULL!	#NULL!	#NULL!	TP	2	1	0	#NULL!	0	#NULL!	0	#NULL!	#NULL!	1	19	1	#NULL!	1	1	0	3	2	0	1	1	1	1	0	1	28	1	2	0	0	1	#NULL!
216	4	2	2	#NULL!	#NULL!	#NULL!	#NULL!	#NULL!	#NULL!	TP	2	1	1	1	0	#NULL!	0	#NULL!	#NULL!	1	29	0	0	1	1	0	3	2	1	2	3	2	1	0	1	29	0	3	1	0	1	#NULL!
217	1	2	1	#NULL!	#NULL!	#NULL!	#NULL!	#NULL!	#NULL!		#NULL!	#NULL!	0	#NULL!	0	#NULL!	#NULL!	#NULL!	#NULL!	1	16	0	0	1	1	0	2	1	1	2	3	2	0	0	1	16	1	2	1	0	1	#NULL!
218	4	2	1	#NULL!	#NULL!	#NULL!	#NULL!	#NULL!	#NULL!	洛铂	1	#NULL!	0	#NULL!	0	#NULL!	0	1	#NULL!		15	1	#NULL!	1	1	1	4	2	2	2	2	1	1	0	1	22	1	3	1	1	1	#NULL!
219	6	2	1	75.7027	5.14345	80.8461	2	6	2		2	1	1	1	0	#NULL!	3	#NULL!	#NULL!	1	45	0	0	2	1	0	2	1	1	2	3	2	1	0	1	45	0	2	0	0	1	1
220	8	2	1	13.0367	#NULL!	13.0367	1	3	1		2	1	1	1	0	#NULL!	3	#NULL!	#NULL!	2	40	0	0	1	2	0	2	1	0	1	1	1	1	0	1	40	0	2	0	0	1	0
221	7	2	1	#NULL!	#NULL!	#NULL!	#NULL!	#NULL!	#NULL!	紫杉醇+奈达铂	2	2	0	#NULL!	0	#NULL!	0	#NULL!	#NULL!		17	1	#NULL!	1	1	1	4	2	2	2	3	2	1	0	1	20	1	2	1	0	1	#NULL!
222	8	2	1	#NULL!	#NULL!	#NULL!	#NULL!	#NULL!	#NULL!	TP	2	2	0	#NULL!	0	#NULL!	2	#NULL!	#NULL!	1	21	1	#NULL!	2	1	0	3	2	2	2	3	2	1	0	1	31	0	2	0	0	1	#NULL!
223	6	2	1	#NULL!	#NULL!	#NULL!	#NULL!	#NULL!	#NULL!		2	#NULL!	3	2	0	#NULL!	#NULL!	#NULL!	#NULL!	1	37	0	#NULL!	2	2	0	1	1	2	2	2	1	1	0	1	37	0	2	0	0	1	#NULL!
224	8	2	1	#NULL!	#NULL!	#NULL!	#NULL!	#NULL!	#NULL!		2	#NULL!	2	1	1	#NULL!	1	#NULL!	#NULL!		34	0	0	1	2	1	4	2	2	2	3	2	1	0	1	34	0	2	0	0	1	#NULL!
225	4	2	1	#NULL!	#NULL!	#NULL!	#NULL!	#NULL!	#NULL!	TP	2	1	2	1	0	#NULL!	1	#NULL!	#NULL!	2	32	0	0	2	1	1	4	2	2	2	3	2	1	0	1	32	0	2	0	0	1	#NULL!
226	8	2	1	#NULL!	#NULL!	#NULL!	#NULL!	#NULL!	#NULL!	TP	2	#NULL!	0	#NULL!	1	#NULL!	0	#NULL!	#NULL!	1	12	1	#NULL!	1	1	1	3	2	1	2	3	2	1	0	1	33	0	3	0	0	1	#NULL!
227	8	2	1	#NULL!	#NULL!	#NULL!	#NULL!	#NULL!	#NULL!	同步替加氟	1	1	0	#NULL!	0	#NULL!	0	#NULL!	#NULL!	1	20	0	0	1	1	0	2	1	0	1	1	1	1	0	1	45	0	3	0	0	1	#NULL!
228	3	2	1	#NULL!	#NULL!	46	2	6	2	单药多西	1	1	0	#NULL!	0	#NULL!	#NULL!	3	1		3	1	#NULL!	2	2	0	2	1	2	2	2	1	1	0	1	6	1	3	1	0	1	1
229	2	2	1	#NULL!	#NULL!	#NULL!	#NULL!	#NULL!	#NULL!	TPF	2	2	0	#NULL!	0	#NULL!	3	#NULL!	#NULL!	1	10	1	#NULL!	1	2	1	3	2	2	2	3	2	1	0	1	21	1	3	0	0	1	#NULL!
230	7	2	1	#NULL!	#NULL!	#NULL!	#NULL!	#NULL!	#NULL!	紫杉醇+奈达铂，Q2M	2	1	2	1	0	#NULL!	1	#NULL!	#NULL!	1	10	0	0	2	1	1	3	2	0	1	3	2	1	0	1	10	0	2	0	0	1	#NULL!
231	7	2	1	#NULL!	#NULL!	#NULL!	#NULL!	#NULL!	#NULL!		1	#NULL!	2	1	0	#NULL!	0	#NULL!	2	2	12	1	#NULL!	2	1	0	1	1	2	2	2	1	1	0	1	17	0	2	0	0	1	#NULL!
232	8	2	1	#NULL!	#NULL!	#NULL!	#NULL!	#NULL!	#NULL!	多西他赛+奥沙利铂	2	1	2	1	0	#NULL!	4	#NULL!	#NULL!	1	7	1	#NULL!	2	1	0	4	2	0	1	3	2	1	0	1	16	0	2	0	0	1	#NULL!
233	4	2	1	#NULL!	#NULL!	#NULL!	#NULL!	#NULL!	#NULL!	替吉奥+CF	2	#NULL!	1	1	0	#NULL!	0	#NULL!	#NULL!	2	27	1	#NULL!	1	1	1	3	2	1	2	3	2	1	0	1	46	1	3	1	0	1	#NULL!
234	1	2	1	#NULL!	#NULL!	#NULL!	#NULL!	#NULL!	#NULL!	多西紫杉醇+顺铂	2	#NULL!	#NULL!	#NULL!	#NULL!	#NULL!	#NULL!	#NULL!	#NULL!		21	0	0	2	1	1	4	2	0	1	4	2	1	0	1	25	0	3	0	0	1	#NULL!
235	7	2	1	#NULL!	#NULL!	#NULL!	#NULL!	#NULL!	#NULL!	替吉奥+奈达铂	2	#NULL!	#NULL!	#NULL!	#NULL!	#NULL!	1	#NULL!	#NULL!	2	22	0	#NULL!	2	1	1	3	2	2	2	3	2	1	0	1	22	1	3	1	0	1	#NULL!
236	6	2	1	22.6712	#NULL!	22.6712	1	2	1		2	1	0	#NULL!	0	#NULL!	1	1	#NULL!	2	7	1	#NULL!	1	1	0	3	2	0	1	4	2	1	0	1	11	1	2	0	0	1	0
237	8	2	1	#NULL!	#NULL!	#NULL!	#NULL!	#NULL!	#NULL!	紫杉醇+奈达铂	2	1	2	1	0	#NULL!	1	1	#NULL!		15	1	#NULL!	1	1	1	4	2	2	2	3	2	1	0	1	23	1	2	1	1	1	#NULL!
238	4	2	1	#NULL!	#NULL!	#NULL!	#NULL!	#NULL!	#NULL!	TP	2	1	0	#NULL!	0	#NULL!	1	#NULL!	#NULL!	1	14	1	#NULL!	1	1	1	4	2	2	2	3	2	1	0	1	23	1	2	1	0	1	#NULL!
239	6	2	1	38.4142	#NULL!	38.4142	2	4	1		2	1	0	#NULL!	0	#NULL!	1	#NULL!	#NULL!	1	50	0	0	1	1	0	2	1	2	2	3	2	1	0	1	50	0	2	0	0	1	0
240	1	2	1	#NULL!	#NULL!	#NULL!	#NULL!	#NULL!	#NULL!		#NULL!	1	0	#NULL!	0	#NULL!	#NULL!	#NULL!	#NULL!		71	1	#NULL!	1	1	0	2	1	1	2	2	1	1	0	1	84	0	2	1	0	1	#NULL!
241	3	2	1	66.3722	6.12	72.4922	2	5	2		2	1	1	1	1	#NULL!	0	#NULL!	#NULL!	2	37	0	0	1	2	0	4	2	1	2	4	2	1	0	1	37	0	3	0	0	1	1
242	1	2	1	#NULL!	#NULL!	#NULL!	#NULL!	#NULL!	#NULL!	顺铂+替吉奥	2	1	0	#NULL!	0	#NULL!	0	#NULL!	#NULL!	1	17	1	#NULL!	1	1	0	3	2	1	2	3	2	1	0	1	26	0	2	1	0	1	#NULL!
243	5	2	1	#NULL!	#NULL!	#NULL!	#NULL!	#NULL!	#NULL!	多西+奈达铂，周方案	2	#NULL!	#NULL!	#NULL!	#NULL!	#NULL!	#NULL!	1	#NULL!	1	8	1	#NULL!	2	1	0	3	2	2	2	3	2	1	0	1	13	1	3	1	0	1	#NULL!
244	3	2	1	22.1968	#NULL!	22.1968	1	4.5	1		2	1	3	2	0	#NULL!	3	2	#NULL!	2	9	1	#NULL!	1	1	0	4	2	1	2	4	2	1	0	1	18	1	2	0	0	1	0
245	6	2	1	#NULL!	#NULL!	#NULL!	#NULL!	#NULL!	#NULL!	T	1	2	2	1	0	#NULL!	2	#NULL!	#NULL!	1	21	1	#NULL!	2	1	0	3	2	1	2	3	2	1	0	1	30	1	2	0	0	1	#NULL!
246	6	2	1	#NULL!	#NULL!	#NULL!	#NULL!	#NULL!	#NULL!		#NULL!	1	0	#NULL!	0	#NULL!	#NULL!	#NULL!	#NULL!	1	78	0	#NULL!	2	1	0	4	2	0	1	4	2	1	0	1	78	0	2	0	0	1	#NULL!
247	3	2	1	#NULL!	#NULL!	#NULL!	#NULL!	#NULL!	#NULL!	TP	2	#NULL!	0	#NULL!	0	#NULL!	1	#NULL!	#NULL!	1	107	0	#NULL!	1	1	0	1	1	3	2	3	2	1	0	1	107	0	2	1	0	1	#NULL!
248	6	2	1	#NULL!	#NULL!	#NULL!	#NULL!	#NULL!	#NULL!		#NULL!	#NULL!	2	1	0	#NULL!	0	#NULL!	#NULL!		2	1	#NULL!	1	1	0	3	2	2	2	2	1	0	0	1	14	0	2	1	1	1	#NULL!
249	8	2	1	#NULL!	#NULL!	#NULL!	#NULL!	#NULL!	#NULL!	TP	2	#NULL!	2	1	0	#NULL!	1	#NULL!	#NULL!	1	106	0	#NULL!	1	1	1	1	1	1	2	3	2	1	0	1	106	0	2	0	0	1	#NULL!
250	8	2	1	#NULL!	#NULL!	#NULL!	#NULL!	#NULL!	#NULL!	紫杉醇+奈达铂	2	2	3	2	0	#NULL!	1	#NULL!	#NULL!		8	1	#NULL!	1	1	0	3	2	2	2	2	1	1	0	1	12	0	3	1	1	1	#NULL!
251	8	2	1	#NULL!	#NULL!	51	2	7	2		#NULL!	#NULL!	3	2	0	#NULL!	0	#NULL!	#NULL!		2	0	0	1	1	0	2	1	2	2	2	1	0	0	1	2	0	2	1	1	1	1
252	7	2	1	#NULL!	#NULL!	#NULL!	#NULL!	#NULL!	#NULL!		#NULL!	#NULL!	1	1	0	#NULL!	0	#NULL!	#NULL!		9	0	0	1	1	1	4	2	2	2	3	2	0	0	1	9	0	2	0	1	1	#NULL!
253	3	2	1	#NULL!	#NULL!	#NULL!	#NULL!	#NULL!	#NULL!		#NULL!	#NULL!	2	1	0	#NULL!	0	#NULL!	#NULL!	1	3	1	#NULL!	1	1	1	3	2	2	2	3	2	0	0	1	8	0	2	1	1	1	#NULL!
254	7	1	1	#NULL!	#NULL!	#NULL!	#NULL!	#NULL!	#NULL!		#NULL!	#NULL!	#NULL!	#NULL!	#NULL!	#NULL!	#NULL!	#NULL!	#NULL!		9	1	#NULL!	1	2	0	3	2	2	2	3	2	0	0	1	12	0	2	1	1	1	#NULL!
255	8	2	2	20.6955	#NULL!	20.6955	1	4	1		2	1	1	1	0	#NULL!	2	2	#NULL!	1	7	1	#NULL!	1	1	0	2	1	1	2	2	1	1	0	1	22	1	2	0	0	1	0
256	5	2	2	#NULL!	#NULL!	#NULL!	#NULL!	#NULL!	#NULL!		2	#NULL!	0	#NULL!	0	#NULL!	#NULL!	#NULL!	#NULL!	1	96	0	#NULL!	2	2	1	2	1	0	1	1	1	1	0	1	96	1	2	0	0	1	#NULL!
257	8	2	2	18.8224	7.73558	26.558	2	4	1		#NULL!	#NULL!	1	1	0	#NULL!	3	2	#NULL!	2	10	1	#NULL!	1	2	0	4	2	0	1	4	2	0	0	1	15	1	2	0	0	1	0
258	7	2	2	#NULL!	#NULL!	54	2	6	2		#NULL!	#NULL!	1	1	0	#NULL!	0	#NULL!	#NULL!	1	6	0	#NULL!	1	2	0	3	2	2	2	3	2	0	0	1	6	0	2	1	0	1	1
259	2	2	2	#NULL!	#NULL!	#NULL!	#NULL!	#NULL!	#NULL!	PF	2	1	1	1	0	#NULL!	0	#NULL!	#NULL!	1	12	1	#NULL!	1	1	0	3	2	1	2	3	2	1	0	1	56	0	3	1	0	1	#NULL!
260	8	2	2	#NULL!	#NULL!	55	2	6	2	紫杉醇+奈达铂	2	2	1	1	0	#NULL!	0	2	1		1	1	#NULL!	2	1	1	3	2	2	2	3	2	1	0	1	6	1	2	1	0	1	1
261	4	2	1	#NULL!	#NULL!	#NULL!	#NULL!	#NULL!	#NULL!	顺铂+替吉奥	2	1	1	1	1	#NULL!	0	#NULL!	#NULL!	2	11	1	#NULL!	1	2	1	3	2	1	2	3	2	1	0	1	19	1	3	0	0	1	#NULL!
262	7	2	2	#NULL!	#NULL!	#NULL!	#NULL!	#NULL!	#NULL!	白蛋白紫杉醇+泰欣生	1	1	0	#NULL!	0	#NULL!	0	#NULL!	#NULL!	1	15	0	0	1	2	1	4	2	2	2	3	2	1	0	1	15	1	3	0	0	1	#NULL!
263	5	2	2	25.115	#NULL!	25.115	2	3	1		2	1	1	1	1	#NULL!	3	#NULL!	#NULL!	2	21	0	0	1	2	0	4	2	2	2	4	2	1	0	1	21	1	2	0	1	1	0
264	6	2	2	25.1342	#NULL!	25.1342	2	4	1		2	1	1	1	0	#NULL!	3	#NULL!	#NULL!	1	48	0	0	1	2	0	4	2	2	2	4	2	1	0	1	48	1	3	0	0	1	0
265	6	2	2	58.6666	2.18201	60.8486	2	5	2		2	1	1	1	0	#NULL!	1	2	#NULL!	1	10	1	#NULL!	1	2	0	4	2	2	2	4	2	1	0	1	79	0	3	0	0	1	1
266	5	2	2	#NULL!	#NULL!	#NULL!	#NULL!	#NULL!	#NULL!	紫杉醇+奈达铂	2	2	2	1	0	#NULL!	1	1	#NULL!	1	33	1	#NULL!	2	2	1	4	2	2	2	3	2	1	0	1	42	0	2	1	1	1	#NULL!
267	1	2	2	#NULL!	#NULL!	#NULL!	#NULL!	#NULL!	#NULL!	多西紫杉醇+顺铂	2	#NULL!	#NULL!	#NULL!	#NULL!	#NULL!	#NULL!	#NULL!	#NULL!		42	0	#NULL!	1	1	1	3	2	0	1	2	1	1	0	1	32	1	3	0	0	1	#NULL!
268	4	2	2	#NULL!	#NULL!	#NULL!	#NULL!	#NULL!	#NULL!	紫杉醇+奈达铂	2	1	0	#NULL!	0	#NULL!	0	1	#NULL!	2	15	1	#NULL!	1	2	0	4	2	2	2	3	2	1	0	1	24	1	2	1	1	1	#NULL!
269	1	2	2	#NULL!	#NULL!	#NULL!	#NULL!	#NULL!	#NULL!		#NULL!	#NULL!	0	#NULL!	0	#NULL!	0	#NULL!	#NULL!		8	1	#NULL!	2	2	0	4	2	2	2	3	2	0	0	1	12	0	3	1	1	1	#NULL!
270	5	1	2	#NULL!	#NULL!	#NULL!	#NULL!	#NULL!	#NULL!	TP	2	1	0	#NULL!	0	#NULL!	0	#NULL!	#NULL!	1	19	0	#NULL!	1	1	1	4	2	2	2	3	2	1	0	1	19	1	3	1	0	1	#NULL!
271	5	2	2	#NULL!	#NULL!	#NULL!	#NULL!	#NULL!	#NULL!	洛铂	1	2	3	2	0	#NULL!	1	1	#NULL!		1	1	#NULL!	1	1	1	3	2	2	2	2	1	0	0	1	1	1	3	0	0	1	#NULL!
272	3	2	2	#NULL!	#NULL!	#NULL!	#NULL!	#NULL!	#NULL!	洛铂	1	1	1	1	0	#NULL!	0	#NULL!	#NULL!		4	1	#NULL!	1	1	1	4	2	2	2	4	2	1	0	1	7	1	3	1	1	1	#NULL!
273	1	1	2	#NULL!	#NULL!	#NULL!	#NULL!	#NULL!	#NULL!	替吉奥+泰欣生	1	#NULL!	3	2	#NULL!	#NULL!	#NULL!	#NULL!	#NULL!		10	1	#NULL!	2	2	1	3	2	2	2	3	2	1	0	1	22	0	2	0	0	1	#NULL!
274	8	2	2	#NULL!	#NULL!	11	1	2	1	TP	2	1	3	2	3	#NULL!	1	#NULL!	#NULL!	1	90	0	#NULL!	2	1	0	1	1	1	2	2	1	1	0	1	90	1	3	0	1	1	0
275	6	2	2	30.3	3.92872	34.2287	2	8	2		2	1	1	1	0	#NULL!	3	#NULL!	#NULL!	1	14	1	#NULL!	1	1	0	4	2	0	1	2	1	1	0	1	55	0	2	0	1	1	1
276	8	2	2	6.2419	0	6.2419	1	3	1		2	1	1	1	0	#NULL!	3	3	1	1	6	1	#NULL!	1	1	0	2	1	1	2	2	1	1	0	1	19	1	2	0	1	1	0
277	5	2	2	#NULL!	#NULL!	#NULL!	#NULL!	#NULL!	#NULL!	紫杉醇+奈达铂	2	1	2	1	1	#NULL!	3	#NULL!	#NULL!		14	1	#NULL!	1	1	1	4	2	2	2	3	2	1	0	1	25	1	2	1	1	1	#NULL!
278	6	2	2	#NULL!	#NULL!	#NULL!	#NULL!	#NULL!	#NULL!	替吉奥	1	#NULL!	0	#NULL!	0	#NULL!	0	#NULL!	#NULL!	1	30	0	0	1	2	0	4	2	2	2	3	2	1	0	1	30	0	3	1	1	1	#NULL!
279	3	2	2	12.7928	1.97414	14.7669	1	5	2		2	1	1	1	0	#NULL!	2	1	#NULL!	2	5	1	#NULL!	2	1	0	4	2	0	1	4	2	1	0	1	45	0	2	0	1	1	1
280	3	2	2	22.632	#NULL!	22.632	1	4	1		2	1	1	1	0	#NULL!	4	#NULL!	#NULL!	1	12	0	#NULL!	2	1	0	4	2	1	2	4	2	1	0	1	12	1	2	0	1	1	0
281	8	2	2	130.583	12.1754	142.758	2	8	2		2	2	2	1	0	#NULL!	3	#NULL!	#NULL!	1	33	0	0	1	1	0	2	1	0	1	1	1	1	0	1	61	0	2	0	1	1	1
282	5	2	2	#NULL!	#NULL!	#NULL!	#NULL!	#NULL!	#NULL!	替吉奥+泰欣生	1	#NULL!	2	1	#NULL!	#NULL!	#NULL!	#NULL!	#NULL!		66	0	0	1	2	0	3	2	0	1	2	1	1	0	1	66	0	2	0	1	1	#NULL!
283	2	2	2	#NULL!	#NULL!	63	2	6	2	PF	2	#NULL!	#NULL!	#NULL!	#NULL!	#NULL!	#NULL!	#NULL!	#NULL!		#NULL!	0	0	1	1	1	2	1	2	2	3	2	1	0	1	25.0667	1	2	#NULL!	#NULL!	#NULL!	1
284	6	2	2	#NULL!	#NULL!	22	1	3	1	PF	2	#NULL!	#NULL!	#NULL!	#NULL!	#NULL!	#NULL!	#NULL!	#NULL!		#NULL!	0	#NULL!	1	1	1	4	2	1	2	3	2	1	0	1	11.2333	1	3	#NULL!	#NULL!	#NULL!	0
285	8	2	1	#NULL!	#NULL!	4	1	5	2	PF	2	#NULL!	#NULL!	#NULL!	#NULL!	#NULL!	#NULL!	#NULL!	#NULL!		#NULL!	0	0	1	1	0	2	1	0	1	1	1	1	0	1	106.267	1	2	#NULL!	#NULL!	#NULL!	1
286	7	2	2	#NULL!	#NULL!	21	1	3	1	PF	2	1	#NULL!	#NULL!	#NULL!	#NULL!	#NULL!	#NULL!	#NULL!		#NULL!	0	0	1	1	0	3	2	1	2	3	2	1	0	1	18.3	1	2	#NULL!	#NULL!	#NULL!	0
287	6	2	2	#NULL!	#NULL!	28	2	7	2	8	2	#NULL!	#NULL!	#NULL!	#NULL!	#NULL!	#NULL!	#NULL!	#NULL!		#NULL!	0	0	1	1	1	3	2	1	2	3	2	1	0	1	26.5	1	3	#NULL!	#NULL!	#NULL!	1
288	2	2	2	#NULL!	#NULL!	25	2	5	2	TPF多西他赛+奥沙利铂+5-fu	2	#NULL!	#NULL!	#NULL!	#NULL!	#NULL!	#NULL!	#NULL!	#NULL!		#NULL!	0	0	1	1	0	4	2	0	1	3	2	1	0	1	11.3667	1	3	#NULL!	#NULL!	#NULL!	1
289	3	2	2	#NULL!	#NULL!	21	1	3	1	TF	2	#NULL!	#NULL!	#NULL!	#NULL!	#NULL!	#NULL!	#NULL!	#NULL!		#NULL!	0	#NULL!	1	1	0	2	1	1	2	2	1	1	0	1	80.5667	1	2	#NULL!	#NULL!	#NULL!	0
290	7	2	2	#NULL!	#NULL!	31	2	3	1	泰新生	#NULL!	#NULL!	#NULL!	#NULL!	#NULL!	#NULL!	#NULL!	#NULL!	#NULL!		#NULL!	0	0	1	1	1	4	2	2	2	3	2	0	0	1	106.233	1	2	#NULL!	#NULL!	#NULL!	0
291	2	1	2	#NULL!	#NULL!	30	2	7.5	2	PF	2	#NULL!	#NULL!	#NULL!	#NULL!	#NULL!	#NULL!	#NULL!	#NULL!		#NULL!	1	#NULL!	1	1	0	4	2	2	2	3	2	1	0	1	5.2	1	2	#NULL!	#NULL!	#NULL!	1
292	1	2	2	#NULL!	#NULL!	14	1	11.6	2	PF	2	#NULL!	#NULL!	#NULL!	#NULL!	#NULL!	#NULL!	#NULL!	#NULL!		#NULL!	0	0	1	1	0	4	2	3	2	3	2	1	0	1	51.9667	1	3	#NULL!	#NULL!	#NULL!	1
293	1	2	2	#NULL!	#NULL!	#NULL!	#NULL!	8.5	2	TP	2	1	#NULL!	#NULL!	#NULL!	#NULL!	#NULL!	#NULL!	#NULL!		#NULL!	1	#NULL!	1	1	1	2	1	1	2	2	1	1	0	1	47.7	1	3	#NULL!	#NULL!	#NULL!	1
294	5	2	2	#NULL!	#NULL!	28	2	3.5	1	0	#NULL!	1	#NULL!	#NULL!	#NULL!	#NULL!	#NULL!	#NULL!	#NULL!		#NULL!	1	#NULL!	2	1	0	4	2	1	2	3	2	0	0	1	15.8333	1	2	#NULL!	#NULL!	#NULL!	0
295	8	1	1	#NULL!	#NULL!	19	1	3	1	PF	2	#NULL!	#NULL!	#NULL!	#NULL!	#NULL!	#NULL!	#NULL!	#NULL!		#NULL!	1	#NULL!	1	1	1	2	1	1	2	2	1	1	0	1	71.3333	1	2	#NULL!	#NULL!	#NULL!	0
296	8	2	1	#NULL!	#NULL!	11	1	4	1	PF	2	#NULL!	#NULL!	#NULL!	#NULL!	#NULL!	#NULL!	#NULL!	#NULL!		#NULL!	0	#NULL!	1	1	0	4	2	1	2	3	2	1	0	1	1.86667	1	2	#NULL!	#NULL!	#NULL!	0
297	1	2	1	#NULL!	#NULL!	20	1	6.5	2	TP	2	1	#NULL!	#NULL!	#NULL!	#NULL!	#NULL!	#NULL!	#NULL!		#NULL!	1	#NULL!	1	1	0	2	1	3	2	3	2	1	0	1	66.6	1	3	#NULL!	#NULL!	#NULL!	1
298	8	1	2	#NULL!	#NULL!	49	2	8	2	TP	2	#NULL!	#NULL!	#NULL!	#NULL!	#NULL!	#NULL!	#NULL!	#NULL!		#NULL!	1	#NULL!	1	1	1	4	2	0	1	3	2	1	0	1	74.4667	1	2	#NULL!	#NULL!	#NULL!	1
299	4	1	2	#NULL!	#NULL!	32	2	3.5	1	0	#NULL!	#NULL!	#NULL!	#NULL!	#NULL!	#NULL!	#NULL!	#NULL!	#NULL!		#NULL!	1	#NULL!	2	1	1	2	1	1	2	2	1	0	0	1	2.13333	1	2	#NULL!	#NULL!	#NULL!	0
300	6	2	2	#NULL!	#NULL!	33	2	9	2	PF	2	#NULL!	#NULL!	#NULL!	#NULL!	#NULL!	#NULL!	#NULL!	#NULL!		#NULL!	0	0	1	1	0	2	1	1	2	2	1	1	0	1	78.6333	1	3	#NULL!	#NULL!	#NULL!	1
301	3	2	2	#NULL!	#NULL!	19	1	6	2	TP	2	1	#NULL!	#NULL!	#NULL!	#NULL!	#NULL!	#NULL!	#NULL!		#NULL!	0	0	1	1	0	2	1	2	2	3	2	1	0	1	79.8	1	2	#NULL!	#NULL!	#NULL!	1
302	4	2	2	#NULL!	#NULL!	11	1	4	1	PF	2	1	#NULL!	#NULL!	#NULL!	#NULL!	#NULL!	#NULL!	#NULL!		#NULL!	0	0	1	1	1	2	1	0	1	1	1	1	0	1	63.9	1	2	#NULL!	#NULL!	#NULL!	0
303	5	2	1	#NULL!	#NULL!	13	1	8	2	TF	2	#NULL!	#NULL!	#NULL!	#NULL!	#NULL!	#NULL!	#NULL!	#NULL!		#NULL!	1	#NULL!	2	1	1	2	1	2	2	3	2	1	0	1	38.7333	1	2	#NULL!	#NULL!	#NULL!	1
304	4	2	2	#NULL!	#NULL!	11	1	2.6	1	tp	2	1	#NULL!	#NULL!	#NULL!	#NULL!	#NULL!	#NULL!	#NULL!		#NULL!	0	0	1	1	1	3	2	2	2	3	2	1	0	1	9.9	1	3	#NULL!	#NULL!	#NULL!	0
305	4	2	1	#NULL!	#NULL!	18	1	2.5	1	PF	2	#NULL!	#NULL!	#NULL!	#NULL!	#NULL!	#NULL!	#NULL!	#NULL!		#NULL!	1	#NULL!	1	1	0	3	2	2	2	3	2	1	0	1	6.16667	1	3	#NULL!	#NULL!	#NULL!	0
306	8	2	2	#NULL!	#NULL!	#NULL!	#NULL!	8	2	TP	2	1	#NULL!	#NULL!	#NULL!	#NULL!	#NULL!	#NULL!	#NULL!		#NULL!	0	0	1	1	0	2	1	1	2	2	1	1	0	1	8.2	1	3	#NULL!	#NULL!	#NULL!	1
307	8	2	2	#NULL!	#NULL!	11	1	2	1	PF	2	#NULL!	#NULL!	#NULL!	#NULL!	#NULL!	#NULL!	#NULL!	#NULL!		#NULL!	0	0	1	1	1	3	2	2	2	3	2	1	0	1	103.867	1	2	#NULL!	#NULL!	#NULL!	0
308	7	2	2	#NULL!	#NULL!	25	2	7.5	2	泰新生	#NULL!	#NULL!	#NULL!	#NULL!	#NULL!	#NULL!	#NULL!	#NULL!	#NULL!		#NULL!	0	0	1	1	1	3	2	2	2	3	2	0	0	1	36.6	1	3	#NULL!	#NULL!	#NULL!	1
309	8	2	2	#NULL!	#NULL!	13	1	6	2	TF	2	1	#NULL!	#NULL!	#NULL!	#NULL!	#NULL!	#NULL!	#NULL!		#NULL!	1	#NULL!	1	1	0	4	2	1	2	3	2	1	0	1	100.133	1	2	#NULL!	#NULL!	#NULL!	1
310	6	2	2	#NULL!	#NULL!	29	2	12	2	TF	2	2	#NULL!	#NULL!	#NULL!	#NULL!	#NULL!	#NULL!	#NULL!		#NULL!	0	0	1	1	1	4	2	2	2	3	2	1	0	1	52.2667	1	2	#NULL!	#NULL!	#NULL!	1
311	3	2	2	#NULL!	#NULL!	9	1	2.5	1	tp	2	1	#NULL!	#NULL!	#NULL!	#NULL!	#NULL!	#NULL!	#NULL!		#NULL!	0	0	1	1	0	4	2	2	2	3	2	1	0	1	37.4	1	3	#NULL!	#NULL!	#NULL!	0
312	8	2	2	#NULL!	#NULL!	20	1	5	2	tp	2	1	#NULL!	#NULL!	#NULL!	#NULL!	#NULL!	#NULL!	#NULL!		#NULL!	0	0	1	1	0	4	2	2	2	3	2	1	0	1	68.9	1	3	#NULL!	#NULL!	#NULL!	1
313	3	2	2	#NULL!	#NULL!	18	1	10	2	tp	2	2	#NULL!	#NULL!	#NULL!	#NULL!	#NULL!	#NULL!	#NULL!		#NULL!	0	0	1	1	0	2	1	1	2	3	2	1	0	1	8.43333	1	3	#NULL!	#NULL!	#NULL!	1
314	2	1	2	#NULL!	#NULL!	10	1	3	1	TF	2	2	#NULL!	#NULL!	#NULL!	#NULL!	#NULL!	#NULL!	#NULL!		#NULL!	0	0	1	1	0	4	2	1	2	3	2	1	0	1	58.0333	1	2	#NULL!	#NULL!	#NULL!	0
315	8	2	2	#NULL!	#NULL!	12	1	5	2	TF	2	2	#NULL!	#NULL!	#NULL!	#NULL!	#NULL!	#NULL!	#NULL!		#NULL!	0	0	2	1	0	4	2	1	2	3	2	1	0	1	95.1667	1	2	#NULL!	#NULL!	#NULL!	1
316	1	2	1	#NULL!	#NULL!	15	1	8	2	TP	2	1	#NULL!	#NULL!	#NULL!	#NULL!	#NULL!	#NULL!	#NULL!		#NULL!	1	#NULL!	1	1	1	4	2	1	2	3	2	1	0	1	48.0667	1	2	#NULL!	#NULL!	#NULL!	1
317	8	2	2	#NULL!	#NULL!	8	1	2.5	1	泰新生	#NULL!	#NULL!	#NULL!	#NULL!	#NULL!	#NULL!	#NULL!	#NULL!	#NULL!		#NULL!	0	0	1	1	0	4	2	1	2	3	2	0	0	1	66.0333	1	3	#NULL!	#NULL!	#NULL!	0
318	1	2	2	#NULL!	#NULL!	19	1	5.5	2	TP	2	1	#NULL!	#NULL!	#NULL!	#NULL!	#NULL!	#NULL!	#NULL!		#NULL!	1	#NULL!	1	1	0	4	2	2	2	3	2	1	0	1	55.1	1	3	#NULL!	#NULL!	#NULL!	1
319	6	2	2	#NULL!	#NULL!	11	1	4	1	0	#NULL!	1	#NULL!	#NULL!	#NULL!	#NULL!	#NULL!	#NULL!	#NULL!		#NULL!	1	#NULL!	1	1	0	2	1	2	2	3	2	0	0	1	16.0333	1	2	#NULL!	#NULL!	#NULL!	0
320	8	2	2	#NULL!	#NULL!	29	2	7	2	PF	2	1	#NULL!	#NULL!	#NULL!	#NULL!	#NULL!	#NULL!	#NULL!		#NULL!	0	0	1	1	1	4	2	1	2	3	2	1	0	1	23.0667	1	2	#NULL!	#NULL!	#NULL!	1
321	4	2	2	#NULL!	#NULL!	#NULL!	#NULL!	6	2	PF	2	1	#NULL!	#NULL!	#NULL!	#NULL!	#NULL!	#NULL!	#NULL!		#NULL!	0	#NULL!	1	1	0	4	2	1	2	4	2	1	0	1	8.26667	1	2	#NULL!	#NULL!	#NULL!	1
322	8	2	2	#NULL!	#NULL!	24.86	2	4.5	1	TP+泰欣生	2	1	#NULL!	#NULL!	#NULL!	#NULL!	#NULL!	#NULL!	#NULL!		#NULL!	0	0	1	1	0	4	2	1	2	3	2	1	0	1	81.3333	1	3	#NULL!	#NULL!	#NULL!	0
323	4	2	2	#NULL!	#NULL!	18	1	4.2	1	PF	2	#NULL!	#NULL!	#NULL!	#NULL!	#NULL!	#NULL!	#NULL!	#NULL!		#NULL!	1	#NULL!	2	1	0	4	2	2	2	4	2	1	0	1	80.5333	1	2	#NULL!	#NULL!	#NULL!	0
324	2	2	2	#NULL!	#NULL!	30	2	7	2	FP+泰新生	2	#NULL!	#NULL!	#NULL!	#NULL!	#NULL!	#NULL!	#NULL!	#NULL!		#NULL!	0	0	2	1	1	4	2	2	2	3	2	1	0	1	54.6	1	3	#NULL!	#NULL!	#NULL!	1
325	7	2	2	#NULL!	#NULL!	45	2	5.5	2	PF	2	#NULL!	#NULL!	#NULL!	#NULL!	#NULL!	#NULL!	#NULL!	#NULL!		#NULL!	0	#NULL!	2	1	1	1	1	3	2	3	2	1	0	1	8.13333	1	3	#NULL!	#NULL!	#NULL!	1
326	8	2	1	#NULL!	#NULL!	16	1	2.5	1	TP多西他赛+奥沙利铂	2	#NULL!	#NULL!	#NULL!	#NULL!	#NULL!	#NULL!	#NULL!	#NULL!		#NULL!	1	#NULL!	2	1	0	2	1	1	2	2	1	1	0	1	110.467	1	2	#NULL!	#NULL!	#NULL!	0
327	8	2	2	#NULL!	#NULL!	29	2	3.5	1	PF	2	#NULL!	#NULL!	#NULL!	#NULL!	#NULL!	#NULL!	#NULL!	#NULL!		#NULL!	1	#NULL!	1	1	1	2	1	1	2	2	1	0	0	1	1.56667	1	3	#NULL!	#NULL!	#NULL!	0
328	8	2	2	#NULL!	#NULL!	59.51	2	13.5	2	TF多西DF	2	#NULL!	#NULL!	#NULL!	#NULL!	#NULL!	#NULL!	#NULL!	#NULL!		#NULL!	0	0	2	1	0	2	1	2	2	3	2	1	0	1	2.8	1	3	#NULL!	#NULL!	#NULL!	1
329	8	2	1	#NULL!	#NULL!	30	2	3	1	TP多西dp	2	1	#NULL!	#NULL!	#NULL!	#NULL!	#NULL!	#NULL!	#NULL!		#NULL!	0	#NULL!	1	1	1	2	1	2	2	3	2	1	0	1	102.633	1	3	#NULL!	#NULL!	#NULL!	0
330	8	2	1	#NULL!	#NULL!	21.64	1	7.5	2	TF	2	#NULL!	#NULL!	#NULL!	#NULL!	#NULL!	#NULL!	#NULL!	#NULL!		#NULL!	0	0	2	1	1	3	2	2	2	3	2	1	0	1	91.7333	1	2	#NULL!	#NULL!	#NULL!	1
331	8	2	1	#NULL!	#NULL!	77.48	2	8	2	TP+泰欣生	2	1	#NULL!	#NULL!	#NULL!	#NULL!	#NULL!	#NULL!	#NULL!		#NULL!	1	#NULL!	1	1	0	3	2	2	2	4	2	1	0	1	15.4333	1	3	#NULL!	#NULL!	#NULL!	1
332	4	1	1	#NULL!	#NULL!	18.49	1	3	1	PF	2	1	#NULL!	#NULL!	#NULL!	#NULL!	#NULL!	#NULL!	#NULL!		#NULL!	0	0	2	1	0	4	2	1	2	3	2	1	0	1	18.1667	1	3	#NULL!	#NULL!	#NULL!	0
333	8	1	2	#NULL!	#NULL!	41	2	4.8	2	PF	2	#NULL!	#NULL!	#NULL!	#NULL!	#NULL!	#NULL!	#NULL!	#NULL!		#NULL!	0	#NULL!	1	1	0	4	2	2	2	3	2	1	0	1	1.76667	1	3	#NULL!	#NULL!	#NULL!	1
334	8	1	2	#NULL!	#NULL!	26.09	2	9.5	2	泰新生	#NULL!	#NULL!	#NULL!	#NULL!	#NULL!	#NULL!	#NULL!	#NULL!	#NULL!		#NULL!	0	0	1	1	0	2	1	2	2	3	2	0	0	1	3.5	1	2	#NULL!	#NULL!	#NULL!	1
335	8	2	2	#NULL!	#NULL!	10.21	1	10	2	TF	2	#NULL!	#NULL!	#NULL!	#NULL!	#NULL!	#NULL!	#NULL!	#NULL!		#NULL!	0	0	1	1	1	4	2	0	1	3	2	1	0	1	28.9333	1	2	#NULL!	#NULL!	#NULL!	1
336	5	2	2	#NULL!	#NULL!	26.51	2	3	1	TP	2	1	#NULL!	#NULL!	#NULL!	#NULL!	#NULL!	#NULL!	#NULL!		#NULL!	0	0	2	1	0	4	2	0	1	3	2	1	0	1	57.8333	1	2	#NULL!	#NULL!	#NULL!	0
337	6	2	2	#NULL!	#NULL!	19	1	4	1	PF	2	#NULL!	#NULL!	#NULL!	#NULL!	#NULL!	#NULL!	#NULL!	#NULL!		#NULL!	1	#NULL!	1	1	0	4	2	0	1	3	2	1	0	1	78.6333	1	2	#NULL!	#NULL!	#NULL!	0
338	1	2	2	#NULL!	#NULL!	15	1	5	2	TP	2	1	#NULL!	#NULL!	#NULL!	#NULL!	#NULL!	#NULL!	#NULL!		#NULL!	1	#NULL!	1	1	1	4	2	0	1	3	2	1	0	1	92.6667	1	3	#NULL!	#NULL!	#NULL!	1
339	8	2	2	#NULL!	#NULL!	18.62	1	5	2	PF-TF	2	#NULL!	#NULL!	#NULL!	#NULL!	#NULL!	#NULL!	#NULL!	#NULL!		#NULL!	0	0	2	1	1	4	2	1	2	3	2	1	0	1	98.9667	1	2	#NULL!	#NULL!	#NULL!	1
340	8	2	2	#NULL!	#NULL!	33	2	6	2	folfox	2	1	#NULL!	#NULL!	#NULL!	#NULL!	#NULL!	#NULL!	#NULL!		#NULL!	1	#NULL!	1	1	0	4	2	2	2	3	2	1	0	1	54.8	1	2	#NULL!	#NULL!	#NULL!	1
341	5	2	2	#NULL!	#NULL!	35	2	5.5	2	0	#NULL!	1	#NULL!	#NULL!	#NULL!	#NULL!	#NULL!	#NULL!	#NULL!		#NULL!	0	0	1	1	0	2	1	1	2	2	1	0	0	1	14.8	1	2	#NULL!	#NULL!	#NULL!	1
342	2	2	1	#NULL!	#NULL!	24	2	3.5	1	PF	2	#NULL!	#NULL!	#NULL!	#NULL!	#NULL!	#NULL!	#NULL!	#NULL!		#NULL!	1	#NULL!	2	1	0	2	1	1	2	2	1	0	0	1	2.8	1	2	#NULL!	#NULL!	#NULL!	0
343	4	1	1	#NULL!	#NULL!	21	1	15	2	TF	2	#NULL!	#NULL!	#NULL!	#NULL!	#NULL!	#NULL!	#NULL!	#NULL!		#NULL!	1	#NULL!	1	1	1	2	1	2	2	3	2	1	0	1	6.53333	1	2	#NULL!	#NULL!	#NULL!	1
344	1	2	2	#NULL!	#NULL!	32.94	2	6	2	S1	1	#NULL!	#NULL!	#NULL!	#NULL!	#NULL!	#NULL!	#NULL!	#NULL!		#NULL!	1	#NULL!	1	1	0	2	1	2	2	3	2	1	0	1	58.9667	1	2	#NULL!	#NULL!	#NULL!	1
345	7	2	1	#NULL!	#NULL!	34	2	7	2	PF	2	1	#NULL!	#NULL!	#NULL!	#NULL!	#NULL!	#NULL!	#NULL!		#NULL!	0	#NULL!	2	1	1	4	2	2	2	3	2	1	0	1	9.36667	1	2	#NULL!	#NULL!	#NULL!	1
346	8	2	2	#NULL!	#NULL!	#NULL!	#NULL!	4	1	TP多西他赛+奥沙利铂	2	#NULL!	#NULL!	#NULL!	#NULL!	#NULL!	#NULL!	#NULL!	#NULL!		#NULL!	0	#NULL!	1	1	1	2	1	2	2	3	2	1	0	1	3.46667	1	2	#NULL!	#NULL!	#NULL!	0
347	6	2	2	#NULL!	#NULL!	19	1	5.5	2	TP	2	#NULL!	#NULL!	#NULL!	#NULL!	#NULL!	#NULL!	#NULL!	#NULL!		#NULL!	0	0	1	1	0	2	1	2	2	3	2	1	0	1	70.1	1	3	#NULL!	#NULL!	#NULL!	1
348	8	2	1	#NULL!	#NULL!	26	2	4.5	1	PF	2	#NULL!	#NULL!	#NULL!	#NULL!	#NULL!	#NULL!	#NULL!	#NULL!		#NULL!	0	0	1	1	1	3	2	3	2	3	2	1	0	1	103.233	1	2	#NULL!	#NULL!	#NULL!	0
349	1	2	1	#NULL!	#NULL!	#NULL!	#NULL!	2.2	1	folfox后TP	2	1	#NULL!	#NULL!	#NULL!	#NULL!	#NULL!	#NULL!	#NULL!		#NULL!	0	0	1	1	1	4	2	2	2	4	2	1	0	1	7.13333	1	2	#NULL!	#NULL!	#NULL!	0
350	6	2	2	#NULL!	#NULL!	#NULL!	#NULL!	2	1	PF	2	#NULL!	#NULL!	#NULL!	#NULL!	#NULL!	#NULL!	#NULL!	#NULL!		#NULL!	0	0	1	1	1	4	2	2	2	4	2	1	0	1	26.2	1	2	#NULL!	#NULL!	#NULL!	0
351	8	2	2	#NULL!	#NULL!	20	1	15	2	PF	2	#NULL!	#NULL!	#NULL!	#NULL!	#NULL!	#NULL!	#NULL!	#NULL!		#NULL!	0	0	2	1	0	4	2	2	2	3	2	1	0	1	79.5	1	3	#NULL!	#NULL!	#NULL!	1
352	4	2	1	#NULL!	#NULL!	9	1	5.5	2	tp	2	1	#NULL!	#NULL!	#NULL!	#NULL!	#NULL!	#NULL!	#NULL!		#NULL!	0	0	1	1	1	2	1	0	1	1	1	1	0	1	33.4333	1	3	#NULL!	#NULL!	#NULL!	1
353	8	2	1	#NULL!	#NULL!	16	1	5.5	2	PF	2	1	#NULL!	#NULL!	#NULL!	#NULL!	#NULL!	#NULL!	#NULL!		#NULL!	0	0	1	1	0	2	1	0	1	1	1	1	0	1	8.5	1	3	#NULL!	#NULL!	#NULL!	1
354	8	1	1	#NULL!	#NULL!	#NULL!	#NULL!	6	2	PF	2	#NULL!	#NULL!	#NULL!	#NULL!	#NULL!	#NULL!	#NULL!	#NULL!		#NULL!	0	0	1	1	0	2	1	2	2	4	2	1	0	1	12.1667	1	2	#NULL!	#NULL!	#NULL!	1
355	6	2	1	#NULL!	#NULL!	24	2	10.5	2	TP	2	1	#NULL!	#NULL!	#NULL!	#NULL!	#NULL!	#NULL!	#NULL!		#NULL!	0	0	1	1	0	4	2	0	1	3	2	1	0	1	16.1333	1	2	#NULL!	#NULL!	#NULL!	1
356	8	1	1	#NULL!	#NULL!	21	1	4	1	TF	2	#NULL!	#NULL!	#NULL!	#NULL!	#NULL!	#NULL!	#NULL!	#NULL!		#NULL!	0	0	1	1	0	4	2	1	2	4	2	1	0	1	67.3667	1	2	#NULL!	#NULL!	#NULL!	0
357	6	2	1	#NULL!	#NULL!	24	2	4	1	PF	2	#NULL!	#NULL!	#NULL!	#NULL!	#NULL!	#NULL!	#NULL!	#NULL!		#NULL!	0	0	2	1	1	4	2	1	2	3	2	1	0	1	80.2333	1	3	#NULL!	#NULL!	#NULL!	0
358	2	2	1	#NULL!	#NULL!	24	2	10	2	TF	2	1	#NULL!	#NULL!	#NULL!	#NULL!	#NULL!	#NULL!	#NULL!		#NULL!	0	0	2	1	0	4	2	1	2	3	2	1	0	1	93.8	1	3	#NULL!	#NULL!	#NULL!	1
359	5	2	1	#NULL!	#NULL!	18	1	3	1	PF	2	1	#NULL!	#NULL!	#NULL!	#NULL!	#NULL!	#NULL!	#NULL!		#NULL!	1	#NULL!	1	1	1	4	2	2	2	3	2	1	0	1	17.6667	1	2	#NULL!	#NULL!	#NULL!	0
360	8	2	2	#NULL!	#NULL!	26	2	4.5	1	PF	2	1	#NULL!	#NULL!	#NULL!	#NULL!	#NULL!	#NULL!	#NULL!		#NULL!	1	#NULL!	1	1	1	4	2	2	2	3	2	1	0	1	26.4667	1	2	#NULL!	#NULL!	#NULL!	0
361	8	2	1	#NULL!	#NULL!	26	2	5.5	2	TP	2	1	#NULL!	#NULL!	#NULL!	#NULL!	#NULL!	#NULL!	#NULL!		#NULL!	0	#NULL!	1	1	0	4	2	3	2	3	2	1	0	1	19	1	3	#NULL!	#NULL!	#NULL!	1
362	2	2	1	#NULL!	#NULL!	12	1	14	2	PF	2	#NULL!	#NULL!	#NULL!	#NULL!	#NULL!	#NULL!	#NULL!	#NULL!		#NULL!	1	#NULL!	1	1	1	2	1	0	1	1	1	1	0	1	84.3333	1	2	#NULL!	#NULL!	#NULL!	1
363	5	2	1	#NULL!	#NULL!	#NULL!	#NULL!	2.5	1	TP	2	1	#NULL!	#NULL!	#NULL!	#NULL!	#NULL!	#NULL!	#NULL!		#NULL!	0	#NULL!	1	1	1	2	1	1	2	2	1	1	0	1	56.6667	1	3	#NULL!	#NULL!	#NULL!	0
364	8	2	2	#NULL!	#NULL!	26	2	7	2	TF	2	1	#NULL!	#NULL!	#NULL!	#NULL!	#NULL!	#NULL!	#NULL!		#NULL!	1	#NULL!	1	1	0	2	1	2	2	3	2	1	0	1	92.5333	1	2	#NULL!	#NULL!	#NULL!	1
365	6	2	2	#NULL!	#NULL!	26	2	6	2	PF	2	#NULL!	#NULL!	#NULL!	#NULL!	#NULL!	#NULL!	#NULL!	#NULL!		#NULL!	0	0	1	1	0	2	1	2	2	3	2	1	0	1	110.167	1	3	#NULL!	#NULL!	#NULL!	1
366	8	2	2	#NULL!	#NULL!	26	2	5	2	PF	2	#NULL!	#NULL!	#NULL!	#NULL!	#NULL!	#NULL!	#NULL!	#NULL!		#NULL!	0	0	1	1	0	2	1	2	2	3	2	1	0	1	24.2	1	3	#NULL!	#NULL!	#NULL!	1
367	5	2	1	#NULL!	#NULL!	26	2	8.5	2	TP	2	#NULL!	#NULL!	#NULL!	#NULL!	#NULL!	#NULL!	#NULL!	#NULL!		#NULL!	0	0	2	1	1	2	1	2	2	3	2	1	0	1	2.9	1	3	#NULL!	#NULL!	#NULL!	1
368	5	2	2	#NULL!	#NULL!	26	2	10	2	TP	2	#NULL!	#NULL!	#NULL!	#NULL!	#NULL!	#NULL!	#NULL!	#NULL!		#NULL!	0	#NULL!	1	1	0	2	1	3	2	3	2	1	0	1	48.3667	1	3	#NULL!	#NULL!	#NULL!	1
369	8	2	1	#NULL!	#NULL!	35	2	9	2	TF	2	1	#NULL!	#NULL!	#NULL!	#NULL!	#NULL!	#NULL!	#NULL!		#NULL!	1	#NULL!	2	1	0	3	2	0	1	2	1	1	0	1	70.7667	1	2	#NULL!	#NULL!	#NULL!	1
370	3	2	2	#NULL!	#NULL!	18	1	4	1	tp	2	1	#NULL!	#NULL!	#NULL!	#NULL!	#NULL!	#NULL!	#NULL!		#NULL!	1	#NULL!	2	1	0	3	2	1	2	3	2	1	0	1	8.83333	1	3	#NULL!	#NULL!	#NULL!	0
371	1	2	2	#NULL!	#NULL!	38	2	7.5	2	0	#NULL!	1	#NULL!	#NULL!	#NULL!	#NULL!	#NULL!	#NULL!	#NULL!		#NULL!	0	0	2	1	1	3	2	2	2	3	2	0	0	1	110.067	1	2	#NULL!	#NULL!	#NULL!	1
372	5	2	2	#NULL!	#NULL!	25	2	5.5	2	PF	2	#NULL!	#NULL!	#NULL!	#NULL!	#NULL!	#NULL!	#NULL!	#NULL!		#NULL!	1	#NULL!	1	1	0	3	2	2	2	3	2	1	0	1	51.4	1	3	#NULL!	#NULL!	#NULL!	1
373	5	2	2	#NULL!	#NULL!	21	1	5.5	2	TP	2	1	#NULL!	#NULL!	#NULL!	#NULL!	#NULL!	#NULL!	#NULL!		#NULL!	0	#NULL!	1	1	0	3	2	2	2	3	2	1	0	1	5.5	1	3	#NULL!	#NULL!	#NULL!	1
374	8	2	2	#NULL!	#NULL!	12	1	3	1	TP-PF	2	#NULL!	#NULL!	#NULL!	#NULL!	#NULL!	#NULL!	#NULL!	#NULL!		#NULL!	0	#NULL!	1	1	1	4	2	2	2	3	2	1	0	1	26.8667	1	2	#NULL!	#NULL!	#NULL!	0
375	7	2	2	#NULL!	#NULL!	19	1	6	2	PF	2	#NULL!	#NULL!	#NULL!	#NULL!	#NULL!	#NULL!	#NULL!	#NULL!		#NULL!	1	#NULL!	2	1	0	4	2	3	2	3	2	1	0	1	39.3	1	3	#NULL!	#NULL!	#NULL!	1
376	8	2	2	#NULL!	#NULL!	22	1	4	1	S1	1	#NULL!	#NULL!	#NULL!	#NULL!	#NULL!	#NULL!	#NULL!	#NULL!		#NULL!	1	#NULL!	2	1	0	4	2	3	2	3	2	1	0	1	68.4667	1	3	#NULL!	#NULL!	#NULL!	0
377	8	2	2	#NULL!	#NULL!	69	2	9	2	S1	1	#NULL!	#NULL!	#NULL!	#NULL!	#NULL!	#NULL!	#NULL!	#NULL!		#NULL!	0	#NULL!	2	1	0	2	1	1	2	4	2	1	0	1	4.66667	1	2	#NULL!	#NULL!	#NULL!	1
378	4	2	2	#NULL!	#NULL!	73	2	6.5	2	TC	2	2	#NULL!	#NULL!	#NULL!	#NULL!	#NULL!	#NULL!	#NULL!		#NULL!	0	#NULL!	1	1	0	4	2	0	1	4	2	1	0	1	45	1	2	#NULL!	#NULL!	#NULL!	1
379	2	2	1	#NULL!	#NULL!	21	1	5.5	2	PF	2	#NULL!	#NULL!	#NULL!	#NULL!	#NULL!	#NULL!	#NULL!	#NULL!		#NULL!	0	0	1	1	1	4	2	2	2	3	2	1	0	1	9.36667	1	3	#NULL!	#NULL!	#NULL!	1
380	1	2	1	#NULL!	#NULL!	#NULL!	#NULL!	2.5	1	0	#NULL!	1	#NULL!	#NULL!	#NULL!	#NULL!	#NULL!	#NULL!	#NULL!		#NULL!	0	0	1	2	1	1	1	1	2	2	1	0	0	1	24.4667	1	3	#NULL!	#NULL!	#NULL!	0
381	1	2	1	#NULL!	#NULL!	14	1	3	1	TF	2	1	#NULL!	#NULL!	#NULL!	#NULL!	#NULL!	#NULL!	#NULL!		#NULL!	1	#NULL!	1	2	0	2	1	0	1	1	1	1	0	1	99.9	1	2	#NULL!	#NULL!	#NULL!	0
382	2	2	1	#NULL!	#NULL!	#NULL!	#NULL!	7.5	2	TF	2	#NULL!	#NULL!	#NULL!	#NULL!	#NULL!	#NULL!	#NULL!	#NULL!		#NULL!	0	#NULL!	1	2	0	2	1	1	2	2	1	1	0	1	92.5	1	2	#NULL!	#NULL!	#NULL!	1
383	1	2	1	#NULL!	#NULL!	#NULL!	#NULL!	3.5	1	PF	2	#NULL!	#NULL!	#NULL!	#NULL!	#NULL!	#NULL!	#NULL!	#NULL!		#NULL!	1	#NULL!	1	2	0	2	1	1	2	2	1	1	0	1	84.1	1	3	#NULL!	#NULL!	#NULL!	0
384	8	2	1	#NULL!	#NULL!	#NULL!	#NULL!	4	1	TP多西DP	2	1	#NULL!	#NULL!	#NULL!	#NULL!	#NULL!	#NULL!	#NULL!		#NULL!	0	0	1	2	0	2	1	1	2	2	1	1	0	1	17.2667	1	3	#NULL!	#NULL!	#NULL!	0
385	5	2	2	#NULL!	#NULL!	22	1	7.5	2	TC	2	#NULL!	#NULL!	#NULL!	#NULL!	#NULL!	#NULL!	#NULL!	#NULL!		#NULL!	0	#NULL!	1	2	0	4	2	1	2	3	2	1	0	1	53.7	1	2	#NULL!	#NULL!	#NULL!	1
386	8	1	1	#NULL!	#NULL!	#NULL!	#NULL!	8	2	TF	2	2	#NULL!	#NULL!	#NULL!	#NULL!	#NULL!	#NULL!	#NULL!		#NULL!	1	#NULL!	1	2	0	2	1	0	1	2	1	1	0	1	10.1	1	2	#NULL!	#NULL!	#NULL!	1
387	5	2	2	#NULL!	#NULL!	38	2	7	2	PF	2	1	#NULL!	#NULL!	#NULL!	#NULL!	#NULL!	#NULL!	#NULL!		#NULL!	1	#NULL!	1	2	1	2	1	2	2	3	2	1	0	1	46.1667	1	2	#NULL!	#NULL!	#NULL!	1
388	3	2	1	#NULL!	#NULL!	26	2	5.5	2	0	#NULL!	1	#NULL!	#NULL!	#NULL!	#NULL!	#NULL!	#NULL!	#NULL!		#NULL!	0	0	2	2	1	2	1	2	2	3	2	0	0	1	42.8333	1	3	#NULL!	#NULL!	#NULL!	1
389	6	2	1	#NULL!	#NULL!	24	2	2.5	1	PF	2	#NULL!	#NULL!	#NULL!	#NULL!	#NULL!	#NULL!	#NULL!	#NULL!		#NULL!	0	0	1	2	1	4	2	1	2	3	2	1	0	1	97.5333	1	2	#NULL!	#NULL!	#NULL!	0
390	8	2	2	#NULL!	#NULL!	24	2	10.5	2	TF	2	2	#NULL!	#NULL!	#NULL!	#NULL!	#NULL!	#NULL!	#NULL!		#NULL!	1	#NULL!	1	2	1	4	2	0	1	3	2	1	0	1	71.0667	1	2	#NULL!	#NULL!	#NULL!	1
391	6	2	2	#NULL!	#NULL!	25	2	4.5	1	S1	1	#NULL!	#NULL!	#NULL!	#NULL!	#NULL!	#NULL!	#NULL!	#NULL!		#NULL!	1	#NULL!	2	2	1	4	2	0	1	3	2	1	0	1	22.8667	1	3	#NULL!	#NULL!	#NULL!	0
392	2	2	2	#NULL!	#NULL!	21	1	3	1	TP多西DP	2	1	#NULL!	#NULL!	#NULL!	#NULL!	#NULL!	#NULL!	#NULL!		#NULL!	1	#NULL!	1	2	0	4	2	0	1	3	2	1	0	1	20	1	3	#NULL!	#NULL!	#NULL!	0
393	7	2	1	#NULL!	#NULL!	28	2	10	2	PF	2	#NULL!	#NULL!	#NULL!	#NULL!	#NULL!	#NULL!	#NULL!	#NULL!		#NULL!	0	#NULL!	1	2	0	4	2	2	2	3	2	1	0	1	67.8333	1	2	#NULL!	#NULL!	#NULL!	1
394	4	2	2	#NULL!	#NULL!	#NULL!	#NULL!	5.5	2	0	#NULL!	#NULL!	#NULL!	#NULL!	#NULL!	#NULL!	#NULL!	#NULL!	#NULL!		#NULL!	0	0	1	2	1	2	1	1	2	2	1	0	0	1	39.6667	1	3	#NULL!	#NULL!	#NULL!	1
395	8	2	2	#NULL!	#NULL!	24	2	4.5	1	TP	2	1	#NULL!	#NULL!	#NULL!	#NULL!	#NULL!	#NULL!	#NULL!		#NULL!	1	#NULL!	1	2	0	3	2	1	2	3	2	0	0	1	2.8	1	2	#NULL!	#NULL!	#NULL!	0
396	4	2	2	#NULL!	#NULL!	25	2	7	2	0	#NULL!	#NULL!	#NULL!	#NULL!	#NULL!	#NULL!	#NULL!	#NULL!	#NULL!		#NULL!	0	#NULL!	1	2	0	3	2	2	2	3	2	0	0	1	1.53333	1	2	#NULL!	#NULL!	#NULL!	1
397	4	2	2	#NULL!	#NULL!	#NULL!	#NULL!	7	2	0	#NULL!	1	#NULL!	#NULL!	#NULL!	#NULL!	#NULL!	#NULL!	#NULL!		#NULL!	1	#NULL!	1	2	1	4	2	1	2	4	2	0	0	1	13.8333	1	2	#NULL!	#NULL!	#NULL!	1
398	5	2	2	#NULL!	#NULL!	33	2	4.9	2	0	#NULL!	1	#NULL!	#NULL!	#NULL!	#NULL!	#NULL!	#NULL!	#NULL!		#NULL!	1	#NULL!	1	2	0	4	2	2	2	4	2	0	0	1	1.3	1	2	#NULL!	#NULL!	#NULL!	1
399	1	2	2	#NULL!	#NULL!	21	1	5	2	0	#NULL!	1	#NULL!	#NULL!	#NULL!	#NULL!	#NULL!	#NULL!	#NULL!		#NULL!	0	#NULL!	1	2	1	4	2	2	2	3	2	0	0	1	12.0667	1	3	#NULL!	#NULL!	#NULL!	1
400	8	2	2	#NULL!	#NULL!	11	1	2	1	PF	2	#NULL!	#NULL!	#NULL!	#NULL!	#NULL!	#NULL!	#NULL!	#NULL!		#NULL!	0	0	1	2	0	2	1	1	2	2	1	1	0	1	117.967	1	2	#NULL!	#NULL!	#NULL!	0
401	3	2	2	#NULL!	#NULL!	27	2	8.5	2	tp	2	1	#NULL!	#NULL!	#NULL!	#NULL!	#NULL!	#NULL!	#NULL!		#NULL!	0	0	1	2	0	2	1	1	2	2	1	1	0	1	82.3333	1	3	#NULL!	#NULL!	#NULL!	1
402	4	2	2	#NULL!	#NULL!	28	2	7	2	TF	2	#NULL!	#NULL!	#NULL!	#NULL!	#NULL!	#NULL!	#NULL!	#NULL!		#NULL!	0	#NULL!	1	2	1	4	2	1	2	3	2	1	0	1	9.6	1	2	#NULL!	#NULL!	#NULL!	1
403	6	2	2	#NULL!	#NULL!	16	1	4.5	1	TF	2	2	#NULL!	#NULL!	#NULL!	#NULL!	#NULL!	#NULL!	#NULL!		#NULL!	0	0	1	2	1	4	2	1	2	3	2	1	0	1	13.4	1	2	#NULL!	#NULL!	#NULL!	0
404	8	2	2	#NULL!	#NULL!	81	2	9	2	PF	2	#NULL!	#NULL!	#NULL!	#NULL!	#NULL!	#NULL!	#NULL!	#NULL!		#NULL!	0	0	1	2	0	2	1	0	1	4	2	1	0	1	55.9667	1	2	#NULL!	#NULL!	#NULL!	1
405	4	2	2	#NULL!	#NULL!	17	1	5	2	TF	2	#NULL!	#NULL!	#NULL!	#NULL!	#NULL!	#NULL!	#NULL!	#NULL!		#NULL!	0	#NULL!	2	2	0	2	1	1	2	4	2	1	0	1	67.4333	1	2	#NULL!	#NULL!	#NULL!	1
406	3	2	2	#NULL!	#NULL!	#NULL!	#NULL!	4	1	TP	2	1	#NULL!	#NULL!	#NULL!	#NULL!	#NULL!	#NULL!	#NULL!		#NULL!	1	#NULL!	1	2	1	4	2	1	2	4	2	1	0	1	23.1333	1	3	#NULL!	#NULL!	#NULL!	0
407	1	2	2	#NULL!	#NULL!	15	1	2.5	1	0	#NULL!	#NULL!	#NULL!	#NULL!	#NULL!	#NULL!	#NULL!	#NULL!	#NULL!		#NULL!	0	#NULL!	2	2	0	4	2	1	2	4	2	0	0	1	96.6333	1	3	#NULL!	#NULL!	#NULL!	0
408	6	2	1	#NULL!	#NULL!	19	1	2	1	tp	2	1	#NULL!	#NULL!	#NULL!	#NULL!	#NULL!	#NULL!	#NULL!		#NULL!	0	#NULL!	1	2	1	1	1	2	2	3	2	1	0	1	39.1667	1	3	#NULL!	#NULL!	#NULL!	0
409	1	2	2	#NULL!	#NULL!	29	2	9	2	TP	2	1	#NULL!	#NULL!	#NULL!	#NULL!	#NULL!	#NULL!	#NULL!		#NULL!	0	0	1	2	1	4	2	0	1	3	2	1	0	1	74.8333	1	3	#NULL!	#NULL!	#NULL!	1
410	6	2	2	#NULL!	#NULL!	20	1	6	2	0	#NULL!	#NULL!	#NULL!	#NULL!	#NULL!	#NULL!	#NULL!	#NULL!	#NULL!		#NULL!	0	0	1	2	0	4	2	0	1	3	2	0	0	1	42.1667	1	3	#NULL!	#NULL!	#NULL!	1
411	3	2	2	#NULL!	#NULL!	18	1	4	1	0	#NULL!	1	#NULL!	#NULL!	#NULL!	#NULL!	#NULL!	#NULL!	#NULL!		#NULL!	0	0	2	2	1	4	2	2	2	3	2	0	0	1	3.33333	1	3	#NULL!	#NULL!	#NULL!	0
412	1	2	2	#NULL!	#NULL!	15	1	3	1	PF	2	#NULL!	#NULL!	#NULL!	#NULL!	#NULL!	#NULL!	#NULL!	#NULL!		#NULL!	0	0	1	2	0	3	2	1	2	3	2	1	0	1	90.6333	1	2	#NULL!	#NULL!	#NULL!	0
413	5	2	2	#NULL!	#NULL!	18.49	1	3	1	S1	1	#NULL!	#NULL!	#NULL!	#NULL!	#NULL!	#NULL!	#NULL!	#NULL!		#NULL!	0	#NULL!	2	2	0	4	2	2	2	3	2	1	0	1	69.1333	1	3	#NULL!	#NULL!	#NULL!	0
414	1	2	2	#NULL!	#NULL!	19	1	8	2	tp	2	1	#NULL!	#NULL!	#NULL!	#NULL!	#NULL!	#NULL!	#NULL!		#NULL!	0	0	2	2	0	3	2	2	2	3	2	1	0	1	93.3333	1	2	#NULL!	#NULL!	#NULL!	1
415	7	1	2	#NULL!	#NULL!	38	2	10	2	0	#NULL!	1	#NULL!	#NULL!	#NULL!	#NULL!	#NULL!	#NULL!	#NULL!		#NULL!	0	#NULL!	1	2	0	4	2	0	1	3	2	0	0	1	10.9	1	2	#NULL!	#NULL!	#NULL!	1
416	5	2	2	#NULL!	#NULL!	69	2	10	2	泰新生	#NULL!	#NULL!	#NULL!	#NULL!	#NULL!	#NULL!	#NULL!	#NULL!	#NULL!		#NULL!	0	0	2	2	1	4	2	2	2	4	2	0	0	1	14.8	1	2	#NULL!	#NULL!	#NULL!	1
417	8	2	2	#NULL!	#NULL!	25	2	4	1	TF/PF	2	1	#NULL!	#NULL!	#NULL!	#NULL!	#NULL!	#NULL!	#NULL!		#NULL!	0	0	1	2	0	2	1	2	2	3	2	1	0	1	15.1	1	2	#NULL!	#NULL!	#NULL!	0
418	1	2	1	#NULL!	#NULL!	#NULL!	#NULL!	4	1	0	#NULL!	#NULL!	#NULL!	#NULL!	#NULL!	#NULL!	#NULL!	#NULL!	#NULL!		#NULL!	1	#NULL!	1	2	0	4	2	2	2	4	2	0	0	1	21.7333	1	3	#NULL!	#NULL!	#NULL!	0
419	8	2	2	#NULL!	#NULL!	23	1	8.5	2	S1	1	#NULL!	#NULL!	#NULL!	#NULL!	#NULL!	#NULL!	#NULL!	#NULL!		#NULL!	0	#NULL!	2	2	1	2	1	1	2	2	1	1	0	1	67.4	1	3	#NULL!	#NULL!	#NULL!	1
420	4	2	2	#NULL!	#NULL!	21	1	7	2	PF	2	#NULL!	#NULL!	#NULL!	#NULL!	#NULL!	#NULL!	#NULL!	#NULL!		#NULL!	0	0	1	2	1	2	1	2	2	3	2	1	0	1	38.6667	1	2	#NULL!	#NULL!	#NULL!	1
421	5	2	2	#NULL!	#NULL!	#NULL!	#NULL!	#NULL!	#NULL!	多西洛铂	1	2	#NULL!	#NULL!	#NULL!	#NULL!	#NULL!	#NULL!	#NULL!		#NULL!	#NULL!	#NULL!	1	1	0	1	1	1	2	4	2	1	0	1	56	1	2	1	#NULL!	#NULL!	#NULL!
422	1	2	2	#NULL!	#NULL!	#NULL!	#NULL!	#NULL!	#NULL!	同步TP增敏化疗4周，放疗后3周期紫杉醇+洛铂辅助化疗3周期	2	2	#NULL!	#NULL!	#NULL!	#NULL!	#NULL!	#NULL!	#NULL!		#NULL!	#NULL!	#NULL!	1	2	0	3	2	0	1	3	2	1	0	1	11	1	2	1	1	#NULL!	#NULL!
423	3	2	1	#NULL!	#NULL!	#NULL!	#NULL!	#NULL!	#NULL!		#NULL!	#NULL!	#NULL!	#NULL!	#NULL!	#NULL!	#NULL!	#NULL!	#NULL!		#NULL!	#NULL!	#NULL!	1	2	1	4	2	0	1	3	2	0	0	1	10	1	2	0	0	#NULL!	#NULL!
424	1	2	2	#NULL!	#NULL!	#NULL!	#NULL!	#NULL!	#NULL!	5周期洛铂 50mg d1+氟尿嘧啶 750mg d2-6+左亚叶酸钙 100mg d2-6新辅助化疗	2	2	#NULL!	#NULL!	#NULL!	#NULL!	#NULL!	#NULL!	#NULL!		#NULL!	#NULL!	#NULL!	1	1	0	2	2	1	2	3	2	1	0	1	10	1	2	0	0	#NULL!	#NULL!
425	3	1	2	#NULL!	#NULL!	#NULL!	#NULL!	#NULL!	#NULL!	放疗同步多西他赛+奈达铂，放疗后多西他赛+奈达铂辅助化疗4周期	2	2	#NULL!	#NULL!	#NULL!	#NULL!	#NULL!	#NULL!	#NULL!		#NULL!	#NULL!	#NULL!	1	1	1	1	1	0	1	3	2	1	0	1	37	0	2	0	0	#NULL!	#NULL!
426	5	1	1	#NULL!	#NULL!	#NULL!	#NULL!	#NULL!	#NULL!	放疗同步多西他赛+顺铂化疗4周期，	2	1	#NULL!	#NULL!	#NULL!	#NULL!	#NULL!	#NULL!	#NULL!		#NULL!	#NULL!	#NULL!	1	1	1	1	1	1	2	3	2	1	0	1	73	1	2	1	1	#NULL!	#NULL!
427	8	2	1	#NULL!	#NULL!	35	2	5	2	TP	2	1	#NULL!	#NULL!	#NULL!	#NULL!	#NULL!	#NULL!	#NULL!		#NULL!	#NULL!	#NULL!	1	1	1	2	2	0	1	3	2	1	0	1	2	1	2	1	1	#NULL!	1
428	8	2	2	#NULL!	#NULL!	#NULL!	#NULL!	#NULL!	#NULL!	放疗期间同步紫杉醇+卡铂化疗1周期后，出现IV度骨髓抑制伴发热，予暂停放疗，后调整第2周期同步化疗方案为紫杉醇脂质体+顺铂；紫杉醇+顺铂方案化疗2周期	2	2	#NULL!	#NULL!	#NULL!	#NULL!	#NULL!	1	#NULL!		#NULL!	#NULL!	0	1	1	1	3	2	0	1	2	1	1	0	1	56	0	2	1	1	#NULL!	#NULL!
429	1	2	1	#NULL!	#NULL!	#NULL!	#NULL!	#NULL!	#NULL!	放疗前dfp方案化疗，TP方案化疗，	2	1	#NULL!	#NULL!	#NULL!	#NULL!	#NULL!	#NULL!	#NULL!		#NULL!	#NULL!	0	1	1	0	1	1	1	2	3	2	1	0	1	57	0	2	1	1	#NULL!	#NULL!
430	6	2	1	#NULL!	#NULL!	#NULL!	#NULL!	#NULL!	#NULL!	放疗同步TP化疗	2	1	#NULL!	#NULL!	#NULL!	#NULL!	#NULL!	#NULL!	#NULL!		#NULL!	#NULL!	#NULL!	1	1	0	3	2	0	1	2	1	1	0	1	81	1	2	1	1	#NULL!	#NULL!
431	8	2	1	#NULL!	#NULL!	#NULL!	#NULL!	#NULL!	#NULL!	放疗同步3周期TP周方案化疗，放疗后辅助3周期TP方案化疗	2	2	#NULL!	#NULL!	#NULL!	#NULL!	#NULL!	#NULL!	#NULL!		#NULL!	#NULL!	#NULL!	1	1	1	4	2	0	1	3	2	1	0	1	10	1	2	0	0	#NULL!	#NULL!
432	8	2	1	#NULL!	#NULL!	#NULL!	#NULL!	#NULL!	#NULL!	TP	2	2	1	#NULL!	0	#NULL!	#NULL!	0	0	1	#NULL!	#NULL!	0	2	1	1	1	1	0	1	1	1	1	0	1	61	1	3	#NULL!	#NULL!	#NULL!	#NULL!
433	8	2	2	#NULL!	#NULL!	#NULL!	#NULL!	#NULL!	#NULL!	TP	2	1	2	#NULL!	1	#NULL!	#NULL!	1	0	1	#NULL!	#NULL!	#NULL!	2	2	1	2	1	0	1	1	1	1	0	1	39	1	3	#NULL!	#NULL!	#NULL!	#NULL!
434	6	2	2	#NULL!	#NULL!	#NULL!	#NULL!	#NULL!	#NULL!	TC	2	#NULL!	0	#NULL!	0	#NULL!	#NULL!	0	0	1	#NULL!	#NULL!	0	1	1	1	2	1	0	1	1	1	0	0	1	52.6	1	2	#NULL!	#NULL!	#NULL!	#NULL!
435	5	1	2	#NULL!	#NULL!	#NULL!	#NULL!	3	1	DP	2	#NULL!	2	#NULL!	1	#NULL!	#NULL!	1	1	1	#NULL!	#NULL!	#NULL!	2	1	0	2	1	0	1	1	1	0	0	1	102	1	2	#NULL!	#NULL!	#NULL!	0
436	3	1	2	#NULL!	#NULL!	#NULL!	#NULL!	#NULL!	#NULL!	TP	2	#NULL!	3	#NULL!	0	#NULL!	#NULL!	1	0	1	#NULL!	#NULL!	#NULL!	2	2	0	2	1	0	1	1	1	0	0	1	12	1	2	#NULL!	#NULL!	#NULL!	#NULL!
437	3	2	2	#NULL!	#NULL!	#NULL!	#NULL!	#NULL!	#NULL!	TP	2	#NULL!	1	#NULL!	0	#NULL!	#NULL!	1	0	1	#NULL!	#NULL!	#NULL!	2	2	0	2	1	0	1	1	1	0	0	1	12.5	1	3	#NULL!	#NULL!	#NULL!	#NULL!
438	8	2	2	#NULL!	#NULL!	#NULL!	#NULL!	#NULL!	#NULL!	TC	2	#NULL!	1	#NULL!	1	#NULL!	#NULL!	1	0	1	#NULL!	#NULL!	#NULL!	1	2	0	2	1	0	1	1	1	0	0	1	17	1	3	#NULL!	#NULL!	#NULL!	#NULL!
439	1	2	1	#NULL!	#NULL!	#NULL!	#NULL!	#NULL!	#NULL!	TP	2	1	2	#NULL!	0	#NULL!	#NULL!	1	0	1	#NULL!	#NULL!	#NULL!	2	2	0	4	2	0	1	3	2	1	0	1	12	1	2	#NULL!	#NULL!	#NULL!	#NULL!
440	1	2	1	#NULL!	#NULL!	#NULL!	#NULL!	#NULL!	#NULL!	替吉奥	1	#NULL!	1	#NULL!	0	#NULL!	#NULL!	1	0	1	#NULL!	#NULL!	#NULL!	2	2	0	4	2	0	1	3	2	0	0	1	12.5	1	3	#NULL!	#NULL!	#NULL!	#NULL!
441	5	2	2	#NULL!	#NULL!	#NULL!	#NULL!	#NULL!	#NULL!	TP	2	#NULL!	1	#NULL!	0	#NULL!	#NULL!	1	0	1	#NULL!	#NULL!	#NULL!	1	2	0	2	1	0	1	1	1	0	0	1	18	1	3	#NULL!	#NULL!	#NULL!	#NULL!
442	8	2	2	#NULL!	#NULL!	17	1	3	1	TP	2	#NULL!	1	#NULL!	0	#NULL!	#NULL!	0	0	1	#NULL!	#NULL!	0	2	1	1	2	1	0	1	1	1	0	0	1	67	0	2	#NULL!	#NULL!	#NULL!	0
443	8	2	2	#NULL!	#NULL!	#NULL!	#NULL!	#NULL!	#NULL!	TP	2	2	2	#NULL!	0	#NULL!	#NULL!	1	1	1	#NULL!	#NULL!	#NULL!	1	1	1	2	1	0	1	1	1	1	0	1	44	1	3	#NULL!	#NULL!	#NULL!	#NULL!
444	8	2	1	#NULL!	#NULL!	#NULL!	#NULL!	#NULL!	#NULL!	TC	2	2	1	#NULL!	0	#NULL!	#NULL!	1	1	1	#NULL!	#NULL!	#NULL!	1	1	1	2	1	0	1	1	1	1	0	1	55	1	3	#NULL!	#NULL!	#NULL!	#NULL!
445	8	2	2	#NULL!	#NULL!	#NULL!	#NULL!	#NULL!	#NULL!	TC	2	#NULL!	0	#NULL!	1	#NULL!	#NULL!	1	0	1	#NULL!	#NULL!	#NULL!	2	2	1	2	1	0	1	1	1	0	0	1	16.5	1	2	#NULL!	#NULL!	#NULL!	#NULL!
446	5	1	2	#NULL!	#NULL!	#NULL!	#NULL!	#NULL!	#NULL!	TP	2	#NULL!	3	#NULL!	2	#NULL!	#NULL!	1	0	1	#NULL!	#NULL!	#NULL!	1	2	0	4	2	0	1	3	2	0	0	1	20	1	3	#NULL!	#NULL!	#NULL!	#NULL!
447	5	2	2	#NULL!	#NULL!	#NULL!	#NULL!	#NULL!	#NULL!	TP	2	#NULL!	2	#NULL!	0	#NULL!	#NULL!	1	0	1	#NULL!	#NULL!	#NULL!	2	2	1	4	2	1	2	3	2	0	0	1	14	1	3	#NULL!	#NULL!	#NULL!	#NULL!
448	8	1	2	#NULL!	#NULL!	#NULL!	#NULL!	#NULL!	#NULL!	TC	2	#NULL!	1	#NULL!	1	#NULL!	#NULL!	0	0	1	#NULL!	#NULL!	0	2	2	1	2	1	1	2	2	1	0	0	1	59	1	2	#NULL!	#NULL!	#NULL!	#NULL!
449	5	2	2	#NULL!	#NULL!	#NULL!	#NULL!	#NULL!	#NULL!	TP	2	#NULL!	0	#NULL!	5	#NULL!	#NULL!	1	0	1	#NULL!	#NULL!	0	2	2	0	2	1	0	1	1	1	0	0	1	14	1	2	#NULL!	#NULL!	#NULL!	#NULL!
450	8	2	2	#NULL!	#NULL!	#NULL!	#NULL!	#NULL!	#NULL!	TP	2	2	2	#NULL!	1	#NULL!	#NULL!	1	1	1	#NULL!	#NULL!	#NULL!	1	2	0	4	2	0	1	3	2	1	0	1	33.5	0	2	#NULL!	#NULL!	#NULL!	#NULL!
451	3	2	2	#NULL!	#NULL!	#NULL!	#NULL!	#NULL!	#NULL!	TP	2	#NULL!	1	#NULL!	0	#NULL!	#NULL!	0	1	1	#NULL!	#NULL!	#NULL!	1	2	0	2	1	1	2	2	1	0	0	1	30	1	3	#NULL!	#NULL!	#NULL!	#NULL!
452	8	1	1	#NULL!	#NULL!	#NULL!	#NULL!	#NULL!	#NULL!	TP	2	#NULL!	2	#NULL!	0	#NULL!	#NULL!	0	0	1	#NULL!	#NULL!	0	1	2	0	2	1	1	2	2	1	0	0	1	72	1	2	#NULL!	#NULL!	#NULL!	#NULL!
453	3	2	1	#NULL!	#NULL!	#NULL!	#NULL!	#NULL!	#NULL!	DP	2	2	2	#NULL!	2	#NULL!	#NULL!	1	1	1	#NULL!	#NULL!	#NULL!	1	2	0	2	1	1	2	2	1	1	0	1	61	1	3	#NULL!	#NULL!	#NULL!	#NULL!
454	6	2	2	#NULL!	#NULL!	#NULL!	#NULL!	#NULL!	#NULL!	替吉奥	1	#NULL!	0	#NULL!	0	#NULL!	#NULL!	0	0	1	#NULL!	#NULL!	0	1	1	1	2	1	0	1	1	1	0	0	1	101	1	2	#NULL!	#NULL!	#NULL!	#NULL!
455	8	2	2	#NULL!	#NULL!	#NULL!	#NULL!	#NULL!	#NULL!	TP	2	2	1	#NULL!	0	#NULL!	#NULL!	0	1	1	#NULL!	#NULL!	#NULL!	1	2	1	2	1	2	2	3	2	1	0	1	19	1	2	#NULL!	#NULL!	#NULL!	#NULL!
456	7	2	1	#NULL!	#NULL!	#NULL!	#NULL!	#NULL!	#NULL!	P	1	#NULL!	0	#NULL!	0	#NULL!	#NULL!	1	1	1	#NULL!	#NULL!	0	2	2	0	3	2	1	2	2	1	0	0	1	19	1	2	#NULL!	#NULL!	#NULL!	#NULL!
457	6	2	1	#NULL!	#NULL!	22	1	4	1	TC	2	#NULL!	2	#NULL!	1	#NULL!	#NULL!	0	0	1	#NULL!	#NULL!	0	2	2	0	4	2	1	2	3	2	0	0	1	87.2	1	3	#NULL!	#NULL!	#NULL!	0
458	4	2	2	#NULL!	#NULL!	#NULL!	#NULL!	#NULL!	#NULL!	TC	2	#NULL!	0	#NULL!	0	#NULL!	#NULL!	0	0	1	#NULL!	#NULL!	0	2	1	1	3	2	0	1	2	1	0	0	1	48.5	1	2	#NULL!	#NULL!	#NULL!	#NULL!
459	8	2	2	#NULL!	#NULL!	#NULL!	#NULL!	#NULL!	#NULL!	TP	2	#NULL!	3	#NULL!	0	#NULL!	#NULL!	0	0	2	#NULL!	#NULL!	0	1	2	1	4	2	1	2	3	2	0	0	1	3	0	2	#NULL!	#NULL!	#NULL!	#NULL!
460	5	2	2	#NULL!	#NULL!	#NULL!	#NULL!	#NULL!	#NULL!	TP	2	#NULL!	1	#NULL!	1	#NULL!	#NULL!	1	0	1	#NULL!	#NULL!	#NULL!	1	1	0	4	2	1	2	3	2	0	0	1	14	1	3	#NULL!	#NULL!	#NULL!	#NULL!
461	4	2	2	#NULL!	#NULL!	16	1	3	1	替吉奥	1	1	1	#NULL!	0	#NULL!	#NULL!	0	0	1	#NULL!	#NULL!	0	2	1	1	1	1	0	1	1	1	1	0	1	110	1	3	#NULL!	#NULL!	#NULL!	0
462	2	2	2	#NULL!	#NULL!	#NULL!	#NULL!	#NULL!	#NULL!	TC	2	#NULL!	1	#NULL!	0	#NULL!	#NULL!	0	1	1	#NULL!	#NULL!	#NULL!	1	2	0	1	1	0	1	1	1	0	0	1	18	1	3	#NULL!	#NULL!	#NULL!	#NULL!
463	5	1	2	#NULL!	#NULL!	#NULL!	#NULL!	#NULL!	#NULL!	DP	2	#NULL!	2	#NULL!	0	#NULL!	#NULL!	1	0	1	#NULL!	#NULL!	#NULL!	1	2	1	1	1	0	1	1	1	0	0	1	37.5	1	2	#NULL!	#NULL!	#NULL!	#NULL!
464	1	2	2	#NULL!	#NULL!	#NULL!	#NULL!	#NULL!	#NULL!	替吉奥	1	#NULL!	0	#NULL!	0	#NULL!	#NULL!	0	1	1	#NULL!	#NULL!	#NULL!	1	2	1	2	1	0	1	1	1	0	0	1	62.2	1	2	#NULL!	#NULL!	#NULL!	#NULL!
465	4	2	2	#NULL!	#NULL!	11	1	2	1	FLP	2	1	1	#NULL!	0	#NULL!	#NULL!	0	1	1	#NULL!	#NULL!	#NULL!	2	1	1	2	1	0	1	1	1	1	0	1	110	1	3	#NULL!	#NULL!	#NULL!	0
466	5	1	1	#NULL!	#NULL!	#NULL!	#NULL!	#NULL!	#NULL!	TP	2	#NULL!	0	#NULL!	0	#NULL!	#NULL!	0	0	1	#NULL!	#NULL!	0	2	1	1	1	1	0	1	1	1	0	0	1	42	1	2	#NULL!	#NULL!	#NULL!	#NULL!
467	5	2	2	#NULL!	#NULL!	#NULL!	#NULL!	#NULL!	#NULL!	TP	2	#NULL!	1	#NULL!	2	#NULL!	#NULL!	1	0	1	#NULL!	#NULL!	#NULL!	2	2	1	1	1	0	1	1	1	0	0	1	17	1	2	#NULL!	#NULL!	#NULL!	#NULL!
468	3	2	1	#NULL!	#NULL!	#NULL!	#NULL!	#NULL!	#NULL!	DP	2	#NULL!	2	#NULL!	1	#NULL!	#NULL!	1	0	1	#NULL!	#NULL!	#NULL!	2	2	0	2	1	0	1	1	1	0	0	1	27	1	2	#NULL!	#NULL!	#NULL!	#NULL!
469	8	2	1	#NULL!	#NULL!	#NULL!	#NULL!	#NULL!	#NULL!		#NULL!	1	3	1	0	#NULL!	#NULL!	#NULL!	#NULL!	2	6.77	1	#NULL!	2	2	0	2	1	0	1	1	1	1	0	1	53	0	2	#NULL!	#NULL!	#NULL!	#NULL!
470	1	2	2	#NULL!	#NULL!	#NULL!	#NULL!	#NULL!	#NULL!		#NULL!	#NULL!	3	1	0	#NULL!	#NULL!	2	#NULL!	2	29.08	0	#NULL!	1	1	0	3	2	1	1	2	1	0	0	1	29.08	1	3	#NULL!	#NULL!	#NULL!	#NULL!
471	1	2	1	#NULL!	#NULL!	#NULL!	#NULL!	#NULL!	#NULL!		#NULL!	1	2	1	0	#NULL!	#NULL!	#NULL!	1	2	19.38	0	#NULL!	2	2	1	2	1	0	1	1	1	1	0	1	42	0	3	#NULL!	#NULL!	#NULL!	#NULL!
472	3	2	2	#NULL!	#NULL!	#NULL!	#NULL!	#NULL!	#NULL!		#NULL!	2	1	1	1	1	#NULL!	#NULL!	#NULL!	1	42.41	0	0	2	1	1	2	1	0	1	1	1	1	0	1	42.41	1	2	#NULL!	#NULL!	#NULL!	#NULL!
473	1	2	2	#NULL!	#NULL!	#NULL!	#NULL!	#NULL!	#NULL!		#NULL!	#NULL!	2	1	0	#NULL!	#NULL!	#NULL!	#NULL!	2	2.37	1	#NULL!	1	2	0	3	2	1	1	2	1	1	0	1	52	0	2	#NULL!	#NULL!	#NULL!	#NULL!
474	3	1	1	#NULL!	#NULL!	#NULL!	#NULL!	#NULL!	#NULL!		#NULL!	#NULL!	0	#NULL!	0	#NULL!	#NULL!	#NULL!	#NULL!	2	23.5	1	#NULL!	2	1	1	3	2	1	1	2	1	1	0	1	32.3	0	2	#NULL!	#NULL!	#NULL!	#NULL!
475	3	2	1	#NULL!	#NULL!	#NULL!	#NULL!	#NULL!	#NULL!		#NULL!	#NULL!	1	1	0	#NULL!	#NULL!	#NULL!	#NULL!	1	18.5	1	#NULL!	2	1	0	4	2	2	1	3	2	1	0	1	18.5	0	3	#NULL!	#NULL!	#NULL!	#NULL!
476	7	2	2	#NULL!	#NULL!	#NULL!	#NULL!	#NULL!	#NULL!		#NULL!	2	2	1	2	1	#NULL!	#NULL!	#NULL!	2	58	1	#NULL!	1	1	0	2	1	1	1	2	1	1	0	1	61	0	3	#NULL!	#NULL!	#NULL!	#NULL!
477	3	2	2	#NULL!	#NULL!	#NULL!	#NULL!	#NULL!	#NULL!		#NULL!	2	2	1	2	1	#NULL!	#NULL!	1	2	61.44	0	#NULL!	1	1	0	2	1	1	1	2	1	1	0	1	61.44	0	3	#NULL!	#NULL!	#NULL!	#NULL!
478	8	2	2	#NULL!	#NULL!	#NULL!	#NULL!	#NULL!	#NULL!		#NULL!	1	2	1	1	1	#NULL!	#NULL!	#NULL!	2	28	1	#NULL!	2	2	0	2	1	0	1	1	1	1	0	1	39	0	3	#NULL!	#NULL!	#NULL!	#NULL!
479	3	1	2	#NULL!	#NULL!	#NULL!	#NULL!	#NULL!	#NULL!		#NULL!	#NULL!	1	1	1	1	#NULL!	#NULL!	#NULL!	2	59	0	0	2	2	1	2	1	1	1	2	1	1	0	1	59	0	2	#NULL!	#NULL!	#NULL!	#NULL!
480	1	1	2	#NULL!	#NULL!	#NULL!	#NULL!	#NULL!	#NULL!		#NULL!	#NULL!	1	1	0	#NULL!	#NULL!	#NULL!	#NULL!	2	11.96	0	0	1	2	1	2	1	1	1	2	1	1	0	1	11.96	0	2	#NULL!	#NULL!	#NULL!	#NULL!
481	8	1	1	#NULL!	#NULL!	29	2	4	1		#NULL!	1	3	1	0	#NULL!	#NULL!	#NULL!	#NULL!	1	5.85	1	#NULL!	1	1	1	2	1	1	1	2	1	1	0	1	11.6	0	3	#NULL!	#NULL!	#NULL!	0
482	8	2	1	#NULL!	#NULL!	#NULL!	#NULL!	#NULL!	#NULL!		#NULL!	#NULL!	1	1	1	1	#NULL!	#NULL!	#NULL!	2	10.7	1	#NULL!	1	2	0	2	1	0	1	1	1	1	0	1	17.3	0	3	#NULL!	#NULL!	#NULL!	#NULL!
483	3	2	2	#NULL!	#NULL!	#NULL!	#NULL!	#NULL!	#NULL!		#NULL!	#NULL!	2	1	0	#NULL!	#NULL!	#NULL!	#NULL!	1	91.07	0	0	1	1	1	2	1	2	1	3	2	0	0	1	91.07	1	2	#NULL!	#NULL!	#NULL!	#NULL!
484	8	2	2	#NULL!	#NULL!	#NULL!	#NULL!	#NULL!	#NULL!		#NULL!	2	3	1	2	1	#NULL!	#NULL!	#NULL!	1	20.04	0	0	2	1	0	2	1	1	1	2	1	1	0	1	20.04	1	2	#NULL!	#NULL!	#NULL!	#NULL!
485	1	2	2	#NULL!	#NULL!	#NULL!	#NULL!	#NULL!	#NULL!		#NULL!	2	2	1	0	#NULL!	#NULL!	#NULL!	#NULL!	1	34	1	#NULL!	1	1	1	2	1	0	1	1	1	1	0	1	44	0	3	#NULL!	#NULL!	#NULL!	#NULL!
486	1	2	2	#NULL!	#NULL!	#NULL!	#NULL!	#NULL!	#NULL!		#NULL!	#NULL!	2	1	0	#NULL!	#NULL!	#NULL!	#NULL!	2	12.1	1	#NULL!	2	2	0	4	2	1	1	3	2	0	0	1	52	0	3	#NULL!	#NULL!	#NULL!	#NULL!
487	3	2	2	#NULL!	#NULL!	#NULL!	#NULL!	#NULL!	#NULL!		#NULL!	#NULL!	1	1	0	#NULL!	#NULL!	#NULL!	1	2	30	0	#NULL!	1	2	0	2	1	1	1	2	1	1	0	1	30	0	3	#NULL!	#NULL!	#NULL!	#NULL!
488	6	2	1	#NULL!	#NULL!	#NULL!	#NULL!	#NULL!	#NULL!		#NULL!	#NULL!	2	1	2	1	#NULL!	#NULL!	#NULL!	2	16.16	0	0	1	1	0	2	1	1	1	2	1	0	0	1	16.16	1	2	#NULL!	#NULL!	#NULL!	#NULL!
489	1	2	2	#NULL!	#NULL!	#NULL!	#NULL!	#NULL!	#NULL!		#NULL!	2	1	1	0	#NULL!	#NULL!	#NULL!	#NULL!	2	38	1	#NULL!	1	1	0	2	1	0	1	1	1	1	0	1	55	0	3	#NULL!	#NULL!	#NULL!	#NULL!
490	7	2	2	#NULL!	#NULL!	#NULL!	#NULL!	#NULL!	#NULL!		#NULL!	#NULL!	3	1	2	1	#NULL!	#NULL!	#NULL!	2	18	1	#NULL!	1	2	1	4	2	0	1	3	2	1	0	1	20	0	3	#NULL!	#NULL!	#NULL!	#NULL!
491	5	2	2	#NULL!	#NULL!	#NULL!	#NULL!	#NULL!	#NULL!		#NULL!	2	1	1	0	#NULL!	#NULL!	#NULL!	#NULL!	2	80.33	0	0	2	1	1	1	1	0	1	1	1	1	0	1	80.33	1	3	#NULL!	#NULL!	#NULL!	#NULL!
492	5	2	1	#NULL!	#NULL!	#NULL!	#NULL!	#NULL!	#NULL!		#NULL!	1	2	1	0	#NULL!	#NULL!	#NULL!	3	2	22.93	0	#NULL!	1	1	1	4	2	0	1	3	2	1	0	1	22.93	0	2	#NULL!	#NULL!	#NULL!	#NULL!
493	7	2	2	#NULL!	#NULL!	#NULL!	#NULL!	#NULL!	#NULL!		#NULL!	#NULL!	2	1	1	1	#NULL!	#NULL!	#NULL!	2	40.02	0	0	2	2	1	2	1	0	1	1	1	1	0	1	40.02	1	2	#NULL!	#NULL!	#NULL!	#NULL!
494	8	2	1	#NULL!	#NULL!	#NULL!	#NULL!	#NULL!	#NULL!		#NULL!	#NULL!	0	#NULL!	0	#NULL!	#NULL!	#NULL!	#NULL!	1	52.6	0	0	1	1	0	2	1	0	1	1	1	1	0	1	52.6	0	2	#NULL!	#NULL!	#NULL!	#NULL!
495	8	2	2	#NULL!	#NULL!	58	2	3.7	1		#NULL!	2	1	1	0	#NULL!	#NULL!	#NULL!	#NULL!	1	10	0	#NULL!	1	1	0	2	1	2	1	3	2	1	0	1	10	0	2	#NULL!	#NULL!	#NULL!	0
496	6	2	2	#NULL!	#NULL!	#NULL!	#NULL!	#NULL!	#NULL!		#NULL!	1	2	1	0	#NULL!	#NULL!	4	3	2	19.42	1	#NULL!	2	2	0	1	1	1	1	2	1	1	0	1	27.47	1	3	#NULL!	#NULL!	#NULL!	#NULL!
497	1	2	2	#NULL!	#NULL!	#NULL!	#NULL!	#NULL!	#NULL!		#NULL!	1	0	#NULL!	0	#NULL!	#NULL!	#NULL!	#NULL!	1	5.29	1	#NULL!	1	1	1	1	1	1	1	2	1	1	0	1	6.74	0	3	#NULL!	#NULL!	#NULL!	#NULL!
498	1	2	2	#NULL!	#NULL!	#NULL!	#NULL!	#NULL!	#NULL!		#NULL!	1	2	1	0	#NULL!	#NULL!	#NULL!	#NULL!	2	43.76	0	0	2	1	1	2	1	0	1	1	1	1	0	1	43.76	1	2	#NULL!	#NULL!	#NULL!	#NULL!
499	3	1	1	#NULL!	#NULL!	#NULL!	#NULL!	#NULL!	#NULL!	TP	2	1	#NULL!	#NULL!	#NULL!	#NULL!	#NULL!	#NULL!	#NULL!		#NULL!	#NULL!	#NULL!	2	1	1	3	2	1	1	3	2	1	0	1	43	0	2	0	0	#NULL!	#NULL!
500	8	2	1	#NULL!	#NULL!	#NULL!	#NULL!	#NULL!	#NULL!	TP	#NULL!	2	#NULL!	#NULL!	#NULL!	#NULL!	#NULL!	#NULL!	#NULL!		#NULL!	#NULL!	0	1	1	0	1	1	1	1	1	1	1	0	1	46	0	2	1	0	#NULL!	#NULL!
501	8	2	2	#NULL!	#NULL!	#NULL!	#NULL!	#NULL!	#NULL!	TP	#NULL!	2	#NULL!	#NULL!	#NULL!	#NULL!	#NULL!	#NULL!	#NULL!		#NULL!	#NULL!	#NULL!	2	1	1	3	2	1	1	3	2	1	0	1	59	1	2	1	1	#NULL!	#NULL!
502	6	2	2	#NULL!	#NULL!	#NULL!	#NULL!	#NULL!	#NULL!	TC	#NULL!	1	#NULL!	#NULL!	#NULL!	#NULL!	#NULL!	#NULL!	#NULL!		#NULL!	#NULL!	#NULL!	1	1	0	4	2	1	1	4	2	1	0	1	25	1	2	0	1	#NULL!	#NULL!
503	8	2	2	#NULL!	#NULL!	#NULL!	#NULL!	#NULL!	#NULL!	TP	#NULL!	2	#NULL!	#NULL!	#NULL!	#NULL!	#NULL!	#NULL!	#NULL!		#NULL!	#NULL!	0	2	1	1	1	1	1	1	1	1	1	0	1	63	0	2	0	0	#NULL!	#NULL!
504	4	2	2	#NULL!	#NULL!	#NULL!	#NULL!	#NULL!	#NULL!	TP	#NULL!	2	#NULL!	#NULL!	#NULL!	#NULL!	#NULL!	#NULL!	#NULL!		#NULL!	#NULL!	#NULL!	2	1	1	3	2	2	1	3	2	1	0	1	27	1	2	0	0	#NULL!	#NULL!
505	8	2	1	#NULL!	#NULL!	#NULL!	#NULL!	#NULL!	#NULL!	TP	#NULL!	1	#NULL!	#NULL!	#NULL!	#NULL!	#NULL!	#NULL!	#NULL!		#NULL!	#NULL!	0	2	1	0	2	1	0	1	2	2	1	0	1	48	0	2	0	0	#NULL!	#NULL!
506	8	2	2	#NULL!	#NULL!	#NULL!	#NULL!	#NULL!	#NULL!	TC	#NULL!	2	#NULL!	#NULL!	#NULL!	#NULL!	#NULL!	#NULL!	#NULL!		#NULL!	#NULL!	0	2	2	0	1	1	1	1	1	1	1	0	1	54	0	2	0	0	#NULL!	#NULL!
507	6	1	2	#NULL!	#NULL!	#NULL!	#NULL!	#NULL!	#NULL!	TC	#NULL!	2	#NULL!	#NULL!	#NULL!	#NULL!	#NULL!	#NULL!	#NULL!		#NULL!	#NULL!	0	2	2	0	1	1	1	1	1	1	1	0	1	62	0	3	0	0	#NULL!	#NULL!
508	8	1	1	#NULL!	#NULL!	#NULL!	#NULL!	#NULL!	#NULL!	FLP	#NULL!	2	#NULL!	#NULL!	#NULL!	#NULL!	#NULL!	#NULL!	#NULL!		#NULL!	#NULL!	0	2	2	0	3	2	0	1	2	2	1	0	1	52	0	2	0	0	#NULL!	#NULL!
509	8	2	1	#NULL!	#NULL!	#NULL!	#NULL!	#NULL!	#NULL!	TP	#NULL!	1	#NULL!	#NULL!	#NULL!	#NULL!	#NULL!	#NULL!	#NULL!		#NULL!	#NULL!	0	1	1	0	2	1	0	1	2	2	1	0	1	53	0	2	1	1	#NULL!	#NULL!
510	1	2	2	#NULL!	#NULL!	#NULL!	#NULL!	#NULL!	#NULL!	TP	#NULL!	2	#NULL!	#NULL!	#NULL!	#NULL!	#NULL!	#NULL!	#NULL!		#NULL!	#NULL!	#NULL!	1	2	0	4	2	1	1	4	2	1	0	1	34	1	3	0	1	#NULL!	#NULL!
511	5	2	2	#NULL!	#NULL!	#NULL!	#NULL!	#NULL!	#NULL!	替吉奥	1	1	#NULL!	#NULL!	#NULL!	#NULL!	#NULL!	#NULL!	#NULL!		#NULL!	#NULL!	0	2	2	0	1	1	0	1	1	1	1	0	1	52	0	2	1	0	#NULL!	#NULL!
512	3	1	2	#NULL!	#NULL!	#NULL!	#NULL!	#NULL!	#NULL!	TP	#NULL!	2	#NULL!	#NULL!	#NULL!	#NULL!	#NULL!	#NULL!	#NULL!		#NULL!	#NULL!	#NULL!	1	1	0	3	2	1	1	3	2	1	0	1	30	1	2	1	1	#NULL!	#NULL!
513	2	2	1	#NULL!	#NULL!	#NULL!	#NULL!	#NULL!	#NULL!	FLP	#NULL!	1	#NULL!	#NULL!	#NULL!	#NULL!	#NULL!	#NULL!	#NULL!		#NULL!	#NULL!	#NULL!	1	2	0	3	2	0	1	2	2	1	0	1	32	1	3	0	0	#NULL!	#NULL!
514	4	2	2	#NULL!	#NULL!	#NULL!	#NULL!	#NULL!	#NULL!	TP	#NULL!	2	#NULL!	#NULL!	#NULL!	#NULL!	#NULL!	#NULL!	#NULL!		#NULL!	#NULL!	#NULL!	2	2	0	2	1	0	1	2	2	1	0	1	26	1	3	0	0	#NULL!	#NULL!
515	2	2	2	#NULL!	#NULL!	11	1	2	1	TC	#NULL!	2	#NULL!	#NULL!	#NULL!	#NULL!	#NULL!	#NULL!	#NULL!		#NULL!	#NULL!	0	2	2	1	1	1	1	1	1	1	1	0	1	59	0	2	0	0	#NULL!	0
516	7	1	2	#NULL!	#NULL!	#NULL!	#NULL!	#NULL!	#NULL!	FLP	#NULL!	2	#NULL!	#NULL!	#NULL!	#NULL!	#NULL!	#NULL!	#NULL!		#NULL!	#NULL!	#NULL!	1	1	0	3	2	2	1	3	2	1	0	1	10	1	3	0	0	#NULL!	#NULL!
517	3	2	2	#NULL!	#NULL!	#NULL!	#NULL!	#NULL!	#NULL!	替吉奥	1	1	#NULL!	#NULL!	#NULL!	#NULL!	#NULL!	#NULL!	#NULL!		#NULL!	#NULL!	0	2	1	0	1	1	2	1	3	2	1	0	1	56	0	2	0	0	#NULL!	#NULL!
518	8	2	1	#NULL!	#NULL!	16	1	5	2	FLP	#NULL!	2	#NULL!	#NULL!	#NULL!	#NULL!	#NULL!	#NULL!	#NULL!		#NULL!	#NULL!	0	2	1	0	1	1	0	1	1	1	1	0	1	59	0	2	0	0	#NULL!	1
519	6	2	1	#NULL!	#NULL!	#NULL!	#NULL!	#NULL!	#NULL!	TP	#NULL!	2	#NULL!	#NULL!	#NULL!	#NULL!	#NULL!	#NULL!	#NULL!		#NULL!	#NULL!	#NULL!	1	2	0	3	2	1	1	3	2	1	0	1	29	1	2	1	1	#NULL!	#NULL!
520	5	2	1	#NULL!	#NULL!	10	1	2	1	TC	#NULL!	2	#NULL!	#NULL!	#NULL!	#NULL!	#NULL!	#NULL!	#NULL!		#NULL!	#NULL!	0	2	2	0	1	1	0	1	1	1	1	0	1	56	0	2	0	0	#NULL!	0
521	1	1	2	#NULL!	#NULL!	#NULL!	#NULL!	#NULL!	#NULL!	TP	#NULL!	2	#NULL!	#NULL!	#NULL!	#NULL!	#NULL!	#NULL!	#NULL!		#NULL!	#NULL!	#NULL!	1	1	1	3	2	2	1	3	2	1	0	1	43	1	2	1	1	#NULL!	#NULL!
522	4	2	2	#NULL!	#NULL!	#NULL!	#NULL!	#NULL!	#NULL!	TP	#NULL!	2	#NULL!	#NULL!	#NULL!	#NULL!	#NULL!	#NULL!	#NULL!		#NULL!	#NULL!	0	1	1	0	3	2	1	1	3	2	1	0	1	59	0	2	1	1	#NULL!	#NULL!
523	1	1	2	#NULL!	#NULL!	#NULL!	#NULL!	#NULL!	#NULL!	TP	#NULL!	1	#NULL!	#NULL!	#NULL!	#NULL!	#NULL!	#NULL!	#NULL!		#NULL!	#NULL!	#NULL!	1	2	0	2	1	1	1	2	2	1	0	1	27	1	2	1	1	#NULL!	#NULL!
524	1	2	2	#NULL!	#NULL!	#NULL!	#NULL!	#NULL!	#NULL!	雷替曲塞+奈达铂 1周期 后期改用替吉奥	2	#NULL!	#NULL!	#NULL!	#NULL!	#NULL!	#NULL!	#NULL!	#NULL!		23	1	#NULL!	1	2	0	2	1	1	2	2	1	1	1	0	27	1	1	1	1	1	#NULL!
525	1	2	2	#NULL!	#NULL!	#NULL!	#NULL!	#NULL!	#NULL!		#NULL!	#NULL!	2	1	0	#NULL!	1	#NULL!	#NULL!	1	13	0	#NULL!	1	1	1	4	2	2	2	4	2	0	1	0	13	1	1	0	0	1	#NULL!
526	1	2	2	80.8169	0	80.8169	2	6	2		2	1	1	1	0	#NULL!	3	#NULL!	#NULL!	2	33	0	#NULL!	1	1	0	4	2	1	2	4	2	1	1	0	33	0	1	1	1	1	1
527	2	2	2	#NULL!	#NULL!	#NULL!	#NULL!	#NULL!	#NULL!	紫杉醇+顺铂	2	1	2	1	0	#NULL!	2	1	#NULL!		4	1	#NULL!	1	1	1	3	2	2	2	3	2	1	1	0	29	1	1	1	1	1	#NULL!
528	5	2	1	#NULL!	#NULL!	#NULL!	#NULL!	#NULL!	#NULL!		2	#NULL!	0	#NULL!	0	#NULL!	2	#NULL!	#NULL!	2	10	0	0	1	2	0	2	1	1	2	2	1	1	1	0	27	1	1	1	1	1	#NULL!
529	6	2	1	#NULL!	#NULL!	9	1	4	1	PF	#NULL!	1	0	#NULL!	0	#NULL!	4	#NULL!	#NULL!	2	30	0	#NULL!	1	1	1	3	2	0	1	1	1	1	1	0	30	1	1	1	1	1	0
530	1	2	1	#NULL!	#NULL!	#NULL!	#NULL!	#NULL!	#NULL!	替吉奥	1	#NULL!	1	2	0	#NULL!	1	#NULL!	#NULL!		51	0	#NULL!	1	1	1	4	2	2	2	4	2	1	1	0	51	0	1	1	0	1	#NULL!
531	1	2	2	#NULL!	#NULL!	#NULL!	#NULL!	#NULL!	#NULL!	替吉奥+顺铂	2	#NULL!	2	1	0	#NULL!	1	#NULL!	#NULL!	1	7	0	0	1	1	0	2	1	3	2	4	2	1	1	0	7	1	1	1	1	1	#NULL!
532	3	2	2	#NULL!	#NULL!	#NULL!	#NULL!	#NULL!	#NULL!		2	#NULL!	0	#NULL!	1	#NULL!	#NULL!	2	#NULL!	2	9	1	#NULL!	1	1	1	4	2	2	2	4	2	1	1	0	9	1	1	1	1	1	#NULL!
533	2	1	2	#NULL!	#NULL!	#NULL!	#NULL!	#NULL!	#NULL!	紫杉醇+卡铂	1	1	1	1	0	#NULL!	0	#NULL!	#NULL!	1	5	0	0	1	2	1	4	2	2	2	4	2	1	1	0	24	0	1	1	1	1	#NULL!
534	6	1	2	#NULL!	#NULL!	#NULL!	#NULL!	#NULL!	#NULL!		1	#NULL!	2	1	0	#NULL!	3	#NULL!	#NULL!	2	21	0	0	1	1	1	2	1	2	2	3	2	1	1	0	21	0	1	1	1	1	#NULL!
535	7	1	2	#NULL!	#NULL!	#NULL!	#NULL!	#NULL!	#NULL!	顺铂，希美纳	#NULL!	1	2	1	0	#NULL!	1	#NULL!	#NULL!	2	20	0	0	1	2	1	3	2	0	1	2	1	1	1	0	23	1	1	1	1	1	#NULL!
536	1	2	2	#NULL!	#NULL!	#NULL!	#NULL!	#NULL!	#NULL!	替吉奥	1	#NULL!	0	#NULL!	0	#NULL!	#NULL!	#NULL!	#NULL!	2	13	0	0	1	2	1	3	2	0	1	3	2	1	1	0	13	1	1	1	1	1	#NULL!
537	1	2	2	#NULL!	#NULL!	#NULL!	#NULL!	#NULL!	#NULL!		2	#NULL!	#NULL!	#NULL!	#NULL!	#NULL!	#NULL!	#NULL!	#NULL!	1	36	1	#NULL!	1	2	1	4	2	2	2	4	2	1	1	0	56	1	1	1	1	1	#NULL!
538	5	2	2	#NULL!	#NULL!	#NULL!	#NULL!	#NULL!	#NULL!	PF	#NULL!	1	1	1	0	#NULL!	0	#NULL!	#NULL!	1	35	0	#NULL!	2	2	1	3	2	2	2	3	2	1	1	0	63	1	1	0	1	1	#NULL!
539	8	1	1	#NULL!	#NULL!	#NULL!	#NULL!	#NULL!	#NULL!	PF	2	1	1	1	0	#NULL!	0	#NULL!	#NULL!	1	19	0	#NULL!	1	2	1	3	2	2	2	3	2	1	1	0	37	0	1	0	1	1	#NULL!
540	8	2	1	#NULL!	#NULL!	#NULL!	#NULL!	#NULL!	#NULL!	替吉奥	1	#NULL!	0	#NULL!	0	#NULL!	0	#NULL!	#NULL!	1	28	0	#NULL!	1	2	0	3	2	2	2	3	2	1	1	0	28	0	1	1	0	1	#NULL!
541	7	2	1	#NULL!	#NULL!	#NULL!	#NULL!	#NULL!	#NULL!	多西他赛+奈达铂	2	#NULL!	0	#NULL!	0	#NULL!	#NULL!	#NULL!	#NULL!	2	9	0	0	1	1	1	2	1	0	1	2	1	1	1	0	19	1	1	1	1	1	#NULL!
542	4	2	1	#NULL!	#NULL!	#NULL!	#NULL!	#NULL!	#NULL!	PF	#NULL!	1	0	#NULL!	0	#NULL!	2	#NULL!	#NULL!	1	19	1	#NULL!	2	1	1	3	2	1	2	3	2	1	1	0	28	0	1	0	1	1	#NULL!
543	7	1	1	#NULL!	#NULL!	17	1	6	2	顺铂+替吉奥	#NULL!	#NULL!	0	#NULL!	0	#NULL!	3	#NULL!	#NULL!	1	10	0	#NULL!	1	2	1	1	1	0	1	1	1	1	1	0	65	0	1	1	1	1	1
544	4	1	2	#NULL!	#NULL!	#NULL!	#NULL!	#NULL!	#NULL!	药研未揭盲	1	#NULL!	2	1	#NULL!	#NULL!	#NULL!	#NULL!	#NULL!	2	12	0	#NULL!	1	2	1	3	2	0	1	3	2	1	1	0	12	1	1	1	1	1	#NULL!
545	3	1	1	#NULL!	#NULL!	#NULL!	#NULL!	#NULL!	#NULL!		#NULL!	#NULL!	#NULL!	#NULL!	#NULL!	#NULL!	#NULL!	2	#NULL!	2	4	1	#NULL!	1	1	1	4	2	1	2	4	2	0	1	0	4	1	1	1	1	1	#NULL!
546	1	2	2	#NULL!	#NULL!	#NULL!	#NULL!	#NULL!	#NULL!	紫杉醇+卡铂	#NULL!	1	0	#NULL!	0	#NULL!	1	#NULL!	#NULL!	1	60	0	#NULL!	1	1	0	4	2	0	1	4	2	1	1	0	60	1	1	1	1	1	#NULL!
547	3	2	2	#NULL!	#NULL!	#NULL!	#NULL!	#NULL!	#NULL!	TP	#NULL!	1	0	1	2	#NULL!	4	#NULL!	#NULL!	1	29	0	#NULL!	1	1	0	3	2	1	2	3	2	1	1	0	27	0	1	0	1	1	#NULL!
548	4	2	1	#NULL!	#NULL!	12	1	3	1	TP	2	2	0	#NULL!	0	#NULL!	4	#NULL!	#NULL!	1	66	0	0	1	1	0	3	2	0	1	1	1	1	1	0	66	0	1	1	0	1	0
549	1	2	2	#NULL!	#NULL!	#NULL!	#NULL!	#NULL!	#NULL!	替吉奥+顺铂	2	1	1	1	0	#NULL!	1	#NULL!	#NULL!	1	11	1	#NULL!	1	1	0	1	1	1	2	2	1	1	1	0	24	1	1	1	0	1	#NULL!
550	1	2	2	#NULL!	#NULL!	#NULL!	#NULL!	#NULL!	#NULL!		#NULL!	#NULL!	3	2	0	#NULL!	0	#NULL!	#NULL!	2	2	1	#NULL!	1	1	1	3	2	2	2	4	2	0	1	0	3	1	1	1	1	1	#NULL!
551	5	2	2	#NULL!	#NULL!	#NULL!	#NULL!	#NULL!	#NULL!		2	#NULL!	2	1	0	#NULL!	0	#NULL!	#NULL!	1	74	0	#NULL!	1	1	1	4	2	2	2	3	2	1	1	0	74	1	1	1	1	1	#NULL!
552	4	2	2	#NULL!	#NULL!	#NULL!	#NULL!	#NULL!	#NULL!	多西他赛周方案	1	1	2	1	0	#NULL!	1	#NULL!	#NULL!	2	42	0	0	1	2	1	2	1	0	1	3	2	1	1	0	99	1	1	1	0	1	#NULL!
553	1	2	2	#NULL!	#NULL!	#NULL!	#NULL!	#NULL!	#NULL!	PF	2	1	1	1	0	#NULL!	0	#NULL!	#NULL!	2	10	0	#NULL!	2	2	0	3	2	0	1	1	1	1	1	0	44	1	1	0	0	1	#NULL!
554	4	1	1	#NULL!	#NULL!	#NULL!	#NULL!	#NULL!	#NULL!	雷替曲赛+顺铂	2	#NULL!	#NULL!	#NULL!	#NULL!	#NULL!	#NULL!	#NULL!	#NULL!		35	0	0	1	1	0	4	2	0	1	2	1	1	1	0	35	1	1	0	0	1	#NULL!
555	5	2	1	#NULL!	#NULL!	#NULL!	#NULL!	#NULL!	#NULL!	奥沙利铂+氟尿嘧啶	2	2	0	#NULL!	0	#NULL!	0	#NULL!	#NULL!	2	20	1	#NULL!	2	2	1	4	2	1	2	3	2	1	1	0	30	1	1	0	0	1	#NULL!
556	1	2	1	#NULL!	#NULL!	#NULL!	#NULL!	#NULL!	#NULL!		1	#NULL!	0	#NULL!	0	#NULL!	0	1	#NULL!		7	1	#NULL!	2	1	0	4	2	2	2	3	2	1	1	0	13	1	1	0	0	1	#NULL!
557	3	2	1	#NULL!	#NULL!	#NULL!	#NULL!	#NULL!	#NULL!	紫杉醇+顺铂	2	1	1	1	0	#NULL!	1	1	#NULL!		31	1	#NULL!	1	1	1	3	2	2	2	4	2	1	1	0	35	0	1	1	1	1	#NULL!
558	3	2	1	#NULL!	#NULL!	#NULL!	#NULL!	#NULL!	#NULL!	TP	2	1	2	1	0	#NULL!	0	#NULL!	#NULL!	1	2	0	0	1	2	1	3	2	1	2	3	2	1	1	0	34	0	1	0	0	1	#NULL!
559	1	2	1	#NULL!	#NULL!	#NULL!	#NULL!	#NULL!	#NULL!	TP	2	1	0	#NULL!	0	#NULL!	3	#NULL!	#NULL!	1	22	1	#NULL!	1	1	0	4	2	1	2	3	2	1	1	0	31	1	1	0	0	1	#NULL!
560	5	2	1	#NULL!	#NULL!	#NULL!	#NULL!	#NULL!	#NULL!	力朴素+奈达铂 2周期	2	#NULL!	3	2	#NULL!	#NULL!	#NULL!	#NULL!	#NULL!		10	1	#NULL!	1	1	0	2	1	1	2	2	1	1	1	0	20	1	1	0	0	1	#NULL!
561	6	2	1	#NULL!	#NULL!	#NULL!	#NULL!	#NULL!	#NULL!		1	#NULL!	2	1	0	#NULL!	0	1	#NULL!	2	3	1	#NULL!	1	2	1	4	2	2	2	3	2	1	1	0	14	0	1	1	1	1	#NULL!
562	1	2	2	#NULL!	#NULL!	#NULL!	#NULL!	#NULL!	#NULL!	多西卡铂	2	#NULL!	0	#NULL!	1	#NULL!	1	1	#NULL!	1	9	1	#NULL!	2	1	0	4	2	2	2	4	2	1	1	0	14	1	1	0	0	1	#NULL!
563	3	2	2	#NULL!	#NULL!	#NULL!	#NULL!	#NULL!	#NULL!	TP	2	1	1	1	1	#NULL!	4	#NULL!	#NULL!	2	16	0	#NULL!	1	1	0	3	2	1	2	3	2	1	1	0	16	0	1	0	1	1	#NULL!
564	8	2	2	#NULL!	#NULL!	#NULL!	#NULL!	#NULL!	#NULL!	顺铂	1	1	1	1	0	#NULL!	3	#NULL!	#NULL!		8	1	#NULL!	1	1	0	4	2	2	2	3	2	1	1	0	18	0	1	1	1	1	#NULL!
565	4	2	2	#NULL!	#NULL!	#NULL!	#NULL!	#NULL!	#NULL!	洛铂	1	1	0	#NULL!	0	#NULL!	0	#NULL!	#NULL!		17	0	#NULL!	1	1	0	4	2	2	2	3	2	1	1	0	17	1	1	1	1	1	#NULL!
566	4	1	2	#NULL!	#NULL!	#NULL!	#NULL!	#NULL!	#NULL!	紫杉醇	1	#NULL!	#NULL!	#NULL!	#NULL!	#NULL!	#NULL!	#NULL!	#NULL!	2	10	0	0	2	2	1	3	2	0	1	3	2	1	1	0	10	1	1	0	0	1	#NULL!
567	4	2	2	#NULL!	#NULL!	#NULL!	#NULL!	#NULL!	#NULL!	PF	2	1	2	1	0	#NULL!	1	#NULL!	#NULL!	2	12	0	0	2	2	1	3	2	1	2	2	1	1	1	0	12	1	1	1	1	1	#NULL!
568	8	2	1	#NULL!	#NULL!	21	1	4	1	TC	2	#NULL!	#NULL!	#NULL!	#NULL!	#NULL!	#NULL!	#NULL!	#NULL!		#NULL!	0	0	2	1	0	3	2	2	2	3	2	1	1	0	5.43333	1	1	#NULL!	#NULL!	#NULL!	0
569	1	2	1	#NULL!	#NULL!	38	2	7	2	0	#NULL!	1	#NULL!	#NULL!	#NULL!	#NULL!	#NULL!	#NULL!	#NULL!		#NULL!	0	0	1	1	0	4	2	2	2	3	2	0	1	0	16	1	1	#NULL!	#NULL!	#NULL!	1
570	8	1	1	#NULL!	#NULL!	8	1	3.5	1	TP	2	1	#NULL!	#NULL!	#NULL!	#NULL!	#NULL!	#NULL!	#NULL!		#NULL!	0	#NULL!	1	1	0	2	1	0	1	1	1	1	1	0	3.73333	1	1	#NULL!	#NULL!	#NULL!	0
571	8	2	2	#NULL!	#NULL!	26	2	3.5	1	tp	2	1	#NULL!	#NULL!	#NULL!	#NULL!	#NULL!	#NULL!	4		#NULL!	0	1	1	2	0	4	2	0	1	3	2	1	1	0	21	1	1	#NULL!	#NULL!	#NULL!	0
572	7	2	1	#NULL!	#NULL!	#NULL!	#NULL!	4	1	0	#NULL!	1	#NULL!	#NULL!	#NULL!	#NULL!	#NULL!	#NULL!	2		#NULL!	0	1	1	2	1	2	1	2	2	4	2	0	1	0	35	0	1	#NULL!	#NULL!	#NULL!	0
573	3	2	2	#NULL!	#NULL!	#NULL!	#NULL!	7.5	2	TP	2	#NULL!	#NULL!	#NULL!	#NULL!	#NULL!	#NULL!	#NULL!	#NULL!		#NULL!	0	0	2	2	0	2	1	1	2	2	1	1	1	0	28.2333	1	1	#NULL!	#NULL!	#NULL!	1
574	3	2	2	#NULL!	#NULL!	24	2	4	1	TP	2	1	#NULL!	#NULL!	#NULL!	#NULL!	#NULL!	#NULL!	#NULL!		#NULL!	1	#NULL!	1	2	1	3	2	0	1	3	2	1	1	0	33.2333	1	1	#NULL!	#NULL!	#NULL!	0
575	8	2	1	#NULL!	#NULL!	#NULL!	#NULL!	#NULL!	#NULL!		#NULL!	#NULL!	#NULL!	#NULL!	#NULL!	#NULL!	#NULL!	#NULL!	#NULL!		#NULL!	#NULL!	#NULL!	1	2	1	3	2	2	2	4	2	0	1	0	27	1	1	#NULL!	#NULL!	#NULL!	#NULL!
576	3	2	2	#NULL!	#NULL!	#NULL!	#NULL!	#NULL!	#NULL!	同步多西他赛+顺铂化疗4周期	2	1	#NULL!	#NULL!	#NULL!	#NULL!	#NULL!	#NULL!	#NULL!		#NULL!	#NULL!	0	1	1	1	4	2	2	2	3	2	1	1	0	21	1	1	#NULL!	#NULL!	#NULL!	#NULL!
577	3	2	2	#NULL!	#NULL!	#NULL!	#NULL!	#NULL!	#NULL!	放疗同步联合5周期PD-1单抗，放疗后PD-1治疗，多西他赛+顺铂化疗，甲磺酸阿帕替尼治疗	2	1	#NULL!	#NULL!	#NULL!	#NULL!	#NULL!	1	#NULL!		#NULL!	#NULL!	0	1	2	1	3	2	2	2	3	2	1	1	0	31	1	1	0	0	#NULL!	#NULL!
578	8	2	2	#NULL!	#NULL!	#NULL!	#NULL!	#NULL!	#NULL!	放疗同步替吉奥化疗	1	2	#NULL!	#NULL!	#NULL!	#NULL!	#NULL!	#NULL!	#NULL!		#NULL!	#NULL!	0	1	2	0	4	2	1	2	3	2	1	1	0	38	1	1	0	0	#NULL!	#NULL!
579	7	1	2	#NULL!	#NULL!	#NULL!	#NULL!	#NULL!	#NULL!	放疗同步多西他赛周方案化疗，放疗后多西他赛+奈达铂辅助化疗5周期	2	2	#NULL!	#NULL!	#NULL!	#NULL!	#NULL!	#NULL!	#NULL!		#NULL!	#NULL!	0	1	1	0	2	1	1	2	4	2	1	1	0	86	0	1	#NULL!	1	#NULL!	#NULL!
580	1	2	2	#NULL!	#NULL!	#NULL!	#NULL!	#NULL!	#NULL!	放疗同步口服替吉奥化疗	1	1	#NULL!	#NULL!	#NULL!	#NULL!	#NULL!	#NULL!	#NULL!		#NULL!	#NULL!	0	1	2	0	1	1	1	2	3	2	1	1	0	27	1	1	0	1	#NULL!	#NULL!
581	5	2	2	#NULL!	#NULL!	#NULL!	#NULL!	#NULL!	#NULL!	放疗前PF方案化疗1周期，同步1周期口服替吉奥化疗	2	1	#NULL!	#NULL!	#NULL!	#NULL!	#NULL!	#NULL!	#NULL!		#NULL!	#NULL!	0	1	2	1	4	2	1	2	4	2	1	1	0	25	0	1	1	0	#NULL!	#NULL!
582	8	2	2	#NULL!	#NULL!	#NULL!	#NULL!	#NULL!	#NULL!	TP	2	#NULL!	2	#NULL!	0	#NULL!	#NULL!	0	0	1	#NULL!	#NULL!	#NULL!	2	2	0	4	2	1	2	3	2	0	1	0	5	1	1	#NULL!	#NULL!	#NULL!	#NULL!
583	8	2	2	#NULL!	#NULL!	#NULL!	#NULL!	#NULL!	#NULL!		#NULL!	#NULL!	2	1	0	#NULL!	#NULL!	#NULL!	#NULL!	2	58	0	0	2	2	0	4	2	1	1	3	2	1	1	0	58	0	1	#NULL!	#NULL!	#NULL!	#NULL!
584	4	2	2	#NULL!	#NULL!	#NULL!	#NULL!	#NULL!	#NULL!	TP	#NULL!	1	#NULL!	#NULL!	#NULL!	#NULL!	#NULL!	#NULL!	#NULL!		#NULL!	#NULL!	#NULL!	1	2	1	3	2	1	1	3	2	1	1	0	11	1	1	0	0	#NULL!	#NULL!
585	8	1	2	#NULL!	#NULL!	78	2	6	2	TC	2	2	#NULL!	#NULL!	#NULL!	#NULL!	#NULL!	#NULL!	#NULL!		#NULL!	#NULL!	#NULL!	1	1	0	4	2	1	1	4	2	1	1	0	6	1	1	0	1	#NULL!	1
586	1	1	2	#NULL!	#NULL!	#NULL!	#NULL!	#NULL!	#NULL!	TP	#NULL!	2	#NULL!	#NULL!	#NULL!	#NULL!	#NULL!	#NULL!	#NULL!		#NULL!	#NULL!	#NULL!	1	2	0	3	2	1	1	3	2	1	1	0	15	1	1	1	1	#NULL!	#NULL!
587	6	2	1	#NULL!	#NULL!	#NULL!	#NULL!	#NULL!	#NULL!	FP	#NULL!	1	#NULL!	#NULL!	#NULL!	#NULL!	#NULL!	#NULL!	#NULL!		#NULL!	#NULL!	#NULL!	2	1	1	3	2	0	1	2	2	1	1	0	11	1	1	0	0	#NULL!	#NULL!
588	8	2	2	#NULL!	#NULL!	#NULL!	#NULL!	#NULL!	#NULL!	TP	#NULL!	2	#NULL!	#NULL!	#NULL!	#NULL!	#NULL!	#NULL!	#NULL!		#NULL!	#NULL!	#NULL!	2	2	0	3	2	0	1	2	2	1	1	0	9	1	1	0	0	#NULL!	#NULL!
